# Supplementary material for: Cap-proximal nucleotides via differential eIF4E binding and alternative promoter usage mediate translational response to energy stress
Source: eLife journal article supplement (doi:10.7554/elife.21907), 2017-02-08
Supplement: supp [file elife-21907-supp-v1.zip]

Archive with 7 entries (7 files):
- elife_poa_e21907_Figure_1_Figure_Supplement_1.pdf
- elife_poa_e21907_Figure_4_Figure_Supplement_1.pdf
- elife_poa_e21907_Figure_6_Figure_Supplement_1.pdf
- elife_poa_e21907_Supplementary_File_2.txt
- elife_poa_e21907_Figure_2_Figure_Supplement_1.pdf
- elife_poa_e21907_Figure_6_Figure_Supplement_2.pdf
- elife_poa_e21907_Supplementary_File_1.xlsx
