# Supplementary material for: Cap-proximal nucleotides via differential eIF4E binding and alternative promoter usage mediate translational response to energy stress
Source: eLife journal article supplement (doi:10.7554/elife.21907), 2017-02-08
Supplement: supp [file elife-21907-supp-v1.zip › elife_poa_e21907_Supplementary_File_1.xlsx]

## Sheet: All promoters sum>500, Fig 1E,F
Promoter	Start	TSS name	Gene	Name			Gene name	1-Free_-cont normalized	1-Light-cont normalized	1-Heavy-cont normalized	1-Free_-GS normalized	1-Light-GS normalized	1-Heavy-GS normalized			2-Free_-cont normalized	2-Light-cont normalized	2-Heavy-cont normalized	2-Free_-GS normalized	2-Light-GS normalized	2-Heavy-GS normalized	sum1	sum2	Total sum	1_Free_GSvsCont	1_Heavy_GSvsCont	1_Light_GSvsCont	2_Free_GSvsCont	2_Heavy_GSvsCont	2_Light_GSvsCont	1_TE_cont	2_TE_cont	1_TE_GS	2_TE_GS	1_TE_GSvsCont	2_TE_GSvsCont	1_GS_response	2_GS_response	TotalGenes	Annotated	AnnotatedUTRLen	AnnotatedUTRLenAv	AnnotatedUTRSeq	AnnotatedUTRType	AnnotatedENSG	AnnotatedCDSStart	Exonic	ExonicUTRLen	ExonicUTRLenAv
chr5:31351000..31351046,+	31351037	p1@0610007C21Rik	[0610007C21Rik]	0610007C21Rik			0610007C21Rik	95.3878	712.723	417.435	66.3936	163.226	65.9241			69.966	558.058	159.495	61.1526	182.502	132.88	1521.09	1164.05	2685.14	-0.519479	-2.6535	-2.12307	-0.192765	-0.262481	-1.60985	3.55967	3.34909	1.7795	2.35715	-1.78017	-0.991938	-2.05013	-1.06353	4	ENSMUST00000013766|ENSMUST00000201773|ENSMUST00000200748	8|8|57	24.3333	>1|GGTGGAAAGCAGTGGGAA|>2|GGTGGAAAGCAGTGGGAA|>3|GGTGGAAAGCAGTGGGAAATGGCGTCTCGGGAGTCAGGCGGCTCTCGGGCGGCCGCCCTGCTCCTGG|	-	||	31351045|31351045|31351094	-	-
chr15:32174168..32174193,-	32174172	p3@0610007N19Rik,p3@Snord123	[0610007N19Rik, Snord123]	0610007N19Rik, Snord123	0610007N19Rik		0610007N19Rik	40.3564	41.1186	4.48854	11.0656	62.5121	8.50634			68.952	95.1912	0	40.7684	158.637	10.7741	168.048	374.322	542.37	-1.82072		0.5984	-0.750978		0.733808	0.174431	0.46237	2.62848	2.04167	2.45405	1.5793	-0.0662283	0.355705	0	-	-		-	-	-	-	-	-
chr12:87165456..87165505,-	87165466	p1@0610007P14Rik	[0610007P14Rik]	0610007P14Rik			0610007P14Rik	33.0188	137.062	71.8167	8.2992	138.916	138.228			25.35	133.268	0	0	213.387	89.784	527.341	461.789	989.13	-1.92953	0.939858	0.0193115	-5.69209	7.4964	0.677121	2.64307	2.37149	4.97972	9.24637	2.33665	6.87487	0.238352	0.932417	2	ENSMUST00000021676|ENSMUST00000142331	75|211	143	>1|AGGGAGAGCTGGTTTGCGGATGCTGCTGATACTGCTGCAGTAGTACTGGATCGTCAGGCAGAGCGCCCTCTCTTGGAGGGGAGTC|>2|AGGGAGAGCTGGTTTGCGGATGCTGCTGATACTGCTGCAGTAGTACTGGATCGTCAGCTTCCTCAAAAAATGGGAACTTTNNNNNNNNNNNNNNNNNNNNNNNNNNNNNNNNNNNNNNNNNNNNNNNNNNNNNNNNNNNNNNNNNNNNNNNNNNNNNNNNNNNNNNNNNNNNNNNNNNNNNNNNNNNNNNNNNGCAGAGCGCCCTCTCTTGGAGGGGAGTC|	-	|	87157063|87160488	-	-
chr17:25377111..25377165,+	25377143	p1@0610007P22Rik	[0610007P22Rik]	0610007P22Rik			0610007P22Rik	27.5157	117.873	80.7938	66.3936	121.551	119.089			18.252	39.2664	28.7091	18.5311	15.4425	46.6877	533.217	166.889	700.105	1.25563	0.556864	0.0441434	0.0213144	0.691992	-1.31867	2.82967	1.86854	1.84993	1.7185	-0.979741	-0.150043	0.440069	-0.0956973	1	ENSMUST00000063574	54	54	>1|ACGCGCGCACGCTCTTGAACAAACGCTGGAGCTGAGGATTTCATCTCGGATTTCATCTAACATT|	-	-	25377197	-	-
chr11:51502116..51502171,-	51502132	p1@0610009B22Rik	[0610009B22Rik]	0610009B22Rik			0610009B22Rik	40.3564	334.432	224.427	55.328	107.66	133.975			32.448	284.384	54.2283	38.9153	92.655	64.6445	896.178	567.275	1463.45	0.450428	-0.742122	-1.6307	0.258565	0.251356	-1.61267	3.77514	3.3635	2.11675	2.00126	-1.65839	-1.36223	-1.01157	-0.91749	2	ENSMUST00000007921	107	107	>1|CCCGCGGGGTGGACGTTGAGTGTGTGTGATGGCCGGCTGACCTGCTTTCCTCTTTGAGCTTGTCTGCCCCTGAACTAGAGGGAAGTCGGCTTAGGAGCCACATATAGACAGAAGACA|	-	-	51499148	-	-
chr12:4824351..4824384,+	4824366	p1@0610009D07Rik	[0610009D07Rik]	0610009D07Rik			0610009D07Rik	78.8783	2730.28	1647.3	118.955	873.433	465.722			38.532	609.224	331.75	5.55933	482.929	484.834	5914.56	1952.83	7867.39	0.589652	-1.82145	-1.64372	-2.68743	0.546709	-0.334851	5.78541	4.59219	3.48732	7.3201	-2.29809	2.72791	-1.61146	-0.00913119	1	ENSMUST00000046207	229	229	>1|GGAGCTTGCTAGTTCGCTTTCCGGCTTGAGAATGCGTTCTCTGTAGTGTGACTTGGAGCATCTTTTCTAGGAAGTAAACGCGTCCTAATTTGAGACGCGGACTTTCCGGCATTGCTGTAAAAGCTTCCGGCGCTACCTGGCTGTAAATACTCTGTATCTGACGCCGTGTCGCCCACGAAGGCGATCAGGTTTAGAAATATCCAGAGGGATCTTACGGTAACCTACATCAGCCCGCCAAG|	Inr	-	4824595	-	-
chr11:70053296..70053362,-	70053310	p1@0610010K14Rik,p1@Rnasek	[0610010K14Rik, Rnasek]	0610010K14Rik, Rnasek	0610010K14Rik		0610010K14Rik	194.444	411.186	430.9	160.451	441.058	603.95			56.784	139.217	159.495	20.3842	87.0396	111.332	2241.99	574.252	2816.24	-0.276439	0.486596	0.101057	-1.45572	-0.516692	-0.674502	2.11176	2.38496	2.69951	3.25135	0.587746	0.866389	0.217722	-0.699246	1	ENSMUST00000040428	76	76	>1|CTCCTGTCCTAGCATTTCCAGGGTTCCCTCTCCCGGCTTCTGTGCTCCGCTCAGTCTCCAGCGATCCCTCCCTACCTCCGCCCTCC|	-	-	70051830	-	-
chr11:70051107..70051135,-	70051128	p4@0610010K14Rik	[0610010K14Rik]	0610010K14Rik			0610010K14Rik	55.0314	180.922	22.4427	80.2256	375.073	65.9241			16.224	107.09	12.7596	25.9435	30.885	37.7093	779.619	230.612	1010.23	0.539722	1.53367	1.04974	0.660995	1.52689	-1.7774	1.87624	2.84724	2.45131	1.38565	0.575069	-1.46159	1.01091	-0.523106	8	ENSMUST00000100950	-16	0	>1||	-	-	70048905	-	-
chr11:70051072..70051102,-	70051090	p5@0610010K14Rik	[0610010K14Rik]	0610010K14Rik			0610010K14Rik	25.6813	208.334	49.374	116.189	175.381	104.203			54.756	113.04	19.1394	16.678	131.963	32.3222	679.162	367.898	1047.06	2.15606	1.06994	-0.247758	-1.68557	0.740923	0.222397	3.30193	1.26374	1.26319	3.26196	-2.03873	1.99822	0.481163	-0.0467111	8	ENSMUST00000100950	-54	0	>1||	-	-	70048905	-	-
chr11:70051140..70051153,-	70051145	p6@0610010K14Rik	[0610010K14Rik]	0610010K14Rik			0610010K14Rik	22.0126	106.908	35.9083	41.496	255.258	159.494			11.154	55.9248	19.1394	20.3842	109.501	32.3222	621.077	248.426	869.503	0.899522	2.13567	1.25167	0.841587	0.740923	0.96312	2.67041	2.69688	3.30566	2.76869	0.635256	0.0718127	1.46605	0.907877	8	ENSMUST00000100950	1	1	>1|GGCCCCCCGTA|	-	-	70048905	-	-
chr11:70051388..70051421,-	70051415	p3@0610010K14Rik	[0610010K14Rik]	0610010K14Rik			0610010K14Rik	47.6939	762.065	188.519	315.37	1064.44	482.735			31.434	148.736	19.1394	53.7402	157.233	96.9667	2860.82	507.249	3368.07	2.71241	1.35419	0.481843	0.764269	2.31116	0.0798844	4.30265	2.39852	2.2927	2.23136	-2.00995	-0.167156	0.899428	0.626362	6	ENSMUST00000108575|ENSMUST00000108579|ENSMUST00000021181|ENSMUST00000102569|ENSMUST00000108578|ENSMUST00000108577	110|110|110|110|110|110	110	>1|CAGGGAGGGCGGGACTTCCTGCGCGGGAGCCCGAGCGGCCGGCTGCCGGGCTCTCCGTGGTTTCCAGCTCGCGTGGTGGTGGTGGCGGCGGAGCGTCTCCGTGAGGAGGTGCGCGGGGCC|>2|CAGGGAGGGCGGGACTTCCTGCGCGGGAGCCCGAGCGGCCGGCTGCCGGGCTCTCCGTGGTTTCCAGCTCGCGTGGTGGTGGTGGCGGCGGAGCGTCTCCGTGAGGAGGTGCGCGGGGCC|>3|CAGGGAGGGCGGGACTTCCTGCGCGGGAGCCCGAGCGGCCGGCTGCCGGGCTCTCCGTGGTTTCCAGCTCGCGTGGTGGTGGTGGCGGCGGAGCGTCTCCGTGAGGAGGTGCGCGGGGCC|>4|CAGGGAGGGCGGGACTTCCTGCGC…	-	|||||	70049499|70048905|70048905|70048961|70048961|70048961	-	-
chr11:70051354..70051387,-	70051369	p2@0610010K14Rik	[0610010K14Rik]	0610010K14Rik			0610010K14Rik	212.788	2568.54	547.602	1593.45	4191.79	2050.03			115.596	617.553	73.3677	261.288	509.603	265.761	11164.2	1843.17	13007.4	2.90173	1.90348	0.706506	1.17308	1.84982	-0.276943	3.86912	2.57425	1.96948	1.5674	-1.89964	-1.00684	1.2348	0.361957	7	ENSMUST00000108575|ENSMUST00000108579|ENSMUST00000021181|ENSMUST00000102569|ENSMUST00000108578|ENSMUST00000108577|ENSMUST00000108576	64|64|64|64|64|64|64	64	>1|CGGGCTCTCCGTGGTTTCCAGCTCGCGTGGTGGTGGTGGCGGCGGAGCGTCTCCGTGAGGAGGTGCGCGGGGCC|>2|CGGGCTCTCCGTGGTTTCCAGCTCGCGTGGTGGTGGTGGCGGCGGAGCGTCTCCGTGAGGAGGTGCGCGGGGCC|>3|CGGGCTCTCCGTGGTTTCCAGCTCGCGTGGTGGTGGTGGCGGCGGAGCGTCTCCGTGAGGAGGTGCGCGGGGCC|>4|CGGGCTCTCCGTGGTTTCCAGCTCGCGTGGTGGTGGTGGCGGCGGAGCGTCTCCGTGAGGAGGTGCGCGGGGCC|>5|CGGGCTCTCCGTGGTTTCCAGCTCGCGTGGTGGTGGTGGCGGCGGAGCGTCTCCGTGAGGAGGTGCGCGGGGCC|>6|CGGGCT…	-	||||||	70049499|70048905|70048905|70048961|70048961|70048961|70048905	-	-
chr17:26012437..26012481,+	26012444	p1@0610011F06Rik	[0610011F06Rik]	0610011F06Rik			0610011F06Rik	38.522	137.062	255.847	207.48	218.792	274.329			7.098	41.6462	98.8869	14.8249	141.79	165.203	1132.03	469.449	1601.48	2.41409	0.100438	0.672773		0.737468	1.75536	3.33367	4.21427	1.24696	4.32661	-2.08671	0.112335	0.698823	1.12161	4	ENSMUST00000026827|ENSMUST00000169308|ENSMUST00000169085|ENSMUST00000163356	30|30|30|30	30	>1|CCCCGCGCGCATTCTGGCTGGGGCTGGCCGCACCGCTGCG|>2|CCCCGCGCGCATTCTGGCTGGGGCTGGCCGCACCGCTGCG|>3|CCCCGCGCGCATTCTGGCTGGGGCTGGCCGCACCGCTGCG|>4|CCCCGCGCGCATTCTGGCTGGGGCTGGCCGCACCGCTGCG|	-	|||	26012474|26012474|26012474|26012474	-	-
chr2:156373306..156373350,+	156373332	p1@0610011L14Rik	[0610011L14Rik]	0610011L14Rik			0610011L14Rik	12.8407	21.9299	457.831	38.7296	6.94579	393.418			26.364	7.13934	213.723	0	14.0386	226.256	931.696	487.521	1419.22	1.55611	-0.218496	-1.59093	-5.7476	0.0820234		5.16992	3.04267	3.3531	8.91166	-1.81682	5.86899	-0.165716	-0.0409476	4	ENSMUST00000109570|ENSMUST00000029158|ENSMUST00000150212|ENSMUST00000126250	474|331|507|437	437.25	>1|CGTCCCGTTTCCGCGGAACCGGAGCTTGAGGTGCTACGGTGAGTGTCGGCCCTCGGTGCGCCTTTCGGCCTCCGGTTTCCTTGTGTGTGGTCGGGCCACCTCGCTTCTTGTCTCAGAATCGCGCTGGCGGAGTCTGGCTTTGTGAGCTGGTGTCTGAGGAGGCCTTTCTTCCTGAGAACCCGTCCCTGAGGACACCGTGGTCAGGGTCTCTGGGGCTCCCGAAGGAACTTCCCCCCACACCCCTTTAACTGTAACCAGAGAACGAGACTCACTCGAGCTGGATCTGCGTGGCTTCCGGATCCTTTGTGTATAATGGACAAGCACTGCACCTGATGAACCGCGTTCTCACCAGCCGCTTGGTTTCATTGTTGATTTCTGAGAAGACCGTCTCTAGCA…	-	|||	156376428|156376428|156376428|156376428	-	-
chr16:31948518..31948628,-	31948528	p1@0610012G03Rik	[0610012G03Rik]	0610012G03Rik			0610012G03Rik	45.8595	446.822	89.7709	99.5904	121.551	36.1519			8.112	10.709	41.4687	14.8249	53.3468	10.7741	839.747	139.236	978.982	1.11037	-1.30037	-1.87383		-1.8963	2.2642	3.53424	2.61277	0.660476	2.07613	-2.87376	-0.536647	-1.17716	0.386144	1	ENSMUST00000202722	-5	0	>1||	-	-	31948246	-	-
chr3:88128952..88128997,+	88128967	p1@0610031J06Rik	[0610031J06Rik]	0610031J06Rik			0610031J06Rik	5.50314	175.439	300.732	77.4592	232.684	280.709			29.406	102.331	41.4687	44.4746	57.5584	163.407	1072.53	438.645	1511.17	3.69893	-0.0992339	0.40639	0.588677	1.96549	-0.824691	6.31114	2.27056	2.72068	2.2999	-3.59046	0.0293404	0.294461	0.614459	4	ENSMUST00000177005|ENSMUST00000176519|ENSMUST00000001454|ENSMUST00000176425	36|36|36|36	36	>1|ATGTGACTCTGAGGCTCTTCCGCTGAGTTTAACTAGCTGTGGCTGT|>2|ATGTGACTCTGAGGCTCTTCCGCTGAGTTTAACTAGCTGTGGCTGT|>3|ATGTGACTCTGAGGCTCTTCCGCTGAGTTTAACTAGCTGTGGCTGT|>4|ATGTGACTCTGAGGCTCTTCCGCTGAGTTTAACTAGCTGTGGCTGT|	-	|||	88129003|88129003|88129003|88129003	-	-
chr4:107562435..107562485,+	107562478	p1@0610037L13Rik	[0610037L13Rik]	0610037L13Rik			0610037L13Rik	22.0126	183.663	219.939	118.955	277.832	229.671			23.322	171.344	92.5071	72.2713	124.944	89.784	1052.07	574.172	1626.24	2.40767	0.0623293	0.59582	1.61107	-0.0428704	-0.454059	4.16592	3.47209	2.08837	1.56442	-2.07755	-1.90767	0.557128	-0.000873216	7	ENSMUST00000135454|ENSMUST00000106726|ENSMUST00000106727|ENSMUST00000119394|ENSMUST00000120473|ENSMUST00000125107|ENSMUST00000128474	17|17|17|17|17|131|131	49.5714	>1|GCAGCGACTTAACGTGGACCGGCAGCT|>2|GCAGCGACTTAACGTGGACCGGCAGCT|>3|GCAGCGACTTAACGTGGACCGGCAGCT|>4|GCAGCGACTTAACGTGGACCGGCAGCT|>5|GCAGCGACTTAACGTGGACCGGCAGCT|>6|GCAGCGACTTAACGTGGACCGGCAGCTATGGGGGTAAGGAGAGGCTAGTCGCCATTGGGGCATCCCGTCTGGTAGTAGCCCAGTGAGAGATGGGTCCGAGGCGGCGAGGGGCTCAGAGTGGCGAGCTCAGAGCAGGAGAGA|>7|GCAGCGACTTAACGTGGACCGGCAGCTATGGGGGTAAGGAGAGGCTAGTCGCCATTGGGGCATCCCGTCTGGTAGTAGCCCAGTGAGAGATGGGTC…	-	||||||	107562495|107562495|107562495|107562495|107562495|107562609|107562609	-	-
chr16:14317412..14317463,-	14317436	p1@0610037P05Rik	[0610037P05Rik]	0610037P05Rik			0610037P05Rik	207.285	937.505	691.236	171.517	394.174	363.646			151.086	812.695	720.917	9.26555	788.972	316.04	2765.36	2798.98	5564.34	-0.272542	-0.925705	-1.24893	-3.95629	-1.18845	-0.0427139	2.97104	3.3392	2.14026	6.8228	-0.83078	3.4836	-0.98193	-0.596163	2	ENSMUST00000120707|ENSMUST00000023357	23|23	23	>1|CTGGAGAGGCGTGGCACCAGCAGCCGTTGAAAA|>2|CTGGAGAGGCGTGGCACCAGCAGCCGTTGAAAA|	-	|	14304548|14300222	-	-
chr5:138696955..138697016,+	138696981	p1@0910001L09Rik	[0910001L09Rik]	0910001L09Rik			0910001L09Rik	117.4	1337.73	341.129	284.939	503.57	180.76			109.512	489.045	299.851	122.305	217.599	141.859	2765.52	1380.17	4145.69	1.27562	-0.914374	-1.40863	0.158711	-1.07712	-1.16646	3.83227	2.84309	1.26256	1.55145	-2.56971	-1.29163	-0.889682	-0.898353	1	-	-		-	-	-	-	ENSMUST00000062067	47	47
chr17:79315813..79315849,+	79315841	p1@1110001A16Rik,p1@Gm19292	[1110001A16Rik, Gm19292]	1110001A16Rik, Gm19292	1110001A16Rik		1110001A16Rik	9.1719	194.628	53.8625	82.992	41.6748	10.6329			5.07	28.5574	15.9495	18.5311	64.5777	8.9784	392.962	141.664	534.626	3.10977	-2.28778	-2.20997			1.16326	4.68615	3.0144	-0.660891	1.96026	-5.34704	-1.05414	-0.9268	0.886669	2	ENSMUST00000180077|ENSMUST00000063817	25|193	109	>1|GTGCGCTTGCGCAGTCGGGTTGCGGAGGCCTCAGG|>2|GTGCGCTTGCGCAGTCGGGTTGCGGAGGCCTCAGGTAAGGACCGGGCAGTGTTTCTTGTCCTCTGTTCCCCAATGTGTGGCGCGTGGGGTCTGTGACATTCTTGGGTGTGGGGAACACTCGAGCGAGCCCGCCCCGCAGGCGCAGGAGCGCGAGCGTTTCCGGGTCGCCGAGCCGCGACGCATGCTGGGACCAGGACCCCGGG|	-	|	79317697|79317697	-	-
chr6:38484833..38484872,+	38484860	p1@1110001J03Rik	[1110001J03Rik]	1110001J03Rik			1110001J03Rik	38.522	126.097	44.8854	44.2624	170.172	34.0253			31.434	115.419	0	0	130.559	34.1179	457.964	311.531	769.495	0.198	-0.394574	0.430981	-5.99702	6.11345	0.177099	2.1357	1.85996	2.19313	8.36787	0.0574293	6.50792	0.245491	0.164736	1	ENSMUST00000019833	12	12	>1|CAGGCTCTCCAAGGACAGAAAA|	-	-	38484872	-	-
chr12:55757483..55757504,-	55757494	p1@1110002B05Rik	[1110002B05Rik]	1110002B05Rik			1110002B05Rik	188.941	945.728	233.404	55.328	333.398	114.836			127.764	636.591	121.216	25.9435	133.367	68.2358	1871.64	1113.12	2984.75	-1.76269	-1.02008	-1.50278	-2.27813	-0.824387	-2.2507	2.63852	2.56367	3.0068	2.9341	0.368282	0.370437	-1.441	-1.9581	1	ENSMUST00000056228	25	25	>1|GGGCCCGCCTGACGCTGCTACACCGCGGGAGGCGC|	-	-	55747418	-	-
chr11:79955625..79955664,-	79955644	p1@1110002N22Rik	[1110002N22Rik]	1110002N22Rik			1110002N22Rik	23.8469	101.426	175.053	71.9264	102.45	165.874			14.196	52.3552	51.0384	7.41244	29.4811	39.505	640.576	193.988	834.565	1.57278	-0.0774824	0.0144285		-0.365469	-0.817989	3.50797	2.82161	1.89207	3.13453	-1.61589	0.312919	0.179785	-0.618853	2	ENSMUST00000050207|ENSMUST00000131601	24|229	126.5	>1|GAGGAGGAACACAGGCGTGGGAAAGAGCCTGGCG|>2|GAGGAGGAACACAGGCGTGGGAAAGAGCCTGGCGATGGCTTGGAGGACAAACCTTGCTTGCCTCATCAAGGCCGGAGNNNNNNNNNNNNNNNNNNNNNNNNNNNNNNNNNNNNNNNNNNNNNNNNNNNNNNNNNNNNNNNNNNNNNNNNNNNNNNNNNNNNNNNNNNNNNNNNNNNNNNNNNNNNNNNNNNNNNNNNNNNNNNNCTACACTCCTCTTAAAGACAATTCTCTGTGATAAT|	-	|	79950337|79951447	-	-
chr5:65884029..65884107,-	65884071	p1@1110003E01Rik	[1110003E01Rik]	1110003E01Rik			1110003E01Rik	29.3501	93.2022	26.9313	38.7296	184.063	55.2912			35.49	226.079	3.1899	5.55933	134.771	30.5266	427.568	435.616	863.184	0.394208	1.02422	0.977962	-2.57037	3.07185	-0.744163	2.01482	2.67452	2.61215	4.77412	0.597322	2.0996	0.893309	-0.630398	4	ENSMUST00000196121	132	132	>1|GAATCCAAACAGAGGGGAGGAGGCCGGCGGCCAGCAGCATCGGCAGCGACAGCGGCGTCCGGAACGCTCCCGGCCGCCACCCTCCCCGCCCGCCGCTGTTTTGGGCGGGTTTAAATAGTTGAGTAAAATTACGCTGGTGACC|	-	-	65818808	ENSMUST00000139122	132	132
chr5:65884164..65884209,-	65884180	p2@1110003E01Rik	[1110003E01Rik]	1110003E01Rik			1110003E01Rik	9.1719	90.461	8.97709	27.664	98.9775	61.6709			28.392	124.938	3.1899	9.26555	136.175	82.6013	296.922	384.562	681.484	1.54198	2.71372	0.129123	-1.5649	4.49322	0.123768	3.36916	2.15447	2.51647	4.4889	-0.852697	2.33444	0.791171	0.541505	3	-	-		-	-	-	-	ENSMUST00000139122|ENSMUST00000121661	241|36	138.5
chr16:90935047..90935102,-	90935070	p1@1110004E09Rik	[1110004E09Rik]	1110004E09Rik			1110004E09Rik	198.113	2779.62	2253.25	370.698	4589.43	2626.33			64.896	1187.51	373.218	203.842	512.41	824.217	12817.4	3166.09	15983.5	0.902227	0.220997	0.723326	1.64371	1.14195	-1.21177	4.66349	4.57734	4.28099	2.71008	-0.382499	-1.86726	0.536303	-0.0775994	1	ENSMUST00000023694	106	106	>1|GTTCCTCCTCGGAGCAGCGGTTAATCTCAGGCTGGTGTGGGTCCGGCCGACCCGGCTCGGGCCTCGTGGTCCCTGCCCCGCAGCCTTGCCACCTCGGCGGCGCCTCTGGCGCAGCC|	-	-	90926216	-	-
chr16:90935008..90935024,-	90935018	p2@1110004E09Rik	[1110004E09Rik]	1110004E09Rik			1110004E09Rik	16.5094	285.089	170.565	44.2624	882.116	482.735			8.112	205.851	111.647	11.1187	75.8087	138.267	1881.28	550.804	2432.08	1.39595	1.49818	1.62784		0.307284	-1.43518	4.74511	5.20652	4.93084	4.20697	0.185725	-0.99955	1.57641	-0.530984	2	ENSMUST00000023694|ENSMUST00000149833	54|54	54	>1|CGGCTCGGGCCTCGTGGTCCCTGCCCCGCAGCCTTGCCACCTCGGCGGCGCCTCTGGCGCAGCC|>2|CGGCTCGGGCCTCGTGGTCCCTGCCCCGCAGCCTTGCCACCTCGGCGGCGCCTCTGGCGCAGCC|	-	|	90926216|90927363	-	-
chr16:90935027..90935038,-	90935032	p4@1110004E09Rik	[1110004E09Rik]	1110004E09Rik			1110004E09Rik	27.5157	496.165	233.404	66.3936	1366.58	499.747			23.322	360.537	153.115	68.5651	213.387	113.128	2689.81	932.054	3621.86	1.25563	1.09672	1.46076	1.53566	-0.435005	-0.755294	4.70373	4.43183	4.80258	2.24333	0.0988545	-2.1885	1.35153	-0.442224	2	ENSMUST00000023694|ENSMUST00000149833	68|68	68	>1|GGGTCCGGCCGACCCGGCTCGGGCCTCGTGGTCCCTGCCCCGCAGCCTTGCCACCTCGGCGGCGCCTCTGGCGCAGCC|>2|GGGTCCGGCCGACCCGGCTCGGGCCTCGTGGTCCCTGCCCCGCAGCCTTGCCACCTCGGCGGCGCCTCTGGCGCAGCC|	-	|	90926216|90927363	-	-
chr16:90934993..90935005,-	90934999	p5@1110004E09Rik	[1110004E09Rik]	1110004E09Rik			1110004E09Rik	3.66876	180.922	161.588	71.9264	496.624	133.975			16.224	115.419	0	46.3277	84.2318	71.8272	1048.7	334.03	1382.73	4.11883	-0.269438	1.45426	1.48544	7.17647	-0.452145	6.36249	2.79313	3.12328	1.74127	-3.23921	-1.05186	1.01998	0.618571	2	ENSMUST00000023694|ENSMUST00000149833	35|35	35	>1|CCTGCCCCGCAGCCTTGCCACCTCGGCGGCGCCTCTGGCGCAGCC|>2|CCTGCCCCGCAGCCTTGCCACCTCGGCGGCGCCTCTGGCGCAGCC|	-	|	90926216|90927363	-	-
chr7:123236853..123236886,+	123236865	p1@1110004F10Rik	[1110004F10Rik]	1110004F10Rik			1110004F10Rik	77.044	2683.68	2913.07	431.558	2865.14	2307.34			65.91	1175.61	992.059	150.102	930.762	1529.92	11277.8	4844.36	16122.2	2.47814	-0.33624	0.0943778	1.18127	0.624702	-0.336766	6.17356	5.02893	3.5817	4.03054	-2.59186	-0.998395	-0.0178422	0.225078	3	ENSMUST00000032899|ENSMUST00000106608|ENSMUST00000106607	111|105|89	101.667	>1|AGGGGGCTCTGCGTTCTGGAGTGGCGCTGCTTGGTCCGGCGGCTGGGTGAGGGCTGCTGGTGTCGCGTTTGAGGAGAACTGCGAGTGTGTTTGGCATATCCCCGTCAGGATCCCAGCTACG|>2|AGGGGGCTCTGCGTTCTGGAGTGGCGCTGCTTGGTCCGGCGGCTGGCTTGGATCTAGCAATTGGGAGGCAGCAGACTTAGGCAATGAAGAAAGAAAACAAAAGTTCTTGAGACTC|>3|AGGGGGCTCTGCGTTCTGGAGTGGCGCTGCTTGGTCCGGCGGCTGGGGGAAGAAGACAAGAAAATTAATGAAGAGCTGGAGTCTCAGTACCAGCAGAGC|	-	||	123236976|123243022|123246777	-	-
chr7:123236810..123236843,+	123236824	p2@1110004F10Rik	[1110004F10Rik]	1110004F10Rik			1110004F10Rik	33.0188	1285.64	1274.75	94.0576	1238.09	1163.24			31.434	580.666	331.75	42.6215	310.254	597.961	5088.79	1894.69	6983.48	1.49622	-0.132006	-0.0543548	0.433315	0.848991	-0.903178	6.25553	4.83732	4.6668	4.39735	-1.58873	-0.439968	-0.0555749	0.0106348	3	ENSMUST00000032899|ENSMUST00000106608|ENSMUST00000106607	152|146|130	142.667	>1|GAGCGGCCGCAGCAGTGACGACTGTAGCGGTGAAGGGCCGGAGGGGGCTCTGCGTTCTGGAGTGGCGCTGCTTGGTCCGGCGGCTGGGTGAGGGCTGCTGGTGTCGCGTTTGAGGAGAACTGCGAGTGTGTTTGGCATATCCCCGTCAGGATCCCAGCTACG|>2|GAGCGGCCGCAGCAGTGACGACTGTAGCGGTGAAGGGCCGGAGGGGGCTCTGCGTTCTGGAGTGGCGCTGCTTGGTCCGGCGGCTGGCTTGGATCTAGCAATTGGGAGGCAGCAGACTTAGGCAATGAAGAAAGAAAACAAAAGTTCTTGAGACTC|>3|GAGCGGCCGCAGCAGTGACGACTGTAGCGGTGAAGGGCCGGAGGGGGCTCTGCGTTCTGGAGTGGCGCTG…	-	||	123236976|123243022|123246777	-	-
chr13:49311347..49311421,-	49311363	p1@1110007C09Rik	[1110007C09Rik]	1110007C09Rik			1110007C09Rik	110.063	630.486	475.786	135.554	507.043	295.595			58.812	443.829	354.079	9.26555	202.156	131.085	2154.53	1199.23	3353.75	0.299309	-0.685766	-0.314078	-2.60255	-1.43012	-1.13259	3.32342	3.75073	2.56147	5.09488	-0.761946	1.34415	-0.374409	-1.32143	1	ENSMUST00000048946	52	52	>1|CGGAGCCCTCGCGCCGGGCGGCGGACAGCCGAGGACGACGGGGCGGCGCCGTGTCCTCCGCC|	-	-	49298488	-	-
chr2:156688846..156688906,+	156688891	p1@1110008F13Rik	[1110008F13Rik]	1110008F13Rik			1110008F13Rik	104.56	989.588	22.4427	8.2992	111.133	255.19			13.182	11.8989	15.9495	0	101.078	39.505	1491.21	181.614	1672.83	-3.57769	3.47829	-3.1488		1.28214	3.03431	3.26869	1.05099	5.38157	8.1404	2.11288	7.08941	-1.57431	1.76431	1	ENSMUST00000029165	148	148	>1|GCCGCTGGGCAGAGCGAGCAGAGCCTCGGCGGGCCACTGTCCCTCGCTGCCCGGACTACCGCTGCCGCCCCGCGCGCCGAGTCCCGCGGTCCCAGACCCCGACTCCCTTCGGCTTNNNNNNNNNNNNNNNNNNNNNNNNNNNNNNNNNNNACGGGAGG|	-	-	156689039	-	-
chr2:32237341..32237428,-	32237380	p1@1110008P14Rik	[1110008P14Rik]	1110008P14Rik			1110008P14Rik	78.8783	243.971	134.656	44.2624	166.699	119.089			77.064	218.94	35.0889	59.2995	141.79	48.4834	787.555	580.666	1368.22	-0.826458	-0.176548	-0.548094	-0.375253	0.460864	-0.624988	2.25586	1.71437	2.67711	1.67366	0.421243	-0.0407129	-0.470495	-0.407062	2	ENSMUST00000146423|ENSMUST00000048792	91|91	91	>1|GTGCTCAACCAGCTGCTCGCACCTTCCGCCCAGCGCCGGCTTTCCGCGCGACGATCGCCAAGTTCCATCTTCGCGTGGCCTCTGCGGCGCCCGAGCCCGCA|>2|GTGCTCAACCAGCTGCTCGCACCTTCCGCCCAGCGCCGGCTTTCCGCGCGACGATCGCCAAGTTCCATCTTCGCGTGGCCTCTGCGGCGCCCGAGCCCGCA|	-	|	32234983|32234880	-	-
chrX:67639045..67639119,+	67639051	p1@1110012L19Rik	[1110012L19Rik]	1110012L19Rik			1110012L19Rik	5.50314	46.6011	103.237	49.7952	46.8841	72.3039			6.084	15.4686	121.216	9.26555	26.6734	91.5797	324.324	270.287	594.611	3.06663	-0.510837	0.00864184		-0.402566	0.766961	4.64634	4.38101	1.25079	3.60412	-3.39556	-0.776892	0.121069	-0.16237	1	ENSMUST00000053981	295	295	>1|TGGTGTGCGTGCTTACGTAAATTGTGTAAGTTCGGGCACGGATGTGTTTCTGGGTCTCTTCTTAAAGCAGTCAGAGTTAAAGTCCCAGAACGCCAGTTAAAGTTAAGGCTATAGCCAAATGCTTTCCTTTCTTTAGAGCGGACATTATCCACCCACTCTCAGGAGTCTTTGGTACTGGCGGACTTCCGGGAACGCTGGAAGAGAGAGAAAGGACTGGGTGTAAACTGGAGTCTGCCGCGTGATAAGTGACAAAGCTGAGAGGCCCACAGCACCCAAAGGACACAGGCCCAGAGACTCTGAGGAAA|	-	-	67641088	-	-
chr19:6077183..6077229,-	6077194	p1@1110014N23Rik	[1110014N23Rik]	1110014N23Rik			1110014N23Rik	78.8783	274.124	341.129	124.488	125.024	257.317			26.364	160.635	207.343	57.4464	98.2705	125.698	1200.96	675.757	1876.72	0.654972	-0.406086	-1.12949	1.10904	-0.719813	-0.706119	2.95554	3.77783	1.61496	1.95372	-1.34058	-1.82412	-0.453327	-0.48602	3	ENSMUST00000025711|ENSMUST00000160590	17|17	17	>1|TCACCCCTTTGAGTTGAGGTTGGAGCT|>2|TCACCCCTTTGAGTTGAGGTTGGAGCT|	-	|	6068114|6076297	ENSMUST00000159832	17	17
chr12:86311764..86311834,-	86311798	p1@1110018G07Rik	[1110018G07Rik]	1110018G07Rik			1110018G07Rik	5.50314	156.251	175.053	13.832	57.3028	406.178			16.224	69.0136	108.457	38.9153	91.2512	113.128	814.119	436.989	1251.11		1.21198	-1.43926	1.23684	0.0605629	0.400431	5.78847	3.41164	5.01675	2.37794	-0.771718	-1.0337	0.502381	0.328164	3	ENSMUST00000043169|ENSMUST00000167448|ENSMUST00000165886	595|526|197	439.333	>1|TTTGGGAAACGTAAAAGCTCCGAGCCGGCTCCTAACGCTGGCGGAGATCGACACTGGAGATTTTTTTGGGGGGCGGGTGGAGGGTAGGATTTGTGCTGGATGAGGCCGCTGCTTCCTCGGACCCCAGAACTAGGACTTGGCCACGTTGCAGCCCCCGTTCGGGTAACGTTTTTCTTCACGCCGCAGCCGGAGGCAGAGCCCAGCCGACCGTAGGCACCAGAATTGCTGAAGGAGGATCCTGGTTCCAGAACAGATGCCTCTTTCAGCATTGGTTACATCTTTCGCTAGAGGAGCCCAGGAATGATACTTTCTTGGGCTCTATTTCTTCACCCAGCATTCAAATGCTTCAGTCCAAAACCACTTGACTCTTTGCTTCCTGGGACACACTTAACCTCA…	-	||	86261427|86282731|86282740	-	-
chr17:29853914..29853973,-	29853929	p1@1110021J02Rik	[1110021J02Rik]	1110021J02Rik			1110021J02Rik	38.522	871.715	188.519	210.246	454.949	159.494			75.036	604.464	159.495	105.627	533.468	140.063	1923.45	1618.15	3541.6	2.43315	-0.240514	-0.937393	0.490559	-0.186809	-0.180095	4.76463	3.3392	1.54495	2.66702	-3.21969	-0.672183	-0.413729	-0.106679	2	ENSMUST00000129091|ENSMUST00000128751	10|10	10	>1|CGGAAAAGACAGCAAGCAAT|>2|CGGAAAAGACAGCAAGCAAT|	-	|	29837172|29841310	-	-
chr10:23516752..23516857,+	23516817	p1@1110021L09Rik	[1110021L09Rik]	1110021L09Rik			1110021L09Rik	25.6813	287.83	242.381	71.9264	104.187	91.4431			25.35	105.9	57.4182	16.678	122.136	43.0963	823.449	370.579	1194.03	1.46798	-1.40144	-1.46164	-0.589603	-0.40981	0.204883	4.34132	2.66386	1.43722	3.27022	-2.9041	0.606362	-1.05357	-0.0524826	2	ENSMUST00000119597|ENSMUST00000179321	129|129	129	>1|AAGGATCAGCGAGGTTTCTTGTCCCGGCTCAAGTCTTCACCTCTGGACCGGAATGCGGAGTCCGATCCCCGCAGCTCGCCCGCTGCCACCGCACCTCGCCCGCTGAGCCTGGAGCGCCGGAAGACCCCGAGAGCGGCTC|>2|AAGGATCAGCGAGGTTTCTTGTCCCGGCTCAAGTCTTCACCTCTGGACCGGAATGCGGAGTCCGATCCCCGCAGCTCGCCCGCTGCCACCGCACCTCGCCCGCTGAGCCTGGAGCGCCGGAAGACCCCGAGAGCGGCTC|	-	|	23516946|23516946	-	-
chr11:121065940..121066031,-	121065996	p1@1110031I02Rik	[1110031I02Rik]	1110031I02Rik			1110031I02Rik	11.0063	76.7548	237.893	0	239.63	174.38			0	38.0765	73.3677	3.70622	74.4048	37.7093	739.664	227.264	966.928		-0.446976	1.63612		-0.95102	0.957336	4.77553	7.80664	9.69526	4.74272	4.91973	-3.06392	0.345853	0.0553233	1	ENSMUST00000026169	121	121	>1|TGAGCCGGACGAAGACCGAGCGCGTCGCTCCCGCGTCCCGACCCCGTTCCCGCCTCGCTTTCGCTGTCGCAGCTATTGCCCCGAGTTTGGTGGCTCTCGTGTCGTAGCTGGCTCTGCGACGGCTGGGCCCG|	-	-	121039115	-	-
chr12:70298114..70298144,-	70298119	p1@1110034A24Rik	[1110034A24Rik]	1110034A24Rik			1110034A24Rik	51.3626	290.572	354.595	22.1312	125.024	202.025			33.462	82.1024	73.3677	25.9435	53.3468	34.1179	1045.71	302.34	1348.05	-1.19638	-0.810101	-1.21341	-0.361006	-1.09342	-0.617322	3.63802	2.19928	3.85533	1.73401	0.217307	-0.465266	-0.99518	-0.733808	1	-	-		-	-	-	-	-	-
chr12:70298085..70298104,-	70298090	p2@1110034A24Rik	[1110034A24Rik]	1110034A24Rik			1110034A24Rik	12.8407	82.2373	148.122	38.7296	65.985	163.747			14.196	54.7349	25.5192	0	11.2309	43.0963	511.661	148.777	660.439	1.55611	0.14422	-0.315508		0.74463	-2.23527	4.11311	2.45811	2.55307	6.77682	-1.56004	4.31871	0.142295	-0.792277	1	-	-		-	-	-	-	-	-
chr1:57463290..57463351,-	57463314	p1@1110034B05Rik	[1110034B05Rik]	1110034B05Rik			1110034B05Rik	40.3564	433.116	435.389	102.357	312.561	153.114			4.056	133.268	25.5192	11.1187	158.637	80.8056	1476.89	413.404	1890.3	1.332	-1.50465	-0.469977		1.64378	0.250536	4.41073	5.12772	2.18023	4.36817	-2.2305	-0.759544	-0.677613	0.620134	2	ENSMUST00000160837	28	28	>1|CCAGGCCTGTGAATTTCACCATGGCTGAGCAGCGTCTT|	-	-	57445509	ENSMUST00000162686	10	10
chr4:11413149..11413192,+	11413185	p1@1110037F02Rik	[1110037F02Rik]	1110037F02Rik			1110037F02Rik	22.0126	90.461	408.457	0	38.2019	216.912			21.294	71.3934	220.103	1.85311	65.9816	91.5797	776.044	472.205	1248.25		-0.911522	-1.23285		-1.2605	-0.112904	4.47145	3.74395	8.99782	6.06977	4.52637	2.32582	-1.02851	-0.970201	3	ENSMUST00000055372|ENSMUST00000059914|ENSMUST00000108307	4|4|4	4	>1|CGCCCGCGGCAGAC|>2|CGCCCGCGGCAGAC|>3|CGCCCGCGGCAGAC|	-	||	11413189|11413189|11413189	-	-
chr17:35089404..35089420,-	35089412	p1@1110038B12Rik	[1110038B12Rik]	1110038B12Rik			1110038B12Rik	1091.46	1239.04	974.014	1792.63	955.046	542.279			600.288	773.428	296.661	1037.74	815.645	342.975	6594.46	3866.74	10461.2	0.715563	-0.844318	-0.375409	0.789214	0.208961	0.0766252	1.01945	0.833477	-0.259608	0.158888	-1.27906	-0.674589	-0.00636925	0.394838	0	-	-		-	-	-	-	-	-
chr15:76778920..76778969,+	76778958	p1@1110038F14Rik	[1110038F14Rik]	1110038F14Rik			1110038F14Rik	27.5157	87.7197	107.725	38.7296	45.1476	208.405			18.252	107.09	153.115	14.8249	53.3468	111.332	515.243	457.961	973.204	0.485707	0.948814	-0.950561	-0.291169	-0.457986	-0.998612	2.80614	3.7973	2.69511	3.43008	-0.111025	-0.367221	0.389809	-0.632016	1	ENSMUST00000071792	10	10	>1|TCCGGCGGCCGCTCCGACTA|	-	-	76778968	-	-
chr15:76779158..76779208,+	76779196	p2@1110038F14Rik	[1110038F14Rik]	1110038F14Rik			1110038F14Rik	22.0126	249.453	166.076	41.496	98.9775	187.139			21.294	124.938	137.166	1.85311	293.408	93.3754	765.155	672.034	1437.19	0.899522	0.171781	-1.32921		-0.552351	1.22838	4.20788	3.59089	2.7708	7.36268	-1.43708	3.77179	-0.416876	0.454901	1	-	-		-	-	-	-	-	-
chr13:34027896..34027944,+	34027921	p1@1110046J04Rik	[1110046J04Rik]	1110046J04Rik			1110046J04Rik	20.1782	106.908	40.3969	85.7584	52.0934	10.6329			9.126	94.0013	0	33.356	73.0009	10.7741	315.968	220.258	536.227	2.06056	-1.87716	-1.03015	1.8144		-0.362572	2.83752	3.29533	-0.448139	1.31569	-3.28566	-1.97963	-0.173155	0.182864	0	-	-		-	-	-	-	-	-
chr2:91284786..91284883,-	91284797	p1@1110051M20Rik	[1110051M20Rik]	1110051M20Rik			1110051M20Rik	73.3752	268.642	341.129	71.9264	310.824	312.608			56.784	105.9	146.735	24.0904	98.2705	140.063	1378.5	571.844	1950.35	-0.0285744	-0.125772	0.210052	-1.22004	-0.0669072	-0.107349	3.04629	2.14371	3.1068	3.27984	0.0605132	1.13613	0.0255438	-0.237248	3	ENSMUST00000064652|ENSMUST00000102594|ENSMUST00000094835	27|27|215	89.6667	>1|GAAGAAAGCTGGAGCGTGGAAACTACCCGGTCAAAGG|>2|GAAGAAAGCTGGAGCGTGGAAACTACCCGGTCAAAGG|>3|GAAGAAAGCTGGAGCGTGGAAACTACCCGGTCAAAGGATGCTGAGTCCCGAGCGCCTAGCTCTACCGGACTACGAGTATCTGGTTTTAACAGCGTATGCCAAGGAACTCACATTCTCTTCCGGGAATTCAGCTTTATACAAGCCACACCTCATAATAGAGCATCATTCCTTCGGGCCTTCTGGAGATGCTTCCGAACTGTAGGGAAAAATGGTGACCTGCTGACC|	-	||	91117131|91118939|91118939	-	-
chr4:59796672..59796748,-	59796724	p1@1110054O05Rik	[1110054O05Rik]	1110054O05Rik			1110054O05Rik	36.6876	222.041	179.542	58.0944	197.955	329.62			15.21	176.104	63.798	11.1187	283.581	183.159	1023.94	732.97	1756.91	0.655941	0.874661	-0.165256	-0.43524	1.51419	0.685784	3.4346	3.93569	3.17191	5.32965	-0.262688	1.39396	0.417854	0.904138	3	ENSMUST00000095063|ENSMUST00000107526	182|191	186.5	>1|AGGAGGCGGAAGTTGGTGCCGGCGGGAAGGTTGTAGCGCGGTGCATTGCTGCACTCTCGCCGGGTTCTGCGTGGGCGCGCCCCCCTGCACGGCTGCGACCGGACAGCGAGCTTTCTCCAGGCTCCTCGCATTCCGGATGATTGTAAAGTCCTGATCAGTGGCCACTGAATATAATTGACCCAGAATAGGAAG|>2|AGGAGGCGGAAGTTGGTGCCGGCGGGAAGGTTGTAGCGCGGTGCATTGCTGCACTCTCGCCGGGTTCTGCGTGGGCGCGCCCCCCTGCACGGCTGCGACCGGACAGCGAGCTTTCTCCAGGCTCCTCGCATTCCGGGTTTTCAAAATAAAAATAGAGTTGCAATTTTGGCTGAACTGGACAAAGAGAAAAGAAAACTACT…	-	|	59785235|59785235	-	-
chr12:8214925..8214967,+	8214953	p1@1110057K04Rik	[1110057K04Rik]	1110057K04Rik			1110057K04Rik	36.6876	252.194	412.946	24.8976	224.002	344.507			43.602	434.31	267.952	5.55933	227.426	174.181	1295.23	1153.03	2448.26	-0.550129	-0.261075	-0.170666	-2.86361	-0.61994	-0.931819	4.16185	3.99412	4.48569	6.05228	0.323837	2.05816	-0.24191	-0.87249	2	ENSMUST00000037383|ENSMUST00000169104	47|59	53	>1|ACTTCCGGGTCTGGTGAGGCTTTGCCGAGACGTCGGCGGACGACCCCAATACCTTAG|>2|ACTTCCGGGTCTGGTGAGGCTTTGCCGAGACGTCGGCGGACGACCCCAATACCTTGTGAGTGGGCAGAG|	-	|	8227407|8227407	-	-
chr1:24012447..24012485,-	24012470	p1@1110058L19Rik	[1110058L19Rik]	1110058L19Rik			1110058L19Rik	78.8783	381.033	520.671	85.7584	173.645	40.4051			8.112	109.47	19.1394	29.6498	160.041	21.5482	1280.39	347.96	1628.35	0.11992	-3.6714	-1.13152	1.80773	0.166907	0.545829	3.50664	3.9061	1.31458	2.59442	-2.19206	-1.31168	-1.70793	0.625779	1	ENSMUST00000027338	32	32	>1|CCACCTTGGTGCGCGTGCGCAGACGCTGTGGGAGCCGGCGCA|	-	-	24003089	-	-
chr19:21727235..21727259,-	21727252	p1@1110059E24Rik	[1110059E24Rik]	1110059E24Rik			1110059E24Rik	152.254	1197.92	987.48	254.509	618.176	418.937			51.714	215.37	105.267	51.8871	98.2705	127.493	3629.28	650.002	4279.28	0.739341	-1.23603	-0.953882	0.00477417	0.275183	-1.12801	3.83895	2.62068	2.02465	2.11072	-1.8143	-0.509957	-0.85563	-0.422731	4	ENSMUST00000177577	55	55	>1|GAACGTCTTTACTCTTTCCTGTAACTTAAAGGCTGCACCGATTTACAGTGCTTGAGATTTTGGTG|	InrAC	-	21665083	ENSMUST00000038830|ENSMUST00000179768|ENSMUST00000178523	55|55|55	55
chr19:21727269..21727309,-	21727289	p2@1110059E24Rik	[1110059E24Rik]	1110059E24Rik			1110059E24Rik	73.3752	556.472	623.908	99.5904	310.824	176.506			6.084	147.546	12.7596	14.8249	88.4434	57.4618	1840.68	327.12	2167.8	0.438142	-1.81869	-0.839187		2.12806	-0.735089	3.99863	4.61021	2.28508	3.25602	-1.71355	-1.35419	-1.09436	-0.0497762	4	ENSMUST00000177577	92	92	>1|CTTCCGGGTCACTGTCCTTAGTCTCAATCTGGGGCGGGAACGTCTTTACTCTTTCCTGTAACTTAAAGGCTGCACCGATTTACAGTGCTTGAGATTTTGGTG|	-	-	21665083	ENSMUST00000038830|ENSMUST00000179768|ENSMUST00000178523	92|92|92	92
chr9:122860078..122860124,-	122860089	p1@1110059G10Rik	[1110059G10Rik]	1110059G10Rik			1110059G10Rik	31.1845	287.83	291.755	22.1312	104.187	136.101			23.322	147.546	299.851	16.678	115.117	183.159	873.19	785.673	1658.86	-0.485462	-1.09726	-1.46164	-0.471733	-0.709615	-0.356697	4.19442	4.2328	3.41138	4.12043	-0.783039	-0.112368	-1.21719	-0.578967	2	ENSMUST00000035154|ENSMUST00000118422	60|60	60	>1|GGCGACAGACACTTTGTACCCTGCCAAGTCTGCCGAGTGCTATTTATTGTTGGTCAGAACCAGAACTACC|>2|GGCGACAGACACTTTGTACCCTGCCAAGTCTGCCGAGTGCTATTTATTGTTGGTCAGAACCAGAACTACC|	-	|	122857011|122857193	-	-
chr6:134879136..134879182,+	134879145	p1@1190002F15Rik	[1190002F15Rik]	1190002F15Rik			1190002F15Rik	1102.46	2379.4	462.32	489.653	918.581	161.62			450.216	678.237	178.634	478.102	411.332	96.9667	5514.03	2293.49	7807.52	-1.17008	-1.51339	-1.37264	0.0866087	-0.878061	-0.720797	1.36563	0.927702	1.14066	0.088268	-0.224969	-0.839434	-1.32882	-0.40593	0	-	-		-	-	-	-	-	-
chr6:134879107..134879121,+	134879111	p2@1190002F15Rik	[1190002F15Rik]	1190002F15Rik			1190002F15Rik	135.744	252.194	85.2823	52.5616	53.8299	4.25317			80.106	103.52	12.7596	44.4746	40.7121	5.38704	583.865	286.96	870.825	-1.36045	-4.17372	-2.21757	-0.841776		-1.33573	1.31073	0.534834	0.142815	0.0511902	-1.16791	-0.483644	-2.0916	-1.11225	0	-	-		-	-	-	-	-	-
chr1:153275742..153275848,+	153275777	p1@1190005F20Rik	[1190005F20Rik]	1190005F20Rik			1190005F20Rik	44.0251	106.908	480.274	105.123	32.9925	121.215			35.49	53.5451	149.925	25.9435	39.3082	100.558	890.539	404.77	1295.31	1.24624	-1.98185	-1.6812	-0.444681	-0.573862	-0.441097	3.72235	2.50269	0.550619	2.40821	-3.17173	-0.0944821	-1.28168	-0.525913	1	-	-		-	-	-	-	ENSMUST00000065625	229	229
chr14:76510567..76510625,-	76510601	p1@1200011I18Rik	[1200011I18Rik]	1200011I18Rik			1200011I18Rik	3.66876	156.251	408.457	33.1968	119.815	425.317			7.098	38.0765	162.685	5.55933	39.3082	134.676	1146.71	387.403	1534.11	3.01492	0.058282	-0.381657		-0.271668	0.0453439	7.08302	4.72731	4.01724	4.84779	-3.06578	0.120488	0.0250192	-0.210728	1	ENSMUST00000022585	91	91	>1|CGGGCCTTGCAGCAAATCCTGGTCTACACCGTCCAGCCTGGGTTTAGCTAAACTGCGTGTGCAGGTTGGCTTGGGCTTTGAGCGACTGTGCGTCGCAGCGA|	-	-	76490334	-	-
chr14:76510627..76510638,-	76510632	p2@1200011I18Rik	[1200011I18Rik]	1200011I18Rik			1200011I18Rik	12.8407	60.3073	305.221	16.5984	19.1009	665.621			13.182	17.8483	165.875	5.55933	81.4241	231.643	1079.69	515.531	1595.22	0.358031	1.12357	-1.63332		0.480575	2.15864	4.77805	3.7511	5.32464	5.69347	0.546584	1.94237	0.889402	0.692967	1	ENSMUST00000022585	122	122	>1|TTACGTCATCAGACAAAGCCGGAAAAACCTTCGGGCCTTGCAGCAAATCCTGGTCTACACCGTCCAGCCTGGGTTTAGCTAAACTGCGTGTGCAGGTTGGCTTGGGCTTTGAGCGACTGTGCGTCGCAGCGA|	-	-	76490334	-	-
chr11:86900254..86900283,-	86900270	p1@1200011M11Rik	[1200011M11Rik]	1200011M11Rik			1200011M11Rik	29.3501	115.132	184.03	22.1312	71.1944	287.089			19.266	51.1653	25.5192	25.9435	57.5584	55.6661	708.927	235.119	944.045	-0.399422	0.64015	-0.689611	0.419894	1.11012	0.168311	3.32753	1.96529	3.98673	2.10456	0.659196	0.139266	0.211324	0.534142	1	ENSMUST00000020801	16	16	>1|ACGCTAGAGGAAGCTCTTTCTCCGCC|	-	-	86891454	-	-
chr11:72861356..72861404,+	72861378	p1@1200014J11Rik	[1200014J11Rik]	1200014J11Rik			1200014J11Rik	45.8595	216.558	991.968	58.0944	269.149	427.443			7.098	83.2923	169.065	16.678	53.3468	159.816	2009.07	489.295	2498.37	0.337898	-1.2136	0.313004		-0.0809217	-0.637956	4.70484	5.05656	3.57252	3.6367	-1.13232	-1.41986	-0.73265	-0.174495	1	ENSMUST00000021135	23	23	>1|GCGGGCTTTCGGTGGTGCGGCCGGCTGGCAGCT|	-	-	72861401	-	-
chr1:153275454..153275531,-	153275462	p1@1200016B10Rik	[1200016B10Rik]	1200016B10Rik			1200016B10Rik	3.66876	191.887	201.984	27.664	41.6748	59.5444			1.014	29.7473	70.1778	11.1187	15.4425	26.9352	526.423	154.435	680.859	2.75616	-1.75371	-2.18956		-1.36523	-0.923926	6.56379	6.05161	1.85267	1.88378	-4.71113	-4.16783	-1.62126	-0.909679	1	-	-		-	-	-	-	ENSMUST00000064771	82	82
chr16:21794393..21794454,+	21794434	p1@1300002E11Rik	[1300002E11Rik]	1300002E11Rik			1300002E11Rik	458.595	1112.94	489.251	149.386	222.265	238.177			229.164	417.651	200.964	35.2091	606.469	84.397	2670.62	1573.85	4244.47	-1.61493	-1.03699	-2.32143	-2.68516	-1.24674	0.537598	1.80364	1.43068	1.62073	4.27509	-0.18291	2.8444	-1.75589	-0.223427	0	-	-		-	-	-	-	-	-
chr13:34744542..34744557,-	34744549	p1@1300014I06Rik	[1300014I06Rik]	1300014I06Rik			1300014I06Rik	45.8595	84.9785	67.3282	8.2992	32.9925	161.62			56.784	58.3046	79.7475	1.85311	61.77	25.1395	401.078	283.599	684.677	-2.39742	1.25711	-1.35172	-4.60549	-1.64609	0.0826084	1.72077	1.27422	4.47079	5.21515	2.75002	3.94093	0.0340593	-1.12983	1	ENSMUST00000053459	246	246	>1|TCAGTCCCACAGACTCCTGGCGGCGCCGCCCTGAGCGCGCGGGCCACACGTAGCCGCCCCAGAGTGAGCGCAGAGCTGCGGCGTATTCGCGGGGCACCAACTTCTCCCCCACGGGGACTCTTAACCGCCGTTGCGGGAATCGAGCGCGTCCCACGGAGAACCCCTGATCGCCCCTGCCAGGACTCACTCTGCCCAGGCGGACCCCANNNNNNNNNNNNNNNNNNNNNNNNNNNNNNNNNNNNNNNNNNNNNNNNNN|	-	-	34720639	-	-
chr9:103207379..103207414,-	103207389	p3@1300017J02Rik	[1300017J02Rik]	1300017J02Rik			1300017J02Rik	328.354	191.887	112.214	431.558	142.389	61.6709			44.616	30.9371	0	187.164	77.2125	12.5698	1268.07	352.5	1620.57	0.393779	-0.858349	-0.429119	2.05644		1.30568	-0.110529	-0.521169	-1.0787	-1.05564	-0.968176	-0.534469	0.00719264	1.86713	1	ENSMUST00000142540	260	260	>1|TTGCGGCAACAGTTTCGGCTGCGGCGCAGCTCATCGTTCGTGGCGAGGGCCTGCGGGCGGCCGGACCGATCAGCCTTAAGTCCAGAACGTGCAGAAGTGGGGCGAGGGGGTCCAGTGGCGAGTTCTCCTGACGGTGCCGGGGCAGCGCATGAAGCTAATAGCGGCTTGTGGGTGGGAGGATGTTAAGAAAGTCAAGGTCTGACTCCCCAAAGTGGATGAACAATCAATCCTTACCAAAGCCAAAAACAGTAACGGAAAGAAGACTGGGTG|	-	-	103184890	-	-
chr6:114987842..114987899,-	114987877	p1@1500001M20Rik	[1500001M20Rik]	1500001M20Rik			1500001M20Rik	7.33752	134.321	282.778	47.0288	142.389	214.785			10.14	79.7226	143.546	11.1187	67.3855	61.0531	828.639	372.965	1201.6	2.60033	-0.395972	0.0838484		-1.22662	-0.240906	5.73558	4.39443	2.91177	3.47217	-2.82381	-0.922266	-0.0703859	-0.739925	2	ENSMUST00000032461|ENSMUST00000174848	76|76	76	>1|GGGCGGAAGCGCGGTCCGCACGACCGGGAATTGCGAGCACAGGGTCGGCACAGCACCGTCTGTCCCACCGGCGGGCCAGCCCGCCC|>2|GGGCGGAAGCGCGGTCCGCACGACCGGGAATTGCGAGCACAGGGTCGGCACAGCACCGTCTGTCCCACCGGCGGGCCAGCCCGCCC|	-	|	114954460|114962234	-	-
chr7:25184693..25184746,+	25184699	p2@1500002O20Rik	[1500002O20Rik]	1500002O20Rik			1500002O20Rik	14.675	16.4475	489.251	38.7296	31.2561	380.659			8.112	13.0888	267.952	0	26.6734	154.428	971.018	470.254	1441.27	1.37024	-0.361658	0.905964		-0.79306	0.999779	5.05993	5.03085	3.39408	8.50464	-1.66585	3.47379	-0.207345	-0.673543	1	ENSMUST00000002280	217	217	>1|CTGTGGCTTCCTCTTCTTCCTCCTCTGGGAGCTTCCGGGACGCCAAGGCCTGTTCCGGAATAGCCGGCACCCGTTTTCTCGGCCTCTCTCATTCTCTGGCTTGTGACCTTCCGGCACCATTTACACGGCAGGTGGCTGTGGAGGACCTTCCCCGCCCACGCTGCACTCCCGTCACTCAGAGCGCGCGCTGCGACCCAGGAACTAATCAGCAGCTGCCCTAGGTGACC|	TOP	-	25188416	-	-
chr2:119373501..119373538,+	119373528	p1@1500003O03Rik,p1@Gm20056	[1500003O03Rik, Gm20056]	1500003O03Rik, Gm20056	1500003O03Rik		1500003O03Rik	40.3564	391.998	228.916	102.357	314.297	153.114			5.07	165.395	57.4182	48.1809	117.925	102.354	1231.04	496.342	1727.38	1.332	-0.578654	-0.318262	3.12761	0.828506	-0.486299	3.92692	5.32525	2.1856	2.18117	-1.74132	-3.14407	-0.214689	0.235933	2	ENSMUST00000014221|ENSMUST00000119172	58|58	58	>1|CTCCCTCCTTCCCTTCTGCCGCTGCTGCTTCTGGCGCTGCCGCTCCCGGAGGAGCTCCCGTCACGGTG|>2|CTCCCTCCTTCCCTTCTGCCGCTGCTGCTTCTGGCGCTGCCGCTCCCGGAGGAGCTCCCGTCACGGTG|	TOP|TOP	|	119373586|119373586	-	-
chr2:119373437..119373498,+	119373460	p2@1500003O03Rik,p2@Gm20056	[1500003O03Rik, Gm20056]	1500003O03Rik, Gm20056	1500003O03Rik		1500003O03Rik	29.3501	430.375	278.29	30.4304	458.422	244.557			11.154	147.546	28.7091	31.5029	174.079	156.224	1471.42	549.216	2020.64	0.0512907	-0.186059	0.0909805	1.45738	2.42374	0.237832	4.57031	3.92286	4.50741	3.3697	-0.0629032	-0.553157	-0.00902398	0.947172	2	ENSMUST00000014221|ENSMUST00000119172	126|126	126	>1|CCCCTTGTTTCTCTCCCCGGGCCGCAAGAGAAACAGTGCCCTCTCCCTTCTTGACCCCTGGCCCTTCCCTCCCTCCTTCCCTTCTGCCGCTGCTGCTTCTGGCGCTGCCGCTCCCGGAGGAGCTCCCGTCACGGTG|>2|CCCCTTGTTTCTCTCCCCGGGCCGCAAGAGAAACAGTGCCCTCTCCCTTCTTGACCCCTGGCCCTTCCCTCCCTCCTTCCCTTCTGCCGCTGCTGCTTCTGGCGCTGCCGCTCCCGGAGGAGCTCCCGTCACGGTG|	TOP|TOP	|	119373586|119373586	-	-
chr10:83185626..83185692,+	83185681	p1@1500009L16Rik	[1500009L16Rik]	1500009L16Rik			1500009L16Rik	53.197	438.599	121.191	177.05	281.305	27.6456			28.392	366.486	76.5576	59.2995	174.079	57.4618	1098.99	762.276	1861.26	1.72531	-2.11224	-0.63985	1.04946	-0.410836	-1.07184	3.38326	3.94033	0.801485	1.95617	-2.58177	-1.98416	-0.334592	-0.695885	1	ENSMUST00000150459	52	52	>1|CCTTCTGGGTCTCCTCCACTGGGACCTGAGGTCCAGAGCGCGGCTTCCCTGCGGGTGGCGCG|	TOP	-	83185733	-	-
chr5:122822239..122822399,-	122822350	p1@1500011H22Rik	[1500011H22Rik]	1500011H22Rik			1500011H22Rik	337.526	1367.88	1974.96	243.443	1180.78	1254.68			190.632	822.214	424.257	157.514	301.831	741.616	6359.28	2638.06	8997.34	-0.470589	-0.654289	-0.212112	-0.274514	0.805008	-1.44426	3.30608	2.70579	3.31988	2.72392	0.0137949	0.0181343	-0.458128	-0.258875	1	ENSMUST00000031419	395	395	>1|GCCGAGAGCCGTTATCGGTTGGGCCTCCGGCGAAGGCGGTTGCCTAGGTGATAGCGGATCGCGAATTACGCTCCGCGCCCCCGGGCCGCAGCACCGGTGCTTGGGTTTGACACATAGGGTGACAACCGAAGGTCTGCAGGTCCTCTGAGGGTCTAGAATACTGAGGTGGATAAGGAATACTTGCTTTAGGGTGCGTGTGGATGGATTTGCCCTGACGCGTCCTTGTCAGCGAGAGATGCCCAGGCGCAGGAGCCTGGTTACCTGAGGTTCCTCCGCCCTCGGGTCTACAGCTCCAGGAACTCGGGTCTTCCTCCGCACCATCCGGCGGCCACTTGAGCAGGGTCGGAGTGGGGAGAGCCGGAGGCCGCCGACTCAGAGCCGGTGTGGTGCACGCGT…	-	-	122814803	-	-
chr5:122822021..122822079,-	122822044	p2@1500011H22Rik	[1500011H22Rik]	1500011H22Rik			1500011H22Rik	141.247	2118.98	2266.71	478.587	1828.48	1650.23			51.714	738.922	899.552	85.2431	315.869	680.563	8484.24	2771.86	11256.1	1.75697	-0.457817	-0.212671	0.715583	-0.40222	-1.22479	4.95158	4.97221	2.8604	3.5394	-2.09118	-1.43281	-0.193999	-0.643676	1	-	-		-	-	-	-	ENSMUST00000031419	89	89
chr2:127618203..127618241,-	127618223	p1@1500011K16Rik	[1500011K16Rik]	1500011K16Rik			1500011K16Rik	372.379	786.736	219.939	428.792	507.043	316.861			112.554	349.828	98.8869	88.9493	526.449	96.9667	2631.75	1273.63	3905.38	0.203251	0.525748	-0.633267	-0.33787	-0.0281459	0.588959	1.43353	1.99039	0.941392	2.80221	-0.492143	0.811817	-0.13859	0.343653	1	ENSMUST00000135091	21	21	>1|AGCTCACTCTACTTTGTGCTGAGTGGTTGCA|	InrAC	-	127618032	-	-
chr2:166888713..166888727,+	166888721	p1@1500012F01Rik	[1500012F01Rik]	1500012F01Rik			1500012F01Rik	2348.01	1636.52	1189.46	3054.11	942.891	874.026			785.85	779.378	124.406	1015.5	829.684	253.191	10045	3788.01	13833	0.379243	-0.444345	-0.795145	0.369663	1.02223	0.0901821	0.267266	0.201604	-0.749096	0.0926256	-1.01636	-0.108979	-0.0870443	0.312481	1	-	-		-	-	-	-	ENSMUST00000125674	197	197
chr18:61886047..61886105,+	61886060	p1@1500015A07Rik	[1500015A07Rik]	1500015A07Rik			1500015A07Rik	124.738	370.068	80.7938	547.747	541.772	87.1899			69.966	105.9	9.5697	135.277	206.368	86.1926	1752.31	613.274	2365.58	2.13016	0.109266	0.549279	0.94624	3.10589	0.95921	1.84961	0.718751	0.199292	1.10996	-1.65032	0.391209	1.03098	1.20394	0	-	-		-	-	-	-	-	-
chr15:82176472..82176518,+	82176479	p1@1500032L24Rik	[1500032L24Rik]	1500032L24Rik			1500032L24Rik	289.832	1680.38	197.496	345.8	949.837	136.101			376.194	906.696	38.2788	239.051	565.757	55.6661	3599.45	2181.64	5781.09	0.254319	-0.535499	-0.822707	-0.653059	0.534431	-0.679957	2.69371	1.32765	1.64951	1.3764	-1.0442	0.0487565	-0.598232	-0.618319	1	ENSMUST00000023086	34	34	>1|TTGGATGCGTGGGGTGTGGCTCCCGGCGAGGGGCGGAGCTGGAG|	-	-	82176513	-	-
chr15:82176438..82176465,+	82176459	p2@1500032L24Rik	[1500032L24Rik]	1500032L24Rik			1500032L24Rik	91.719	701.758	125.679	102.357	439.321	63.7975			105.456	298.662	31.899	48.1809	78.6164	25.1395	1524.63	587.954	2112.59	0.157501	-0.972639	-0.675083	-1.12204	-0.33758	-1.91888	3.16639	1.64363	2.2917	1.0987	-0.87469	-0.544931	-0.601835	-1.51783	1	ENSMUST00000023086	54	54	>1|AGTTTCTGCCAGAGGCCGCCTTGGATGCGTGGGGTGTGGCTCCCGGCGAGGGGCGGAGCTGGAG|	-	-	82176513	-	-
chr17:24357683..24357748,-	24357722	p1@1600002H07Rik	[1600002H07Rik]	1600002H07Rik			1600002H07Rik	12.8407	128.838	507.205	91.2912	112.869	667.747			9.126	24.9877	130.786	3.70622	28.0773	77.2142	1520.79	273.897	1794.69	2.78253	0.39639	-0.190122		-0.756461	0.165068	5.57636	4.02099	3.08911	4.65256	-2.48725	0.631562	0.42593	-0.595055	1	ENSMUST00000024930	38	38	>1|GGGCGGCCTTCTGCCCGGAAGGCGCGGGACTCCTTGGCGGCGGCAAAA|	-	-	24352803	-	-
chr17:24357653..24357682,-	24357675	p2@1600002H07Rik	[1600002H07Rik]	1600002H07Rik			1600002H07Rik	12.8407	41.1186	197.496	47.0288	52.0934	265.823			12.168	60.6844	28.7091	0	58.9623	19.7525	616.4	180.276	796.677	1.83297	0.427706	0.337653		-0.528319	-0.0411887	4.1638	2.82703	2.74404	7.3077	-1.41976	4.48067	0.536488	-0.365597	1	ENSMUST00000024930	-9	0	>1||	-	-	24352803	-	-
chr13:18085140..18085196,-	18085158	p1@1600012F09Rik	[1600012F09Rik]	1600012F09Rik			1600012F09Rik	187.107	2727.54	1189.46	553.28	3703.84	1477.98			303.186	1970.46	389.168	233.492	1575.14	651.832	9839.21	5123.27	14962.5	1.5616	0.313193	0.441355	-0.376122	0.743361	-0.322963	4.38415	2.95821	3.22621	3.25087	-1.15794	0.292663	0.4827	-0.114001	1	ENSMUST00000099735	19	19	>1|CGGCTCCGGGACTCGTGGTGTTCCGGGCG|	-	-	18081213	-	-
chr17:15080209..15080286,+	15080232	p1@1600012H06Rik	[1600012H06Rik]	1600012H06Rik			1600012H06Rik	47.6939	287.83	444.366	190.882	317.77	512.507			103.428	136.837	315.8	5.55933	105.29	362.727	1801.05	1029.64	2830.69	1.98953	0.205608	0.142528	-4.10028	0.199579	-0.376524	3.92629	2.12436	2.11801	6.2728	-1.80828	4.14844	0.388645	-0.231431	3	ENSMUST00000052691|ENSMUST00000164837|ENSMUST00000174004	138|203|133	158	>1|GGAGTACCACACTTCCGGGCGCGGCCTCTTTTCCGCCAGCTGGGGCGAGTTCCAGGCTGAGCCCGGGTGCTGCGGGTGCTGCGTGGCCTGCGGGGCGTGGCGCACAGCGACTGCAGATGAGGGAGTCCCCGAGTTGAGTGCCCCAGCG|>2|GGAGTACCACACTTCCGGGCGCGGCCTCTTTTCCGCCAGCTGGGGCGAGTTCCAGGCTGAGCCCGGGTGCTGCGGGTGCTGCGTGGCCTGCGGGGCGTGGCGGTGCACGAATCTTGGTCTGCGTGGACGAGCACCTCGGGTCACGCCTGTCACCCGTACCTTCCCAGCACAGCGACTGCAGATGAGGGAGTCCCCGAGTTGAGTGCCCCAGCG|>3|GGAGTACCACACTTCCGGGCGCGGCCT…	-	||	15080617|15080617|15080617	-	-
chr7:38968823..38968888,+	38968865	p1@1600014C10Rik	[1600014C10Rik]	1600014C10Rik			1600014C10Rik	47.6939	128.838	44.8854	47.0288	937.682	208.405			33.462	122.559	3.1899	16.678	21.058	0	1414.53	196.947	1611.48	-0.020048	2.20255	2.85872	-0.98336		-2.51305	1.85402	1.89427	4.5924	0.327659	2.73838	-1.56661	2.42724	-2.06246	3	ENSMUST00000067854|ENSMUST00000177983	64|64	64	>1|TGGAGCTGGCAGAGCAGAGCCGGCCTCAGTGCCTTGGCGGTCCCAGACTCCAGCTCGGTAAAGGGTCTGCTGAG|>2|TGGAGCTGGCAGAGCAGAGCCGGCCTCAGTGCCTTGGCGGTCCCAGACTCCAGCTCGGTAAAGGGTCTGCTGAG|	-	|	38973635|38973635	-	-
chr12:3235489..3235522,+	3235514	p1@1700012B15Rik	[1700012B15Rik]	1700012B15Rik			1700012B15Rik	302.673	104.167	457.831	641.805	145.862	616.709			595.218	222.509	1253.63	27.7966	1314.02	883.475	2269.05	4296.65	6565.69	1.08312	0.429369	0.483728	-4.39593	-0.504611	2.55936	0.89171	1.30962	0.248559	6.27941	-0.643151	4.96979	0.699385	0.103391	0	-	-		-	-	-	-	-	-
chr9:57110398..57110416,-	57110405	p1@1700017B05Rik	[1700017B05Rik]	1700017B05Rik			1700017B05Rik	40.3564	63.0486	224.427	19.3648	140.652	216.912			24.336	39.2664	19.1394	11.1187	15.4425	61.0531	704.761	170.356	875.117	-1.04035	-0.0490294	1.15132	-1.09599	1.64808	-1.31867	2.81731	1.24598	4.17193	2.72833	1.35462	1.48236	0.201048	0.0820682	1	ENSMUST00000034846	222	222	>1|TCGGGACCACAAACGGCGCCCAGCGGCAGCACGAACGGTCGCGCGGAACGTCTCTCTGGGCTAGCTGCCTGCCGCGACTTCCCGCGCAAGGCCGGCGGGACAGGGACCCGCAGCCTAGGCGGCGCTGAAAGATGCCGCGGCTGCTCCGGGTGGCGGCCGCTAGAAGCCTGGTGCTCTGAAGGTCAGCAAGTCAAGTAGCAGGGGTTCAGGAGAGCTTGACACCTTCATAGTA|	-	-	57101768	-	-
chr12:87423505..87423553,+	87423523	p1@1700019E19Rik	[1700019E19Rik]	1700019E19Rik			1700019E19Rik	67.8721	1441.89	1023.39	171.517	524.407	457.216			24.336	724.643	516.764	79.6837	432.39	400.437	3686.29	2178.25	5864.55	1.33107	-1.16153	-1.45833	1.69088	-0.367526	-0.744265	5.17249	5.64398	2.51335	3.3775	-2.65914	-2.26648	-1.13503	-0.471851	1	ENSMUST00000054565	13	13	>1|AAGTGACATCAGCTGCCGCGGCG|	-	-	87423536	-	-
chr2:119420024..119420068,+	119420062	p1@1700020I14Rik	[1700020I14Rik]	1700020I14Rik			1700020I14Rik	183.438	474.235	166.076	301.538	319.506	80.8102			162.24	729.403	121.216	214.961	301.831	122.106	1525.6	1651.76	3177.36	0.715509	-1.03467	-0.569021	0.404856	0.0105114	-1.27158	1.80068	2.38679	0.408214	0.978125	-1.39247	-1.40867	-0.230881	-0.664359	0	-	-		-	-	-	-	-	-
chr12:87582798..87582886,+	87582843	p1@1700020O03Rik	[1700020O03Rik]	1700020O03Rik			1700020O03Rik	33.0188	63.0486	237.893	30.4304	477.523	1022.89			30.42	114.229	111.647	25.9435	105.29	152.633	1864.8	540.162	2404.96	-0.115947	2.10194	2.91115	-0.225625	0.449399	-0.117035	3.16883	2.87211	5.60067	3.28875	2.43183	0.416637	2.19489	0.147127	1	ENSMUST00000071106	61	61	>1|AACCCAGGCTGGGAGCTACGGCCCCGAAGGCGGCGCCGGGTGCAAGCGACTGCGGCAGCCGATGCGGCCTC|	-	-	87584994	-	-
chr3:88100772..88100831,-	88100823	p1@1700021C14Rik	[1700021C14Rik]	1700021C14Rik			1700021C14Rik	51.3626	38.3774	40.3969	80.2256	39.9383	0			55.77	63.0642	70.1778	25.9435	98.2705	39.505	250.301	352.731	603.032	0.638331	-6.35392	0.0567912	-1.08945	-0.821078	0.635866	0.612157	1.24901	-0.997304	2.38656	-1.60946	1.13754	-0.114569	-0.206668	2	ENSMUST00000107556|ENSMUST00000010682	102|163	132.5	>1|AAGCACGGGCAGTTAGCTGGCTCGCTACAGCGCATGAGTACCCACTAGAGGGTGGGTGCTGGGGTGGAGGCTTTGGATTAATGCTGTAGGCACCAGACCTGTTGCTGTCAAG|>2|AAGCACGGGCAGTTAGCTGGCTCGCTACAGCGCATGAGTACCCACTAGAGGGTGGGTGCTGGGGTGGAGGCTTTGGATTAATGCTGTAGGTAAGATCATGAAGCTCTGTTTTGTCCATCGGTTCTCGTCCGACCGTGAAGGCCAAGGAAGGCACCAGACCTGTTGCTGTCAAG|	-	|	88086688|88086688	-	-
chr10:43260751..43260830,-	43260802	p1@1700021F05Rik	[1700021F05Rik]	1700021F05Rik			1700021F05Rik	34.8532	416.669	565.557	343.034	263.94	161.62			7.098	86.862	44.6586	55.5933	67.3855	71.8272	1785.67	333.425	2119.1	3.28054	-1.80388	-0.65769	2.88414	0.679538	-0.363902	4.79687	4.119	0.310607	1.31656	-4.48627	-2.80244	-0.403908	0.489421	2	ENSMUST00000019932|ENSMUST00000147196	70|70	70	>1|GGGCAGGTGCGGAGGTGGCTCCCGCCTGCGGTCGGCGCGGTCCGGGGAGGGACCAGCGGACTGCGCAGGTCCTGAGCAGC|>2|GGGCAGGTGCGGAGGTGGCTCCCGCCTGCGGTCGGCGCGGTCCGGGGAGGGACCAGCGGACTGCGCAGGTCCTGAGCAGC|	-	|	43245034|43245119	-	-
chr16:32868372..32868404,-	32868395	p1@1700021K19Rik	[1700021K19Rik]	1700021K19Rik			1700021K19Rik	27.5157	271.383	386.015	63.6272	326.452	459.342			29.406	279.624	523.144	46.3277	248.484	734.433	1534.34	1861.42	3395.75	1.1947	0.250615	0.266094	0.646929	0.489028	-0.170014	4.55356	4.74737	3.61606	4.39237	-0.937495	-0.355006	0.310355	0.306464	4	ENSMUST00000115105|ENSMUST00000089684|ENSMUST00000040986	150|150|150	150	>1|CTGAGGCAGCAGTCCTTGACTCTGTCGCTGTCAGGGTGTAGTGCATGGTTCTAAGCTCACCAGCCATGGTGCCTCCCCTCTCTTGAGGGTGCTCCGGGTACCCTGGCGGTCGAAGCGGCCTGGAGCCTCTCTCTGGCCCCGAGACGGCCTTATAGTCCGG|>2|CTGAGGCAGCAGTCCTTGACTCTGTCGCTGTCAGGGTGTAGTGCATGGTTCTAAGCTCACCAGCCATGGTGCCTCCCCTCTCTTGAGGGTGCTCCGGGTACCCTGGCGGTCGAAGCGGCCTGGAGCCTCTCTCTGGCCCCGAGACGGCCTTATAGTCCGG|>3|CTGAGGCAGCAGTCCTTGACTCTGTCGCTGTCAGGGTGTAGTGCATGGTTCTAAGCTCACCAGCCATG…	-	||	32824053|32824053|32824053	-	-
chr16:32868411..32868454,-	32868421	p2@1700021K19Rik	[1700021K19Rik]	1700021K19Rik			1700021K19Rik	11.0063	148.027	170.565	27.664	201.428	304.102			18.252	134.458	204.154	22.2373	105.29	377.093	862.792	861.483	1724.27	1.29143	0.832381	0.443115	0.278018	0.883647	-0.351305	4.79348	4.17664	4.1673	4.40854	-0.626181	0.231896	0.693117	0.499235	4	ENSMUST00000115105|ENSMUST00000089684|ENSMUST00000040986	176|176|176	176	>1|TGGGGGTGGCAGGGGTAGAGCGGCAGCTGAGGCAGCAGTCCTTGACTCTGTCGCTGTCAGGGTGTAGTGCATGGTTCTAAGCTCACCAGCCATGGTGCCTCCCCTCTCTTGAGGGTGCTCCGGGTACCCTGGCGGTCGAAGCGGCCTGGAGCCTCTCTCTGGCCCCGAGACGGCCTTATAGTCCGG|>2|TGGGGGTGGCAGGGGTAGAGCGGCAGCTGAGGCAGCAGTCCTTGACTCTGTCGCTGTCAGGGTGTAGTGCATGGTTCTAAGCTCACCAGCCATGGTGCCTCCCCTCTCTTGAGGGTGCTCCGGGTACCCTGGCGGTCGAAGCGGCCTGGAGCCTCTCTCTGGCCCCGAGACGGCCTTATAGTCCGG|>3|TGGGGGTGGCAGGGGT…	-	||	32824053|32824053|32824053	-	-
chr1:153937371..153937384,-	153937376	p4@1700025G04Rik	[1700025G04Rik]	1700025G04Rik			1700025G04Rik	27.5157	326.208	103.237	27.664	366.391	123.342			26.364	36.8866	3.1899	7.41244	60.3662	1.79568	974.356	136.015	1110.37	0.00761672	0.255575	0.167349	-1.76348		0.703119	3.93984	0.59497	4.12154	2.98539	0.181699	2.39042	0.179018	0.0660057	0	-	-		-	-	-	-	-	-
chr1:44159222..44159243,-	44159232	p1@1700029F09Rik	[1700029F09Rik]	1700029F09Rik			1700029F09Rik	36.6876	375.55	394.992	55.328	293.46	363.646			14.196	391.474	236.053	38.9153	231.638	237.03	1519.66	1149.31	2668.97	0.586167	-0.119132	-0.355307	1.42333	0.00594734	-0.755777	4.37392	5.41733	3.55816	3.57327	-0.815754	-1.84406	-0.180105	-0.33801	10	ENSMUST00000027215|ENSMUST00000156392|ENSMUST00000128190|ENSMUST00000147571|ENSMUST00000133677|ENSMUST00000150911|ENSMUST00000129702|ENSMUST00000147661|ENSMUST00000143327|ENSMUST00000149502	314|120|562|628|192|200|121|258|377|134	290.6	>1|CGAGCGTGTTAGTTCGCTCCCTGAAGAGAGTGAGGGCGGTTGGGCGCTGGCGGTCACTCGTGCGTTCGCTGAACTCACAGTTTTGTTCGCGCGGTGACAGCCTAGGTAGTGCTGCAGACGGAACAGACATCTAGAACAAGTTCATAATGAAGTCTGGAGGAAAGCCGTTTTCCTTAAAATCACAGATTTTGAATGTGCACATTCCTAGTTTGGGGTCATATCCTTGTCTGACAACTCACCTTTTACAACAGAATCTGCTTTTCAGAGAGATGCCCTTTGCTTCTCAGATGTAGTGCACCTTACGCTTATTTTTCAACAGTGAAA|>2|CGAGCGTGTTAGTTCGCTCCCTGAAGAGAGTGAGGGCGGTTGGGCGCTGGCGGTCACTCGTGCGTTCG…	Inr|Inr|Inr|Inr|Inr|Inr|Inr|Inr|Inr|Inr	|||||||||	44143734|44143734|44143734|44143734|44143734|44143734|44143873|44144745|44145346|44145352	-	-
chr1:44159262..44159273,-	44159267	p4@1700029F09Rik	[1700029F09Rik]	1700029F09Rik			1700029F09Rik	16.5094	98.6847	98.748	27.664	74.6673	82.9368			5.07	143.977	31.899	9.26555	80.0203	28.7309	399.21	298.962	698.173	0.727518	-0.250354	-0.400013		-0.148456	-0.843413	3.5406	4.98483	2.48895	3.4838	-1.05165	-1.50103	-0.207086	-0.614448	10	ENSMUST00000027215|ENSMUST00000156392|ENSMUST00000128190|ENSMUST00000147571|ENSMUST00000133677|ENSMUST00000150911|ENSMUST00000129702|ENSMUST00000147661|ENSMUST00000143327|ENSMUST00000149502	349|155|597|663|227|235|156|293|412|169	325.6	>1|GGGCCGCGCTGACGGGGGCGGCGAGGCGGTCGCTTCGAGCGTGTTAGTTCGCTCCCTGAAGAGAGTGAGGGCGGTTGGGCGCTGGCGGTCACTCGTGCGTTCGCTGAACTCACAGTTTTGTTCGCGCGGTGACAGCCTAGGTAGTGCTGCAGACGGAACAGACATCTAGAACAAGTTCATAATGAAGTCTGGAGGAAAGCCGTTTTCCTTAAAATCACAGATTTTGAATGTGCACATTCCTAGTTTGGGGTCATATCCTTGTCTGACAACTCACCTTTTACAACAGAATCTGCTTTTCAGAGAGATGCCCTTTGCTTCTCAGATGTAGTGCACCTTACGCTTATTTTTCAACAGTGAAA|>2|GGGCCGCGCTGACGGGGGCGGCGAGGCGGTCGC…	-	|||||||||	44143734|44143734|44143734|44143734|44143734|44143734|44143873|44144745|44145346|44145352	-	-
chr8:74967773..74967852,+	74967809	p1@1700030K09Rik	[1700030K09Rik]	1700030K09Rik			1700030K09Rik	22.0126	71.2723	314.198	102.357	298.669	455.089			26.364	142.787	98.8869	63.0057	68.7893	220.869	1263.6	620.701	1884.3	2.19184	0.533764	2.05946	1.24121	1.15532	-1.0482	4.09969	3.1723	2.87442	2.19188	-1.22527	-0.980416	1.07014	0.395213	2	ENSMUST00000064853|ENSMUST00000121902	80|80	80	>1|CTCTGGCGCTGTCTCCTGAGGCAACCGCACACTGGGGCCTATACTTTGAGGCTGAAGCCTAGCGGGAAGAAGCCAACGCAGCTACTCAGA|>2|CTCTGGCGCTGTCTCCTGAGGCAACCGCACACTGGGGCCTATACTTTGAGGCTGAAGCCTAGCGGGAAGAAGCCAACGCAGCTACTCAGA|	-	|	74968649|74968649	-	-
chr18:85120869..85120928,-	85120898	p1@1700034H14Rik	[1700034H14Rik]	1700034H14Rik			1700034H14Rik	75.2096	301.537	309.71	41.496	34.729	68.0507			20.28	216.56	22.3293	20.3842	84.2318	55.6661	830.731	419.451	1250.18	-0.850224	-2.178	-3.09989	0.00721678	1.29881	-1.35712	3.01439	3.52609	1.29823	2.74904	-1.71615	-0.777054	-2.2464	-0.691568	1	ENSMUST00000025547	210	210	>1|GGGATGCTTTGCGAAAGCATGGCGGCCACTTTGTGAGTGTCCGCAAGACGGTTAAATAGGGCATTTTAATTCAAGAGAGGAATAAGAAAAGTGGTACCTAACATCTCTTATAGATTATTTTCATCTTGATATCCGCCTAACACAATGCTTAATATCCGCCTGAGTGTGTGGATTACAAACCTTTAGAAGTTGCGGTCCTGAAGCCTGAGTTTTTGTAAAC|	-	-	85117038	-	-
chr2:130985742..130985787,-	130985760	p1@1700037H04Rik	[1700037H04Rik]	1700037H04Rik			1700037H04Rik	27.5157	216.558	89.7709	38.7296	88.5589	76.557			22.308	88.0519	9.5697	16.678	54.7507	17.9568	537.69	209.315	747.005	0.485707	-0.228334	-1.28525	-0.408979	0.874132	-0.68053	3.45313	2.10503	2.07783	2.09143	-1.3753	-0.0136001	-0.710326	-0.422029	3	ENSMUST00000103188|ENSMUST00000028800|ENSMUST00000133602	171|171|309	217	>1|CGCGCTCTCCAGCCCGTTCTGCTGCTGCTACCGCCGCCTCCGCGGTCGTTTCTGACCGCCTGGCCGCGGGGCTCGCCTGCAAGGTTCCTGCTGCTGTCTCTGGAGCATGGCAGGCTGCTGAGGTTGAGTGGCAGTGTCAAGTAGGAGCTGCGTGTCTTGCCCAGTGGCAGGGAGCGTGTCC|>2|CGCGCTCTCCAGCCCGTTCTGCTGCTGCTACCGCCGCCTCCGCGGTCGTTTCTGACCGCCTGGCCGCGGGGCTCGCCTGCAAGGTTCCTGCTGCTGTCTCTGGAGCATGGCAGGCTGCTGAGGTTGAGTGGCAGTGTCAAGTAGGAGCTGCGTGTCTTGCCCAGTGGCAGGGAGCGTGTCC|>3|CGCGCTCTCCAGCCCGTTCTGCTGCT…	-	||	130972610|130972610|130972896	-	-
chr10:5913879..5913954,-	5913934	p1@1700052N19Rik	[1700052N19Rik]	1700052N19Rik			1700052N19Rik	106.394	452.305	1198.44	224.078	369.863	442.329			92.274	556.869	947.4	211.255	391.678	280.126	2793.41	2479.6	5273.01	1.07104	-1.43694	-0.289948	1.1906	-1.75609	-0.507123	3.9493	4.01968	1.85549	1.66672	-2.09381	-2.35296	-0.761542	-0.854005	3	ENSMUST00000118544|ENSMUST00000117489	65|65	65	>1|CCAACGCTTCCTTTCTGGAACCGCGGCCGTTGAACCCCGGGCGACGCCAGTTGAGTGGCTTGTGGTGCCGGTGTG|>2|CCAACGCTTCCTTTCTGGAACCGCGGCCGTTGAACCCCGGGCGACGCCAGTTGAGTGGCTTGTGGTGCCGGTGTG|	TOP|TOP	|	5895659|5906785	ENSMUST00000095893	65	65
chr11:95528303..95528319,+	95528313	p1@1700071K01Rik,p1@Phb	[1700071K01Rik, Phb]	1700071K01Rik, Phb	1700071K01Rik		1700071K01Rik	22.0126	345.396	686.747	58.0944	291.723	610.33			62.868	274.865	488.055	35.2091	179.695	456.103	2014.3	1496.79	3511.1	1.38003	-0.170059	-0.243269	-0.827463	-0.0975806	-0.611787	5.51947	3.59065	3.94518	4.15534	-1.57429	0.564689	-0.134694	-0.299242	2	ENSMUST00000125172|ENSMUST00000036374	70|167	118.5	>1|CACGCGCAGTATCCGGAGCTGGGGAATTCATGTGGAGGTCAGAGTGAAAGCAGGTGTGAGTGGAAGCAACAGAAGGAGTC|>2|CACGCGCAGTATCCGGAGCTGGGGAATTCATGTGGAGGTCAGAGTGAAAGCAGGTAAGCGTGGTAGGAGCGGTAGAGGCCTCTGGTCCTATGTCCCTGTAGCCTGCCTCTGCTTTCCTATGTACAATGAGGGCATGGGATGCATGTGTGGGTGTGAGTGGAAGCAACAGAAGGAGTC|	-	|	95529377|95529377	-	-
chr11:104330746..104330781,-	104330756	p2@1700081L11Rik	[1700081L11Rik]	1700081L11Rik			1700081L11Rik	16.5094	148.027	161.588	13.832	119.815	293.469			10.14	94.0013	54.2283	0	103.886	100.558	753.24	362.814	1116.05	-0.247094	0.858888	-0.30391		0.884826	0.143521	4.1884	3.80512	4.85156	8.67909	0.663168	4.87396	0.388683	0.367387	0	-	-		-	-	-	-	-	-
chr11:101278706..101278721,-	101278714	p1@1700113I22Rik,p1@Aarsd1	[1700113I22Rik, Aarsd1]	1700113I22Rik, Aarsd1	1700113I22Rik		1700113I22Rik	93.5534	405.704	1705.65	293.238	764.037	993.115			65.91	415.272	1716.17	435.481	690.701	824.217	4255.29	4147.75	8403.04	1.64298	-0.779983	0.912383	2.71479	-1.05764	0.733314	4.48888	5.00462	2.58105	1.79738	-1.90784	-3.20724	-0.104793	-0.171952	3	-	-		-	-	-	-	ENSMUST00000070395	13	13
chr14:55305079..55305098,+	55305089	p1@1700123O20Rik	[1700123O20Rik]	1700123O20Rik			1700123O20Rik	9.1719	16.4475	188.519	16.5984	8.68224	72.3039			33.462	7.13934	114.836	0	15.4425	57.4618	311.723	228.342	540.065	0.82199	-1.37644	-0.88415	-6.08585	-0.992674		4.40896	1.8505	2.25269	7.19779	-2.15627	5.34729	-1.12981	-1.08703	1	ENSMUST00000038539	869	869	>1|CGCACCCTCCCATTTTGGGCTCGCGCCGCTGCCGTTAAGGCGGGAACCGGCGTTATCTCTATCCCAGCGCCAGCCACACCAACCACCGTGCGCGTGGATCTGCAGGCTCGCGCTGGCGGCCTGAGAGAGCTCGCGCCGAGCCCGGACACTGCGCCTGCGCCGCGGCGGAGACTCGTCTCTACCGGGTCCGCTCCCCTCCGACACCTCGGCAACGCTGACTTCTCACCCCTTTGAGCCGCTTGACCAGGGCACTCTTCTGCCCGCTCTTGGCTAGGCCTCGCTGCTCCAGTGCGGCCTTCAGGTCGGTCACCCGCAGAGCCTGAAGAGGCTTCCCGTCCAGAGTCACCTCCTCCAGCTCCGCCATCTTGCGTGAGGTACTCGGGTCCGTCCCGACGG…	-	-	55308641	-	-
chr19:10278691..10278727,+	10278707	p1@1810006K21Rik	[1810006K21Rik]	1810006K21Rik			1810006K21Rik	902.515	4196.84	2531.54	1397.03	2759.22	791.089			408.642	2997.33	628.41	311.322	1599	506.382	12578.2	6451.09	19029.3	0.63006	-1.67748	-0.604956	-0.391877	-0.311205	-0.906298	2.89754	3.1478	1.34526	2.75563	-1.55228	-0.392174	-0.625149	-0.739188	1	-	-		-	-	-	-	ENSMUST00000040372	44	44
chr19:10278670..10278681,+	10278675	p3@1810006K21Rik	[1810006K21Rik]	1810006K21Rik			1810006K21Rik	18.3438	123.356	94.2594	94.0576	126.761	38.2785			9.126	103.52	0	5.55933	44.9237	32.3222	495.056	195.452	690.508	2.3271	-1.28901	0.0391245		6.0366	-1.19535	3.53293	3.43379	0.807908	3.68154	-2.72502	0.24775	0.134682	-0.441712	1	-	-		-	-	-	-	ENSMUST00000040372	76	76
chr10:76978520..76978563,-	76978528	p1@1810008A18Rik	[1810008A18Rik]	1810008A18Rik			1810008A18Rik	227.463	1620.07	1508.15	467.522	2205.29	1833.12			247.416	466.437	178.634	209.401	123.54	181.364	7861.61	1406.79	9268.41	1.03777	0.281432	0.44479	-0.240139	0.021815	-1.91242	3.7787	1.38072	3.10932	0.541006	-0.669385	-0.839719	0.42516	-0.794613	1	ENSMUST00000045454	44	44	>1|AGGCTCTTCCACTAGTGAGGCGGCGTTGCTAACAGGCGGAAACCTCCAGGGAAG|	-	-	76951094	-	-
chr19:8963370..8963415,+	8963392	p1@1810009A15Rik,p1@LOC100048454	[1810009A15Rik, LOC100048454]	1810009A15Rik, LOC100048454	1810009A15Rik		1810009A15Rik	609.014	8207.28	3007.32	4160.67	3839.29	1392.91			470.496	3975.42	1422.7	1219.35	3833.95	1318.03	21216.5	12239.9	33456.4	2.77126	-1.1101	-1.09597	1.37291	-0.110204	-0.052269	4.20164	3.5188	0.330568	2.07857	-3.87107	-1.44024	-0.332019	0.118565	3	ENSMUST00000096251|ENSMUST00000191089	23|23	23	>1|TGCGGCTTTTGGAATGAGCCGCGGAGTGTAGCC|>2|TGCGGCTTTTGGAATGAGCCGCGGAGTGTAGCC|	-	|	8963415|8963415	-	-
chr11:78640077..78640120,+	78640090	p1@1810012P15Rik	[1810012P15Rik]	1810012P15Rik			1810012P15Rik	99.0565	202.852	62.8396	121.722	220.529	27.6456			16.224	90.4316	3.1899	22.2373	94.0589	23.3438	734.644	249.486	984.13	0.295912	-1.1702	0.120257	0.443142	2.69196	0.0564307	1.41888	2.4926	1.02476	2.37446	-0.394118	-0.118142	0.0201924	0.344841	2	ENSMUST00000147875|ENSMUST00000141321	63|63	63	>1|GCGCAGGCGCAATCGTGTCGCTCGCGGTGTCTCCAGTTGGCGTCCGCCGGGAAGGCGGGGCTGAGGCTCGCAC|>2|GCGCAGGCGCAATCGTGTCGCTCGCGGTGTCTCCAGTTGGCGTCCGCCGGGAAGGCGGGGCTGAGGCTCGCAC|	-	|	78649534|78649534	-	-
chr16:8830208..8830235,+	8830228	p1@1810013L24Rik	[1810013L24Rik]	1810013L24Rik			1810013L24Rik	38.522	106.908	13.4656	24.8976	93.7682	535.899			34.476	88.0519	0	0	28.0773	34.1179	813.461	184.723	998.184	-0.619595	5.26335	-0.188264	-6.12829	6.11345	-1.63165	1.63115	1.34016	4.63297	6.97028	3.00183	5.63013	2.03902	-0.972558	1	ENSMUST00000023150	324	324	>1|GACGTTCCTCAGTCTTCGAGGTGGGCTCGGCGGCGCAGGCCGGACAGGGAACGCCGGTTGGAGAGCGGCGGCGGTCGGACCGAGGCCGCGGGGCCGTGGGTGGGCGGTAAAGGGGTGCGGGCGAGGCTAGGGCAGGGTGCGGCACCTCGGAGCGGGGTTGGTGGGCAGAGGACTCGGGCTGTGCGGGGTGGGTGCCGGCTCCGCGGGCTTGCACAGAGGCCTGGGCCGGCCGCCGGGCCCCTCGTTCCCGGGCCTGTCGACGACGACGTTCCCGCGGGGACCGCGCTTAAGGAGGANNNNNNNNNNNNNNNNNNNNNNNNNNNNNNNNNNNAGG|	Inr	-	8830552	-	-
chr3:14611250..14611275,-	14611266	p1@1810022K09Rik	[1810022K09Rik]	1810022K09Rik			1810022K09Rik	1124.47	5674.37	6427.6	2857.69	795.293	421.064			134.862	2132.28	1036.72	218.667	1038.86	231.643	17300.5	4793.03	22093.5	1.34521	-3.93057	-2.83412	0.695207	-2.15963	-1.03704	3.42734	4.54936	-1.23194	2.53586	-4.65928	-2.0135	-1.69877	-1.14938	4	ENSMUST00000185384|ENSMUST00000108365|ENSMUST00000186870|ENSMUST00000185423	61|128|61|61	77.75	>1|CCGGAACTTCCTGTGTCCTGAGCTTGTGGATGGCGTCACTGTGAACCTGAGCAGCCGCGTGAACTTTGACA|>2|CCGGAACTTCCTGTGTCCTGAGCTTGTGGATGGCGTCACTGTGAACCTGAGCAGCCGCGTGAACTTTGGTGAGAAGCTAATGGGGTTTTTCGGAGCGCTGGGGTGAAATGTTTGGGGCTCAGGCAGGGCGTGGTGGGA|>3|CCGGAACTTCCTGTGTCCTGAGCTTGTGGATGGCGTCACTGTGAACCTGAGCAGCCGCGTGAACTTTGACA|>4|CCGGAACTTCCTGTGTCCTGAGCTTGTGGATGGCGTCACTGTGAACCTGAGCAGCCGCGTGAACTTTGACA|	-	|||	14606345|14606345|14607161|14606345	-	-
chr2:127033980..127034009,-	127033997	p1@1810024B03Rik	[1810024B03Rik]	1810024B03Rik			1810024B03Rik	91.719	191.887	58.3511	58.0944	131.97	70.1773			29.406	121.369	19.1394	9.26555	199.349	44.892	602.199	423.42	1025.62	-0.654301	0.264178	-0.538345	-1.61466	1.20869	0.71358	1.44304	2.23727	1.79014	4.64741	0.347092	2.41014	-0.393301	0.575819	1	ENSMUST00000056146	325	325	>1|CGGGTCAAGGATTCCATTGACCGACGAGACACACGCGCGTGCAAATTGTGGTTCCAGGCATCTCTACCTGCGACAGAGCCAAGGCCCAACCCCTAAGCCTCCTGGTGACTCTGACCAAGAGAAGAGAAGTGCCATAATGTCGAGGGAGCTCGAGGCCAGTTTCCATGAAGGGGACACCCTGGCACAGGATTACTACATCTTGGGTACCCTAGGTAAAGGGTCCTTTGCACGAGTCAAATTGGCTCTCCACTTTATGACCCATACCCTAGTAGCCATCAAGATGTTGAAAAGGGGCAAAAATCTCAGACTTCCTGGTTATTTCTGAAATTCAAATC|	-	-	127012410	-	-
chr7:80703373..80703420,-	80703381	p2@1810026B05Rik	[1810026B05Rik]	1810026B05Rik			1810026B05Rik	18.3438	41.1186	13.4656	35.9632	222.265	44.6583			16.224	153.496	31.899	61.1526	73.0009	46.6877	375.815	382.46	758.275	0.952351	1.69311	2.42022	1.88224	0.542461	-1.06706	1.54755	3.47449	2.87461	0.963066	1.32706	-2.51143	2.04675	-0.156497	0	-	-		-	-	-	-	-	-
chr11:69652027..69652069,+	69652054	p1@1810027O10Rik	[1810027O10Rik]	1810027O10Rik			1810027O10Rik	207.285	553.731	103.237	367.931	112.869	25.519			92.274	179.673	9.5697	101.921	73.0009	26.9352	1370.57	483.374	1853.95	0.826304	-1.99529	-2.28946	0.14272	1.44601	-1.29355	1.66183	1.03225	-1.40747	-0.0282339	-3.0693	-1.06049	-0.770815	-0.478879	2	ENSMUST00000133967|ENSMUST00000094065	-39|12	6	>1||>2|CCGCGCGTGACCACCCACAGCT|	-	|	69652015|69652066	-	-
chr8:69010393..69010438,-	69010424	p1@1810029B16Rik	[1810029B16Rik]	1810029B16Rik			1810029B16Rik	133.91	4580.61	11580.4	2697.24	3054.41	1822.48			56.784	1677.74	4638.11	776.453	1577.94	3088.57	23869.1	11815.6	35684.7	4.32704	-2.66738	-0.584568	3.76162	-0.586522	-0.0884511	6.90978	6.78482	0.854359	2.5866	-6.05543	-4.19822	-1.10522	-0.22748	1	ENSMUST00000026681	112	112	>1|CTATTTGTTTCCCCCGGGGCCCACGTGTGTTAGGGAAGAAGCGGACTTGAGAGCGGCTGCGCTGCCCTCTGTGAAATTGTCGCATCGGGACATCGCCCGGCCTCGGTGGCCAAGACATCGCC|	TOP	-	69000573	-	-
chr8:69010439..69010450,-	69010444	p2@1810029B16Rik	[1810029B16Rik]	1810029B16Rik			1810029B16Rik	3.66876	260.418	587.999	240.677	270.886	93.5697			0	96.3811	299.851	61.1526	51.943	229.847	1457.22	739.174	2196.39	5.85433	-2.64524	0.0567494	6.94609	-0.382838	-0.885466	7.66986	9.63202	0.59763	2.19494	-7.07223	-7.43708	-0.493403	-0.208094	1	ENSMUST00000026681	132	132	>1|CCTCCCCTTCCTGTCCGCCCCTATTTGTTTCCCCCGGGGCCCACGTGTGTTAGGGAAGAAGCGGACTTGAGAGCGGCTGCGCTGCCCTCTGTGAAATTGTCGCATCGGGACATCGCCCGGCCTCGGTGGCCAAGACATCGCC|	-	-	69000573	-	-
chr4:34725571..34725630,-	34725590	p1@1810030N24Rik	[1810030N24Rik]	1810030N24Rik			1810030N24Rik	126.572	419.41	188.519	304.304	314.297	367.899			56.784	326.03	194.584	48.1809	898.473	107.741	1721	1631.79	3352.79	1.26223	0.962739	-0.415658	-0.234778	-0.84985	1.46106	2.25944	3.18539	1.16336	4.37016	-1.09608	1.18476	0.425304	0.868213	5	ENSMUST00000108132|ENSMUST00000108133|ENSMUST00000108131|ENSMUST00000108134|ENSMUST00000029972	317|321|266|141|86	226.2	>1|CGCACGGGACGCCGGAAGTCTCTGAGCCTGGCGGCGTCCGAGCTGAAGCTTCCCCGGCTTCCCAATTGCCCAAGGTCAGGCTCCGCCAGCCCTCGAAGGGGAGGGTTGTGGTTTGCAGAAGATGCTAGGNNNNNNNNNNNNNNNNNNNNNNNNNNNNNNNNNNNNNNNNNNNNNNNNNNNNNNNNNNNNNNNNNNNNNNNNNNNNNNNNNNNNNNNNNNNNNNNNNNNNNNNNNNNNNNNNNNNNNNNNNNNNNNNNNNNNNNNNNNNNNNNNNNNNNNNNNNNNNNNNNNNNNNNNNNNNNNNNGTAATAATCTTCAGTAGCCAAG|>2|CGCACGGGACGCCGGAAGTCTCTGAGCCTGGCGGCGTCCGAGCTGAAGCTTCCCCGGCTTCCCAA…	-	||||	34716237|34716237|34716237|34716237|34716237	-	-
chrX:12250666..12250709,-	12250699	p1@1810030O07Rik	[1810030O07Rik]	1810030O07Rik			1810030O07Rik	16.5094	79.496	130.168	16.5984	57.3028	89.3165			6.084	70.2035	54.2283	1.85311	33.6927	34.1179	389.391	200.18	589.571	0.00752736	-0.54085	-0.468789		-0.660768	-1.04809	3.62711	4.24603	3.10505	4.85947	-0.522055	0.613437	-0.469403	-0.900943	1	ENSMUST00000060108	33	33	>1|TGCTGCGCGTGCTTACCGCCGGCCCCGCCTTCAGGAGTAAGAC|	-	-	12234988	-	-
chr11:116532972..116533008,+	116532982	p1@1810032O08Rik	[1810032O08Rik]	1810032O08Rik			1810032O08Rik	88.0502	153.51	193.007	437.091	458.422	259.443			142.974	130.888	22.3293	179.752	435.198	129.289	1589.52	1040.43	2629.95	2.30502	0.425808	1.57523	0.329223	2.50721	1.7295	1.97044	0.0994892	0.715134	1.6482	-1.2553	1.54872	1.40915	1.32777	2	ENSMUST00000106378|ENSMUST00000144049	202|202	202	>1|CGATCTCGTCCTTTCCGAGGTCCTCTGCCGCGTGTTTGGAAGTTATGGCCGCGCGGGTCTGTGGTGTTCTCCCTGAAAGGCCTAAGCTTTGGGTGATGGCATTGCCTTTTGGCACTCGGGAGACAAGATGCAGGTTCCGTCTCAGAAGTAATGGCTGGATCCCTGAAAGCCAACGGGCTCGGTGTGGTCCACCCGTCAGAAGGCATAGGTAG|>2|CGATCTCGTCCTTTCCGAGGTCCTCTGCCGCGTGTTTGGAAGTTATGGCCGCGCGGGTCTGTGGTGTTCTCCCTGAAAGGCCTAAGCTTTGGGTGATGGCATTGCCTTTTGGCACTCGGGAGACAAGATGCAGGTTCCGTCTCAGAAGTAATGGCTGGATCCCTGAAAGCCAACGGGCTC…	TOP|TOP	|	116533591|116533591	-	-
chr12:88784854..88784884,+	88784861	p1@1810035L17Rik	[1810035L17Rik]	1810035L17Rik			1810035L17Rik	265.985	1625.56	390.503	879.715	776.192	253.064			118.638	1010.22	153.115	207.548	852.145	192.138	4191.02	2533.8	6724.82	1.7238	-0.624834	-1.06596	0.804285	0.32657	-0.245361	2.91977	3.28818	0.226374	2.32821	-2.6934	-0.959964	-0.25747	-0.0343083	4	ENSMUST00000161023|ENSMUST00000160488|ENSMUST00000077462|ENSMUST00000160880	18|18|24|34	23.5	>1|CCAGGGTTTCGATTCATTCCGTTTTAAC|>2|CCAGGGTTTCGATTCATTCCGTTTTAAC|>3|CCAGGGTTTCGATTCATTCCGTTTTAACATGGCA|>4|CCAGGGTTTCGATTCATTCCGTTTTAACATGGCAGCCTCCGCCA|	-	|||	88784879|88784879|88784885|88784895	-	-
chr3:122627271..122627320,+	122627301	p1@1810037I17Rik,p1@Gm2036	[1810037I17Rik, Gm2036]	1810037I17Rik, Gm2036	1810037I17Rik		1810037I17Rik	423.742	2110.76	507.205	240.677	826.549	153.114			415.74	2609.43	650.74	313.176	3620.57	425.576	4262.04	8035.23	12297.3	-0.814796	-1.72468	-1.35206	-0.408143	-0.612077	0.472404	2.62576	2.96968	2.02293	3.68938	-0.60283	0.7197	-1.31724	0.245971	1	-	-		-	-	-	-	ENSMUST00000106429	76	76
chr3:122627338..122627377,+	122627349	p2@1810037I17Rik	[1810037I17Rik]	1810037I17Rik			1810037I17Rik	755.765	1332.24	318.687	594.776	364.654	144.608			578.994	2463.07	459.346	661.56	2820.36	186.751	3510.73	7170.09	10680.8	-0.345332	-1.13728	-1.86782	0.192169	-1.29618	0.195385	1.12675	2.33454	-0.223735	2.18358	-1.35049	-0.150959	-1.12391	0.0673125	1	-	-		-	-	-	-	ENSMUST00000106429	28	28
chr10:77441365..77441416,+	77441386	p1@1810043G02Rik	[1810043G02Rik]	1810043G02Rik			1810043G02Rik	62.3689	117.873	116.702	199.181	112.869	93.5697			24.336	21.418	22.3293	9.26555	16.8464	7.18272	702.564	101.378	803.942	1.66728	-0.317197	-0.0623172	-1.34666	-1.5712	-0.337484	1.90271	0.833157	0.0515087	1.32872	-1.8512	0.495563	0.449284	-1.02106	2	ENSMUST00000105398	63	63	>1|GCCGCTGCGCAGGCCTCTCCCGCTAGCCGAGTGTACAGCGGANNNNNNNNNNNNNNNNNNNNNTGTGGCCACC|	-	-	77441449	ENSMUST00000105397	63	63
chr11:119960224..119960297,+	119960250	p1@1810043H04Rik	[1810043H04Rik]	1810043H04Rik			1810043H04Rik	421.907	1907.9	354.595	539.448	996.721	185.013			63.882	603.274	35.0889	146.396	254.099	71.8272	4405.59	1174.57	5580.16	0.354185	-0.936686	-0.936381	1.19006	1.02311	-1.24578	2.42153	3.31078	1.13062	1.15197	-1.29091	-2.15881	-0.641053	-0.571704	2	ENSMUST00000106223|ENSMUST00000185558	45|45	45	>1|CGGAAGAGGCAGGGCCCAAGATGGCGGCGCCCTCGAGAGCCTAAAAGGACCGCTC|>2|CGGAAGAGGCAGGGCCCAAGATGGCGGCGCCCTCGAGAGCCTAAAAGGACCGCTC|	-	|	119960295|119960295	-	-
chr11:98300255..98300322,-	98300293	p1@1810046J19Rik	[1810046J19Rik]	1810046J19Rik			1810046J19Rik	262.316	1258.23	291.755	201.947	1524.6	238.177			292.032	846.012	25.5192	163.074	345.351	102.354	3777.03	1774.34	5551.37	-0.376509	-0.292167	0.276936	-0.838654	1.98295	-1.29138	2.56059	1.57578	3.12264	1.45422	0.56205	-0.121569	0.116474	-0.929269	1	ENSMUST00000002655	34	34	>1|GTGGCGTCACACCCGGAAGCAGCCCTGCAGCGGAGCGGGCAGCA|	-	-	98299375	-	-
chr12:73637329..73637383,+	73637365	p1@1810048J11Rik	[1810048J11Rik]	1810048J11Rik			1810048J11Rik	36.6876	95.9435	62.8396	44.2624	43.4112	93.5697			22.308	97.571	153.115	1.85311	105.29	26.9352	376.714	407.072	783.786	0.267466	0.570622	-1.13509		-2.48522	0.109302	2.0987	3.46115	1.61887	5.81773	-0.479828	2.35658	-0.108736	-1.02307	1	ENSMUST00000044352	206	206	>1|GCACGAGCGCAGTTGATCTTAGCCATGGGAACGGGAGCGGTCCTGGAGGCCTCCGGTCAGCTGCTGGCGGGGCCCGCATCCATCCTCGGGCAGGAGTTCCCAACCGACTTCAGCTGGGGAGATGTGGTCCCAGGACGCCCTCGCGTCGCCTCTCCCCTGCGGTGACTCCAGATATTTCTGGTTATAAAAAAGATGTGACTCTCAGACTTATCCTGA|	-	-	73642406	-	-
chr19:3708287..3708395,+	3708342	p1@1810055G02Rik	[1810055G02Rik]	1810055G02Rik			1810055G02Rik	25.6813	246.712	62.8396	47.0288	121.551	78.6836			28.392	71.3934	6.3798	11.1187	28.0773	28.7309	582.496	174.092	756.589	0.860264	0.322094	-1.01826	-1.31423	2.08705	-1.33099	3.5659	1.43785	2.07842	2.3023	-1.48748	0.864449	-0.438348	-0.640456	1	ENSMUST00000039048	405	405	>1|GAGCTGAGCTAACTGGGTTTCGCTGCGGTCCACGTCCCCGCGCGGGGCTGAATCGCTGAAGTGGCTGCGCTGCGGTGTGAGGGCCACGGGCCTGCCGCGTCCGGCAGTGTTGCCTCTCTCAACCGTAGCTGTTTCTGATACCACAGAGGGGCATCTGCCTCTGTCCCACCTGTGCCTTGGCGAATGCCATGGCCTGGGAGTGCCCTGCCCAGCCGCTCTCATCTGCAAAGCCAGACTTCATATGGCAAGGACAGGATGCCAAGGCCCCAGCTGCTCAAGGAGGACATCAGCCTGGCCTCCCAGTCTGCACTGAGCAGCTGTCGCTGATCCCTGGGCCGAGCAGAAGGCGATTGCTGACAGCCTGAAGGGCTGTCTGGCCAAGACACTCAGCCCTGC…	-	-	3715726	-	-
chr6:35202724..35202752,+	35202738	p1@1810058I24Rik	[1810058I24Rik]	1810058I24Rik			1810058I24Rik	91.719	95.9435	71.8167	163.218	29.5196	91.4431			135.876	97.571	200.964	3.70622	148.81	43.0963	543.66	630.023	1173.68	0.828074	0.346413	-1.68378	-5.01892	-2.20824	0.606409	0.867558	1.13272	-0.430696	5.51548	-1.29825	4.38276	0.130947	-1.14904	0	-	-		-	-	-	-	-	-
chr6:35202692..35202717,+	35202709	p2@1810058I24Rik	[1810058I24Rik]	1810058I24Rik			1810058I24Rik	306.341	572.92	188.519	152.152	300.406	129.722			306.228	652.06	306.23	64.8589	922.339	199.32	1650.06	2451.04	4101.1	-1.00725	-0.537561	-0.930281	-2.23051	-0.618267	0.499968	1.31218	1.64426	1.49619	4.10175	0.184012	2.4575	-0.874268	-0.0918163	0	-	-		-	-	-	-	-	-
chr8:128946420..128946459,+	128946427	p1@1810063B05Rik	[1810063B05Rik]	1810063B05Rik			1810063B05Rik	25.6813	276.865	89.7709	13.832	79.8766	46.7848			20.28	84.4822	47.8485	0	130.559	5.38704	532.811	288.557	821.368	-0.869298	-0.932883	-1.78694		-3.03786	0.624988	3.80971	2.67632	3.14935	8.09219	-0.660357	5.41587	-1.47823	-0.166241	1	ENSMUST00000059093	159	159	>1|GGGGCAGGTCAATCGGCGGCGGGTACTTTCGCAGTGAGTTTCCCTGTGCAGTCGGTGGACCTGCGGGGCGACACCGCCGTGCGGGAACCACAGTCCACACCGCTCTCCCACGTAGGCTGAGCCCCGGTCGCATGTTGCGTGGCTTCCCGCGTGACCACTGCAGGCAGGA|	-	-	128946586	-	-
chr8:128946378..128946414,+	128946395	p2@1810063B05Rik	[1810063B05Rik]	1810063B05Rik			1810063B05Rik	33.0188	441.34	148.122	135.554	171.908	108.456			17.238	164.205	57.4182	42.6215	181.098	93.3754	1038.4	555.956	1594.35	2.02113	-0.447904	-1.35769	1.28156	0.69673	0.140869	4.13758	3.64644	1.0457	2.67281	-3.09188	-0.973629	-0.581156	0.408002	1	ENSMUST00000059093	191	191	>1|AAGTCCCGCCCTTCTATTTGCAAACGGAGGCCGGGGCAGGTCAATCGGCGGCGGGTACTTTCGCAGTGAGTTTCCCTGTGCAGTCGGTGGACCTGCGGGGCGACACCGCCGTGCGGGAACCACAGTCCACACCGCTCTCCCACGTAGGCTGAGCCCCGGTCGCATGTTGCGTGGCTTCCCGCGTGACCACTGCAGGCAGGA|	TOP	-	128946586	-	-
chr4:25208899..25208947,-	25208919	p1@1810074P20Rik	[1810074P20Rik]	1810074P20Rik			1810074P20Rik	25.6813	52.0836	368.061	35.9632	118.078	344.507			2.028	55.9248	140.356	11.1187	49.1352	181.364	944.374	439.926	1384.3	0.477903	-0.0952778	1.17316		0.368641	-0.184965	4.00599	6.28245	3.66676	4.31337	-0.339226	-1.96908	0.161083	0.284329	2	ENSMUST00000102994|ENSMUST00000038705	21|232	126.5	>1|GTTTCCCTGTGTCGGGGCGAGCGGAGCAGTG|>2|GTTTCCCTGTGTCGGGGCGAGCGGAGCAGTGATGGCGGACGCCTGGGAGGAGATCCGGCGGCTGGCGGCTGACTTCCAGCGGGCGCAGTTTGCAGAGTCCACGCAAAGGTTGTCAGAGCGGAACTGCATTGAGATTGTGAATAAATTGATCTCTCAGAAACAGCTGGAAGTAGTCCATACACTTGACGGCAAGGAATATATCACTCCAGCCCAAATCAGTAAAGAAATGAGAGACGAGCTAC|	-	|	25177616|25177616	-	-
chr2:126758729..126758826,-	126758770	p1@2010106G01Rik	[2010106G01Rik]	2010106G01Rik			2010106G01Rik	12.8407	32.8949	116.702	5.5328	53.8299	48.9114			2.028	92.8114	95.697	7.41244	23.8657	68.2358	270.712	290.05	560.762		-1.24608	0.702118		-0.484929	-1.9372	3.49199	6.22431	4.09705	3.54884	0.605055	-2.67547	-0.582985	-0.933646	1	-	-		-	-	-	-	ENSMUST00000028844	23	23
chr12:113205165..113205228,-	113205219	p1@2010107E04Rik	[2010107E04Rik]	2010107E04Rik			2010107E04Rik	1329.93	7760.46	1903.14	2547.85	1314.49	363.646			234.234	4099.17	401.927	902.465	1864.33	360.932	15219.5	7863.06	23082.6	0.937678	-2.38617	-2.56118	1.94364	-0.155005	-1.13646	2.86075	4.26134	-0.602276	1.30156	-3.46302	-2.95978	-1.37919	-0.598273	1	ENSMUST00000021719	86	86	>1|CTTTCCCAGCAGGCCCTGCGCGGCGCCTGCGTGCTCTGTGACCTTTCCCATTCTGTAGCAGAATTTGGTGTTGCCTGTGGTCTTGGTCCCGCGGAG|	-	-	113199720	-	-
chr14:31942071..31942109,-	31942094	p1@2010107H07Rik	[2010107H07Rik]	2010107H07Rik			2010107H07Rik	22.0126	476.976	71.8167	66.3936	45.1476	25.519			20.28	161.825	25.5192	7.41244	75.8087	7.18272	707.866	298.028	1005.89	1.57114	-1.47476	-3.38682	-1.393	-1.75989	-1.08897	4.60877	3.17627	0.0893333	3.39943	-4.51944	0.223163	-2.0542	-1.19503	4	ENSMUST00000203261|ENSMUST00000064032|ENSMUST00000049732|ENSMUST00000090205	126|126|126|126	126	>1|GTGGCGCTGCAGTCGAGTCTTGGTGCTCAGTCCACGGGACTCCGCGGACACGCAGGGGTCCGCAGGGTTATTTGTACTGCCTCCGGGAACACCAGTCTGCCTGGTTCCGTCCCTACCCCACTGGGAGGCCTCGGTC|>2|GTGGCGCTGCAGTCGAGTCTTGGTGCTCAGTCCACGGGACTCCGCGGACACGCAGGGGTCCGCAGGGTTATTTGTACTGCCTCCGGGAACACCAGTCTGCCTGGTTCCGTCCCTACCCCACTGGGAGGCCTCGGTC|>3|GTGGCGCTGCAGTCGAGTCTTGGTGCTCAGTCCACGGGACTCCGCGGACACGCAGGGGTCCGCAGGGTTATTTGTACTGCCTCCGGGAACACCAGTCTGCCTGGTTCCGTCCCTAC…	-	|||	31902054|31936939|31937703|31937987	-	-
chr14:31942110..31942146,-	31942122	p2@2010107H07Rik	[2010107H07Rik]	2010107H07Rik			2010107H07Rik	16.5094	353.62	44.8854	8.2992	27.7832	12.7595			12.168	99.9508	54.2283	0	77.2125	5.38704	463.857	248.947	712.804		-1.7752	-3.64622		-3.21667	-0.370269	4.552	3.61002	2.22168	7.37677	-2.33032	3.76675	-3.07402	-1.00561	4	ENSMUST00000203261|ENSMUST00000064032|ENSMUST00000049732|ENSMUST00000090205	154|154|154|154	154	>1|TCCGCGACCTAACTCTTGCGGCCGGGCTGTGGCGCTGCAGTCGAGTCTTGGTGCTCAGTCCACGGGACTCCGCGGACACGCAGGGGTCCGCAGGGTTATTTGTACTGCCTCCGGGAACACCAGTCTGCCTGGTTCCGTCCCTACCCCACTGGGAGGCCTCGGTC|>2|TCCGCGACCTAACTCTTGCGGCCGGGCTGTGGCGCTGCAGTCGAGTCTTGGTGCTCAGTCCACGGGACTCCGCGGACACGCAGGGGTCCGCAGGGTTATTTGTACTGCCTCCGGGAACACCAGTCTGCCTGGTTCCGTCCCTACCCCACTGGGAGGCCTCGGTC|>3|TCCGCGACCTAACTCTTGCGGCCGGGCTGTGGCGCTGCAGTCGAGTCTTGGTGCTCAGTC…	-	|||	31902054|31936939|31937703|31937987	-	-
chr13:63341365..63341402,+	63341382	p1@2010111I01Rik	[2010111I01Rik]	2010111I01Rik			2010111I01Rik	86.2159	282.348	107.725	74.6928	234.42	174.38			52.728	188.003	156.305	48.1809	280.773	100.558	959.782	826.547	1786.33	-0.205701	0.69233	-0.267854	-0.128831	-0.633788	0.577385	2.17122	2.69553	2.44449	2.97151	0.273269	0.275973	0.0216363	0.113292	2	-	-		-	-	-	-	-	-
chr13:63341322..63341360,+	63341350	p3@2010111I01Rik	[2010111I01Rik]	2010111I01Rik			2010111I01Rik	88.0502	175.439	125.679	8.2992	131.97	82.9368			41.574	176.104	25.5192	24.0904	98.2705	91.5797	612.375	457.138	1069.51	-3.33105	-0.596719	-0.409413	-0.774832	1.82331	-0.838364	1.76816	2.26423	4.61355	2.95249	2.84539	0.688255	-0.800645	-0.18451	2	-	-		-	-	-	-	-	-
chrX:7000075..7000100,-	7000084	p1@2010204K13Rik	[2010204K13Rik]	2010204K13Rik			2010204K13Rik	29.3501	205.593	53.8625	11.0656	15.628	27.6456			5.07	95.1912	9.5697	3.70622	33.6927	17.9568	343.145	165.187	508.332	-1.36789	-0.949704	-3.67565		0.874132	-1.4847	3.12246	4.24015	1.92022	3.63206	-1.20224	-0.60809	-2.39931	-0.982059	0	-	-		-	-	-	-	-	-
chr4:108000741..108000785,+	108000774	p1@2010305A19Rik	[2010305A19Rik]	2010305A19Rik			2010305A19Rik	91.719	646.933	601.465	127.254	1217.25	765.57			97.344	333.169	261.572	85.2431	147.406	386.071	3450.19	1310.81	4761	0.470237	0.347797	0.911415	-0.190464	0.560772	-1.17374	3.75945	2.60492	3.95647	2.63869	0.197025	0.0337671	0.654739	-0.161539	1	ENSMUST00000131656	15	15	>1|AAAGCGATTTGTGGGAGTCGGAATC|	-	-	108000789	-	-
chr8:73300746..73300796,+	73300779	p1@2010320M18Rik	[2010320M18Rik]	2010320M18Rik			2010320M18Rik	40.3564	233.006	26.9313	30.4304	64.2486	44.6583			20.28	67.8237	0	5.55933	65.9816	12.5698	439.63	172.214	611.845	-0.401535	0.719169	-1.85054	-1.77797		-0.0394315	2.6723	1.71719	1.82261	3.70556	-0.849695	1.98837	-1.10502	-0.0665274	0	-	-		-	-	-	-	-	-
chr9:64808653..64808698,+	64808679	p1@2010321M09Rik	[2010321M09Rik]	2010321M09Rik			2010321M09Rik	11.0063	79.496	166.076	11.0656	34.729	227.544			1.014	74.9631	41.4687	11.1187	30.885	77.2142	529.917	236.664	766.581		0.453134	-1.18317		0.888865	-1.2657	4.41859	6.27116	4.50591	3.2245	0.0873195	-3.04666	0.0911197	0.0215153	2	ENSMUST00000170517|ENSMUST00000037504	427|746	586.5	>1|ACGGCCCTTAAGTTCCGGCTATGGCGCGCGGACGGAAGGTTTAAGCGGACGGACAGAGGCTGGAGATGGGCTCCGGTTTTGTGGCTAAGCCCAGACTGCTTGAGTGAAACAGCCTTCAGGGACGTTCCATTCTTTCGTTTATCCCAGTGCTTACAACCCAAAAACAAAATTGGATTGCCACAAGTCGGCCACGGCTGAGGAAGTGCACTCGGGCCCTGACACAAATGCATCAGTCAGGAGAAAGAGCCAGCTTCTCAGGTGTCTTCAGAGAAGGCCAGACTGACAGCTGCGGTCACCCATTGCAGTGCTAGCAGCAATTTCATGGACTGGAAGTGCTTGTTGGTACTTGATCCAGAAAACTGTTTCTCAATCTCTTAAGAGCATTTCTCTGGTTGT…	-	|	64812188|64812188	-	-
chr7:30033394..30033443,-	30033411	p1@2200002D01Rik	[2200002D01Rik]	2200002D01Rik			2200002D01Rik	36.6876	424.892	201.984	431.558	286.514	119.089			3.042	29.7473	15.9495	3.70622	63.1739	55.6661	1500.73	171.285	1672.01	3.53833	-0.75973	-0.567674		1.77166	1.0739	4.07644	3.70516	-0.089382	4.82641	-4.16582	1.12125	0.335043	1.32133	1	ENSMUST00000032808	15	15	>1|CCGGCCATCCAGACTGGTCACCGCC|	Inr	-	30032612	-	-
chr4:106850901..106850943,-	106850924	p1@2210012G02Rik	[2210012G02Rik]	2210012G02Rik			2210012G02Rik	29.3501	224.782	565.557	85.7584	74.6673	425.317			10.14	116.609	456.156	1.85311	203.56	287.309	1405.43	1075.63	2481.06	1.53093	-0.410713	-1.58355		-0.665996	0.801141	4.72758	5.75163	2.53659	7.70609	-2.19099	1.95446	-0.484458	-0.24226	4	ENSMUST00000058585	146	146	>1|CGGAAGAAGTGTACAAATAGTTACAACGCGCGGCCCGGGTGGAGGTCCCGAGGAGTCAAGAGACCAAACAGCGTAGGCAGGCTGATTTTCCCGTTTCACCCTGTTTCTTGAATAGAATACTCCTCAAGCACCTGAAGGTAGGCGGAGCCCCCAGCA|	-	-	106812215	ENSMUST00000057043	124	124
chr4:106850945..106850960,-	106850951	p2@2210012G02Rik	[2210012G02Rik]	2210012G02Rik			2210012G02Rik	1.83438	52.0836	80.7938	11.0656	10.4187	155.241			3.042	20.2281	54.2283	9.26555	60.3662	59.2574	311.437	206.388	517.824		0.937928	-2.26781		0.126831	1.55405	5.83633	4.40342	3.84466	3.62067	-1.99168	-0.782741	0.390361	0.7302	4	ENSMUST00000058585	173	173	>1|GCGGGTCACCAGCGAGGAACTGGGCCCCGGAAGAAGTGTACAAATAGTTACAACGCGCGGCCCGGGTGGAGGTCCCGAGGAGTCAAGAGACCAAACAGCGTAGGCAGGCTGATTTTCCCGTTTCACCCTGTTTCTTGAATAGAATACTCCTCAAGCACCTGAAGGTAGGCGGAGCCCCCAGCA|	-	-	106812215	ENSMUST00000057043	151	151
chr11:5662124..5662185,+	5662139	p1@2210015D19Rik	[2210015D19Rik]	2210015D19Rik			2210015D19Rik	163.26	241.229	121.191	185.349	123.288	176.506			30.42	90.4316	31.899	35.2091	162.848	8.9784	1010.82	359.786	1370.61	0.182548	0.540583	-0.965523	0.207751	-1.77323	0.845096	1.14807	1.99006	0.692248	2.27078	-0.455822	0.280724	-0.115659	0.437466	0	-	-		-	-	-	-	-	-
chr5:115392185..115392221,+	115392208	p1@2210016L21Rik	[2210016L21Rik]	2210016L21Rik			2210016L21Rik	73.3752	808.666	974.014	315.37	545.245	635.849			41.574	276.054	261.572	94.5086	258.311	296.287	3352.52	1228.31	4580.83	2.09617	-0.614866	-0.56821	1.17513	0.179467	-0.0956649	4.59322	3.67694	1.90333	2.54661	-2.68989	-1.13033	-0.31059	0.16426	1	ENSMUST00000031538	8	8	>1|CCCTTGCGGCATCCCAGG|	-	-	115392216	-	-
chr7:105805040..105805110,-	105805078	p1@2210018M11Rik	[2210018M11Rik]	2210018M11Rik			2210018M11Rik	25.6813	148.027	309.71	33.1968	119.815	259.443			9.126	58.3046	41.4687	9.26555	71.5971	59.2574	895.873	249.019	1144.89	0.364074	-0.255046	-0.30391		0.509805	0.294011	4.12948	3.38086	3.4944	3.74962	-0.635085	0.368763	-0.228778	0.362199	1	ENSMUST00000038359	135	135	>1|CTGTCGCCATCTTGCCCCTTCTGAGGCACCGCAAACAAACCTAATTCCTGGTGTCCCCTAGTCTTGGCGGAGGAGCCTTTTAGATGAGCCCCGAAAGGCCGGGCAGGGAGGACAAGCTCTTTGGGGCTACCAGACAGAAGCAGCA|	-	-	105739199	-	-
chr7:105805302..105805323,-	105805314	p2@2210018M11Rik	[2210018M11Rik]	2210018M11Rik			2210018M11Rik	18.3438	145.286	251.358	8.2992	17.3645	61.6709			9.126	41.6462	0	1.85311	25.2696	23.3438	502.323	101.239	603.561	-1.09865	-2.0183	-3.02868			-0.709733	4.3975	2.13039	3.17615	4.38348	-1.22135	2.25308	-2.24195	-0.00862609	0	-	-		-	-	-	-	-	-
chr13:77274774..77274844,+	77274811	p1@2210408I21Rik	[2210408I21Rik]	2210408I21Rik			2210408I21Rik	16.5094	98.6847	121.191	63.6272	97.2411	82.9368			8.112	121.369	79.7475	24.0904	124.944	57.4618	480.19	415.724	895.914	1.9146	-0.544463	-0.0211525	1.51368	-0.469355	0.0417137	3.69556	4.54912	1.49441	2.89493	-2.20115	-1.65419	0.044498	-0.0189179	1	ENSMUST00000168779	81	81	>1|AGCGGTCGCCAGGGCTGCCTGAGATGCCGACTATTTGGTTCTGGCCAGCGCGTCAGGCCCTTGCAGGATCAGCGCCATAGACGGAGATTGA|	-	-	77314114	-	-
chr2:150434238..150434297,-	150434279	p1@2310001A20Rik	[2310001A20Rik]	2310001A20Rik			2310001A20Rik	36.6876	87.7197	736.121	105.123	281.305	1560.91			45.63	109.47	567.802	40.7684	325.696	1122.3	2807.87	2211.67	5019.54	1.50603	1.08386	1.67552	-0.160667	0.982371	1.56863	4.47035	3.87702	4.12484	5.13337	-0.345512	1.25635	1.17774	1.04173	1	ENSMUST00000046399	65	65	>1|GCCAGGGAGTAGTTCTGAAACCCGCGTTGCTGAGTGTCAAGGCGCTGTTGGAGGTGTCAGTGGAGAGGCGGCAGA|	-	-	150409714	-	-
chr2:180444925..180444979,+	180444969	p2@2310003C23Rik	[2310003C23Rik]	2310003C23Rik			2310003C23Rik	12.8407	208.334	116.702	27.664	270.886	148.861			2.028	161.825	57.4182	25.9435	130.559	70.0315	785.288	447.806	1233.09	1.07802	0.349803	0.377986	3.38685	0.284252	-0.308665	4.60892	6.44168	3.89931	2.92686	-0.709605	-3.51482	0.404579	0.0338387	1	-	-		-	-	-	-	ENSMUST00000029090	98	98
chr2:121282814..121282863,+	121282851	p1@2310003F16Rik	[2310003F16Rik]	2310003F16Rik			2310003F16Rik	1410.64	23059.3	15665	7223.07	25452.9	7764.16			945.048	11562.2	6558.43	2905.68	8562.17	5613.3	80575.1	36146.8	116722	2.35585	-1.0126	0.142474	1.6199	-0.224485	-0.433341	4.77833	4.26038	2.20116	2.28625	-2.57717	-1.97412	0.0109256	-0.158567	2	-	-		-	-	-	-	-	-
chr2:139996377..139996437,+	139996401	p1@2310003L22Rik	[2310003L22Rik]	2310003L22Rik			2310003L22Rik	9.1719	372.809	628.396	82.992	194.482	116.962			23.322	154.686	118.026	20.3842	120.732	161.611	1404.81	598.762	2003.58	3.10977	-2.42063	-0.937028	-0.189882	0.451777	-0.356221	6.69444	3.51965	1.90158	3.75952	-4.79286	0.239865	-1.35592	0.0322041	1	ENSMUST00000044825	46	46	>1|CCGTTGGCGCATGCGCCTAATAGAAACCATGCCCTGCTGTGGCGCCCGGGCTGAAG|	-	-	139996447	-	-
chr11:66866065..66866120,-	66866110	p1@2310004I24Rik	[2310004I24Rik]	2310004I24Rik			2310004I24Rik	22.0126	38.3774	94.2594	47.0288	76.4037	112.709			12.168	22.6079	0	14.8249	44.9237	70.0315	390.791	164.556	555.347	1.07807	0.256647	0.984122	0.274687	7.1402	0.975057	2.56411	0.867198	1.99618	2.91339	-0.567926	2.04619	0.609045	1.88486	1	ENSMUST00000116363	199	199	>1|GGAGGCCGCTCTTTCCTCTTGGCTCGTTGGTGACGCTGTTTGCCCTCTGGTTGTGGAGGAGTCCCGGGTCCGGCGGCTGATAGCGGGGATCCCAGCATTGCTTCAGGGATTGTTGCATTGGAGCATGATACTGTTCTTCTCCGTGCTTGGCTTTTTTGATCTATCGGGCTGCTCTCTAACACCCTTATTTAGAAGTCTGCTTGGAGGTT|	TOP	-	66851642	-	-
chr11:116060167..116060217,+	116060183	p1@2310004N24Rik	[2310004N24Rik]	2310004N24Rik			2310004N24Rik	143.082	614.038	610.442	171.517	222.265	791.089			97.344	293.903	797.475	22.2373	881.627	488.425	2552.43	2581.01	5133.44	0.260678	0.373717	-1.46398	-2.10542	-0.70673	1.58319	3.09282	3.48018	2.55923	5.91355	-0.533586	2.43337	-0.206794	0.227959	1	ENSMUST00000021130	160	160	>1|NNNNNNNNNNNNNNNTCACGTGACCGGCTGCAATCCCCGACGCTGGTACCGCCCGCCGGACGGACGAATCCCCTGCTGCGGGCCAGGGGAGGTCCCCGAGCGGCTCCTCGCCAAGGAAAGCAAGGAATCTTCAAAGTCCCTTGCCAACGATTTGGATCCTGGTGCTGACA|	-	-	116066204	-	-
chr16:16146864..16146929,-	16146882	p1@2310008H04Rik	[2310008H04Rik]	2310008H04Rik			2310008H04Rik	53.197	433.116	475.786	60.8608	526.144	486.988			41.574	341.498	207.343	11.1187	199.349	226.256	2036.09	1027.14	3063.23	0.192475	0.0335388	0.280409	-1.85649	0.125641	-0.775082	4.082	3.7067	4.04607	5.19669	-0.0359319	1.48999	0.158648	-0.434583	1	ENSMUST00000040248	13	13	>1|CAGGAAGACTGTGCACGTAGGAG|	-	-	15889722	-	-
chr7:125999163..125999209,-	125999197	p1@2310008H09Rik	[2310008H09Rik]	2310008H09Rik			2310008H09Rik	42.1907	630.486	1907.63	177.05	362.918	735.798			47.658	353.397	969.73	46.3277	376.236	971.463	3856.07	2764.81	6620.88	2.05623	-1.3738	-0.795979	-0.0404119	0.00257511	0.0902213	5.89398	4.78058	2.63018	4.84753	-3.2638	0.0669482	-1.01589	0.0242467	6	ENSMUST00000126792|ENSMUST00000106549	0|299	149.5	>1||>2|AGTCGAAGCTGACTTCCGGATCGCGGCTGCGCGGCTGCTCACGCGGGGACGCTTGGCCTGCTAGCGAACCAGGTGAGTGCGGGTGGTTTGTGCGGGGCCCCGAGGAAGGTGCTGCACGCTGGGGGAGAGGAAAACAAAGATAAGTCACCCCCAACTCGCCTGCAGCCCTCGGTTTCTCTCCAAGCCGTCCCGCCTTGGAGTAGGCATGGGGATGATCCTGGCTAGCAAGCAGCCTGCGGTTGGTGAGGGCAGCACACGCTCCTCTGGCTCGAGTCCGTGTTTTGCACCTTGTTGACTTTGAGACCTATA|	-	|	125989296|125989296	-	-
chr9:72887520..72887550,+	72887536	p1@2310009A05Rik	[2310009A05Rik]	2310009A05Rik			2310009A05Rik	18.3438	276.865	89.7709	19.3648	19.1009	6.37975			6.084	63.0642	9.5697	0	56.1546	8.9784	429.826	143.851	573.676	0.0761245	-3.71383	-3.82279			-0.166022	4.28415	3.4735	0.387225	7.03635	-3.89693	3.56285	-3.08763	-0.271405	0	-	-		-	-	-	-	-	-
chr1:140753396..140753425,-	140753402	p1@2310009B15Rik	[2310009B15Rik]	2310009B15Rik			2310009B15Rik	27.5157	224.782	26.9313	52.5616	36.4654	12.7595			13.182	86.862	15.9495	44.4746	4.21159	5.38704	381.015	170.067	551.082	0.921433	-1.04879	-2.60748	1.71683		-4.21272	3.17034	2.91665	-0.0936994	-2.15495	-3.26404	-5.0716	-1.45141	-1.09398	1	ENSMUST00000112025	9	9	>1|NNNNNNNNNNNNNNGCGCC|	-	-	140748678	-	-
chr10:79783251..79783298,-	79783272	p1@2310011J03Rik	[2310011J03Rik]	2310011J03Rik			2310011J03Rik	49.5283	361.844	502.717	260.042	444.531	1020.76			128.778	301.042	756.006	9.26555	592.431	466.877	2639.42	2254.4	4893.82	2.3807	1.0211	0.296545	-3.72663	-0.694766	0.975503	4.11199	3.03218	2.49209	6.76189	-1.61989	3.72971	0.916097	-0.150141	1	ENSMUST00000020341	216	216	>1|CGGAAGCGGTGGCGGCCGCCTAGGTTCTTGGAACGAAGATAGGCAGCGGGGTGTTCCAAGAGCAAACTGGCGCGGAGATCGAGCCAAACTCCGAGGTTCCGGGAGGAGGGAAAGCGAGACGGGGTAGGGACCTCGGCGCAGGTCTGTAAGGGGTGCGTAGGAGTTCGCGAGGTGGGCGGGCCGAGCCGAAAGTGGACCCCCAGTTAGCGCGCGCTCCACCTACAAG|	-	-	79782092	-	-
chr10:79783300..79783305,-	79783302	p2@2310011J03Rik	[2310011J03Rik]	2310011J03Rik			2310011J03Rik	3.66876	38.3774	40.3969	13.832	88.5589	89.3165			13.182	63.0642	124.406	0	49.1352	28.7309	274.15	278.518	552.669		1.13499	1.19583		-2.09528	-0.356849	4.24916	3.78015	3.6376	7.29216	-0.611558	3.512	1.21247	-1.35999	1	ENSMUST00000020341	246	246	>1|GCCGGAACGTAGTGGCGTTCAAGCAGGAAGCGGAAGCGGTGGCGGCCGCCTAGGTTCTTGGAACGAAGATAGGCAGCGGGGTGTTCCAAGAGCAAACTGGCGCGGAGATCGAGCCAAACTCCGAGGTTCCGGGAGGAGGGAAAGCGAGACGGGGTAGGGACCTCGGCGCAGGTCTGTAAGGGGTGCGTAGGAGTTCGCGAGGTGGGCGGGCCGAGCCGAAAGTGGACCCCCAGTTAGCGCGCGCTCCACCTACAAG|	-	-	79782092	-	-
chr15:99556047..99556116,+	99556105	p1@2310016M24Rik	[2310016M24Rik]	2310016M24Rik			2310016M24Rik	64.2033	592.108	210.962	94.0576	262.204	253.064			59.826	190.382	76.5576	12.9718	259.715	100.558	1476.6	700.011	2176.61	0.547354	0.261952	-1.17364	-2.16284	0.391176	0.447019	3.63451	2.14836	2.44745	4.74308	-1.18706	2.59472	-0.508923	0.191589	1	ENSMUST00000023761	182	182	>1|GCTGGCTCTCGCTTTAGTGGGCGAGTTTTCGCAGGGGGTGTCGGGTCCGGAGCGGGGCTGAGCACCAGTGGCTGAGGAGCTGCGCGTTGGTGACTGCCTCTTCCTGCCCTGCGGCGGCCGCGCGACTCTGCGAGTGGCAGACTGAGCAGGCATCGCTCTGACGCGGCCGAGTTGCAGCCTCCAGGGGAAGAC|	-	-	99558083	-	-
chr7:28338263..28338321,+	28338311	p1@2310022A10Rik	[2310022A10Rik]	2310022A10Rik			2310022A10Rik	40.3564	208.334	206.473	22.1312	189.273	223.291			21.294	191.572	108.457	50.034	78.6164	34.1179	889.859	484.091	1373.95	-0.852248	0.112711	-0.138086	1.21332	-1.65416	-1.2796	3.34555	3.7855	4.18998	1.16399	0.844434	-2.62152	-0.0663065	-0.979022	3	ENSMUST00000067386|ENSMUST00000191126|ENSMUST00000187960	137|94|137	122.667	>1|AGTGTCTGACAGTTGGCGCGACCCGGAGGGCGGGCGGGCGCCTCGTGGGGGTGCGGGCCCCAGAGTGCCAGNNNNNNNNNNNNNNNNNNNNNNNNNNNNNNNNNNNNNNNNNNNNNNNNNNNNNNNNNNNNNGTGAGCACCTGCTCN|>2|AGTGTCTGACAGTTGGCGCGACCCGGAGGGCGGGCGGGCGCCTCGTGGGGGTGCGGGCCCCAGAGTGCCAGGCTCCAGGAAGCAGGGTCAAGGCCAGGAAGACG|>3|AGTGTCTGACAGTTGGCGCGACCCGGAGGGCGGGCGGGCGCCTCGTGGGGGTGCGGGCCCCAGAGTGCCAGNNNNNNNNNNNNNNNNNNNNNNNNNNNNNNNNNNNNNNNNNNNNNNNNNNNNNNNNNNNNNGTGAG…	-	||	28341508|28345603|28341508	-	-
chr8:127187043..127187130,-	127187095	p1@2310022B05Rik	[2310022B05Rik]	2310022B05Rik			2310022B05Rik	11.0063	200.111	103.237	8.2992	217.056	161.62			8.112	94.0013	169.065	16.678	292.004	244.213	701.329	824.072	1525.4		0.644142	0.116989		0.529252	1.63005	4.72285	4.93567	5.42935	4.96553	0.7065	0.0298542	0.299425	1.02641	1	-	-		-	-	-	-	ENSMUST00000034464	13	13
chr11:59021859..59021921,+	59021888	p1@2310033P09Rik	[2310033P09Rik]	2310033P09Rik			2310033P09Rik	53.197	430.375	1000.95	273.874	1698.25	1694.89			51.714	381.955	698.588	114.893	214.791	940.936	5151.52	2402.88	7554.4	2.35323	0.759531	1.97913	1.14404	0.429389	-0.829	4.73686	4.37184	3.62862	3.3248	-1.10825	-1.04704	1.30432	0.166262	1	ENSMUST00000020719	42	42	>1|AAGTCCGACTAGAGACCGCGGGTACTGAAGGCTGTGCAGTGGCTCCAGCGCC|	-	-	59021930	-	-
chr11:59021831..59021857,+	59021849	p2@2310033P09Rik	[2310033P09Rik]	2310033P09Rik			2310033P09Rik	11.0063	106.908	489.251	80.2256	583.447	563.545			40.56	30.9371	108.457	18.5311	49.1352	274.739	1834.38	522.359	2356.74	2.8106	0.20376	2.44273	-1.10937	1.33693	0.658895	5.69641	1.76853	3.82931	4.09123	-1.8671	2.3227	1.01463	0.926182	1	ENSMUST00000020719	81	81	>1|CGAGAGTGACGTCACGGCGTGCGTCCGGAGTGCTGCGGGAAGTCCGACTAGAGACCGCGGGTACTGAAGGCTGTGCAGTGGCTCCAGCGCC|	-	-	59021930	-	-
chr1:107560446..107560497,+	107560463	p1@2310035C23Rik	[2310035C23Rik]	2310035C23Rik			2310035C23Rik	9.1719	46.6011	103.237	5.5328	53.8299	182.886			15.21	38.0765	51.0384	0	42.1159	19.7525	401.258	166.193	567.452		0.821962	0.205985		-1.34755	0.143671	3.95826	2.51206	5.29723	6.96274	1.33897	4.45069	0.605822	-0.749094	3	ENSMUST00000039173|ENSMUST00000086721|ENSMUST00000190501	221|221|221	221	>1|GGGACCAGGAAGACGCCTGCAGAGTCGGCTACTGGTGCAGCAGCGGCTGAGACGGGAGGTGCTGCTGCATACCGGGCTCCTGCCTCCCAGTCCGGCCTAGGCTCTAGGTGAGGAGAGGTGCGGTCGGCCTGGGCTGCCTAGGTGGTCGGCGGCTCTCGGGACCTAACGGGGATTCAGGCTGAGGGCCTGTCGGGCCAAGCAGGGAAGCACCCACATTCCTGACAGAATAAG|>2|GGGACCAGGAAGACGCCTGCAGAGTCGGCTACTGGTGCAGCAGCGGCTGAGACGGGAGGTGCTGCTGCATACCGGGCTCCTGCCTCCCAGTCCGGCCTAGGCTCTAGGTGAGGAGAGGTGCGGTCGGCCTGGGCTGCCTAGGTGGTCGGCGGCTCTCGGGA…	-	||	107560684|107560684|107560684	-	-
chr8:87550750..87550798,+	87550770	p1@2310036O22Rik	[2310036O22Rik]	2310036O22Rik			2310036O22Rik	1085.95	10446.9	6535.32	4802.47	4697.09	4378.64			496.86	3888.56	1460.97	924.702	1266.29	915.797	31946.3	8953.18	40899.5	2.1443	-0.577722	-1.15315	0.895478	-0.673537	-1.61825	3.96637	3.42719	0.918166	1.2382	-3.0482	-2.18899	-0.380616	-0.912016	1	ENSMUST00000047281	27	27	>1|CTTTCCCGACGTCCTTTGCACGGCATCTGGCCACAAA|	-	-	87550797	-	-
chr15:98364662..98364736,-	98364699	p1@2310037I24Rik	[2310037I24Rik]	2310037I24Rik			2310037I24Rik	56.8658	260.418	219.939	19.3648	210.11	225.418			40.56	79.7226	47.8485	29.6498	28.0773	21.5482	992.115	247.406	1239.52	-1.52998	0.0354214	-0.309021	-0.445587	-1.13281	-1.48914	3.06734	1.64114	4.45613	0.733397	1.38879	-0.907743	-0.23975	-1.07986	2	ENSMUST00000023727|ENSMUST00000116400	376|376	376	>1|GCCAGAGGGCAAGCTGCGCGGTGCCGCGCGGTGGGGGAGGTAAGATGGCGCCGTGCCGGGCGCTTCTCCTTTGCTGTTAGGCGCTGCTCGCCTTCTCTGTCAGCTCAGCGCGGCACGTCGTCTCCTGCAGCGTTGGAGCCTCTCTGGTTGCTAGGCTTTCGGGGAGCCAGGTTCTCCGGTGCCGGGAGCCGTGGGACAAGATGGCGCTTGTAGGACGACGGCCAAGGCGCTCGGGTCGGGGCTGTGAGCGCTGAGGCGGCCAGGGACAAAGGCGGCGAGCCGGGGCGTGGGGGCGGGGCGTGCCGCGCCGTTGCAGTGGTGCCGCGTGGGACAGGCGCCGCGCTTCCGGTCTGCTGCTGCGGAGATTCGGCCAACGTGGTTTTGGC|>2|GCCAGA…	-	|	98349852|98349852	-	-
chr12:88288381..88288431,+	88288407	p2@2310044G17Rik	[2310044G17Rik]	2310044G17Rik			2310044G17Rik	3.66876	46.6011	58.3511	30.4304	67.7215	110.582			5.07	20.2281	63.798	24.0904	58.9623	32.3222	317.355	204.471	521.826	2.89134	0.916489	0.534465	2.14235	-0.9701	1.52038	4.66083	3.92365	2.53128	1.90015	-2.12955	-2.02349	0.939191	0.371061	4	ENSMUST00000186499	8	8	>1|TGCGCCTGCTAACCCGCC|	-	-	88288415	ENSMUST00000038369	52	52
chr12:88288319..88288380,+	88288345	p1@2310044G17Rik	[2310044G17Rik]	2310044G17Rik			2310044G17Rik	36.6876	109.65	125.679	69.16	263.94	280.709			12.168	57.1147	22.3293	0	186.714	57.4618	885.826	335.788	1221.61	0.905509	1.15617	1.26348		1.34421	1.70018	2.66485	2.6578	2.96825	8.93473	0.303402	6.27693	1.17262	1.40941	4	ENSMUST00000038369|ENSMUST00000187814|ENSMUST00000186499	114|51|70	78.3333	>1|GGGATAGCTCGAGACCCGGCGAATACCAGGTTGTCATGGAGTCGTGGGGACCGGCTCGCGCATGCGCCTGCTAACCCGCCGGGCTGGTCATGGAGCGGCGACCCTGGCCCTTAGAGTAATCCAT|>2|GGGATAGCTCGAGACCCGGCGAATACCAGGTTGTCATGGAGTCGTGGGGACCGGCTCGCGC|>3|GGGATAGCTCGAGACCCGGCGAATACCAGGTTGTCATGGAGTCGTGGGGACCGGCTCGCGCATGCGCCTGCTAACCCGCC|	-	||	88293703|88288396|88288415	-	-
chr8:72663586..72663633,+	72663609	p1@2310045N01Rik,p1@Mef2b	[2310045N01Rik, Mef2b]	2310045N01Rik, Mef2b	2310045N01Rik		2310045N01Rik	253.144	1211.63	193.007	395.595	1040.13	416.81			253.5	926.924	146.735	227.933	350.966	168.794	3510.32	2074.85	5585.17	0.64304	1.10873	-0.220083	-0.15306	0.201406	-1.39984	2.46983	2.08031	1.87952	1.18746	-0.590311	-0.892844	0.160204	-0.827404	2	ENSMUST00000163756	84	84	>1|CTTCCGGTTTCTGGGCTCTGCTGGCTGCCTTCACTATGGAAGAACCTGAGATGCAGCTGAAGGGAAAGAAAGCCGCTCTGCACAGCTACCCACG|	-	-	72688149	ENSMUST00000002418	25	25
chr7:138506201..138506239,-	138506208	p1@2310057M21Rik	[2310057M21Rik]	2310057M21Rik			2310057M21Rik	528.301	342.655	1144.58	204.714	163.226	1641.72			123.708	143.977	440.206	38.9153	641.566	676.971	4025.2	2065.34	6090.54	-1.3656	0.520203	-1.06758	-1.65593	0.620343	2.15188	1.49232	2.2349	3.13716	5.06459	1.64484	2.82969	-0.00420877	0.938816	2	ENSMUST00000059438	24	24	>1|AGGTTCCGACGCCGCCTGGGTTGGAGGAGACAGA|	-	-	138487083	-	-
chr7:138506241..138506251,-	138506246	p3@2310057M21Rik	[2310057M21Rik]	2310057M21Rik			2310057M21Rik	84.3815	38.3774	399.48	66.3936	20.8374	442.329			18.252	17.8483	105.267	1.85311	133.367	131.085	1051.8	407.672	1459.47	-0.343582	0.146822	-0.865549		0.315106	2.86708	2.36859	2.72074	2.79315	6.81502	0.424561	4.09428	0.0200653	0.911245	2	ENSMUST00000059438	62	62	>1|TCCCCTGGGCACTGAAGGAAACGCAAGCTCTGCGAGAGAGGTTCCGACGCCGCCTGGGTTGGAGGAGACAGA|	-	-	138487083	-	-
chr8:119445308..119445351,-	119445334	p1@2310061C15Rik	[2310061C15Rik]	2310061C15Rik			2310061C15Rik	102.725	699.017	242.381	91.2912	241.366	102.076			35.49	461.677	95.697	37.0622	306.042	89.784	1478.86	1025.75	2504.61	-0.169368	-1.24356	-1.53215	0.0616853	-0.0915215	-0.59236	3.18977	3.95427	1.90574	3.39934	-1.28404	-0.554937	-1.26312	-0.453257	3	ENSMUST00000148235|ENSMUST00000078589|ENSMUST00000128304	111|111|111	111	>1|ATGCGCGGAGCGTCGGTGCTTGCAAGTCCTAAGGGAGCTGCGGGCTCCGTGTCGGTGACTTCTCTTTCTGTGCTTCTTGTAGGGGCTGAGTGACGGTCTGCTCCTACTCGCCCTCCTAACG|>2|ATGCGCGGAGCGTCGGTGCTTGCAAGTCCTAAGGGAGCTGCGGGCTCCGTGTCGGTGACTTCTCTTTCTGTGCTTCTTGTAGGGGCTGAGTGACGGTCTGCTCCTACTCGCCCTCCTAACG|>3|ATGCGCGGAGCGTCGGTGCTTGCAAGTCCTAAGGGAGCTGCGGGCTCCGTGTCGGTGACTTCTCTTTCTGTGCTTCTTGTAGGGGCTGAGTGACGGTCTGCTCCTACTCGCCCTCCTAACG|	-	||	119413672|119413672|119413584	-	-
chr17:36034287..36034314,-	36034294	p1@2310061I04Rik	[2310061I04Rik]	2310061I04Rik			2310061I04Rik	287.998	93.2022	1050.32	1554.72	340.344	1639.6			81.12	19.0382	1039.91	24.0904	224.618	161.611	4966.18	1550.39	6516.56	2.43048	0.642266	1.86296	-1.73083	-2.68209	3.52631	1.98748	3.69824	0.348705	3.97516	-1.63878	0.276913	1.30372	-1.47317	1	ENSMUST00000148721	88	88	>1|TCCCTCCTTTCCCCTTCACGAAGCCGGCTCCGGGGCGCGCTGCCCGGCGAGGAGACGGAGACGGGACGCGGGAGGCGCCCGTTCACTCCCGGAACACC|	TOP	-	36029797	-	-
chr17:36034024..36034086,-	36034046	p2@2310061I04Rik	[2310061I04Rik]	2310061I04Rik			2310061I04Rik	126.572	52.0836	143.633	80.2256	50.357	227.544			47.658	67.8237	156.305	1.85311	144.598	75.4186	680.416	493.656	1174.07	-0.65455	0.661911	-0.0481666	-4.35513	-1.04645	1.08657	0.626801	2.2217	1.78607	6.55017	1.15927	4.32848	0.151892	-0.292167	5	ENSMUST00000148482|ENSMUST00000146451|ENSMUST00000150056|ENSMUST00000156817	300|1207|235|208	487.5	>1|NNNNNNNNNTGACCACCCGTGTGCTGCACGTGTGAGGGGCGCGGGGCCCGCTAGGGCCGGCGTTCCCGGTGAGGTCCGGGGAGCGGCTATCCCGGGTGGCCCCGGTCCCCGCCGTTCTTACCTGTGCCTGGAGGACCAGCTCTCTCCTCGACCTCTACCATTCCCCCCGCTCTGGCCCCACTCCACTCCACCGACTTCTCCATCTTTTCCTCCTCACCGGTCACTACCACCCTCACATCCTCCTACCCACCATCTTCCCCAGGCTCCTCCACCACCTCTCTCTCAGGCCCAGGCTCTCAACTCATTGAGT|>2|NNNNNNNNNTGACCACCCGTGTGCTGCACGTGTGAGGGGCGCGGGGCCCGCTAGGGCCGGCGTTCCCGGTGAGGTCCGGGGA…	-	|||	36029797|36029797|36031988|36032864	-	-
chr11:115626734..115626780,+	115626745	p1@2310067B10Rik	[2310067B10Rik]	2310067B10Rik			2310067B10Rik	22.0126	74.0135	94.2594	22.1312	95.5046	121.215			15.21	35.6967	70.1778	12.9718	7.01932	19.7525	429.137	160.828	589.965	0.00758302	0.361169	0.365602	-0.221744	-1.80316	-2.26718	2.90628	2.7594	3.26277	1.01747	0.35649	-1.74193	0.327177	-1.59513	4	ENSMUST00000093912|ENSMUST00000136720|ENSMUST00000103034|ENSMUST00000141871	228|111|228|116	170.75	>1|GGAAGGCGGCAAGCCTCCTCAGAGTTGCCCACAACGGACATGGCTGCGGCCCCTGGAGGCGGGGAGGTGAAGTGAGGAGGGGGCAGGGAGGGGTGAGGACGCGGGCGAGGAAGACCGTCCGAGGGGGCCCCGATGCTGTGACGGTGACACACTCACCGGGGTTTGTCCATGTTGGGGAGGAAGCTTCCTTCCAGGTGTGACCACATTCGTCTGGGCATGTCTGCAGTACCCTGGGCCC|>2|GGAAGGCGGCAAGCCTCCTCAGAGTTGCCCACAACGGACATGGCTGCGGCCCCTGGAGGCGGGGAGCTTCCTTCCAGGTGTGACCACATTCGTCTGGGCATGTCTGCAGTACCCTGGGCCC|>3|GGAAGGCGGCAAGCCTCCTCAGAGTTGCC…	-	|||	115638667|115638667|115638667|115638667	-	-
chr7:109054424..109054506,+	109054460	p1@2400001E08Rik	[2400001E08Rik]	2400001E08Rik			2400001E08Rik	322.851	567.437	246.87	337.501	366.391	314.734			95.316	287.953	130.786	35.2091	116.521	84.397	2155.78	750.182	2905.97	0.0639262	0.349755	-0.630381	-1.42398	-0.628927	-1.30157	1.33336	2.12944	1.01195	2.49583	-0.321406	0.366392	-0.158735	-1.12071	2	ENSMUST00000033131|ENSMUST00000193465	52|52	52	>1|AAAGGCTCCTGACGGACGCCGTCCCTCCTCGGCGCCGCCTGAGCGCCCGGCCCGACCCCGCC|>2|AAAGGCTCCTGACGGACGCCGTCCCTCCTCGGCGCCGCCTGAGCGCCCGGCCCGACCCCGCC|	-	|	109054512|109054512	-	-
chr8:112217135..112217189,-	112217142	p1@2400003C14Rik	[2400003C14Rik]	2400003C14Rik			2400003C14Rik	115.566	600.332	2549.49	127.254	529.617	1161.11			43.602	260.586	529.523	66.712	182.502	470.468	5083.38	1553.39	6636.77	0.138428	-1.13436	-0.180652	0.607874	-0.170426	-0.512663	4.76248	4.16405	3.72663	3.28133	-1.03585	-0.882717	-0.844739	-0.21205	1	ENSMUST00000034164	75	75	>1|TCGCCATTTTGGATGCCGAGCGGCTCCTCGGAAGTCGGCTTCTTCCGTTTTCACGTCCGGATCCCTCCAGGAGGAGCAGGACAAC|	-	-	112196347	-	-
chr2:172266065..172266130,+	172266081	p1@2410001C21Rik	[2410001C21Rik]	2410001C21Rik			2410001C21Rik	31.1845	178.181	641.862	74.6928	144.125	325.367			8.112	116.609	165.875	27.7966	64.5777	174.181	1395.41	557.151	1952.56	1.24682	-0.979101	-0.305065	1.71621	0.0702855	-0.847619	4.69473	5.03823	2.64397	3.07987	-2.05076	-1.95836	-0.644968	-0.124356	1	ENSMUST00000029005	89	89	>1|GGAAGTAGGTAGGGTTTCGCCAGAGACCCCGGAAGCGACGGCTTCTCGTCTTTGCTAAGGCTTCTGGTTTTTGCTACGGTTTCTGATTTCGGCTTTGGG|	-	-	172266170	-	-
chr7:51502147..51502166,+	51502156	p1@2410002F23Rik	[2410002F23Rik]	2410002F23Rik			2410002F23Rik	170.597	699.017	130.168	60.8608	527.88	293.469			210.912	590.185	70.1778	81.5368	213.387	96.9667	1881.99	1263.17	3145.16	-1.47943	1.16976	-0.404782	-1.36571	0.463653	-1.46554	2.27775	1.64429	3.74348	1.92189	1.46574	0.277599	-0.180396	-1.15166	10	ENSMUST00000055858|ENSMUST00000137702|ENSMUST00000188111|ENSMUST00000185481|ENSMUST00000146155|ENSMUST00000107949|ENSMUST00000084937|ENSMUST00000107950|ENSMUST00000107948|ENSMUST00000187524	270|255|434|421|586|1970|449|1698|1271|405	775.9	>1|GGTGGCGCGCGCCTGTGGCGATCGCGTGTGAGGTGAGGTCTGTCCCGGTGTATCTTGAAGCCACGTAGCCATCCATCATCATCTTACTGTGNNNNNNNNNNNNNNNNNNNNNNNNNNNNNNNNNNNNNNNNNNNNNNNNNNNNNNATAAACAGAGGCAGTTCCTTCAGACAACCAGGCTTCCCTCCAGGTGGTTTCTACAAACATCCTACTTCCCTTCAGCCTCTGCGACAGCATTGCTTCTAGCCCTCTTGCTATTCTTACCTTGAGACTGTGAGGGCC|>2|GGTGGCGCGCGCCTGTGGCGATCGCGTGTGAGGTGTATCTTGAAGCCACGTAGCCATCCATCATCATCTTACTGTGNNNNNNNNNNNNNNNNNNNNNNNNNNNNNNNNNNNN…	-	|||||||||	51506042|51506042|51506042|51506042|51506042|51506042|51506042|51506042|51506042|51506042	-	-
chr13:104968479..104968560,-	104968512	p1@2410002O22Rik	[2410002O22Rik]	2410002O22Rik			2410002O22Rik	588.836	1145.84	9354.13	771.826	458.422	4580.66			499.902	937.633	4631.73	53.7402	815.645	3144.24	16899.7	10082.9	26982.6	0.390119	-1.02997	-1.32071	-3.20565	-0.55877	-0.200968	4.15522	3.47648	2.70602	6.19013	-1.4492	2.71365	-0.932208	-0.596558	4	ENSMUST00000144060|ENSMUST00000141557|ENSMUST00000022224|ENSMUST00000179891	274|274|274|274	274	>1|GAAAGCTTTTGGGAAGCCGCGAATTGTCAGCAAGAAGTGGATCGTTGTAGTCAGCCTTAGTGGTTGAGGCAAGTGTGTGCTTCTGAGCTAAGGAATGGCCATGGTACAAAGATTTCACTGGGGCCGTAAAGGATTTAGTGACAAGAGAATTTAAGTCCTCACGAGCAGAAAGAAGTCGGGCGTGCGTTTGAAGCCCGATCTTCCGGGACCTGTGCTTTGCACTTTCCTTCCAGACCCGGTGAAACTTCAGCCTGCGTAGGCTGAGGTCAGAAGTGCCCGCCAAG|>2|GAAAGCTTTTGGGAAGCCGCGAATTGTCAGCAAGAAGTGGATCGTTGTAGTCAGCCTTAGTGGTTGAGGCAAGTGTGTGCTTCTGAGCTAAGGAATGGCCATGGTACA…	-	|||	104934217|104934217|104934217|104934217	-	-
chr6:49023815..49023860,+	49023843	p1@2410003K15Rik	[2410003K15Rik]	2410003K15Rik			2410003K15Rik	223.794	1132.13	309.71	434.325	224.002	157.367			46.644	129.698	143.546	98.2148	213.387	43.0963	2481.33	674.586	3155.92	0.955041	-0.974531	-2.33488	1.06619	-1.72425	0.716144	2.68495	2.53768	-0.187356	1.38034	-2.8723	-1.15734	-1.02952	0.148807	1	ENSMUST00000128616	21	21	>1|ACCTCCCCCCAGAGAAGTCGCGGCGAGAGCT|	-	-	49023864	-	-
chr3:145600968..145601027,+	145601013	p1@2410004B18Rik	[2410004B18Rik]	2410004B18Rik			2410004B18Rik	55.0314	748.359	197.496	60.8608	288.25	99.9494			31.434	167.774	25.5192	7.41244	23.8657	14.3654	1449.95	270.371	1720.32	0.144013	-0.979001	-1.37487	-2.0129	-0.807614	-2.78789	4.09101	2.60136	2.66327	2.2913	-1.42774	-0.310057	-1.15541	-2.28718	1	ENSMUST00000039571	9	9	>1|GTGGGAACCCGCGGCCGTC|	-	-	145601022	-	-
chr18:33954536..33954556,+	33954544	p1@2410004N09Rik	[2410004N09Rik]	2410004N09Rik			2410004N09Rik	1990.3	1573.47	502.717	3228.39	911.635	608.203			1117.43	826.974	194.584	1541.79	807.222	303.47	8814.72	4791.46	13606.2	0.697688	0.274558	-0.787091	0.464244	0.639834	-0.0348548	0.0609357	-0.129351	-1.08665	-0.472964	-1.14758	-0.343613	0.223579	0.310349	0	-	-		-	-	-	-	-	-
chr11:62416369..62416388,+	62416378	p1@2410006H16Rik	[2410006H16Rik]	2410006H16Rik			2410006H16Rik	1295.07	1674.9	758.564	4852.27	3035.31	1212.15			918.684	793.657	322.18	2859.35	1547.06	984.033	12828.3	7424.96	20253.2	1.90522	0.675873	0.857578	1.63751	1.60934	0.962498	0.909718	0.280346	-0.192036	-0.175895	-1.10175	-0.456241	1.2871	1.40549	0	-	-		-	-	-	-	-	-
chr17:56749112..56749138,-	56749124	p1@2410015M20Rik	[2410015M20Rik]	2410015M20Rik			2410015M20Rik	89.8846	973.141	260.336	450.923	494.888	236.051			63.882	333.169	63.798	98.2148	318.677	141.859	2505.22	1019.6	3524.82	2.32033	-0.14099	-0.974832	0.616609	1.14669	-0.0640614	3.77109	2.62611	0.696256	2.22354	-3.07484	-0.402566	-0.16308	0.277636	1	ENSMUST00000052832	34	34	>1|CGAATTACTTGTCCTTGCGCGGCGAGTGAAGCGAGAGACTAACC|	-	-	56747166	-	-
chr17:56749098..56749109,-	56749102	p2@2410015M20Rik	[2410015M20Rik]	2410015M20Rik			2410015M20Rik	12.8407	161.733	13.4656	47.0288	102.45	46.7848			2.028	57.1147	28.7091	0	144.598	34.1179	384.304	266.568	650.871	1.83297	1.7595	-0.65612		0.245101	1.33252	3.7192	5.09369	1.65554	8.48555	-2.06366	3.39186	0.0615996	1.02037	1	ENSMUST00000052832	12	12	>1|CGAGTGAAGCGAGAGACTAACC|	-	-	56747166	-	-
chr5:130371616..130371670,+	130371633	p1@2410018M08Rik	[2410018M08Rik]	2410018M08Rik			2410018M08Rik	22.0126	71.2723	40.3969	221.312	611.23	91.4431			18.252	29.7473	9.5697	183.458	61.77	50.279	1057.67	353.076	1410.74	3.30054	1.16875	3.0914	3.29426	2.33421	1.04173	2.31687	1.08634	1.66454	-0.708822	-0.652333	-1.79516	2.78446	2.34979	2	ENSMUST00000041466|ENSMUST00000077320	39|193	116	>1|GCGTTCCCGAGTTTGTTGTGTCTGGACGCTTAAGGTGCAGACACCGAGG|>2|GCGTTCCCGAGTTTGTTGTGTCTGGACGCTTAAGGTGCAGACACCGAGGATGCCACGTGGAAGCCGAATCCGCACTTCCCGCGTGACCCTTCTGGCCGGCACGTAGAAGAGGAAATAAGCNNNNNNNNNNNNNNNNNNNNNNNNNNNNNNNNNNNNNNNNNNNNNNNNNNNNNNNNNNNNNNNNNNNNNNCCGGGCCCCTCAG|	-	|	130371672|130375065	-	-
chr8:13890233..13890300,-	13890248	p1@2410022L05Rik	[2410022L05Rik]	2410022L05Rik			2410022L05Rik	64.2033	476.976	85.2823	168.75	194.482	108.456			19.266	197.522	41.4687	18.5311	81.4241	52.0747	1098.15	410.286	1508.44	1.38725	0.34499	-1.29209	-0.0546621	0.325056	-1.2733	3.1206	3.59888	0.842242	2.81579	-2.27836	-0.783086	-0.409015	-0.762502	1	ENSMUST00000033839	14	14	>1|GCGCCTGGCTGTGGGCGGCCGGGC|	-	-	13885031	-	-
chr2:112219361..112219410,+	112219389	p1@2410042D21Rik	[2410042D21Rik]	2410042D21Rik			2410042D21Rik	16.5094	304.278	300.732	49.7952	121.551	110.582			33.462	111.85	63.798	20.3842	64.5777	32.3222	903.449	326.394	1229.84	1.56409	-1.43925	-1.32027	-0.701509	-0.9701	-0.78776	5.15375	2.37479	2.20957	2.22151	-2.94418	-0.153283	-1.13907	-0.831559	1	ENSMUST00000028552	139	139	>1|NNNNNNNNNNNNNNNNNNNTGTTTGAATGGCTGTGAGTGGGGCCCGGCTGGGGATCCGAGGGACGCTCCGAGCTGCCGGGAGCGGTTCATCAGCACAGTGGCTGAGCTTGGGCGCTGCGGTACCATGAGGCGCCGGCACTTAAGAGATT|	-	-	112244331	-	-
chr17:79336464..79336523,+	79336478	p1@2410091C18Rik	[2410091C18Rik]	2410091C18Rik			2410091C18Rik	18.3438	131.58	426.412	130.021	340.344	353.013			7.098	96.3811	216.913	20.3842	158.637	312.448	1399.71	811.861	2211.57	2.79212	-0.272175	1.3677	1.45872	0.525485	0.715979	4.88937	5.36806	2.41036	4.49703	-2.47901	-0.871022	0.514271	0.616479	1	ENSMUST00000024887	26	26	>1|CGCCTCCGGGGCGGAGCCTGGCCTCGGGGTGTAGGA|	-	-	79336504	-	-
chr3:90313378..90313428,-	90313395	p1@2500003M10Rik	[2500003M10Rik]	2500003M10Rik			2500003M10Rik	409.067	1162.29	1894.17	240.677	562.609	1563.04			539.448	1661.09	1869.28	463.277	1142.75	1438.34	5831.84	7114.18	12946	-0.764007	-0.277128	-1.0461	-0.219388	-0.377964	-0.539426	2.89992	2.70913	3.14008	2.47675	0.240156	-0.232378	-0.550326	-0.418764	8	ENSMUST00000107343|ENSMUST00000001043|ENSMUST00000107344|ENSMUST00000076639|ENSMUST00000049937|ENSMUST00000107346|ENSMUST00000107342|ENSMUST00000146740	1659|1659|1373|301|301|301|1659|301	944.25	>1|TGGTGGGCCCGGCGGCCATTTTGTTTTGGACACCAAGCGGGAGTTGGCGGCGCCGGCTCTGGGGGCCCAGACGAAAGGCAGGAAAGGGCAGGCTTGACGAGCGGGAGGATCGGTCAGCTAGATACTCAACCCACAACGAGGAAGCCTCACATCCTACCGTTTAAGCATCTAAGCCAACCGCCCAGCTAGTTAACCCGAGCGGCCCGCCGTCAGCTCAGGTTAGGCCGGCCTCCGGGCCGCCCGCCGCAGCCGTGGTGGCAACCCCGGGAGGAGCGCTGGCGTCCATCTCCTTCGATTCTCGGGATTTGAAGATGGCTGCACAGTCAGCGCCGAAAGTTGTGCTAAAAAGCACCACCAAGATGTCTCTAAATGAGCGGTGAGGCAGCCAACAGCAAC…	-	|||||||	90303823|90303823|90303823|90303823|90303823|90303823|90303823|90306079	-	-
chr3:90313439..90313450,-	90313444	p4@2500003M10Rik	[2500003M10Rik]	2500003M10Rik			2500003M10Rik	40.3564	65.7898	179.542	19.3648	22.5738	208.405			20.28	35.6967	92.5071	0	61.77	84.397	536.032	294.651	830.683	-1.04035	0.214517	-1.52253		-0.131628	0.782679	2.58904	2.63079	3.5426	8.1964	0.953558	5.56561	-0.190173	-0.0226113	8	ENSMUST00000107343|ENSMUST00000001043|ENSMUST00000107344|ENSMUST00000076639|ENSMUST00000049937|ENSMUST00000107346|ENSMUST00000107342|ENSMUST00000146740	1708|1708|1422|350|350|350|1708|350	993.25	>1|GCGCACTGACGCAAGCCCGTCGGCGCCATTTTAGCCGGTCACGCTGCACTGGTGGGCCCGGCGGCCATTTTGTTTTGGACACCAAGCGGGAGTTGGCGGCGCCGGCTCTGGGGGCCCAGACGAAAGGCAGGAAAGGGCAGGCTTGACGAGCGGGAGGATCGGTCAGCTAGATACTCAACCCACAACGAGGAAGCCTCACATCCTACCGTTTAAGCATCTAAGCCAACCGCCCAGCTAGTTAACCCGAGCGGCCCGCCGTCAGCTCAGGTTAGGCCGGCCTCCGGGCCGCCCGCCGCAGCCGTGGTGGCAACCCCGGGAGGAGCGCTGGCGTCCATCTCCTTCGATTCTCGGGATTTGAAGATGGCTGCACAGTCAGCGCCGAAAGTTGTGCTAAAA…	-	|||||||	90303823|90303823|90303823|90303823|90303823|90303823|90303823|90306079	-	-
chr16:18836666..18836676,+	18836673	p1@2510002D24Rik	[2510002D24Rik]	2510002D24Rik			2510002D24Rik	27.5157	120.615	17.9542	85.7584	154.544	34.0253			17.238	65.444	15.9495	9.26555	18.2502	3.59136	440.412	129.739	570.151	1.62243	0.903709	0.356303	-0.86107		-1.81433	2.31149	2.2069	1.13218	1.19396	-1.17931	-1.01295	0.722273	-1.64909	3	ENSMUST00000055413|ENSMUST00000123146|ENSMUST00000191388	15|15|15	15	>1|CCTGTCAGTCACACGGGGCCTGGAC|>2|CCTGTCAGTCACACGGGGCCTGGAC|>3|CCTGTCAGTCACACGGGGCCTGGAC|	-	||	18836688|18836688|18836688	-	-
chr4:129277914..129277959,+	129277923	p1@2510006D16Rik	[2510006D16Rik]	2510006D16Rik			2510006D16Rik	104.56	753.842	314.198	320.902	349.026	170.127			37.518	483.095	35.0889	142.689	143.194	120.311	2012.65	961.896	2974.55	1.61317	-0.883125	-1.10982	1.91317	1.76325	-1.7508	3.34636	3.7701	0.693167	0.882638	-2.65319	-2.88746	-0.480911	-0.451665	3	ENSMUST00000102591|ENSMUST00000181579|ENSMUST00000173758	36|36|36	36	>1|GGGCTCCGCCCTCTCGCTCCCGGAAGTAGAAGGGCCTGGCGTTTTC|>2|GGGCTCCGCCCTCTCGCTCCCGGAAGTAGAAGGGCCTGGCGTTTTC|>3|GGGCTCCGCCCTCTCGCTCCCGGAAGTAGAAGGGCCTGGCGTTTTC|	TOP|TOP|TOP	||	129277959|129277959|129277959	-	-
chr10:80783932..80783992,+	80783955	p1@2510012J08Rik	[2510012J08Rik]	2510012J08Rik			2510012J08Rik	166.929	1258.23	2414.84	177.05	1354.43	3493.98			122.694	521.172	1065.43	72.2713	325.696	597.961	8865.45	2705.22	11570.7	0.0846763	0.532852	0.106249	-0.759491	-0.832778	-0.677401	4.45556	3.68739	4.77137	3.6667	0.315802	-0.0206894	0.388106	-0.778982	1	-	-		-	-	-	-	-	-
chr6:13821477..13821487,-	13821482	p1@2610001J05Rik	[2610001J05Rik]	2610001J05Rik			2610001J05Rik	12.8407	137.062	67.3282	22.1312	46.8841	25.519			43.602	109.47	210.533	1.85311	186.714	61.0531	311.765	613.225	924.991	0.762483	-1.38232	-1.53761	-4.2282	-1.77757	0.767579	3.94095	2.86142	1.68767	6.72118	-2.25328	3.85976	-1.19603	-0.541734	4	ENSMUST00000139231|ENSMUST00000155856|ENSMUST00000185219|ENSMUST00000185361	165|182|772|74	298.25	>1|GTAGTCTGGCGACACCGCCCTGCTCTCCATTCCTGTAATGGCTGCTTTCGGTCCGGCTGTGTCACGAGTAACCTCTTAGCCTCAGCATCCGGAAGTTCCAAAGAGAATATTTCACGTTGGGTAGAATTACTTATACCCTTGTTTCGGCAAGTTCAGCCCTCCAGATCCTAGCATC|>2|GTAGTCTGGCGACACCGCCCTGCTCTCCATTCCTGTAATGGCTGCTTTCGGTCCGCTTCCTCTTTAAAATAGGCTGTGTCACGAGTAACCTCTTAGCCTCAGCATCCGGAAGTTCCAAAGAGAATATTTCACGTTGGGTAGAATTACTTATACCCTTGTTTCGGCAAGTTCAGCCCTCCAGATCCTAGCATC|>3|GTAGTCTGGCGACACCGCCCT…	-	|||	13820531|13820531|13820531|13820531	-	-
chr4:134066917..134066991,+	134066947	p1@2610002D18Rik	[2610002D18Rik]	2610002D18Rik			2610002D18Rik	181.604	855.267	2028.82	417.726	1469.04	2081.93			165.282	1357.66	4137.3	340.972	1333.67	2154.82	7034.38	9489.71	16524.1	1.19952	0.0372673	0.780069	1.04248	-0.940965	-0.0257149	3.98553	5.05088	3.08606	3.35297	-0.899478	-1.69791	0.372395	-0.563663	1	ENSMUST00000105866	59	59	>1|CAGTGGCGGGAGATCTGAACGCGGGTTGGCGCTAACGCCGGCTGCAGTGGTGCGCGGTGCGCGGCCGCC|	-	-	134067006	-	-
chrX:105011577..105011676,-	105011615	p1@2610002M06Rik,p1@Chmp1b	[2610002M06Rik, Chmp1b]	2610002M06Rik, Chmp1b	2610002M06Rik		2610002M06Rik	44.0251	63.0486	323.175	55.328	67.7215	176.506			26.364	127.318	315.8	42.6215	220.407	197.525	729.805	930.035	1659.84	0.326369	-0.870745	0.102366	0.682734	-0.675613	0.789343	3.11861	4.04557	2.13212	3.27851	-0.986494	-0.767062	-0.521615	-0.0276739	1	ENSMUST00000120722	127	127	>1|GTGGGCTAGGATCCCTCGAAACCCGCTACAACCGCCACCCTCCGCGCGCCCAAGCGACCCACAACTCGCGGGTCCAGCCCCTGTCCCGCGTGTTACCTGCCCCTCCCCCTCCTCCCGCCCGGTGAACTCGAGAGATC|	-	-	104983147	-	-
chr8:20020374..20020392,-	20020384	p1@2610005L07Rik,p1@6820431F20Rik	[2610005L07Rik, 6820431F20Rik]	2610005L07Rik, 6820431F20Rik	2610005L07Rik		2610005L07Rik	267.82	849.785	457.831	719.264	3302.72	1292.96			521.196	1081.61	165.875	824.634	1761.85	619.51	6890.39	4974.67	11865.1	1.42357	1.49678	1.95786	0.661419	1.89785	0.703653	2.28547	1.25832	2.67484	1.52939	0.389374	0.271069	1.75398	0.857915	0	-	-		-	-	-	-	-	-
chr16:43890009..43890043,+	43890026	p1@2610015P09Rik	[2610015P09Rik]	2610015P09Rik			2610015P09Rik	3.66876	21.9299	80.7938	0	166.699	119.089			4.056	5.94945	25.5192	3.70622	23.8657	66.4402	392.18	129.537	521.717		0.556864	2.89807		1.3633	1.9176	4.63001	2.81082	9.16132	4.43219	4.53131	1.62137	1.42131	1.39151	4	ENSMUST00000122014|ENSMUST00000178400|ENSMUST00000151183	77|77|355	169.667	>1|AGTTGTCTCTGTTGTGGCCGAAGTCTAGGCCCGAGAGTGCAAAACGTGCTGCTGGCGCCCCAGGGAGGGTCCGCCTCAAAGAAGAAG|>2|AGTTGTCTCTGTTGTGGCCGAAGTCTAGGCCCGAGAGTGCAAAACGTGCTGCTGGCGCCCCAGGGAGGGTCCGCCTCAAAGAAGAAG|>3|AGTTGTCTCTGTTGTGGCCGAAGTCTAGGCCCGAGAGTGCAAAACGTGCTGCTGGCGCCCCAGGGAGGGTCCGCCTCAAAGAAGAAGATGGAGCTGAGTCGCTGGAAACGGTTATCAAGGAAGCTGAATCTCAAGCTCAGGAACTAGTCAATGACTGGCTGGACAACAAACTTAAACAAGAATTAGCAAGTGATGGAGAAGGGGAAAGCACTGT…	-	||	43890103|43890103|43906992	ENSMUST00000132859	285	285
chr17:24665188..24665209,+	24665195	p1@2610019E17Rik	[2610019E17Rik]	2610019E17Rik			2610019E17Rik	1515.2	594.85	579.022	697.133	97.2411	125.468			1247.22	560.438	998.439	227.933	532.064	206.503	3608.91	3772.6	7381.51	-1.11944	-2.2018	-2.6067	-2.44945	-2.27074	-0.0748858	-0.368093	0.321675	-1.64407	1.69394	-1.27598	1.37226	-1.54713	-1.53723	0	-	-		-	-	-	-	-	-
chr12:101121611..101121638,-	101121630	p1@2610021K21Rik	[2610021K21Rik]	2610021K21Rik			2610021K21Rik	5.50314	197.369	130.168	19.3648	121.551	63.7975			3.042	142.787	51.0384	5.55933	119.328	61.0531	537.754	382.808	920.562		-1.02307	-0.69706		0.256184	-0.257935	5.772	5.77776	3.22584	4.89974	-2.54615	-0.878022	-0.700734	-0.0821639	1	ENSMUST00000046485	65	65	>1|GCGAGGCCGCAGTGGCTGGTCTGTGTTCTCGCTGCAGCGGAGGAGACGCCTGGCTTGGTCTCCGTGTCGGTGGCG|	-	-	100957234	-	-
chrX:102275103..102275142,+	102275113	p1@2610029G23Rik	[2610029G23Rik]	2610029G23Rik			2610029G23Rik	396.226	5921.08	6728.33	1139.76	2191.4	1509.87			65.91	1088.75	912.311	153.808	720.182	678.767	17886.7	3619.73	21506.4	1.52314	-2.15545	-1.4338	1.21634	-0.426338	-0.595899	4.99484	4.91358	1.69886	3.18097	-3.29598	-1.73261	-1.43009	-0.41257	2	ENSMUST00000033577|ENSMUST00000119477	39|39	39	>1|GCAACAGGTCACTTCCGGGACGAGAAAGCCGCACTTACCTAGCGGCGAC|>2|GCAACAGGTCACTTCCGGGACGAGAAAGCCGCACTTACCTAGCGGCGAC|	InrAC|InrAC	|	102275152|102275152	-	-
chrX:102275074..102275093,+	102275080	p2@2610029G23Rik	[2610029G23Rik]	2610029G23Rik			2610029G23Rik	23.8469	833.337	965.037	30.4304	180.591	197.772			2.028	154.686	41.4687	1.85311	64.5777	89.784	2231.01	354.397	2585.41	0.345285	-2.28385	-2.20305		1.10516	-1.25376	6.20721	6.28152	3.61458	6.04027	-2.59263	-0.241254	-2.15489	-0.342322	2	ENSMUST00000033577|ENSMUST00000119477	72|72	72	>1|TATTGCTTTCAGTTAACTGTGAAAGCAGCGCGCGCAACAGGTCACTTCCGGGACGAGAAAGCCGCACTTACCTAGCGGCGAC|>2|TATTGCTTTCAGTTAACTGTGAAAGCAGCGCGCGCAACAGGTCACTTCCGGGACGAGAAAGCCGCACTTACCTAGCGGCGAC|	-	|	102275152|102275152	-	-
chr4:21694320..21694364,-	21694346	p1@2610029I01Rik	[2610029I01Rik]	2610029I01Rik			2610029I01Rik	16.5094	202.852	89.7709	38.7296	64.2486	51.038			5.07	155.876	73.3677	0	77.2125	43.0963	463.148	354.622	817.771	1.20561	-0.808624	-1.65106		-0.760737	-1.0088	4.1071	5.3662	1.56145	7.91658	-2.54565	2.55038	-1.0028	-0.958788	1	ENSMUST00000029915	81	81	>1|GAGCCTGGACAGCGCCTGTAGGAAGAAGAGCAGGAAGGAGCCGAGGAAAGGAAGTGGTCAGCAGCCCCGGGGTCCCAGAGAGCCCATTGTG|	-	-	21685549	-	-
chr4:21694262..21694289,-	21694271	p2@2610029I01Rik	[2610029I01Rik]	2610029I01Rik			2610029I01Rik	62.3689	334.432	107.725	157.685	269.149	91.4431			34.476	183.243	66.9879	55.5933	318.677	46.6877	1022.8	705.665	1728.47	1.33119	-0.235221	-0.312781	0.681463	-0.516219	0.796668	2.81577	2.8417	1.19076	2.70541	-1.62501	-0.136293	0.0387593	0.56338	1	ENSMUST00000029915	6	6	>1|CAGAGAGCCCATTGTG|	-	-	21685549	-	-
chr7:87080144..87080257,-	87080168	p1@2610034B18Rik	[2610034B18Rik]	2610034B18Rik			2610034B18Rik	16.5094	189.146	309.71	63.6272	324.716	410.431			7.098	91.6215	156.305	12.9718	182.502	208.299	1314.14	658.798	1972.94	1.9146	0.405652	0.778091		0.413142	0.990252	4.87566	5.03106	3.52	4.86027	-1.35566	-0.170788	0.631697	0.661867	1	ENSMUST00000048731	39	39	>1|CCTACGCGCCGGTTGCTTCCTGGAGCCACAGGGCCTCGGCGTGGGGAAA|	-	-	87071727	-	-
chr16:90727574..90727631,-	90727583	p1@2610039C10Rik	[2610039C10Rik]	2610039C10Rik			2610039C10Rik	45.8595	556.472	269.313	58.0944	187.536	99.9494			57.798	178.483	169.065	27.7966	265.33	59.2574	1217.22	757.731	1974.96	0.337898	-1.42549	-1.56659	-1.04282	-1.50465	0.570679	4.1557	2.57777	2.29716	3.52213	-1.85854	0.944357	-1.33346	-0.201738	1	ENSMUST00000099554	67	67	>1|CGGCAAATTCGTATGTCATGGCTGCTTCCTGGTCTCTGGGATGTTCCTTGACCGCTTGTGGTTAAAACCGCCTGGCT|	-	-	90720142	-	-
chr17:95234108..95234144,-	95234128	p1@2610044O15Rik	[2610044O15Rik]	2610044O15Rik			2610044O15Rik	31.1845	189.146	121.191	30.4304	189.273	121.215			4.056	69.0136	6.3798	5.55933	71.5971	44.892	682.439	201.498	883.937	-0.0347499	0.000291671	0.000966958		2.722	0.052645	3.29431	4.05814	3.32976	4.27107	0.0354541	0.212937	-0.00254284	0.616192	0	-	-		-	-	-	-	-	-
chr17:95234083..95234099,-	95234090	p2@2610044O15Rik	[2610044O15Rik]	2610044O15Rik			2610044O15Rik	12.8407	65.7898	58.3511	132.787	322.979	125.468			9.126	65.444	15.9495	59.2995	81.4241	7.18272	718.217	238.426	956.642	3.32064	1.09792	2.28681	2.63513		0.313048	3.22388	3.08874	1.75201	0.575402	-1.47187	-2.51334	2.08112	0.705306	0	-	-		-	-	-	-	-	-
chr9:95412276..95412311,-	95412303	p1@2610101N10Rik	[2610101N10Rik]	2610101N10Rik			2610101N10Rik	324.685	1532.35	2814.32	448.157	1000.19	2617.82			239.304	1029.25	3394.05	138.983	2282.68	1948.31	8737.53	9032.59	17770.1	0.46435	-0.104397	-0.61522	-0.781764	-0.800626	1.14875	3.74074	4.20536	3.01172	4.923	-0.729028	0.717643	-0.200146	-0.0935018	4	ENSMUST00000079659|ENSMUST00000185515|ENSMUST00000190019	24|26|29	26.3333	>1|TGCTGCCTCCGCTGAAGGAGGAGCAAAGCTCAAG|>2|TGCTGCCTCCGCTGAAGGAGGAGCAAAGCTCAAGAT|>3|TGCTGCCTCCGCTGAAGGAGGAGCAAAGCTCAAGATGGC|	-	||	95361823|95393526|95394144	ENSMUST00000078374	24	24
chr9:95412316..95412327,-	95412321	p2@2610101N10Rik	[2610101N10Rik]	2610101N10Rik			2610101N10Rik	5.50314	123.356	228.916	11.0656	32.9925	182.886			18.252	47.5956	133.976	31.5029	169.868	161.611	584.719	562.805	1147.52		-0.323079	-1.88675	0.771157	0.269637	1.82467	5.87687	3.27939	4.22565	3.37482	-1.65123	0.0954299	-0.655553	0.859551	4	ENSMUST00000079659|ENSMUST00000078374|ENSMUST00000185515|ENSMUST00000190019	42|42|44|47	43.75	>1|TGCTCGACTCACCCGCGCTGCTGCCTCCGCTGAAGGAGGAGCAAAGCTCAAG|>2|TGCTCGACTCACCCGCGCTGCTGCCTCCGCTGAAGGAGGAGCAAAGCTCAAG|>3|TGCTCGACTCACCCGCGCTGCTGCCTCCGCTGAAGGAGGAGCAAAGCTCAAGAT|>4|TGCTCGACTCACCCGCGCTGCTGCCTCCGCTGAAGGAGGAGCAAAGCTCAAGATGGC|	InrAC|InrAC|InrAC|InrAC	|||	95361823|95361823|95393526|95394144	-	-
chr9:41389414..41389434,+	41389421	p1@2610203C20Rik	[2610203C20Rik]	2610203C20Rik			2610203C20Rik	212.788	222.041	197.496	118.955	76.4037	72.3039			153.114	160.635	98.8869	38.9153	206.368	30.5266	899.987	688.446	1588.43	-0.836334	-1.44338	-1.53294	-1.96248	-1.67955	0.360439	0.977711	0.759324	0.320851	2.59046	-0.65686	1.83113	-1.2387	-0.58033	0	-	-		-	-	-	-	-	-
chr4:10801685..10801754,+	10801738	p1@2610301B20Rik	[2610301B20Rik]	2610301B20Rik			2610301B20Rik	12.8407	249.453	76.3052	16.5984	90.2953	144.608			7.098	109.47	98.8869	1.85311	77.2125	61.0531	590.1	355.574	945.674	0.358031	0.917847	-1.46097		-0.691224	-0.500889	4.61211	4.78075	3.7832	5.88194	-0.828913	1.10119	-0.428274	-0.61894	2	ENSMUST00000080517|ENSMUST00000101504	23|23	23	>1|GAGGCTCGGGAGAGAAAGACGCGTCTGTTCAAG|>2|GAGGCTCGGGAGAGAAAGACGCGTCTGTTCAAG|	-	|	10801761|10801761	-	-
chr14:70553492..70553540,-	70553512	p1@2610301G19Rik	[2610301G19Rik]	2610301G19Rik			2610301G19Rik	45.8595	98.6847	417.435	49.7952	142.389	582.684			18.252	36.8866	264.762	16.678	103.886	253.191	1336.85	693.655	2030.5	0.117556	0.480674	0.526703	-0.126483	-0.0643446	1.48133	3.47816	4.01014	3.85063	4.37962	0.372463	0.36948	0.463082	0.224145	1	-	-		-	-	-	-	ENSMUST00000035612	116	116
chr5:115273470..115273484,-	115273475	p1@2610524H06Rik	[2610524H06Rik]	2610524H06Rik			2610524H06Rik	25.6813	145.286	35.9083	80.2256	59.0392	25.519			18.252	51.1653	3.1899	29.6498	15.4425	10.7741	371.659	128.474	500.133	1.62449	-0.484703	-1.29194	0.685102		-1.69632	2.7949	1.54858	0.0754248	-0.174411	-2.71948	-1.72299	-0.3273	-0.375179	2	ENSMUST00000140374|ENSMUST00000100850	22|22	22	>1|TCCCCTCGCTCCTTGCAGCGCGGGTTTCAGTG|>2|TCCCCTCGCTCCTTGCAGCGCGGGTTTCAGTG|	-	|	115259254|115272447	-	-
chr16:57606929..57606992,-	57606979	p1@2610528E23Rik	[2610528E23Rik]	2610528E23Rik			2610528E23Rik	190.776	1535.1	2311.6	478.587	1689.56	2424.31			104.442	894.797	1878.85	552.227	1043.07	1768.74	8629.93	6242.13	14872.1	1.32464	0.0686654	0.13828	2.39697	-0.0871009	0.22109	4.33008	4.72438	3.10231	2.34712	-1.22777	-2.37726	0.185793	0.225048	1	ENSMUST00000114371	141	141	>1|CTGTGACGTCATCTCCAGTGGCGCGGGCGACGGAGTTCCTTGGTTTTTCCGCGTGTAGCGTTGCTAACGCCGCCAGTGAAGCTGAGCCCAGGAGCGCGAGCGGCCGCCTTGCTTTCATCTGGTTGTCAGTTCGCGTCCGGGTCTCACGGGG|	-	-	57302311	-	-
chr16:57606909..57606924,-	57606915	p2@2610528E23Rik	[2610528E23Rik]	2610528E23Rik			2610528E23Rik	117.4	666.122	978.503	201.947	764.037	1065.42			70.98	379.575	606.081	196.43	617.7	861.926	3793.43	2732.69	6526.12	0.779978	0.122713	0.197718	1.46207	0.507701	0.70179	3.80256	3.7862	3.17619	2.90997	-0.626366	-0.876236	0.205188	0.66534	1	ENSMUST00000114371	77	77	>1|TAACGCCGCCAGTGAAGCTGAGCCCAGGAGCGCGAGCGGCCGCCTTGCTTTCATCTGGTTGTCAGTTCGCGTCCGGGTCTCACGGGG|	-	-	57302311	-	-
chr2:106814540..106814579,-	106814553	p1@2700007P21Rik	[2700007P21Rik]	2700007P21Rik			2700007P21Rik	249.476	1055.38	1225.37	301.538	4335.91	2900.66			225.108	339.119	236.053	224.226	355.178	813.443	10068.3	2193.13	12261.5	0.27294	1.24282	2.03806	-0.00564934	1.78277	0.0666545	3.18997	1.35143	4.58261	2.37918	1.39264	1.02776	1.57475	0.799078	1	ENSMUST00000028536	190	190	>1|CCGTCCTCTCGGTTTCTGCGCGGGGCCGGCGGTGGTGTGGAAAGCCGAGCTTGGCCTGTGCAGAGACGGTGCTTCCGGAGCCCAGCGGAGACCCGTGGCAGCTCAGGTGGACCGGGCCGGGTCGGGCCGTAGGGCTGTTGACCTATCAAAGAGATTTCTAGACAAAATAAAAGAGGGGGAAATTGATAGAATCAAGGACG|	-	-	106804972	-	-
chr2:106814489..106814517,-	106814502	p2@2700007P21Rik	[2700007P21Rik]	2700007P21Rik			2700007P21Rik	209.119	622.262	781.007	257.275	2344.2	1701.27			178.464	309.371	280.711	166.78	405.717	529.726	5915.14	1870.77	7785.9	0.298342	1.1227	1.91265	-0.0974054	0.914952	0.39058	2.74346	1.72247	3.9723	2.48416	1.22884	0.761686	1.41578	0.519926	1	ENSMUST00000028536	139	139	>1|TGGCCTGTGCAGAGACGGTGCTTCCGGAGCCCAGCGGAGACCCGTGGCAGCTCAGGTGGACCGGGCCGGGTCGGGCCGTAGGGCTGTTGACCTATCAAAGAGATTTCTAGACAAAATAAAAGAGGGGGAAATTGATAGAATCAAGGACG|	-	-	106804972	-	-
chr2:106814518..106814538,-	106814530	p3@2700007P21Rik	[2700007P21Rik]	2700007P21Rik			2700007P21Rik	143.082	605.814	596.976	157.685	1689.56	1475.85			153.114	92.8114	111.647	153.808	324.293	558.457	4668.97	1394.13	6063.1	0.13974	1.30508	1.47894	0.00650415	2.31735	1.79939	3.06704	0.416018	4.32294	2.51701	1.2559	2.10099	1.30367	1.53417	1	ENSMUST00000028536	167	167	>1|GGCCGGCGGTGGTGTGGAAAGCCGAGCTTGGCCTGTGCAGAGACGGTGCTTCCGGAGCCCAGCGGAGACCCGTGGCAGCTCAGGTGGACCGGGCCGGGTCGGGCCGTAGGGCTGTTGACCTATCAAAGAGATTTCTAGACAAAATAAAAGAGGGGGAAATTGATAGAATCAAGGACG|	-	-	106804972	-	-
chr2:106814590..106814622,-	106814616	p4@2700007P21Rik	[2700007P21Rik]	2700007P21Rik			2700007P21Rik	67.8721	293.313	462.32	163.218	1710.4	1146.23			78.078	95.1912	63.798	200.136	179.695	450.716	3843.35	1067.61	4910.97	1.25973	1.309	2.54179	1.35238	2.81097	0.913098	3.46716	1.02126	4.12529	1.65286	0.658124	0.631594	1.87399	1.80659	1	ENSMUST00000028536	253	253	>1|CTTCCGCTCTAGGCTCCTCCTGGTTCCTCTCCATGGTACAAGCGGTCTCTCTAGCCGCCCTCGCCGTCCTCTCGGTTTCTGCGCGGGGCCGGCGGTGGTGTGGAAAGCCGAGCTTGGCCTGTGCAGAGACGGTGCTTCCGGAGCCCAGCGGAGACCCGTGGCAGCTCAGGTGGACCGGGCCGGGTCGGGCCGTAGGGCTGTTGACCTATCAAAGAGATTTCTAGACAAAATAAAAGAGGGGGAAATTGATAGAATCAAGGACG|	-	-	106804972	-	-
chr8:63369207..63369280,+	63369224	p1@2700029M09Rik	[2700029M09Rik]	2700029M09Rik			2700029M09Rik	302.673	1507.68	1036.85	365.165	1114.8	699.646			184.548	1055.43	724.107	151.955	877.415	222.664	5026.82	3216.12	8242.94	0.270382	-0.56718	-0.43538	-0.279516	-1.69909	-0.266364	3.06947	3.26594	2.31133	2.85181	-0.758142	-0.41413	-0.385401	-0.649376	1	ENSMUST00000037190	61	61	>1|ACCCGGAAGCACTAGCGGGCGCTCGGAAGCGGCAGGAGCGCGGGCCTTGGCTCGCTCGCTGCGGCTGCGGG|	-	-	63369285	-	-
chr5:23356408..23356425,+	23356417	p1@2700038G22Rik,p1@Snord93	[2700038G22Rik, Snord93]	2700038G22Rik, Snord93	2700038G22Rik		2700038G22Rik	920.859	1121.17	5637.61	1449.59	1026.24	3766.18			549.588	527.121	2181.89	255.729	1114.67	2077.6	13921.7	6706.6	20628.3	0.654311	-0.581918	-0.127574	-1.10223	-0.0706437	1.07969	2.87503	2.3003	1.72476	3.6393	-1.15028	1.339	-0.299005	0.0814946	0	-	-		-	-	-	-	-	-
chr5:23356393..23356407,+	23356397	p2@2700038G22Rik,p2@Snord93	[2700038G22Rik, Snord93]	2700038G22Rik, Snord93	2700038G22Rik		2700038G22Rik	67.8721	106.908	502.717	55.328	83.3495	557.165			25.35	40.4563	178.634	0	96.8666	233.438	1373.34	574.746	1948.09	-0.292418	0.148218	-0.357233	-5.69209	0.385086	1.24934	3.15763	3.08658	3.5213	9.36984	0.363669	6.28326	0.0385174	0.433549	0	-	-		-	-	-	-	-	-
chr12:72238157..72238208,+	72238181	p1@2700049A03Rik	[2700049A03Rik]	2700049A03Rik			2700049A03Rik	29.3501	98.6847	412.946	22.1312	19.1009	61.6709			3.042	34.5068	35.0889	9.26555	15.4425	41.3006	643.884	138.646	782.53	-0.399422	-2.73339	-2.3392		0.232098	-1.13476	4.10071	4.30669	1.84444	2.55133	-2.25626	-1.75536	-2.38863	-0.137072	2	-	-		-	-	-	-	ENSMUST00000045907|ENSMUST00000149564	645|645	645
chr14:20643029..20643054,-	20643045	p1@2700060E02Rik,p1@Gm10704	[2700060E02Rik, Gm10704]	2700060E02Rik, Gm10704	2700060E02Rik		2700060E02Rik	80.7127	512.612	857.312	818.854	399.383	410.431			26.364	273.675	366.839	203.842	293.408	104.149	3079.31	1268.28	4347.58	3.33471	-1.06177	-0.359696	2.92724	-1.81155	0.100267	4.07677	4.57661	-0.016007	0.961989	-4.09278	-3.61462	0.166952	-0.148981	1	ENSMUST00000022341	95	95	>1|ACCGCCCCGCCCCTTCGCCGCGTCGCCGGTGCCTGCGCTGCCCGCCTCACCTCGCTTCTCCTGTCCCGGCGGAGGCCCGGGCGGCCAGCGCGAGCAGCGGGGACC|	TOP	-	20631304	-	-
chr14:20642993..20643019,-	20643012	p2@2700060E02Rik,p2@Gm10704	[2700060E02Rik, Gm10704]	2700060E02Rik, Gm10704	2700060E02Rik		2700060E02Rik	9.1719	383.774	233.404	113.422	277.832	114.836			9.126	390.284	51.0384	48.1809	131.963	41.3006	1132.44	671.893	1804.33	3.55811	-1.02008	-0.46533	2.33835	-0.302123	-1.56078	5.99691	5.52039	1.78709	1.8357	-4.20982	-3.68468	-0.307303	-1.02276	1	ENSMUST00000022341	62	62	>1|TGCGCTGCCCGCCTCACCTCGCTTCTCCTGTCCCGGCGGAGGCCCGGGCGGCCAGCGCGAGCAGCGGGGACC|	-	-	20631304	-	-
chr18:24629345..24629423,+	24629351	p1@2700062C07Rik	[2700062C07Rik]	2700062C07Rik			2700062C07Rik	33.0188	186.404	201.984	91.2912	180.591	191.393			28.392	188.003	111.647	37.0622	143.194	105.945	884.682	614.243	1498.92	1.45338	-0.0775125	-0.0455893	0.378611	-0.0752748	-0.391583	3.53631	3.37694	2.02075	2.73249	-1.51557	-0.644446	0.136495	-0.196525	1	ENSMUST00000097646	53	53	>1|TGAGAAAGCCGACTTCCGGCGTGGAGTTCTTTCGCAGCGTTTGAGCGACTGAGTTCTCGAGCG|	-	-	24629404	-	-
chr19:60656788..60656895,-	60656800	p1@2700078E11Rik	[2700078E11Rik]	2700078E11Rik			2700078E11Rik	146.75	783.995	430.9	102.357	843.914	350.886			50.7	221.32	41.4687	27.7966	203.56	95.171	2658.8	640.016	3298.82	-0.517634	-0.295969	0.106186	-0.855513	1.18877	-0.120391	3.04508	2.36243	3.53866	3.40256	0.493581	1.04013	-0.0699721	0.0587035	3	-	-		-	-	-	-	ENSMUST00000081790|ENSMUST00000111460|ENSMUST00000166712	180|180|180	180
chr2:84510816..84510883,-	84510842	p1@2700094K13Rik	[2700094K13Rik]	2700094K13Rik			2700094K13Rik	1313.42	907.351	1449.8	818.854	376.809	618.836			2406.22	1013.79	3122.91	155.661	7683.35	1174.37	5485.07	15556.3	21041.4	-0.681314	-1.22756	-1.26671	-3.94596	-1.41062	2.92136	0.843477	0.781585	0.281868	5.82591	-0.561608	5.04432	-1.01623	0.462104	6	ENSMUST00000117299|ENSMUST00000102647|ENSMUST00000189636|ENSMUST00000102646|ENSMUST00000189988	100|100|100|100|100	100	>1|CTTTGCTGCGAGATTTGAACTTTGCATCTGTGATTCCCGGCTGCTGGTTTGTCTCTCCGGAGTTGCATCGCCCCTTATTCCACCAACGCGCCATCCCCGAAATCCGTGCC|>2|CTTTGCTGCGAGATTTGAACTTTGCATCTGTGATTCCCGGCTGCTGGTTTGTCTCTCCGGAGTTGCATCGCCCCTTATTCCACCAACGCGCCATCCCCGAAATCCGTGCC|>3|CTTTGCTGCGAGATTTGAACTTTGCATCTGTGATTCCCGGCTGCTGGTTTGTCTCTCCGGAGTTGCATCGCCCCTTATTCCACCAACGCGCCATCCCCGAAATCCGTGCC|>4|CTTTGCTGCGAGATTTGAACTTTGCATCTGTGATTCCCGGCTGCTGGTTTGTCT…	-	||||	84510172|84510172|84509500|84510172|84510189	-	-
chr2:84510884..84510899,-	84510889	p2@2700094K13Rik	[2700094K13Rik]	2700094K13Rik			2700094K13Rik	157.757	104.167	206.473	141.086	46.8841	159.494			364.026	176.104	880.412	51.8871	1443.17	188.546	815.861	3104.15	3920.01	-0.160584	-0.371427	-1.14333	-2.79874	-2.22026	3.03116	0.975298	1.5359	0.547097	4.96148	-0.428202	3.42558	-0.430331	0.245033	6	ENSMUST00000117299|ENSMUST00000102647|ENSMUST00000189636|ENSMUST00000102646|ENSMUST00000189988	147|147|147|147|147	147	>1|GCCCGCCTTCAGATCACGTGTCCTTCCCCCCACCCCCGCACATTTCCCTTTGCTGCGAGATTTGAACTTTGCATCTGTGATTCCCGGCTGCTGGTTTGTCTCTCCGGAGTTGCATCGCCCCTTATTCCACCAACGCGCCATCCCCGAAATCCGTGCC|>2|GCCCGCCTTCAGATCACGTGTCCTTCCCCCCACCCCCGCACATTTCCCTTTGCTGCGAGATTTGAACTTTGCATCTGTGATTCCCGGCTGCTGGTTTGTCTCTCCGGAGTTGCATCGCCCCTTATTCCACCAACGCGCCATCCCCGAAATCCGTGCC|>3|GCCCGCCTTCAGATCACGTGTCCTTCCCCCCACCCCCGCACATTTCCCTTTGCTGCGAGATTTGAACTTTGCAT…	Inr|Inr|Inr|Inr|Inr	||||	84510172|84510172|84509500|84510172|84510189	-	-
chr17:95149435..95149461,+	95149454	p1@2700099C18Rik	[2700099C18Rik]	2700099C18Rik			2700099C18Rik	155.922	622.262	175.053	110.656	677.215	333.874			98.358	341.498	44.6586	68.5651	429.582	145.45	2074.98	1128.11	3203.09	-0.49286	0.929553	0.121997	-0.517402	1.6924	0.330623	2.35061	1.96762	3.18596	3.05887	0.835356	1.09124	0.234723	0.40925	0	-	-		-	-	-	-	-	-
chr17:95149465..95149481,+	95149470	p2@2700099C18Rik	[2700099C18Rik]	2700099C18Rik			2700099C18Rik	34.8532	115.132	44.8854	35.9632	185.8	57.4178			26.364	104.71	0	31.5029	61.77	34.1179	474.052	258.465	732.517	0.0445995	0.351776	0.688084	0.252527	6.11345	-0.756667	2.18282	1.96953	2.7407	1.59065	0.55788	-0.378879	0.517567	-0.0409654	0	-	-		-	-	-	-	-	-
chr11:63892980..63893029,+	63892993	p1@2810001G20Rik	[2810001G20Rik]	2810001G20Rik			2810001G20Rik	56.8658	167.216	49.374	52.5616	71.1944	12.7595			91.26	158.255	70.1778	59.2995	56.1546	26.9352	409.971	462.082	872.053	-0.112522	-1.91126	-1.22609	-0.617732	-1.36523	-1.48654	1.92003	1.31899	0.670495	0.483192	-1.24953	-0.835797	-0.999603	-1.16404	0	-	-		-	-	-	-	-	-
chr2:94246876..94246919,+	94246911	p1@2810002D19Rik	[2810002D19Rik]	2810002D19Rik			2810002D19Rik	236.635	688.052	215.45	193.648	1293.65	429.57			367.068	872.189	169.065	266.848	701.932	208.299	3057.01	2585.4	5642.41	-0.288552	0.993873	0.910372	-0.459293	0.300278	-0.31311	1.93062	1.50293	3.1503	1.76831	1.21968	0.265375	0.749291	-0.258666	0	-	-		-	-	-	-	-	-
chr2:94246920..94246965,+	94246953	p2@2810002D19Rik	[2810002D19Rik]	2810002D19Rik			2810002D19Rik	66.0377	348.138	85.2823	118.955	362.918	150.987			96.33	399.803	73.3677	57.4464	376.236	34.1179	1132.32	1037.3	2169.62	0.844226	0.820446	0.0598997	-0.740735	-1.09342	-0.0875403	2.70519	2.29036	2.10644	2.82583	-0.598751	0.535474	0.34122	-0.283531	0	-	-		-	-	-	-	-	-
chr12:112951466..112951514,+	112951494	p1@2810002N01Rik	[2810002N01Rik]	2810002N01Rik			2810002N01Rik	135.744	389.256	1063.78	907.379	281.305	595.444			101.4	234.408	1314.24	55.5933	1297.17	666.197	3372.91	3669.01	7041.92	2.73631	-0.836637	-0.467877	-0.861254	-0.979672	2.46575	3.41531	3.92625	-0.0495154	5.12973	-3.46482	1.20348	0.167245	0.291026	4	ENSMUST00000040519|ENSMUST00000160366|ENSMUST00000163220|ENSMUST00000162316	9|9|9|9	9	>1|CCTGCCGTACGCGCGGGCC|>2|CCTGCCGTACGCGCGGGCC|>3|CCTGCCGTACGCGCGGGCC|>4|CCTGCCGTACGCGCGGGCC|	-	|||	112951503|112951503|112951503|112951503	-	-
chr8:127386872..127386906,-	127386881	p1@2810004N23Rik	[2810004N23Rik]	2810004N23Rik			2810004N23Rik	69.7064	1998.37	1171.51	401.128	1753.81	546.532			36.504	1934.76	2051.11	342.825	2220.91	1379.08	5941.05	7965.19	13906.2	2.51618	-1.09929	-0.188276	3.21382	-0.572522	0.198949	5.49691	6.75125	2.51823	3.39055	-2.97867	-3.3607	-0.262017	-0.0288145	1	ENSMUST00000034465	10	10	>1|GGGTCTCCGTGCTGATTCCC|	-	-	127363733	-	-
chr8:127386908..127386919,-	127386913	p2@2810004N23Rik	[2810004N23Rik]	2810004N23Rik			2810004N23Rik	34.8532	581.143	552.091	135.554	510.516	274.329			15.21	579.476	902.742	79.6837	669.643	626.692	2088.49	2873.45	4961.93	1.94426	-1.00768	-0.186767	2.35163	-0.526204	0.208475	5.0031	6.56042	2.52915	4.01554	-2.47395	-2.54488	-0.343651	-0.121944	1	ENSMUST00000034465	42	42	>1|CGGAAGTGGTGGGCACTGGGCGGGATCTGGGGGGGTCTCCGTGCTGATTCCC|	-	-	127363733	-	-
chr8:127386928..127386939,-	127386933	p3@2810004N23Rik	[2810004N23Rik]	2810004N23Rik			2810004N23Rik	0	98.6847	80.7938	2.7664	12.1551	8.50634			3.042	118.989	70.1778	9.26555	39.3082	62.8488	202.906	303.631	506.538		-3.17413	-2.97039		-0.15794	-1.58574	8.49168	5.74276		3.39399		-2.34877	-2.91106	-0.783922	1	ENSMUST00000034465	62	62	>1|CGCAGAAGCCGCGCCGGAAGCGGAAGTGGTGGGCACTGGGCGGGATCTGGGGGGGTCTCCGTGCTGATTCCC|	-	-	127363733	-	-
chr5:124778140..124778197,+	124778178	p1@2810006K23Rik	[2810006K23Rik]	2810006K23Rik			2810006K23Rik	16.5094	101.426	107.725	52.5616	39.9383	53.1646			1.014	45.2158	60.6081	7.41244	40.7121	66.4402	371.325	221.403	592.728	1.64133	-1.01199	-1.33373		0.131509	-0.149627	3.62358	6.13396	0.818885	3.76611	-2.8047	-2.36785	-0.629753	0.100285	2	ENSMUST00000111477|ENSMUST00000077376	78|78	78	>1|TGGAAACCTTAGATTTCCCATCCTCGGTCTACCGTGGGTTTAGAGTCTCGCCGAATGCTTCCGGCCCGAGGTCCTGCCACACCAAGCC|>2|TGGAAACCTTAGATTTCCCATCCTCGGTCTACCGTGGGTTTAGAGTCTCGCCGAATGCTTCCGGCCCGAGGTCCTGCCACACCAAGCC|	Inr|Inr	|	124788653|124788653	-	-
chr11:116938081..116938154,+	116938101	p1@2810008D09Rik	[2810008D09Rik]	2810008D09Rik			2810008D09Rik	689.727	375.55	368.061	439.858	62.5121	61.6709			181.506	430.74	114.836	222.373	126.348	16.1611	1997.38	1091.96	3089.34	-0.648395	-2.56759	-2.57722	0.292237	-2.79129	-1.76539	0.108447	1.58512	-1.82041	-0.640118	-1.92886	-2.22524	-1.34473	-0.993705	0	-	-		-	-	-	-	-	-
chr13:108834615..108834691,+	108834655	p1@2810008M24Rik	[2810008M24Rik]	2810008M24Rik			2810008M24Rik	130.241	3983.02	2742.5	865.883	1382.21	478.481			41.574	546.16	290.281	181.605	144.598	296.287	9582.34	1500.5	11082.8	2.72829	-2.51771	-1.52654	2.11377	0.0294964	-1.91362	5.68497	4.31412	1.10315	1.27727	-4.58182	-3.03685	-1.33007	-0.495857	0	-	-		-	-	-	-	-	-
chr13:17787243..17787270,+	17787255	p1@2810021B07Rik,p1@Gm7102,p1@LOC100505022	[2810021B07Rik, Gm7102, LOC100505022]	2810021B07Rik, Gm7102, LOC100505022	2810021B07Rik		2810021B07Rik	47.6939	254.935	417.435	44.2624	15.628	51.038			12.168	21.418	108.457	18.5311	58.9623	43.0963	830.992	262.632	1093.62	-0.106563	-3.01957	-3.98532	0.58717	-1.32148	1.43986	3.80341	3.3634	0.585445	2.43002	-3.21796	-0.933384	-2.69301	-0.235317	1	ENSMUST00000049744	63	63	>1|TCCTTCTGGCGGTTGATCGCAGAGGTTCCGGTGAGGCGTTCGGCGTGTGAGCTCTGCGGCTTCGTTTCCTGAT|	-	-	17787318	-	-
chr13:17786977..17787047,+	17787001	p2@2810021B07Rik,p2@Gm7102,p2@LOC100505022	[2810021B07Rik, Gm7102, LOC100505022]	2810021B07Rik, Gm7102, LOC100505022	2810021B07Rik		2810021B07Rik	14.675	93.2022	71.8167	22.1312	19.1009	31.8988			19.266	79.7226	149.925	12.9718	75.8087	70.0315	252.825	407.726	660.551	0.576613	-1.15839	-2.25716	-0.553082	-1.09271	-0.0721626	3.44722	3.54147	1.18625	3.44131	-2.26097	-0.100154	-1.29117	-0.646688	0	-	-		-	-	-	-	-	-
chr1:159342832..159342905,+	159342892	p1@2810025M15Rik,p1@LOC100503269	[2810025M15Rik, LOC100503269]	2810025M15Rik, LOC100503269	2810025M15Rik		2810025M15Rik	132.075	2264.27	561.068	428.792	826.549	820.861			81.12	1023.31	532.713	153.808	939.185	441.737	5033.61	3171.87	8205.48	1.69515	0.548557	-1.45332	0.918819	-0.269892	-0.123692	4.41379	4.25326	1.94061	3.16227	-2.47319	-1.09099	-0.510283	-0.0931618	0	-	-		-	-	-	-	-	-
chrX:106029989..106030051,+	106030016	p1@2810403D21Rik	[2810403D21Rik]	2810403D21Rik			2810403D21Rik	102.725	180.922	139.145	304.304	55.5663	61.6709			50.7	140.407	3.1899	53.7402	193.733	12.5698	844.333	454.34	1298.67	1.56209	-1.16745	-1.69414	0.0832183		0.463046	1.63483	1.49282	-1.37231	1.93082	-3.00714	0.437999	-0.00426946	0.419552	0	-	-		-	-	-	-	-	-
chr3:58380574..58380639,+	58380588	p1@2810407C02Rik	[2810407C02Rik]	2810407C02Rik			2810407C02Rik	265.985	2135.43	565.557	135.554	1807.64	869.773			301.158	1556.38	82.9374	135.277	936.377	256.782	5779.94	3268.91	9048.85	-0.96988	0.620522	-0.240354	-1.15167	1.62459	-0.732722	3.34163	2.44255	4.29886	3.13608	0.957238	0.693534	-0.076883	-0.546507	1	ENSMUST00000107924	70	70	>1|CGCAGTGGGGAGCAGTTCGTGGCTAGGTTTTGGGCTGCAGTCTGGGTCTGAAGGCGGCCGGAGCGGCTGTCTCAATTACG|	-	-	58380658	-	-
chr9:65738098..65738150,+	65738143	p1@2810417H13Rik,p1@Gm15428	[2810417H13Rik, Gm15428]	2810417H13Rik, Gm15428	2810417H13Rik		2810417H13Rik	75.2096	1115.69	543.114	49.7952	800.503	557.165			24.336	832.923	162.685	70.4182	624.72	256.782	3141.47	1971.86	5113.34	-0.590055	0.0368167	-0.478698	1.51372	0.656844	-0.414686	4.45395	5.3258	4.7551	3.63655	0.301143	-1.68924	-0.300918	-0.0995272	1	-	-		-	-	-	-	ENSMUST00000045802	92	92
chr9:65738151..65738165,+	65738159	p2@2810417H13Rik,p2@Gm15428	[2810417H13Rik, Gm15428]	2810417H13Rik, Gm15428	2810417H13Rik		2810417H13Rik	20.1782	540.025	193.007	8.2992	284.777	176.506			10.14	185.623	41.4687	0	122.136	55.6661	1222.79	415.034	1637.83	-1.23266	-0.128587	-0.921995		0.420385	-0.601871	5.14868	4.41888	5.7137	8.47818	0.565023	4.0593	-0.681094	-0.415008	1	-	-		-	-	-	-	ENSMUST00000045802	76	76
chr8:73046984..73047013,-	73046996	p1@2810422J05Rik,p2@Uba52	[2810422J05Rik, Uba52]	2810422J05Rik, Uba52	2810422J05Rik		2810422J05Rik	210.954	485.2	596.976	1012.5	604.284	312.608			39.546	102.331	287.091	300.204	108.098	82.6013	3222.52	919.87	4142.39	2.26022	-0.932222	0.316355	2.90861	-1.79108	0.0787224	2.35619	3.28345	-0.143028	-0.65327	-2.49922	-3.93672	0.577097	0.194356	7	ENSMUST00000121623|ENSMUST00000093456|ENSMUST00000137610	60|60|131	83.6667	>1|CTAGGGCGCCCTCCCGGAAGCGCGAGCCAGGCCGCCAGATGTGCAGGCATTGGAGGCGGAGGAGAAAGAG|>2|CTAGGGCGCCCTCCCGGAAGCGCGAGCCAGGCCGCCAGATGTGCAGGCATTGGAGGCGGAGGAGAAAGAG|>3|CTAGGGCGCCCTCCCGGAAGCGCGAGCCAGGCCGCCAGATGTGCAGCTAGCCCGGGTGTCTTGACACCCTAGGCTCTGCATCAGGAAACTCAGTCTCTGTAGTCTGTCCTCTATCATGCATTGGAGGCGGAGGAGAAAGAG|	TOP|TOP|TOP	||	73032230|73037834|73039293	-	-
chr8:73030245..73030275,-	73030260	p2@2810428I15Rik	[2810428I15Rik]	2810428I15Rik			2810428I15Rik	82.5471	287.83	130.168	30.4304	385.491	57.4178			133.848	259.396	12.7596	12.9718	73.0009	21.5482	973.885	513.524	1487.41	-1.4249	-1.17383	0.420846	-3.31796	0.733621	-1.8221	2.33322	1.02111	3.84154	2.81873	1.50832	1.79763	-0.0805422	-1.91196	2	-	-		-	-	-	-	-	-
chr8:73030609..73030665,-	73030637	p1@2810428I15Rik	[2810428I15Rik]	2810428I15Rik			2810428I15Rik	247.641	929.281	816.915	818.854	816.131	1046.28			312.312	550.919	1451.4	107.48	3563.01	1124.1	4675.1	7109.22	11784.3	1.72333	0.356817	-0.187207	-1.53453	-0.36854	2.69208	2.81539	2.67867	1.185	5.44001	-1.6304	2.76134	0.427273	1.05046	2	ENSMUST00000075175|ENSMUST00000136913	6|6	6	>1|ACTTGACTGCGCAGTC|>2|ACTTGACTGCGCAGTC|	-	|	73028335|73028408	-	-
chr4:41660523..41660559,-	41660544	p1@2810432D09Rik	[2810432D09Rik]	2810432D09Rik			2810432D09Rik	27.5157	200.111	179.542	60.8608	137.179	238.177			16.224	63.0642	165.875	7.41244	115.117	86.1926	843.386	453.885	1297.27	1.13108	0.40673	-0.543086		-0.940455	0.863066	3.76227	3.77812	2.61479	4.67273	-1.14748	0.894609	0.0993056	-0.231646	1	ENSMUST00000038434	94	94	>1|CGCTCCCGGTCTGCGCGCCATCTTGGCTACTCCGTGAGGGTCGAGCGTCTACTGGCGACCGTGTGCATATCCAGAGAGAGACCCACCAACGTCGCGAGGGCAGA|	-	-	41659313	-	-
chr11:16851086..16851134,-	16851100	p1@2810442I21Rik	[2810442I21Rik]	2810442I21Rik			2810442I21Rik	62.3689	241.229	49.374	49.7952	175.381	42.5317			6.084	136.837	28.7091	64.8589	133.367	21.5482	620.68	391.405	1012.08	-0.321926	-0.212888	-0.458791	3.31135	-0.40576	-0.0369229	2.21111	4.65648	2.11857	1.24967	-0.0925465	-3.40681	-0.398244	0.355797	0	-	-		-	-	-	-	-	-
chr6:134848000..134848030,+	134848012	p1@2810454H06Rik	[2810454H06Rik]	2810454H06Rik			2810454H06Rik	100.891	27.4124	35.9083	185.349	32.9925	57.4178			44.616	19.0382	3.1899	22.2373	51.943	14.3654	439.971	155.39	595.361	0.874201	0.669737	0.262931	-0.988577		1.42445	-0.66783	-0.98916	-1.03161	1.55497	-0.363784	2.54413	0.746079	0.402994	0	-	-		-	-	-	-	-	-
chr6:149258304..149258346,+	149258334	p3@2810474O19Rik	[2810474O19Rik]	2810474O19Rik			2810474O19Rik	25.6813	16.4475	224.427	19.3648	13.8916	93.5697			9.126	9.51912	73.3677	1.85311	1.40386	64.6445	393.382	159.914	553.296	-0.398323	-1.25766	-0.235843		-0.181301		3.20466	3.11481	2.44223	4.82176	-0.762437	1.70695	-1.06861	-0.435626	6	ENSMUST00000185930	394	394	>1|TCGAGCGCCCAGGCCTGTGTGAGCGCCGCGGCCCGCAGCATCTTGGAATCTGTTTGCATTTGTGGTACTTAAGAGTGCCTTCCTAGAAAAATGGAAAAACAGAATTAGAGGCGTGAATACCTTGTGGAAGAGATTAAAAGGTAAAATTGTATTTACAGGTCTTGCTTGACCCCTCCAANNNNNNNNNNNNNNNNNNNNNNNNNNNNNNNNNNNNNNNNNNNNNNNNNNNNNNNNNNNNNNNNNNNNNNNNNNNNNNNNNNNNNNNNNNNNNNNNNNNNNNNNATAGGGTCTCTCCACATTGTCCAGACATTTTCACAGTCTTGTTTAGCTTCTTCAGTAGCTGAGAGTAAGATTTATGACATTCAAAACCACAGACTTTACAATACTGCTAAGTCA…	-	-	149273979	ENSMUST00000130664|ENSMUST00000046689|ENSMUST00000190785|ENSMUST00000100765|ENSMUST00000189932	344|201|275|270|183	254.6
chr12:85749989..85750052,+	85750042	p1@2900006K08Rik	[2900006K08Rik]	2900006K08Rik			2900006K08Rik	0	79.496	179.542	33.1968	215.32	42.5317			0	104.71	89.3172	25.9435	176.887	41.3006	550.086	438.159	988.244	6.07454	-2.06486	1.43183	5.72484	-1.10347	0.753623	9.0198	8.60383	2.93865	3.04788	-6.08115	-5.55595	0.167789	0.330633	1	ENSMUST00000081828	89	89	>1|GACGTTAGCCCTTCGGCGTGGTGGTTTCCTTAGAGACGGAGTCGGCCCAGGTGGCGGCCACCAGGACACCAGCACGGTGAGACTCCCGCAGAAGTCAAG|	-	-	85750131	-	-
chr17:27270824..27270842,-	27270831	p1@2900010M23Rik	[2900010M23Rik]	2900010M23Rik			2900010M23Rik	598.008	2316.35	1202.93	1427.46	981.093	618.836			320.424	1306.5	673.069	631.91	1761.85	545.887	7144.68	5239.64	12384.3	1.25452	-0.958358	-1.23897	0.97863	-0.301903	0.431242	2.55604	2.62525	0.164501	1.86786	-2.39154	-0.757389	-0.443556	0.353946	2	ENSMUST00000025045|ENSMUST00000119227	10|10	10	>1|CGGGGCAAGCGGGGCCCAAG|>2|CGGGGCAAGCGGGGCCCAAG|	-	|	27259657|27259657	-	-
chr17:27270851..27270869,-	27270860	p2@2900010M23Rik	[2900010M23Rik]	2900010M23Rik			2900010M23Rik	1412.47	2393.1	1445.31	1939.25	715.417	759.191			405.6	1294.6	931.451	563.345	1693.06	554.865	8664.74	5442.92	14107.7	0.457135	-0.928395	-1.74132	0.473464	-0.746817	0.386995	1.44197	2.4549	-0.395048	1.99554	-1.83701	-0.45936	-0.621086	0.0952365	2	ENSMUST00000025045|ENSMUST00000119227	39|39	39	>1|CTGCGGTCTTGACTACTCCCCCCCAGGGGCGGGGCAAGCGGGGCCCAAG|>2|CTGCGGTCTTGACTACTCCCCCCCAGGGGCGGGGCAAGCGGGGCCCAAG|	-	|	27259657|27259657	-	-
chr8:3621529..3621583,+	3621566	p1@2900053A13Rik	[2900053A13Rik]	2900053A13Rik			2900053A13Rik	146.75	2431.48	525.16	464.755	949.837	138.228			136.89	1833.62	315.8	246.464	1285.94	317.835	4656.21	4136.55	8792.76	1.65975	-1.92187	-1.35562	0.846021	0.00925349	-0.511705	4.32786	3.96793	1.22633	2.69955	-3.10153	-1.26838	-0.998723	-0.305236	1	ENSMUST00000156380	18	18	>1|AAGTGGCTTCGTAAAACCGAAGAGCGAG|	-	-	3621584	-	-
chr1:120355840..120355844,-	120355842	p1@2900060B14Rik	[2900060B14Rik]	2900060B14Rik			2900060B14Rik	333.857	41.1186	26.9313	257.275	24.3103	19.1393			220.038	57.1147	22.3293	144.543	37.9043	43.0963	702.632	525.025	1227.66	-0.375277	-0.482081	-0.746292	-0.604551	0.93332	-0.585169	-2.28616	-1.46397	-2.55219	-0.831593	-0.26603	0.632372	-0.417815	-0.408277	0	-	-		-	-	-	-	-	-
chr2:112295179..112295220,+	112295208	p1@2900064A13Rik	[2900064A13Rik]	2900064A13Rik			2900064A13Rik	99.0565	1828.41	1054.81	165.984	1104.38	686.887			43.602	817.454	245.622	79.6837	489.949	323.222	4939.52	1999.53	6939.06	0.741796	-0.61847	-0.727092	0.862465	0.395382	-0.737919	4.85627	4.59194	3.42793	3.34306	-1.42834	-1.24887	-0.607456	-0.309583	1	ENSMUST00000069747	16	16	>1|AGGCCTGACTCCTCAGAGCTGCTGTC|	-	-	112295224	-	-
chr7:88668441..88668495,+	88668458	p1@2900076A07Rik	[2900076A07Rik]	2900076A07Rik			2900076A07Rik	38.522	104.167	8.97709	82.992	130.234	42.5317			35.49	146.356	19.1394	27.7966	82.828	5.38704	407.424	316.998	724.421	1.09735	2.18288	0.320821	-0.346965		-0.817534	1.54217	2.20548	1.05327	1.64855	-0.488894	-0.556932	0.751945	-0.790204	0	-	-		-	-	-	-	-	-
chr7:134160054..134160117,-	134160107	p3@2900092E17Rik	[2900092E17Rik]	2900092E17Rik			2900092E17Rik	5.50314	304.278	35.9083	24.8976	140.652	51.038			4.056	130.888	25.5192	12.9718	30.885	16.1611	562.277	220.481	782.758	2.0809	0.501368	-1.11051		-0.643091	-2.06569	5.82658	5.106	2.91977	1.81939	-2.90681	-3.28661	-0.673282	-1.4113	3	-	-		-	-	-	-	-	-
chr4:74924150..74924242,-	74924195	p1@3110001D03Rik	[3110001D03Rik]	3110001D03Rik			3110001D03Rik	137.578	490.682	700.213	340.267	234.42	538.026			319.41	360.537	1687.46	18.5311	2779.65	881.679	2441.19	6047.26	8488.45	1.3033	-0.379808	-1.06409	-4.07124	-0.936135	2.94495	3.10909	2.67883	1.18158	7.58806	-1.92751	4.90924	-0.255582	0.636237	1	ENSMUST00000030103	41	41	>1|ATTTTACAGCATTTCAAAGTGAAGGCTCGGCTCGCTGTGCACTCTTCTGAC|	-	-	74923608	-	-
chr16:13672073..13672125,+	13672080	p1@3110001I22Rik,p1@Bfar	[3110001I22Rik, Bfar]	3110001I22Rik, Bfar	3110001I22Rik		3110001I22Rik	22.0126	285.089	570.045	96.824	392.437	533.773			19.266	302.232	236.053	18.5311	146.002	378.889	1900.18	1100.97	3001.15	2.11207	-0.094765	0.460358	-0.0546621	0.681515	-1.04712	5.24819	4.76862	3.25125	4.78696	-1.99694	0.018343	0.221846	-0.0369978	3	ENSMUST00000035426|ENSMUST00000069281	296|165	230.5	>1|CCCTAGGCCCAGGTTATTTCCGGAAGCGAAGCCTTGTCCTCTACTTCCGCGGGGTCCTGGCAGGTGGCGGTGACAGAGTGGGTACCAGGACTAGTGGCGAGCACATGCCAACGAGACCTCTAACTGCTCCTGTGGCAGCCTGCGTACCAGCATCCTGGAACCTGGAACCATCAATTTACACTGAAGTTCACATCTCCTAGAGTCTAGCCTATCTAGTGTGCAAGTGAATTTTGAGGCTAGTATCTCAGTGGCCATCAAAGAACTGCTAGGATTGTCTTGGTGAACTTGTGGCGAGCCCAACCTTCC|>2|CCCTAGGCCCAGGTTATTTCCGGAAGCGAAGCCTTGTCCTCTACTTCCGCGGGGTCCTGGCAGGTGGCGGTGACAGAGTGGGTACC…	-	|	13677131|13685228	ENSMUST00000023365	165	165
chr16:13671951..13672011,+	13671978	p2@3110001I22Rik,p2@Bfar	[3110001I22Rik, Bfar]	3110001I22Rik, Bfar	3110001I22Rik		3110001I22Rik	0	41.1186	44.8854	27.664	114.606	110.582			7.098	47.5956	35.0889	22.2373	19.6541	41.3006	338.856	172.975	511.831	5.81578	1.29133	1.46766	1.58137	0.232098	-1.25483	7.4347	3.45262	3.00241	1.43446	-4.43229	-2.01816	1.5503	-0.109356	2	ENSMUST00000023365|ENSMUST00000035426	267|398	332.5	>1|GCATGCCCCTAGAGCAGCCGCTCTAGGCAGCCGGAGGTCGCACGGGGTTGAGAGCATAAAGAGGTCTCTCCTCTATGGTTGCGGGAGCTGATCGTAGTCGGCCCCTAGGCCCAGGTTATTTCCGGAAGCGAAGCCTTGTCCTCTACTTCCGCGGGGTCCTGGCAGGTGGCGGTGACAGAGTGGGTACCAGGACTAGTGGCGAGACTTTATGATGCATTGCAGCAGTGTCCTGAGTCTGAAAGTGTCTATGTGTATGGATCCCAGAATTTGCTGAGAG|>2|GCATGCCCCTAGAGCAGCCGCTCTAGGCAGCCGGAGGTCGCACGGGGTTGAGAGCATAAAGAGGTCTCTCCTCTATGGTTGCGGGAGCTGATCGTAGTCGGCCCCTAGGCCCAGG…	-	|	13685228|13677131	-	-
chr18:12327220..12327300,+	12327276	p1@3110002H16Rik	[3110002H16Rik]	3110002H16Rik			3110002H16Rik	146.75	1066.34	3038.74	495.186	1156.47	1973.47			92.274	341.498	1741.69	244.611	440.813	2194.32	7876.97	5055.2	12932.2	1.75115	-0.622613	0.117009	1.40164	0.333205	0.367813	4.80125	4.48927	2.65887	3.42665	-2.14238	-1.06263	-0.230025	0.404541	1	ENSMUST00000025276	33	33	>1|CGCGGACTGCAACCTCTGCGGAAGAGCTGTGCGCGTCCCAGCC|	-	-	12327309	-	-
chr10:17742928..17743031,-	17742957	p1@3110003A17Rik,p1@Gm6314	[3110003A17Rik, Gm6314]	3110003A17Rik, Gm6314	3110003A17Rik		3110003A17Rik	1443.66	16853.2	5740.85	4232.59	7202.79	2413.67			429.936	7314.25	1566.24	1493.61	3168.52	1533.51	37886.7	15506.1	53392.8	1.55148	-1.24986	-1.22633	1.79541	-0.030458	-1.20677	3.96767	4.36685	1.18387	1.65415	-2.7838	-2.7127	-0.795487	-0.587556	1	-	-		-	-	-	-	ENSMUST00000020002	92	92
chr1:122017738..122017760,+	122017750	p1@3110009E18Rik	[3110009E18Rik]	3110009E18Rik			3110009E18Rik	108.228	589.367	359.084	113.422	144.125	129.722			48.672	260.586	111.647	51.8871	193.733	111.332	1443.95	777.857	2221.81	0.0673223	-1.46536	-2.02807	0.0913738	-0.00404945	-0.426735	3.1256	2.92223	1.26795	2.5442	-1.85765	-0.378033	-1.44695	-0.237454	3	ENSMUST00000027637|ENSMUST00000112644|ENSMUST00000056038	649|56|56	253.667	>1|GAGGGAGTTTATTGCGCACGCGCGGGGAGGAGCCGCGGGGCACGTTGGGAGCAGGTGGGACGCGTTTCGTTTTTTTTTTTTTTTCCGTGGGGGAAGGGACGGACGGGACATTCTCCGTCAGGGCAGTTGGGCAGGAGCTAGCAGGCACTGAGAACGCGTGAAATGGGGTGCTGCGGGAGGAGAGCAGAAATCAGTATGATTCTTTCCCTTTAACTCTCATGCGGATTGGAAAGAGGCCGGAAGTTGCATCGCTGGTTGAGTAAATTATCCGACTAGAAAATGGGATGCCCCGACCCCTTTCGGAAAATCCAGGGAAGAATCCCCGGTGCACAGCGCAATGGTGGCCCGCTGGACCAAGTCCATATCTAGGCCTTTTCTTCTGAACTTCTGGCATAT…	-	||	122047191|122047191|122047191	-	-
chr12:50490846..50490881,+	50490856	p1@3110039M20Rik	[3110039M20Rik]	3110039M20Rik			3110039M20Rik	23.8469	241.229	44.8854	49.7952	182.327	55.2912			16.224	315.321	22.3293	14.8249	197.945	71.8272	597.375	638.471	1235.85	1.04668	0.297808	-0.402913	-0.126044	1.66365	-0.670369	3.5573	4.33767	2.24319	4.14046	-1.31411	-0.197208	-0.10878	-0.313821	1	-	-		-	-	-	-	-	-
chr7:88934312..88934376,-	88934340	p1@3110040N11Rik	[3110040N11Rik]	3110040N11Rik			3110040N11Rik	33.0188	331.69	134.656	55.328	395.91	178.633			17.238	110.66	15.9495	12.9718	98.2705	35.9136	1129.24	291.003	1420.24	0.736017	0.406403	0.254984	-0.396904	1.14643	-0.170483	3.7999	2.84115	3.36461	3.32157	-0.435295	0.480414	0.334662	0.0326947	1	ENSMUST00000026092	71	71	>1|TGGCGCCTGCGTGGTTGGGATGCTGCTGCTTGCTGTAGGTCGGTGTGCTTGGCCTCTGTTAGACTCCTGTGTGGTTCCACA|	-	-	88927928	-	-
chr4:35173038..35173106,-	35173076	p1@3110043O21Rik	[3110043O21Rik]	3110043O21Rik			3110043O21Rik	34.8532	386.515	444.366	141.086	439.321	210.532			16.224	54.7349	47.8485	24.0904	54.7507	73.6229	1656.67	271.271	1927.95	2.00177	-1.07591	0.184528	0.556177	0.616448	0.000411542	4.5556	2.62382	2.19954	2.38979	-2.35606	-0.234033	-0.130278	0.358508	3	ENSMUST00000108126|ENSMUST00000108127	89|100	94.5	>1|NNNNNNNNNNNNTCCCTGCGCCGGCGGTGAAGGCGCAGCAGCGGCGAGTGGGAAAGACAAGAAAATGTCCAGAAAATTGTCTTGGAAGGCACAGAGAGG|>2|NNNNNNNNNNNNTCCCTGCGCCGGCGGTGAAGGCGCAGCAGCGGCGAGTGGCTATTGCAAGCGTTCGGATAATGTGAGACCTGGAATGCAGTGAGACCTGGGATGCAGGG|	-	|	35140130|35140130	-	-
chr6:34828006..34828078,-	34828065	p1@3110062M04Rik	[3110062M04Rik]	3110062M04Rik			3110062M04Rik	49.5283	104.167	67.3282	41.496	69.4579	82.9368			26.364	35.6967	22.3293	12.9718	65.9816	52.0747	414.914	215.418	630.332	-0.252491	0.298799	-0.58125	-0.995735	1.20348	0.877097	1.78155	1.1234	1.86421	3.13756	0.0826601	2.01416	-0.188501	0.631704	3	ENSMUST00000055097|ENSMUST00000115007|ENSMUST00000115006	579|254|254	362.333	>1|CGCGTCTCGCAGTTCTGAATCCCCGGAACCCACGGGAAGGACCGCAGCGCTGCCCTCCCCTCTTGCCCACGGTTCCATCCTGTCCCCAGGCCCCCGGCTCTGCGCCCTCTGCGGTAGGGAGGGAGTGGCGCGGCCAGCTCCGCGCTAGTGCAGCGACGTCCCGCGTGTGCCTTCTGGGTGAGATTTTCCAGGGACCCAACGGGCCCGACCCGATCAGCGCTGAGCTCCAGAAACCTTGCGGCGGGCAGGACCTGGCTGCTGGCTCGATGGTCGATATCCAGCTTTCTACGACTTTGTGCACGCTAATTCTTAACCACGTCTGTTTCTCGTCTATAAAATGGACATGATACACATGTACTGCCGGGTCTGACTCATTTCTGTACACTGTCACTCACT…	-	||	34824443|34824443|34824443	-	-
chr5:139936558..139936593,-	139936565	p3@3110082I17Rik	[3110082I17Rik]	3110082I17Rik			3110082I17Rik	1.83438	109.65	58.3511	30.4304	225.738	68.0507			1.014	92.8114	89.3172	27.7966	47.7314	28.7309	494.054	287.402	781.456	3.72791	0.220103	1.03838	4.22419	-1.6195	-0.952082	6.17357	6.9144	3.25014	1.44352	-2.92344	-5.47088	0.930817	-0.809828	1	ENSMUST00000198474	145	145	>1|GCGCCCTCCCATGCGGCGGCCATTGGCTGGCTGGAAGATGGACGCCTTCCCGATCCAATGGATAGCGCTGATCTTCTGAGGGCGGGACGGCGCGGAACCTGCTGAGCTGGTGGTGGAGGCGCGTGGCAGAGGTGTGCGAGAGTGGGAGCTGCAGG|	-	-	139837125	-	-
chr5:139936455..139936503,-	139936489	p1@3110082I17Rik	[3110082I17Rik]	3110082I17Rik			3110082I17Rik	55.0314	3305.94	3442.71	564.346	3516.31	2001.12			80.106	3168.68	4765.71	400.272	2248.99	4291.68	12885.5	14955.4	27840.9	3.34648	-0.782591	0.0889886	2.31382	-0.151134	-0.49451	6.92526	6.62118	3.2882	4.02869	-3.63706	-2.59248	-0.161812	-0.207467	2	ENSMUST00000066052|ENSMUST00000198474	69|69	69	>1|TGAGGGCGGGACGGCGCGGAACCTGCTGAGCTGGTGGTGGAGGCGCGTGGCAGAGGTGTGCGAGAGTGGGAGCTGCAGG|>2|TGAGGGCGGGACGGCGCGGAACCTGCTGAGCTGGTGGTGGAGGCGCGTGGCAGAGGTGTGCGAGAGTGGGAGCTGCAGG|	-	|	139836498|139837125	-	-
chr5:139936444..139936454,-	139936448	p2@3110082I17Rik	[3110082I17Rik]	3110082I17Rik			3110082I17Rik	3.66876	452.305	480.274	124.488	644.222	253.064			6.084	604.464	647.55	61.1526	526.449	817.034	1958.02	2662.73	4620.76	4.90603	-0.923012	0.509788	3.22713	0.335175	-0.199186	7.80624	7.57165	2.84458	4.44621	-4.96166	-3.12544	0.126049	0.158893	2	ENSMUST00000066052|ENSMUST00000198474	28|28	28	>1|GGCGCGTGGCAGAGGTGTGCGAGAGTGGGAGCTGCAGG|>2|GGCGCGTGGCAGAGGTGTGCGAGAGTGGGAGCTGCAGG|	-	|	139836498|139837125	-	-
chr7:109044886..109044945,+	109044927	p1@3200002M19Rik	[3200002M19Rik]	3200002M19Rik			3200002M19Rik	209.119	1409	682.259	719.264	925.527	206.279			82.134	395.043	137.166	166.78	265.33	105.945	4151.45	1152.4	5303.84	1.77975	-1.72329	-0.606056	1.01746	-0.371059	-0.573331	3.31887	2.68854	0.653667	1.15217	-2.6652	-1.53637	-0.313435	-0.191124	4	ENSMUST00000035395|ENSMUST00000106973|ENSMUST00000144207	37|47|99	61	>1|CTGGGGAAACGCTTCCGGGTCGCCGCCGGCTGCCGGCTCTTGGCGCG|>2|CTGGGGAAACGCTTCCGGGTCGCCGCCGGCTGCCGGCTCTTGGCGCGCTTAGGAGCC|>3|CTGGGGAAACGCTTCCGGGTCGCCGCCGGCTGCCGGCTCTTGGCGCGNNNNNNNNNNNNNNNNNNNNNNNNNNNNNNNNNNNNNNNNNNNNNNNNNNNNNNNNNNNNNN|	-	||	109044964|109046465|109046308	-	-
chr2:163245244..163245284,-	163245278	p1@3230401D17Rik	[3230401D17Rik]	3230401D17Rik			3230401D17Rik	78.8783	246.712	278.29	69.16	533.09	689.013			81.12	140.407	114.836	72.2713	235.849	292.696	1895.14	937.18	2832.32	-0.188415	1.3064	1.10998	-0.165553	1.34602	0.746176	2.72688	1.6477	4.13348	2.86195	1.4066	1.21425	1.09581	0.83596	2	ENSMUST00000046908	176	176	>1|TTGCGCAGGCGCAGTACAACTCTAGAGGCGCGGGCCACCCTATCGGTGGGGTTTGGATCCGGGTCAGACAGACGCGGCGGACGCGGAGAGACGCTCGGAGCCGACGGGGCCGGATTCCCGGGAGCGCCCCAGCTGCGAGGAGTATTAACGGGAGGGAACATCAATAGGCGTACAGAAACCTTCACA|	-	-	163232140	-	-
chr14:13116712..13116753,+	13116726	p1@3830406C13Rik	[3830406C13Rik]	3830406C13Rik			3830406C13Rik	55.0314	213.817	67.3282	44.2624	123.288	36.1519			34.476	113.04	19.1394	35.2091	58.9623	1.79568	539.879	262.622	802.501	-0.311016	-0.887995	-0.791876	0.0299259		-0.933148	2.3425	1.9235	1.83717	0.778606	-0.505333	-1.1449	-0.721365	-0.793078	2	ENSMUST00000112669|ENSMUST00000163392	76|76	76	>1|ACGCCCAGGTCTTGCGCAGGCGTCGTCCATGGCGCGTTCCCGGAAGAGCTCAGAGCAGAAAACTTATAGCCCAGCTTTGATTAAAG|>2|ACGCCCAGGTCTTGCGCAGGCGTCGTCCATGGCGCGTTCCCGGAAGAGCTCAGAGCAGAAAACTTATAGCCCAGCTTTGATTAAAG|	-	|	13117929|13117929	-	-
chr1:36425966..36426004,-	36425976	p1@4632411B12Rik	[4632411B12Rik]	4632411B12Rik			4632411B12Rik	16.5094	68.531	175.053	24.8976	65.985	161.62			11.154	52.3552	73.3677	0	29.4811	123.902	512.597	290.26	802.857	0.578358	-0.114843	-0.0542161		0.751993	-0.817989	3.84297	3.43708	3.16694	8.26569	-0.676037	4.82861	-0.0426476	0.163695	3	ENSMUST00000185912|ENSMUST00000010597|ENSMUST00000188957	264|79|179	174	>1|GGGTCCGGCTCGGGCGAGCGCGCGGCCGACAACTGCGGCTTTCAGTGCATGAGCGGGAACTGGACCTCGTTTTCCTGGATCATAGCTATGCAAAACCGTGGAGTGCCCACCCAGATGCCAGTAGTGCCCGCCCCACCCGCATGCTCTTTGTAACCCCCCGTCGGCAGCAGGAGAATACTATGTGAGTTTGAGAATACCATACGTTCCAATAGATGTGGAGACGGTCACGGCAACTCCTGTTCCACTTTATGACAATCAGAAGGCAAGAAGTGTG|>2|GGGTCCGGCTCGGGCGAGCGCGCGGCCGACAACTGCGGGTGACTAGCATGCAGATATTCACACCCTGACTTGGCTGCTTGACTACTGAC|>3|GGGTCCGGCTCGGGCGAGCGCGCGG…	-	||	36394475|36394475|36424810	-	-
chr8:122302280..122302331,-	122302313	p1@4632415K11Rik	[4632415K11Rik]	4632415K11Rik			4632415K11Rik	27.5157	87.7197	139.145	33.1968	349.026	665.621			11.154	57.1147	210.533	29.6498	53.3468	192.138	1302.22	553.936	1856.16	0.266376	2.25402	1.98623	1.37132	-0.131581	-0.0975761	3.0207	4.52413	4.91293	3.02835	1.89223	-1.49578	2.04022	-0.0190708	1	ENSMUST00000049156	77	77	>1|CGACCCGGGCAACCTTGCTGCCCAGGACGTACCGGAAGGAGCTCGGTCCCTGTAGACCAAGGCTGAGAGTTCCAGAGAGCAGGCAAG|	-	-	122285613	-	-
chr3:19794855..19794894,+	19794876	p1@4632415L05Rik	[4632415L05Rik]	4632415L05Rik			4632415L05Rik	44.0251	74.0135	26.9313	13.832	239.63	129.722			79.092	105.9	41.4687	64.8589	275.157	86.1926	528.153	652.67	1180.82	-1.63538	2.24708	1.68824	-0.284241	1.0466	1.37337	1.188	0.893623	4.68963	2.46894	3.50163	1.57531	1.3992	0.910808	0	-	-		-	-	-	-	-	-
chr7:100022706..100022754,-	100022716	p1@4632434I11Rik	[4632434I11Rik]	4632434I11Rik			4632434I11Rik	29.3501	115.132	67.3282	33.1968	244.839	144.608			22.308	132.078	140.356	3.70622	80.0203	89.784	634.454	468.252	1102.71	0.174877	1.09717	1.08523	-2.43894	-0.641675	-0.719416	2.61572	3.58094	3.53259	5.33945	0.91687	1.75851	0.994973	-0.762721	1	ENSMUST00000032877	166	166	>1|TGGCGTTTGGAGAGCGGCGGACCGAGCGGCCGGAGGGCGGAGCGGTTGCCCGGGCTTGTCTGTGTCCTTTGCCTCAGATAAAATTTTAAGTGCCTCCATTATGCCAAGAAGGGCCAGGTTTTGGATGACTTCAACTAACAATAGAGACTGCTGTCCTAGGGACAAAGTATAGACAC|	-	-	100006515	-	-
chr8:125736757..125736811,+	125736764	p1@4732415M23Rik	[4732415M23Rik]	4732415M23Rik			4732415M23Rik	22.0126	90.461	26.9313	24.8976	173.645	27.6456			11.154	36.8866	35.0889	38.9153	98.2705	43.0963	365.593	263.412	629.004	0.173962	0.0370879	0.936968	1.75793	0.292779	1.40156	2.38867	2.63667	2.99009	1.84771	0.601427	-0.788959	0.696262	1.11217	2	ENSMUST00000060133	96	96	>1|GCACGCGGTTGCCATGGTAATGAGCTCCCGGAGCCTAGTGTGGGTTTTGTGAGTCGGTCGGGTTAACCGGCCCCGAGGCCGCCCGGCTGGAGCGGCGGGGTCACCT|	-	-	125736860	-	-
chr4:115410359..115410415,+	115410383	p1@4732418C07Rik	[4732418C07Rik]	4732418C07Rik			4732418C07Rik	33.0188	87.7197	134.656	47.0288	93.7682	295.595			10.14	33.3169	12.7596	14.8249	50.5391	30.5266	691.787	152.107	843.894	0.50383	1.13143	0.0956696		1.22647	0.593858	2.7332	2.1301	3.03609	2.41209	0.302897	0.281982	0.771726	0.765123	2	ENSMUST00000106525|ENSMUST00000106522	880|880	880	>1|GAAGTGAGCTAAGACTGGAGCTATGGCCCGGGTCTGGAGCCTGCGGCGGCCGCCACCGCCAGCACATCCAGAGAAGTCGCGACCGAAGCAGGGGCCGGAGACGCGGCTGGACTGGCCGCGGCGCGTGTGAGTTGCGGAAGTCGCTGGTGGCGGAACACTTCAGGCTGGCGGAGCGGTGGTCACCCCTCATCACTGCGCCCCCTCCAGGCCCTAGCAGCAGGGCTCCCGCTCCTCTCGCGCGGGTCTCTACAAACTCAGGACAGAAGCCACGGGAAGGTGATCATCCCGAATCCTGGTGGGCGTCCCGGCCTGGGAGTTTTCTAGGCGCCCAGGCAGTGTTGGCGCTCTCCTGTCACCACCTCTCCAGTTAAGGATCAGCGAGTTCCCACTGCCTGC…	-	|	115411263|115411263	-	-
chr4:115410428..115410445,+	115410436	p3@4732418C07Rik	[4732418C07Rik]	4732418C07Rik			4732418C07Rik	18.3438	13.7062	201.984	11.0656	15.628	157.367			11.154	40.4563	47.8485	5.55933	19.6541	26.9352	418.095	151.607	569.703	-0.70425	-0.3591	0.183049		-0.817443	-1.02301	3.52014	2.92981	3.90698	2.95817	0.386842	0.0283572	-0.345704	-0.924937	2	ENSMUST00000106525|ENSMUST00000106522	827|827	827	>1|CACCGCCAGCACATCCAGAGAAGTCGCGACCGAAGCAGGGGCCGGAGACGCGGCTGGACTGGCCGCGGCGCGTGTGAGTTGCGGAAGTCGCTGGTGGCGGAACACTTCAGGCTGGCGGAGCGGTGGTCACCCCTCATCACTGCGCCCCCTCCAGGCCCTAGCAGCAGGGCTCCCGCTCCTCTCGCGCGGGTCTCTACAAACTCAGGACAGAAGCCACGGGAAGGTGATCATCCCGAATCCTGGTGGGCGTCCCGGCCTGGGAGTTTTCTAGGCGCCCAGGCAGTGTTGGCGCTCTCCTGTCACCACCTCTCCAGTTAAGGATCAGCGAGTTCCCACTGCCTGCTCTGCAAAGTCTCCTCTCCTCCCATTCAAAAACAAGTTTATTTTCCTTCTGCA…	-	|	115411263|115411263	-	-
chr13:120251559..120251617,+	120251575	p1@4833420G17Rik	[4833420G17Rik]	4833420G17Rik			4833420G17Rik	16.5094	137.062	206.473	52.5616	126.761	121.215			16.224	67.8237	86.1273	40.7684	25.2696	37.7093	660.582	273.922	934.504	1.64133	-0.765932	-0.112296	1.30312	-1.1809	-1.40672	4.33815	3.20716	2.22737	0.621238	-2.11078	-2.58592	-0.260234	-0.711243	1	ENSMUST00000026519	444	444	>1|GCTTTTCCGGAGACCGCCCCTTCCTCTCGGTGCGGGAGGCTCCAACTGCTGCCTCGCNNNNNNNNNNNNNNNNNNNNNNNNNNNNNNNNNNNNNNNNNNNCCTCGCGTCGCCGATGCTGCCCCAGAGGACTGGACCGGTGTTTCAACCGAAACACTTCTTGTATCCGTGTTTTTCCGTAGATGTGATTATTTTTCTTCCTCAAGAAATGCTTCTCGGTAGTTAATACATTACGGAAGGAACCGTGGAGAAGCGCTACGCAAACAGCACAGTTCGTGCCACTTGAGCAAAATAGAGGTCGGTCGGAGGCCGAGGTTGCCCTCCCTTCCAGGTGCAGAACAACTTCGCAGCCCACAGCCGCCGCTTGACAGAACTCCTGAGCCTTAAGCACACTGCCT…	-	-	120254910	-	-
chr13:54666660..54666723,-	54666685	p1@4833439L19Rik	[4833439L19Rik]	4833439L19Rik			4833439L19Rik	137.578	265.9	121.191	63.6272	236.157	65.9241			152.1	188.003	41.4687	74.1244	137.579	10.7741	890.378	604.048	1494.43	-1.10648	-0.87344	-0.170799	-1.03204	-1.8963	-0.449094	1.48905	0.591699	2.23831	0.996167	0.749266	0.404468	-0.520119	-0.776946	5	ENSMUST00000153065|ENSMUST00000143144|ENSMUST00000132136|ENSMUST00000126295	280|316|204|285	271.25	>1|TTCGGTTGCCGGCCGGCGACTGTCCTCCGTAGGGGAGCGTTCGTCGCGCTCTCACGATGGCTCTGCTCTGTTCAGCCCAGCAGCCTCTTGGGCCATCTGGAGCCTCGGAGCCTCTTTAGTGCGGGAAGTCGGGCCGCAGGCGGCGGGCGAGCAGAGCCTCTGGATGGACCCTTCCTCAGAAGCTTCGCTAATTTGCAGAAGCTGGGCAATGCTCCTCATTAACATCTGTCTGTCTGCATAGTCCGGCGTCATTTCACTGTGCTCTTGCTCCCAGCGGGCCTCTAGGCAAG|>2|TTCGGTTGCCGGCCGGCGACTGTCCTCCGTAGGGGAGCGTTCGTCGCGCTCTCACGATGGCTCTGCTCTGTTCAGCCCAGCAGCCTCTTGGGCCATCTGGAG…	-	|||	54653972|54657947|54663053|54663068	ENSMUST00000026989	311	311
chr8:87956668..87956735,-	87956708	p1@4921524J17Rik	[4921524J17Rik]	4921524J17Rik			4921524J17Rik	137.578	2179.29	1912.12	788.424	2526.53	1369.52			83.148	1252.95	433.826	201.989	1107.65	800.873	8913.46	3880.44	12793.9	2.5144	-0.481353	0.213257	1.27544	0.883695	-0.177758	4.88921	4.33423	2.30424	3.23692	-2.58497	-1.09731	0.147559	0.253835	1	ENSMUST00000047749	86	86	>1|GCGCGCCTCCACGGCTGGGTCGCGGCTGGAGTGAGGACGCGCTGTGTGGAGCAGCGGAGGCACGGCGCTGCTTCCACCGCTGCTCAGGAGGGGAGC|	-	-	87933670	-	-
chr8:87956742..87956758,-	87956747	p2@4921524J17Rik	[4921524J17Rik]	4921524J17Rik			4921524J17Rik	49.5283	633.227	457.831	132.787	663.323	308.355			10.14	240.358	22.3293	48.1809	262.523	118.515	2245.05	702.045	2947.1	1.41372	-0.569463	0.0669378	2.19386	2.38218	0.127005	4.4475	4.62852	2.86668	2.9704	-1.58082	-1.65812	-0.0464075	0.652763	1	ENSMUST00000047749	125	125	>1|CCCCTCCTCCAACCCGCACGCAGCCCCGCGCACGCGCACGCGCGCCTCCACGGCTGGGTCGCGGCTGGAGTGAGGACGCGCTGTGTGGAGCAGCGGAGGCACGGCGCTGCTTCCACCGCTGCTCAGGAGGGGAGC|	-	-	87933670	-	-
chr3:127256380..127256430,+	127256409	p1@4930422G04Rik	[4930422G04Rik]	4930422G04Rik			4930422G04Rik	18.3438	123.356	215.45	38.7296	154.544	236.051			57.798	79.7226	12.7596	24.0904	136.175	116.719	786.474	427.265	1213.74	1.05785	0.131452	0.324014	-1.24535	3.1441	0.768666	4.17043	0.673509	3.3175	3.36521	-0.852922	2.6917	0.265199	0.879959	2	ENSMUST00000043108|ENSMUST00000196141	233|130	181.5	>1|GGGAGAAATTAGAAAGTGGAGTTTATGTCATTGAGCCGGTGAAGTGGAGACTTTTCTCTCCCGTGTTCTAGGCAAGAAGGGTGGACAGACCGGGCGACTTGGCGCGGTTGGGAGAGCACTGGACACTGACTCGCCTCCACGGAAGCGACCCACGAGGCGCCGTTAGAGTGCCGGAGGATATAAATGCTGACTAAAAACTGATTGTTTTCTGGACCTGACTAGTTTATAATCTCAGAAGACACA|>2|GGGAGAAATTAGAAAGTGGAGTTTATGTCATTGAGCCGGTGAAGTGGAGACTTTTCTCTCCCGTGTTCTAGAGGATATAAATGCTGACTAAAAACTGATTGTTTTCTGGACCTGACTAGTTTATAATCTCAGAAGACACA|	-	|	127258282|127258282	-	-
chr10:100051839..100051903,-	100051868	p1@4930430F08Rik	[4930430F08Rik]	4930430F08Rik			4930430F08Rik	5.50314	161.733	314.198	41.496	133.707	246.684			10.14	126.128	172.255	16.678	25.2696	215.482	903.321	565.952	1469.27	2.80646	-0.348385	-0.273615	0.691063	0.322184	-2.29686	6.31041	4.81201	3.18105	3.8119	-3.12936	-1.00011	-0.190274	-0.260739	1	ENSMUST00000054471	119	119	>1|GCCTCTCTCCGGAGTGGACCTTGGTGGTGCAGTTAGGATCTTCTGGCTGGTGTTTGGATTCTAGCTCATTTCTGCAGACTTCCTCCGCCCGGGGCCCAGCGCAGTGGAGACAGGTTGCGCGTGGGCAAC|	-	-	100036199	-	-
chr8:27104575..27104616,-	27104596	p1@4930444A02Rik	[4930444A02Rik]	4930444A02Rik			4930444A02Rik	16.5094	93.2022	40.3969	58.0944	196.219	97.8229			7.098	135.647	60.6081	20.3842	61.77	55.6661	502.244	341.174	843.418	1.78443	1.26554	1.06998	1.45872	-0.121664	-1.12856	2.97889	4.69464	2.32964	2.49752	-0.649258	-2.19712	1.22738	-0.55952	1	ENSMUST00000061850	285	285	>1|CCGGCCGCGCAGGCGTCCTGGAATGCGAGCCGGATTTGGTGGTCGCCAGGCATTTTGTGAAAGAAGGAAGATCCTGTCTGCTGCATGGATAATGGACTGGAACACAGAAAGACCATGCAGGGTTCGGCTGTAGAAGGCCAGNNNNNNNNNNNNNNNNNNNNNNNNNNNNNNNNNNNNNNNNNNNNNNNNNNNNNNNNNNNNNNNNNNNNNNNTGAACCAAGCAGGTCACTGAGGGACACAGGCATGTGGATGGAAACCCTGCTGGGAGAAAAAAGAAACTGCTGAAGGGACTGAC|	-	-	27093345	-	-
chr16:64770742..64770797,-	64770764	p1@4930453N24Rik	[4930453N24Rik]	4930453N24Rik			4930453N24Rik	77.044	449.564	152.61	82.992	225.738	106.329			35.49	205.851	63.798	37.0622	146.002	43.0963	1094.28	531.299	1625.58	0.106624	-0.519267	-0.992286	0.0616853	-0.560567	-0.494181	2.95829	2.90809	1.99394	2.33559	-0.964355	-0.572495	-0.709882	-0.431296	1	-	-		-	-	-	-	ENSMUST00000076991	76	76
chr16:38522671..38522736,-	38522717	p1@4930455C21Rik	[4930455C21Rik]	4930455C21Rik			4930455C21Rik	36.6876	518.095	228.916	38.7296	197.955	182.886			6.084	115.419	54.2283	29.6498	110.905	113.128	1203.27	429.415	1632.68	0.0771211	-0.323079	-1.3858	2.19511	1.05396	-0.0573039	4.3292	4.69168	3.28107	2.89671	-1.04813	-1.79497	-0.900585	0.528394	1	ENSMUST00000002925	100	100	>1|TGTGAGGTTCAGTGTCCCCCAACGTGCCGCTAGTGGGCTGTACAGGTCACCCTCTCCCACGGTGCCCGCCGACCCTGGGGTGTCTGTCTCTCTGCGGGTAGGAGGGCGCC|	-	-	38499014	-	-
chr1:166205690..166205791,+	166205743	p1@4930455F23Rik	[4930455F23Rik]	4930455F23Rik			4930455F23Rik	7.33752	57.5661	197.496	35.9632	131.97	74.4304			11.154	65.444	79.7475	16.678	106.694	98.7624	504.763	378.48	883.243	2.21797	-1.40185	1.1899	0.559736	0.306791	0.700907	5.02713	3.64402	2.50442	3.5837	-2.52271	-0.0603156	-0.114365	0.505331	1	ENSMUST00000027867	173	173	>1|AGAAGGCCTCAGAGGCGCGCTGTTGCCATGGCACCCGGGTGCTGGGTGCTTCAGGAGCAGGCCCCGGGGTGTCACCGTTGCCTCGTTGTCAGAGCTTAGAAAAGGAGAAGAGAGCTCCTGCGGCCATCTCTGTGACCCCAGCCGCTGCATCTTCCACAGCATTATTCATTGATAAGTGGAAAA|	-	-	166208328	-	-
chr5:30950308..30950371,+	30950335	p1@4930471M23Rik	[4930471M23Rik]	4930471M23Rik			4930471M23Rik	9.1719	24.6712	112.214	8.2992	76.4037	180.76			1.014	52.3552	15.9495	7.41244	35.0966	14.3654	411.519	126.193	537.712		0.685396	1.61128		-0.146081	-0.570305	3.82828	5.50607	4.87197	2.65864	1.04369	-2.84743	0.859764	-0.283203	2	ENSMUST00000062962|ENSMUST00000196740	59|595	327	>1|AGGAGACTCCACATCCCGGGTGACCCGGGTTGGAGCTGCTGATTCAAGTGGTCTCTCGTGTCCACCACT|>2|AGGAGACTCCACATCCCGGGTGACCCGGGTTGGAGCTGCTGATTCAAGTGGTCTCTCGTGTCCACCACTATGGCCTGGACTAAGTACCAGTTGTTCCTGGCCGGGCTTATGCTGGTCACCGGCTCCATCAACACGCTTTCGGCAAACCACTTCTGCTGACCTTGAGCCAGCATGTCTGCCTGATTCAGTGCCAATGGCCGGTCTCATTTCAGAGCCTCACTGTCCAGATGCAACTAAGGTTCTCCAGGAGAAGAACCAAAGTCACACAGATCCTCAGAGCTCCCTCCTAAGCTCCTGAGGCCCCGCCCCCAGCTCCTAGGGGT…	Inr|Inr	|	30950394|30957876	-	-
chr12:92622810..92622837,-	92622830	p1@4930534B04Rik	[4930534B04Rik]	4930534B04Rik			4930534B04Rik	16.5094	120.615	412.946	11.0656	95.5046	46.7848			2.028	27.3675	15.9495	1.85311	19.6541	34.1179	703.425	100.97	804.395	-0.556494	-3.12825	-0.335197		1.07348	-0.467509	4.9726	4.11542	3.62598	4.52757	-1.34662	0.412147	-1.83935	0.291883	1	ENSMUST00000141429	449	449	>1|CTGGGCGGCTAGTTCAAGTTGCCATAGCTGCAAGTCCCGGGTGAGCGGAGTCGGTTGCGAGGCAGCGTTGGGTCAGTTGCACCTTCGGGGTCGCTGGTAGCCGCGGGAGCCGGGTGGGGCCTCGGTGATGATCCGGCGTTAAGAACTTGGAGTCACCTTGGGTCTAAGGTGTTTTGGAGGGAGTGTAGAGGCAACCCAAAAGATCATCTACTCGACTAGACCTCTTGCCCTGAACCTCATGAAGAAATGATAGGAGGCAGGTACCCTGAGCTCAAAGGACGGCAGCGCAGAGTTCTGGGAGTGCACTTTGAGTTCCACCAGATGCAGGAGTCTGAGCAATTCTCATTGCTCAGAGTGATTGAAATTAATAACAGAAGTCTTAGAGCGCACCTGTGA…	Inr	-	92237962	-	-
chr10:87609612..87609681,-	87609633	p1@4930547N16Rik	[4930547N16Rik]	4930547N16Rik			4930547N16Rik	16.5094	117.873	210.962	19.3648	85.0859	140.355			21.294	76.153	133.976	5.55933	53.3468	80.8056	590.15	371.135	961.284	0.22388	-0.586189	-0.467899	-1.8467	-0.72592	-0.50948	4.27515	3.2727	3.50766	4.47394	-0.767493	1.20124	-0.495545	-0.726037	4	ENSMUST00000048518|ENSMUST00000164121|ENSMUST00000168163|ENSMUST00000164803	397|41|194|124	189	>1|TGCGCTGCTCCTCCCTCCGCTTGCACCCAGCCTGGGTCACTGGACGAGGTGGGTCTGGTCTCTTCTGTGCCCCCGGGTCGCAGTTCCAGTGGGCATTCGGGCTGCTGCTCTGCGAACGCATCTCGGTGACAGCGACGTGCCAGCCAGTGGCGTTGTCTGCGCAGTGGCTTCGCCCCGACTTCACGGTGTCCCGTGGAAAAAAAGACGCTAGGGCTTCGGCAAGACCGAAACCCATCAAAATCTTCTTTTAGTCCGTTAGATCGGGGATCTGGCACACGACGAGTGCAGGCTTCTCAGATTTTCTGTCGTTGCATCCTTCAGAGGGCCATTCCGGACCAGGCAAGAAGAATAACTGTCACCTGTCATCTTTTAATGGAGATTTGCTAAGTGCTGGCA…	TOP|TOP|TOP|TOP	|||	87555599|87588954|87588974|87595895	-	-
chr3:79432996..79433037,+	79433008	p1@4930579G24Rik	[4930579G24Rik]	4930579G24Rik			4930579G24Rik	23.8469	142.545	67.3282	0	69.4579	76.557			24.336	185.623	35.0889	24.0904	94.0589	17.9568	379.735	381.154	760.889		0.184042	-1.03191	-0.0143361	-0.947275	-0.97697	3.11114	3.15492	8.1949	2.19396	5.08377	-0.960966	-0.676815	-0.845981	1	ENSMUST00000029388	90	90	>1|GGGAGGAGGCGGAGCCTATGGGCTTTGGGCGCGAGCGGTCGAAAGGCAGTTGGTGAGGGTTCGGTTGCTTGATCCGGTCCAGTAGCCCCAGCTCACTCCC|	-	-	79433098	-	-
chr3:79433039..79433056,+	79433045	p2@4930579G24Rik	[4930579G24Rik]	4930579G24Rik			4930579G24Rik	33.0188	197.369	112.214	19.3648	76.4037	106.329			4.056	210.611	12.7596	0	70.1932	14.3654	544.7	311.985	856.684	-0.754758	-0.0773556	-1.36342		0.164925	-1.57836	3.20961	5.61875	3.20539	7.41039	-0.00421791	1.79164	-0.760019	-1.42204	1	ENSMUST00000029388	53	53	>1|GTCGAAAGGCAGTTGGTGAGGGTTCGGTTGCTTGATCCGGTCCAGTAGCCCCAGCTCACTCCC|	-	-	79433098	-	-
chr9:15110560..15110603,-	15110582	p1@4931406C07Rik	[4931406C07Rik]	4931406C07Rik			4931406C07Rik	12.8407	30.1537	184.03	5.5328	123.288	202.025			9.126	33.3169	41.4687	20.3842	32.2889	96.9667	557.871	233.551	791.422		0.134246	2.01374	1.1174	1.2156	-0.0445391	4.00831	2.96737	5.75507	2.63531	1.74676	-0.332054	0.542316	0.830793	2	ENSMUST00000178977	195	195	>1|CCGGCTCTCCCTTGGCCTAGAGCTATCAGAAAAGACTGGCAGGAGACTAAACCTGTGTTCGAACCTGAGTGGAAAGAAGGCCTTCCTGCAAGTGGGAGGACACTGCGGGCCAGAGCCGGGACTGTTCCTGCTGGTGCCCCGTGAGCTCTCGTGGTGGTCAGCCAACAGCTGCGGTGTCTGAGCAGCCTTGCTGAGAGGAAGGAGA|	-	-	15089261	-	-
chr7:35098550..35098587,-	35098565	p1@4931406P16Rik	[4931406P16Rik]	4931406P16Rik			4931406P16Rik	119.235	1726.98	4017.25	514.55	1465.56	1050.53			62.868	1467.13	1907.56	589.289	1259.27	1344.96	8894.11	6631.08	15525.2	2.10487	-1.93458	-0.236725	3.21837	-0.504003	-0.220337	5.58433	5.73507	2.28869	2.14286	-3.29564	-3.59221	-0.952013	-0.106223	1	ENSMUST00000108074	818	818	>1|NNNNNACGTCACTTCCGGTGTACACAGCCGGTCCGGGCGGTGCGCCGGAGCCGGGGCGCTTCGCAGGTGAGGAAATGACTTAGAGGCCTTATGAATACATCTGTGCTTTCTTGCTTCAGACTTTACAACTGCAGGCCAACCCAGTCTGGAAGCACTTTTTATTAATGTTACAAGGAAACCGCTACCTCAGCAAACAAAAGAAAGGAGAAGACACACAATAACAAATGCCATGTTTAAAGAAAACTTGTTCCCAGAAACCTTTACAGGAGATTTGGAAGTTTTTAGCACTGAGAAGCAGCTTTCCAGGTAAATGGATTTGACAGGCAGGCTCTGTCAGAATTCTGCAGAGGTGTGTTCTTCCTTCAGGACTTCTTGTGAAGTAACCCCTTCCGCCTA…	InrAC	-	35023947	-	-
chr7:35098527..35098547,-	35098541	p2@4931406P16Rik	[4931406P16Rik]	4931406P16Rik			4931406P16Rik	38.522	581.143	888.732	105.123	427.166	214.785			10.14	774.618	491.245	216.814	489.949	432.759	2255.47	2415.52	4671	1.43657	-2.04631	-0.443649	4.35221	-0.18268	-0.660315	5.23575	6.89505	2.60466	2.08687	-2.63109	-4.80817	-1.01321	-0.163136	1	ENSMUST00000108074	794	794	>1|CAGCCGGTCCGGGCGGTGCGCCGGAGCCGGGGCGCTTCGCAGGTGAGGAAATGACTTAGAGGCCTTATGAATACATCTGTGCTTTCTTGCTTCAGACTTTACAACTGCAGGCCAACCCAGTCTGGAAGCACTTTTTATTAATGTTACAAGGAAACCGCTACCTCAGCAAACAAAAGAAAGGAGAAGACACACAATAACAAATGCCATGTTTAAAGAAAACTTGTTCCCAGAAACCTTTACAGGAGATTTGGAAGTTTTTAGCACTGAGAAGCAGCTTTCCAGGTAAATGGATTTGACAGGCAGGCTCTGTCAGAATTCTGCAGAGGTGTGTTCTTCCTTCAGGACTTCTTGTGAAGTAACCCCTTCCGCCTAAATGCTGTTGACCAGCTGGGGTCC…	-	-	35023947	-	-
chr3:36762024..36762069,+	36762045	p1@4932438A13Rik	[4932438A13Rik]	4932438A13Rik			4932438A13Rik	1.83438	131.58	345.618	27.664	138.916	242.431			6.084	111.85	130.786	9.26555	65.9816	109.536	888.042	433.503	1321.55	3.59274	-0.510719	0.0779867		-0.25473	-0.756969	7.67691	5.20665	3.76107	4.17188	-3.91585	-1.03477	-0.227727	-0.427682	1	ENSMUST00000057272	354	354	>1|ATACGCTGCCAGTTGACGCAGCTGCGGTGCCGCTGGCCTCCACTCCTGCCTCGGCTCTACTCCTCCGCCCCATGGGTGTCCGAGGCGGCGGGCCGAGCTGGACGTGCTACAGGCTGAGGGTGTAAGCATCAGCGGAGGTCCCGACTCGGGGCTGTTGTGCTGTCAAGTGAGAGGAGCTCGAGAGGCTGCGCGCGGTGAGGGCTGGGAGGTGGCGAGGTGGGCAGCGCCTTTCCGGACTTGTTAAGATGAAGCGCTGCAGAAGGACCTTCAGAAGAGGAAAGATAAACAACATTGAAGATTAAAAAACTAAACAAAATAAAACAAGAAATCTTGTGCCTTTAGATGTTCTGGAATAACACCAGTG|	-	-	36768949	-	-
chr18:68459848..68459882,-	68459863	p1@4933403F05Rik	[4933403F05Rik]	4933403F05Rik			4933403F05Rik	16.5094	205.593	462.32	60.8608	375.073	616.709			17.238	120.179	232.863	31.5029	115.117	246.008	1737.07	762.907	2499.97	1.85098	0.415309	0.865796	0.851358	0.0790614	-0.0618217	5.29633	4.31696	4.01536	3.49822	-1.28097	-0.818743	0.620688	0.0844368	2	ENSMUST00000152193	336	336	>1|GGAGCACGTTGCTAGTGGGCGCGGCTGGCCCTGGGTGGTGGAGGCCTAGTGTTTGCTCGTCCTCCGCTCGGCCGGGTGGCCCTGCCGAGGCAGTTCCTCACGGCCCGTGCGGCGGGAATCCGTGGAGACGTCCCCACATCCTGAGAGCTGCCCAGGGGAAGAAGGTGGAGAAGAGGAAAGTGTGTGGTGTGTGAGCAGCCCCATGAAGGAGAGGAAGGCTTCAAAGAGAGGGGGAGAAGCCCAAACGAGAGAAGACCAGCATCTGAGAGAGACAGAGGAGAAGGAGGGCAGACTCAACAGACCTTGATGTTTCTGTAGAAGCTGAAACCCATCACTGTCCTTCAAA|	-	-	68435570	ENSMUST00000042852	174	174
chr18:68459803..68459847,-	68459826	p2@4933403F05Rik	[4933403F05Rik]	4933403F05Rik			4933403F05Rik	7.33752	202.852	287.267	49.7952	451.476	433.823			8.112	63.0642	60.6081	22.2373	61.77	215.482	1432.55	431.273	1863.82	2.68195	0.593869	1.15227	1.40064	1.82147	-0.0296761	5.96806	3.84985	4.13849	3.61066	-1.82957	-0.23919	0.909865	1.18127	2	ENSMUST00000152193	299	299	>1|GTGGAGGCCTAGTGTTTGCTCGTCCTCCGCTCGGCCGGGTGGCCCTGCCGAGGCAGTTCCTCACGGCCCGTGCGGCGGGAATCCGTGGAGACGTCCCCACATCCTGAGAGCTGCCCAGGGGAAGAAGGTGGAGAAGAGGAAAGTGTGTGGTGTGTGAGCAGCCCCATGAAGGAGAGGAAGGCTTCAAAGAGAGGGGGAGAAGCCCAAACGAGAGAAGACCAGCATCTGAGAGAGACAGAGGAGAAGGAGGGCAGACTCAACAGACCTTGATGTTTCTGTAGAAGCTGAAACCCATCACTGTCCTTCAAA|	-	-	68435570	ENSMUST00000042852	137	137
chr8:47249029..47249083,+	47249040	p1@4933411K20Rik	[4933411K20Rik]	4933411K20Rik			4933411K20Rik	11.0063	134.321	520.671	41.496	72.9308	219.038			14.196	51.1653	149.925	5.55933	35.0966	134.676	999.463	390.619	1390.08	1.86783	-1.24729	-0.876586		-0.154208	-0.537455	5.83208	3.77793	2.79996	4.81254	-3.03212	1.03461	-0.996904	-0.295408	4	ENSMUST00000034048|ENSMUST00000145229|ENSMUST00000110376	79|328|193	200	>1|GCGCGTGCGCAGAGCGAGCGAGAACCCGAACGCTCCGCGGGGCGCAAGAGTCCGTGGCGGCCACAGTTCGCAGATACACTTTTGGCGTC|>2|GCGCGTGCGCAGAGCGAGCGAGAACCCGAACGCTCCGCGGGGCGCAAGAGTCCGTGGCGGCCACAGTTCGCAGGTGAGCGGCGCTCGGGCTTCCGCATCCGGTCGGTCTCCAGCGGGCGAGACGGCCCTCCCCTGCGTTCGGGGTCCGTTTCCCCGGTTCAGTGCCCGACGGAGGCGAGCACCCGGGGAGGCAGAGTAAGAACCTGGGCTGAGCCTTAAATCTCCAGACCTCTTTGTGGGATAAACNNNNNNNNNNNNNNNNNNNNNNNNNNNNNNNNNNNNNNNNNNNNNNNNNNNNNNNNN…	-	||	47254928|47254928|47254928	-	-
chr10:116387609..116387681,+	116387625	p1@4933412E12Rik	[4933412E12Rik]	4933412E12Rik			4933412E12Rik	154.088	213.817	148.122	11.0656	52.0934	97.8229			4.056	96.3811	98.8869	5.55933	73.0009	19.7525	677.009	297.637	974.645	-3.74052	-0.596048	-2.02679		-2.29496	-0.398453	1.22931	5.42523	3.70105	3.94393	2.47174	-1.48131	-1.67747	-1.01596	0	-	-		-	-	-	-	-	-
chr3:106524816..106524872,+	106524843	p1@4933421E11Rik	[4933421E11Rik]	4933421E11Rik			4933421E11Rik	5.50314	24.6712	67.3282	19.3648	31.2561	46.7848			42.588	64.2541	51.0384	0	98.2705	73.6229	194.908	329.774	524.682		-0.520506	0.335259	-6.42921	0.524271	0.609109	3.94565	1.42618	1.98323	8.42956	-1.96242	7.00338	-0.00142514	0.12231	6	ENSMUST00000106736|ENSMUST00000154973|ENSMUST00000098750|ENSMUST00000150513	193|186|119|299	199.25	>1|ATCTCCCGTCACACCCTTCTGTTCGCTCGCCTCAGACGCTGCCCTTCCACACCCGTGCTCTGGTTCGCGCCTACTTGGGGACGCTGTCCCCCCAGTATTCACTGCCCTATCCCCTCCCACCCATCTAAAATGTCTAATAGTCTCCAGAGCGTCATTCTGAAAACCGCAGAGGAAAAGTCAGGCTCGCGCTGACGCAGTATGAG|>2|ATCTCCCGTCACACCCTTCTGTTCGCTCGCCTCAGACGCTGCCCTTCCACACCCGTGCTCTGGTTCGCGCCTACTTGGGGACGCTGTCCCCCCAGTATTCACTGCCCTATCCCCTCCCACCCATCTAAAATGTCTAATAGTCTCCAGAGCGTCATTCTGAAAACCGCAGAGGAAAAGTCAGGCTCGCGC…	Inr|Inr|Inr|Inr	|||	106537287|106534593|106524962|106534593	-	-
chr6:146526278..146526321,-	146526313	p1@4933424B01Rik	[4933424B01Rik]	4933424B01Rik			4933424B01Rik	475.104	611.297	668.793	33.1968	241.366	189.266			496.86	911.456	344.509	216.814	141.79	1.79568	2219.02	2113.22	4332.25	-3.81908	-1.81842	-1.33884	-1.19451	-7.23157	-2.68013	1.42897	1.33701	3.67745	-0.592851	2.24847	-1.92986	-1.91882	-2.28042	1	ENSMUST00000032427	503	503	>1|TGCCGCTCGCACACTCTCGCGTGTTTTCCGAGGGGCTACCGGCCCGGACTGGAGGCGGAGAGGGGAGGTTGGGTGGGTAGGCTCTGCCTGTCCAGAGCCGAGGCTGGCTTGTCCCGGCCGTGGCTTAGTACTTTGTGGGGGGATCTCTCGGGTCGTCCTGACCGTTCTTCCCTACGGTTGATTGGGAACAAATGTTAAAGGCTTTTTTTTTCCCCTCACTTGCTCCGCCCTCTTCCGGTTCGGCCTCTGGTGGCTTCTAAGGAGAAGGGAAGATGGCGGGGCTNNNNNNNNNNNNNNNNNNNNNNNNNNNNNNNNNNNNNNNNNNNNNNNNNNNNNNNNNNNNNNNNNNNCCCTGCGTTTAAGCAGCCGGAGTGTTGGGAGATGAGCCGGGCAGTC…	-	-	146498467	-	-
chr6:146525952..146525994,-	146525967	p2@4933424B01Rik	[4933424B01Rik]	4933424B01Rik			4933424B01Rik	9.1719	16.4475	255.847	2.7664	34.729	55.2912			0	5.94945	79.7475	0	21.058	30.5266	374.253	137.281	511.534		-2.19999	1.05569		-1.37095	1.74097	4.81787	7.42956	4.79247	6.70278	-0.0254057	-0.726782	-1.59578	-0.726782	1	-	-		-	-	-	-	ENSMUST00000032427	157	157
chr11:72020715..72020781,-	72020768	p1@4933427D14Rik	[4933427D14Rik]	4933427D14Rik			4933427D14Rik	16.5094	71.2723	103.237	19.3648	65.985	57.4178			6.084	33.3169	41.4687	35.2091	18.2502	41.3006	333.786	175.63	509.415	0.22388	-0.840846	-0.110398	2.43925	-0.00578875	-0.850837	3.36302	3.51534	2.64092	0.749894	-0.722099	-2.76544	-0.418769	0.22738	1	-	-		-	-	-	-	ENSMUST00000108505	122	122
chr3:89856843..89856858,+	89856849	p1@4933434E20Rik,p1@Gm7664	[4933434E20Rik, Gm7664]	4933434E20Rik, Gm7664	4933434E20Rik		4933434E20Rik	3.66876	109.65	80.7938	102.357	142.389	36.1519			2.028	49.9754	22.3293	31.5029	102.482	28.7309	475.01	237.048	712.058	4.62488	-1.14926	0.375427	3.66213	0.356607	1.02874	5.51738	4.84796	0.79965	2.04112	-4.71773	-2.80684	0.532007	1.12504	5	ENSMUST00000029552|ENSMUST00000162114|ENSMUST00000068798	126|126|126	126	>1|NNNNNNNNNAATCGAAAACCATATGGAAATGTTCGGAGAGCTCCAGGGAACCTAGGTTCCCTGGCTTCGGCAGAGCCTGGGCTAACGCGCGAGCGCGGCGGGACTGTCCTAGCAGGTGTTCCCGGAGAGAGAGGCG|>2|NNNNNNNNNAATCGAAAACCATATGGAAATGTTCGGAGAGCTCCAGGGAACCTAGGTTCCCTGGCTTCGGCAGAGCCTGGGCTAACGCGCGAGCGCGGCGGGACTGTCCTAGCAGGTGTTCCCGGAGAGAGAGGCG|>3|NNNNNNNNNAATCGAAAACCATATGGAAATGTTCGGAGAGCTCCAGGGAACCTAGGTTCCCTGGCTTCGGCAGAGCCTGGGCTAACGCGCGAGCGCGGCGGGACTGTCCTAGCAGG…	-	||	89856975|89856975|89856975	ENSMUST00000159064|ENSMUST00000160640	126|126	126
chr3:89856746..89856779,+	89856773	p2@4933434E20Rik,p2@Gm7664	[4933434E20Rik, Gm7664]	4933434E20Rik, Gm7664	4933434E20Rik		4933434E20Rik	71.5408	792.219	421.923	235.144	298.669	112.709			37.518	83.2923	86.1273	100.068	58.9623	52.0747	1932.2	418.043	2350.25	1.70972	-1.8997	-1.40585	1.40342	-0.720452	-0.494843	4.07557	2.1601	0.805608	0.149352	-3.26996	-2.01075	-0.991209	0.0286959	5	ENSMUST00000160640|ENSMUST00000029552|ENSMUST00000162114|ENSMUST00000068798	202|202|202|202	202	>1|GGGAAGGTCCGATGCTTAACTAGCGCCCCCATCCACCATGTTTTCTGACGGACTCTAGCCTGGNNNNNNNNNNNNNNNNNNNNNNAATCGAAAACCATATGGAAATGTTCGGAGAGCTCCAGGGAACCTAGGTTCCCTGGCTTCGGCAGAGCCTGGGCTAACGCGCGAGCGCGGCGGGACTGTCCTAGCAGGTGTTCCCGGAGAGAGAGGCG|>2|GGGAAGGTCCGATGCTTAACTAGCGCCCCCATCCACCATGTTTTCTGACGGACTCTAGCCTGGNNNNNNNNNNNNNNNNNNNNNNAATCGAAAACCATATGGAAATGTTCGGAGAGCTCCAGGGAACCTAGGTTCCCTGGCTTCGGCAGAGCCTGGGCTAACGCGCGAGCGCGGCGGGAC…	-	|||	89856975|89856975|89856975|89856975	-	-
chr10:81546057..81546110,+	81546064	p1@4933439G19Rik	[4933439G19Rik]	4933439G19Rik			4933439G19Rik	40.3564	276.865	565.557	110.656	310.824	699.646			36.504	253.447	114.836	46.3277	127.752	213.686	2003.9	792.552	2796.46	1.44395	0.30671	0.16663	0.339682	0.893016	-0.985548	4.36677	3.31702	3.18508	2.8683	-1.18168	-0.448722	0.344652	-0.061901	0	-	-		-	-	-	-	-	-
chr19:29436320..29436384,-	29436335	p1@5033414D02Rik	[5033414D02Rik]	5033414D02Rik			5033414D02Rik	80.7127	474.235	314.198	74.6928	140.652	208.405			37.518	170.154	98.8869	7.41244	146.002	258.578	1292.9	718.551	2011.45	-0.111111	-0.59112	-1.74987	-2.26449	1.38226	-0.220157	3.28013	2.82575	2.21686	5.67794	-1.06326	2.85219	-1.03551	0.42585	5	ENSMUST00000152936|ENSMUST00000126800	167|299	233	>1|ATCGCTCTGGAGCTCTGGCTAGAGGCCTCTGCTGCGGTCACCGTCCCCGCACCGTGTCGCGTGAGATCTCCAGAGGGACACTCCTGTTTGCCTTCTATATTTAACCGTGTACCTGAGATTTCCCCCGACACATCCAAAGTCCAAGTCCAAGAGAGCAAGGCCCAGAAGGAGGTCAAG|>2|ATCGCTCTGGAGCTCTGGCTAGAGGCCTCTGCTGCGGTCACCGTCCCCGCACCGTGTCGCGTGAGTGTTTCGGGTCACAGACACCTGGGAGGGAGGGGTCGGCTCCGTCGCACGGTCCCGCACAGCTGCAGCTCTGGCTGGGCAGGGAAGGCCAGGGCTCTGGGTTCTTGCTGATGCCTCCGAGGCTGACAGGTGAGATCTCCAGAGGGACACTC…	-	|	29423435|29425617	ENSMUST00000143467|ENSMUST00000016639|ENSMUST00000138051	167|265|167	199.667
chr13:58259003..58259050,+	58259020	p1@5133401N09Rik	[5133401N09Rik]	5133401N09Rik			5133401N09Rik	53.197	117.873	94.2594	30.4304	60.7757	21.2658			4.056	55.9248	9.5697	29.6498	44.9237	8.9784	377.802	153.102	530.904	-0.795817	-2.1222	-0.949958	2.72631		-0.312887	1.98545	3.85651	1.41609	0.851515	-0.569356	-3.00499	-1.23454	0.262883	2	ENSMUST00000051490|ENSMUST00000109868	27|27	27	>1|CCCCGGAAGCGGGCGCTGAGGACCTGGGAGCACGGTC|>2|CCCCGGAAGCGGGCGCTGAGGACCTGGGAGCACGGTC|	-	|	58259047|58259047	-	-
chr16:50732820..50732888,-	50732849	p1@5330426P16Rik	[5330426P16Rik]	5330426P16Rik			5330426P16Rik	45.8595	211.076	184.03	107.89	74.6673	255.19			12.168	39.2664	79.7475	5.55933	108.098	73.6229	878.712	318.462	1197.17	1.22529	0.470539	-1.493		-0.114537	1.44937	3.09313	3.23792	1.6078	4.91038	-1.48533	1.67247	-0.0105564	0.511985	0	-	-		-	-	-	-	-	-
chr18:78135191..78135216,+	78135204	p1@5430411K18Rik	[5430411K18Rik]	5430411K18Rik			5430411K18Rik	18.3438	169.957	498.228	55.328	163.226	469.975			9.126	73.7732	318.99	7.41244	92.655	219.073	1375.06	721.03	2096.09	1.5669	-0.0841361	-0.0581234		-0.54107	0.326792	5.14917	5.35241	3.50474	5.30233	-1.64442	-0.0500813	0.0041937	-0.332142	1	ENSMUST00000044622	34	34	>1|GGAGTTTGACAGAAACAGACCGCGACGTCGCGGAGGTAGGGTGT|	-	-	78135238	-	-
chr18:78135160..78135190,+	78135184	p2@5430411K18Rik	[5430411K18Rik]	5430411K18Rik			5430411K18Rik	11.0063	87.7197	152.61	11.0656	15.628	74.4304			2.028	10.709	114.836	0	33.6927	39.505	352.461	200.771	553.232		-1.03095	-2.45153		-1.5276	1.60903	4.38752	5.6398	2.96901	7.20355	-1.41851	1.56374	-1.30925	-0.797279	1	ENSMUST00000044622	54	54	>1|GGCGGCTTGCGTGAATTGCAGGAGTTTGACAGAAACAGACCGCGACGTCGCGGAGGTAGGGTGT|	-	-	78135238	-	-
chr5:100858550..100858566,-	100858561	p1@5430416N02Rik	[5430416N02Rik]	5430416N02Rik			5430416N02Rik	47.6939	38.3774	40.3969	138.32	333.398	40.4051			29.406	19.0382	0	38.9153	71.5971	25.1395	638.591	184.096	822.687	1.52629	0.000289294	3.1024	0.398321	5.6803	1.88364	0.718003	-0.614135	1.43099	1.30274	0.712989	1.91688	2.01343	1.47601	0	-	-		-	-	-	-	-	-
chr8:73920752..73920790,+	73920775	p1@5430437P03Rik	[5430437P03Rik]	5430437P03Rik			5430437P03Rik	254.979	1132.13	1324.12	843.752	1739.92	1469.47			472.524	536.64	1882.04	75.9775	2493.26	1549.67	6764.37	7010.12	13774.5	1.72447	0.150207	0.619756	-2.62881	-0.280253	2.21495	3.26548	2.35453	1.92678	5.7244	-1.3387	3.36987	0.580004	0.510518	1	ENSMUST00000002473	194	194	>1|GCACAAACTTCCGGCCAGGAAGATGGCGGCTTCCTAGAGTCCTGATTGACTGGCCGCGGTGCCCAGGCTACAGAGTGGAACCTGCGGCACTGTGAACGCGCGTGAGCTTTGTGTCGCCGTGGTCTAACTTCGACCCGGATTGCTGTAGCTCCAGGCAGGATCCTGGCTTCCACTATCCCCCCTTCATCTAACCACTCGGGAACC|	-	-	73921627	-	-
chr16:4789887..4789949,-	4789929	p1@5730403B10Rik	[5730403B10Rik]	5730403B10Rik			5730403B10Rik	27.5157	87.7197	318.687	80.2256	93.7682	372.152			24.336	9.51912	92.5071	3.70622	35.0966	100.558	980.068	265.723	1245.79	1.52679	0.22343	0.0956696	-2.56184	0.119772	1.82898	3.86039	2.04549	2.53053	5.01658	-1.32986	2.97109	0.33151	0.14073	3	ENSMUST00000004173|ENSMUST00000117713	189|189	189	>1|GTGCGGGGGCGGTGAGTGCTGCGAGTCCTCTGGTAGAGGGGCTCCTCGGAGCAGCGGGCCGGACCACTGCAGATCTCTGTCCCTCTGGCCTCAGGCTTCTGGATTTCGAGCCTCCTAGATCTGCCTCCGCTGAATTACTCTCACCTACTTCTGTTCTCTGCACCAGAAATCTGAGATCCAGGAGTATCAGCAGGCAAAG|>2|GTGCGGGGGCGGTGAGTGCTGCGAGTCCTCTGGTAGAGGGGCTCCTCGGAGCAGCGGGCCGGACCACTGCAGATCTCTGTCCCTCTGGCCTCAGGCTTCTGGATTTCGAGCCTCCTAGATCTGCCTCCGCTGAATTACTCTCACCTACTTCTGTTCTCTGCACCAGAAATCTGAGATCCAGGAGTATCAGCAG…	-	|	4768537|4768537	-	-
chr17:5440229..5440263,-	5440237	p1@5730437N04Rik	[5730437N04Rik]	5730437N04Rik			5730437N04Rik	254.979	718.205	430.9	157.685	204.901	70.1773			170.352	800.796	95.697	105.627	488.545	131.085	1836.85	1792.1	3628.95	-0.691593	-2.60971	-1.80696	-0.686952	0.451927	-0.712369	2.16986	2.39235	0.80085	2.54677	-1.36901	0.154424	-1.69683	-0.556469	3	ENSMUST00000005053|ENSMUST00000188282|ENSMUST00000185896	21|21|21	21	>1|TAACGGAAACAGTAGAGTAGGAGACTTTAAA|>2|TAACGGAAACAGTAGAGTAGGAGACTTTAAA|>3|TAACGGAAACAGTAGAGTAGGAGACTTTAAA|	-	||	5411368|5432717|5433345	-	-
chr19:38298586..38298673,-	38298608	p1@5730455O13Rik	[5730455O13Rik]	5730455O13Rik			5730455O13Rik	132.075	1225.34	2545	235.144	3130.82	2111.7			113.568	561.628	835.754	157.514	484.333	578.209	9380.07	2731.01	12111.1	0.829796	-0.269206	1.353	0.470161	-0.531103	-0.213411	4.83	3.61528	4.47572	2.75007	-0.354286	-0.865205	0.489139	-0.308394	1	ENSMUST00000067167	158	158	>1|AGGGCCAGGCGTGCAGCGTGCGGTGACAGTGGCGCGGGCGGCGGCGCTGCGTGGCTCTGGAGGACCGGCGCGGACCTGCAGCGGCTCGCTGAGGCCGTGGCTCGTCGCTGCAGCTGTCAGGACTCTTGGGGGCGAACTTGCCAGACAGAGAAGAGCGGAAGGGAAGGG|	-	-	38263247	-	-
chr19:38298555..38298585,-	38298579	p2@5730455O13Rik	[5730455O13Rik]	5730455O13Rik			5730455O13Rik	3.66876	65.7898	121.191	27.664	173.645	97.8229			12.168	85.6721	9.5697	5.55933	29.4811	71.8272	489.781	214.277	704.058	2.75616	-0.30762	1.39343		2.84452	-1.52317	5.49098	2.91796	3.27151	4.07055	-2.21947	1.15259	0.648491	-0.00726594	1	ENSMUST00000067167	129	129	>1|TGGCGCGGGCGGCGGCGCTGCGTGGCTCTGGAGGACCGGCGCGGACCTGCAGCGGCTCGCTGAGGCCGTGGCTCGTCGCTGCAGCTGTCAGGACTCTTGGGGGCGAACTTGCCAGACAGAGAAGAGCGGAAGGGAAGGG|	-	-	38263247	-	-
chr11:80191477..80191527,-	80191507	p1@5730455P16Rik	[5730455P16Rik]	5730455P16Rik			5730455P16Rik	86.2159	381.033	525.16	60.8608	1159.95	893.165			15.21	203.471	172.255	42.6215	196.541	215.482	3106.38	845.58	3951.96	-0.498979	0.765606	1.6048	1.45673	0.322184	-0.0498698	3.38625	4.58184	5.0647	3.25799	1.67846	-1.32385	1.09057	0.217548	3	ENSMUST00000179332|ENSMUST00000103225|ENSMUST00000134274	25|25|53	34.3333	>1|TGACGGGGACACAGGGCCCCGAGGAGGTTGCCGCG|>2|TGACGGGGACACAGGGCCCCGAGGAGGTTGCCGCG|>3|TGACGGGGACACAGGGCCCCGAGGAGGTTGCCGCGATGCTCCCGTCTTTGCAGGAATCGCTGG|	-	||	80177313|80177313|80183919	-	-
chr18:25327116..25327232,-	25327194	p1@5730494M16Rik	[5730494M16Rik]	5730494M16Rik			5730494M16Rik	34.8532	287.83	327.664	22.1312	114.606	95.6963			21.294	95.1912	79.7475	22.2373	88.4434	96.9667	882.78	403.88	1286.66	-0.643529	-1.77036	-1.32477	0.0611312	0.280453	-0.105498	4.123	3.00896	3.2195	3.03147	-0.9035	0.0225074	-1.4824	0.0813693	2	ENSMUST00000148255	86	86	>1|CGGGCGCGTCAGCCGGCAGGCCGGCTGTCCACGGCGGCGCCGGGGACTGGGNNNNNNNNNNNNNNNNNNNNNNNGCGCGGTGTGAGGACGCGTGCC|	-	-	25288335	ENSMUST00000115817	86	86
chr4:46402263..46402328,-	46402306	p1@5830415F09Rik	[5830415F09Rik]	5830415F09Rik			5830415F09Rik	23.8469	19.1887	76.3052	66.3936	39.9383	138.228			5.07	20.2281	66.9879	1.85311	7.01932	50.279	363.901	151.437	515.338	1.45813	0.852982	1.03836		-0.410396	-1.46292	1.9792	3.97709	1.41733	4.61839	-0.561876	0.641297	1.03201	-0.63735	2	ENSMUST00000086563|ENSMUST00000030015	42|42	42	>1|GCGGAAGCGGAAATCAGCGTTGGGCGCGCGGACGACTCAGCGGCCTGTAACC|>2|GCGGAAGCGGAAATCAGCGTTGGGCGCGCGGACGACTCAGCGGCCTGTAACC|	-	|	46389907|46392922	-	-
chr9:15162136..15162203,-	15162175	p1@5830418K08Rik	[5830418K08Rik]	5830418K08Rik			5830418K08Rik	14.675	249.453	332.152	44.2624	418.484	304.102			24.336	190.382	162.685	35.2091	353.774	179.568	1363.13	945.954	2309.08	1.56059	-0.127092	0.745238	0.523858	0.142034	0.89218	5.26151	3.83148	4.01381	3.90205	-1.2477	0.070569	0.362681	0.59054	2	ENSMUST00000098979|ENSMUST00000161132	-11|133	66.5	>1||>2|TGACGGAAGTGACGAGAGCCGGGTCATGGCTGTCCCGCAGGTACCCAAACGGCTGCTGGGTAGCCGGCCGGGTGCGGGTGCCTGTGTGTCGTGAGGCCAGACCACACACGCTGTCAGATCCTTTATATTTAACATACTCAGAA|	-	|	15121540|15121540	-	-
chr4:94223428..94223493,-	94223486	p1@5830433M19Rik	[5830433M19Rik]	5830433M19Rik			5830433M19Rik	18.3438	131.58	94.2594	5.5328	170.172	267.95			13.182	72.5833	47.8485	11.1187	70.1932	68.2358	687.837	283.161	970.999		1.50231	0.369818		0.507591	-0.0479702	3.58632	3.14384	6.184	3.57983	2.59768	0.43599	0.860148	0.161964	1	ENSMUST00000030313	92	92	>1|AAGTGACGCCAAGTCTGCGACAGCAGCGCCGGCCGCTACGGAAGCGGGGTTCTGTTGCTGCAGAGACGGTCGGCTGTCGCCGATGGTTGCAGCGCGAGGACC|	-	-	94167715	-	-
chr6:128312879..128312944,-	128312928	p1@5930416I19Rik	[5930416I19Rik]	5930416I19Rik			5930416I19Rik	201.782	858.009	825.892	163.218	479.26	640.102			67.938	505.703	500.814	38.9153	231.638	190.342	3168.26	1535.35	4703.61	-0.305157	-0.367399	-0.839521	-0.796042	-1.39334	-1.12474	3.0578	3.87915	2.77404	3.42205	-0.283758	-0.457094	-0.555859	-1.2202	3	ENSMUST00000112152|ENSMUST00000057421|ENSMUST00000112151	755|628|157	513.333	>1|GCCAATCGGCACCGGCTTGTCTCCGGGTTCCGGCCCCGAACGCTCGGTGTCCTGAGGANNNNNNNNNNNNNNNNNNNNNNNNNNNNNNNNNNNNNNNNNNNNNNNNNNNNNNNNNNNNNNNNNNNNNNNNNNNNNNNNNNNNNNNNNNAGCAGCCTGCTCCGCCCCGCCCCGGACCGCCCTGCCTCAGTGGTCGACTTCCTTCCGGGACAGCGTACGCCACTTCCCCGGGCTGGCTACCCACTCGGTTACCCCTGGGTCCCCCGCCCCGCTCAGTCCACGCGGCTCCGTGGGGTCCGGCTTGGGTTTCTGGCCCTAGACTTGCGGTTACGTGGCTCCGCCCCGCTCCGGTCTGTGGCCGCCTCCTCCCGGGCCCCAGCCCCCGAGGTGTCCGGACG…	-	||	128307668|128307668|128307668	-	-
chr14:62175560..62175578,-	62175570	p1@6330409N04Rik	[6330409N04Rik]	6330409N04Rik			6330409N04Rik	45.8595	841.561	457.831	71.9264	413.275	299.848			24.336	234.408	54.2283	5.55933	129.155	62.8488	2130.3	510.536	2640.84	0.643651	-0.609755	-1.02508	-2.0352	0.21103	-0.857415	4.80938	3.54125	3.30057	4.98959	-1.50881	1.44834	-0.776639	-0.662376	2	ENSMUST00000100496	108	108	>1|ACCTCGCCTCAGTCTCCGCTTCGCCTCCCGGCCCTGGCGTCGCTGTGCGGGCTGCGAGGCTCCCGCGACCCAGAAGCACTCGGGCGCGGGCGGAGCGGTGGGGCTGTGTAGCTACGCC|	Inr	-	62153976	ENSMUST00000022497	108	108
chr14:62175583..62175618,-	62175593	p2@6330409N04Rik	[6330409N04Rik]	6330409N04Rik			6330409N04Rik	23.8469	446.822	242.381	118.955	203.164	80.8102			9.126	66.6338	12.7596	20.3842	64.5777	1.79568	1115.98	175.277	1291.26	2.29466	-1.57874	-1.13512	1.1174		-0.044876	4.82416	3.05307	1.25183	1.67902	-3.57233	-1.37405	-0.822698	-0.0288391	2	ENSMUST00000100496	131	131	>1|GGTCCTCGCTCCTTCGCCGGGGGACCTCGCCTCAGTCTCCGCTTCGCCTCCCGGCCCTGGCGTCGCTGTGCGGGCTGCGAGGCTCCCGCGACCCAGAAGCACTCGGGCGCGGGCGGAGCGGTGGGGCTGTGTAGCTACGCC|	TOP	-	62153976	ENSMUST00000022497	131	131
chr2:144353077..144353160,-	144353137	p1@6330439K17Rik	[6330439K17Rik]	6330439K17Rik			6330439K17Rik	9.1719	21.9299	53.8625	47.0288	15.628	142.481			0	23.7978	19.1394	24.0904	81.4241	64.6445	290.102	213.096	503.199	2.29693	1.39514	-0.475855		1.72989	1.75346	2.97967	6.44086	1.7386	2.57541	-1.24107	-3.86545	1.26671	1.97411	2	ENSMUST00000163701|ENSMUST00000081982	131|131	131	>1|GGTTCGCAGCGTCTGTGGAAACGCAAGCTGCAGCGGAGGAGCTGTGGTGAGACCGTGAGAAACCTGACAACGGGTTGGCGGCGGCGGTGCTGCGTCGGGGGTCCTTAATCTCTGTCCTTGAGGCTGGAGAAGGGAGAAAAC|>2|GGTTCGCAGCGTCTGTGGAAACGCAAGCTGCAGCGGAGGAGCTGTGGTGAGACCGTGAGAAACCTGACAACGGGTTGGCGGCGGCGGTGCTGCGTCGGGGGTCCTTAATCTCTGTCCTTGAGGCTGGAGAAGGGAGAAAAC|	-	|	144300659|144300659	-	-
chr7:125856087..125856130,+	125856112	p1@6330503K22Rik	[6330503K22Rik]	6330503K22Rik			6330503K22Rik	25.6813	282.348	543.114	110.656	630.331	397.671			26.364	136.837	47.8485	20.3842	89.8473	71.8272	1989.8	393.109	2382.91	2.08598	-0.449193	1.15723	-0.363262	0.581067	-0.604171	4.97947	2.78523	3.20989	2.95706	-1.76958	0.171835	0.419647	-0.212637	1	ENSMUST00000106557	307	307	>1|AGGATCCCGCGTTGCCGCCTGAGGGACCCGTAATATGGCGGNNNNNNNNNNNNNNNNNNNNNNNNNNNCCTAGATGCGCTCTGTCTAAACCGACTGAGGCCTTTGCTTACAGAGGAGGCTGGTCCACGGGCAGAGAAGCTGACCGGGCAGTAGGTGTCAGNNNNNNNNNNNNNNNNNNNNNNNNNNNNNNNNNNNNNNNNNNNNNNNNNNNNNNNNNNNNNNNNNNNNNNNNNNNNNNNNNNNNNNNNNNNNNNNNNNNNNNNNNNNNNNNNNNNNNNNNNNNNNNNNNNNNNNNNNNNNNNNTGTGCGGTGGGAAG|	-	-	125858887	-	-
chr7:125856030..125856086,+	125856069	p2@6330503K22Rik	[6330503K22Rik]	6330503K22Rik			6330503K22Rik	20.1782	197.369	471.297	52.5616	609.493	491.241			12.168	98.7609	57.4182	37.0622	151.617	109.536	1842.14	466.563	2308.7	1.35956	0.0597318	1.62424	1.56809	0.925893	0.615887	5.01618	3.62855	4.37531	2.80031	-0.640875	-0.828246	0.74309	0.823057	1	ENSMUST00000106557	350	350	>1|CCTGAGGGGTGGAGTTGAGCTGGTGGCGGCGGCAGCGGTTGCCAGGATCCCGCGTTGCCGCCTGAGGGACCCGTAATATGGCGGNNNNNNNNNNNNNNNNNNNNNNNNNNNCCTAGATGCGCTCTGTCTAAACCGACTGAGGCCTTTGCTTACAGAGGAGGCTGGTCCACGGGCAGAGAAGCTGACCGGGCAGTAGGTGTCAGNNNNNNNNNNNNNNNNNNNNNNNNNNNNNNNNNNNNNNNNNNNNNNNNNNNNNNNNNNNNNNNNNNNNNNNNNNNNNNNNNNNNNNNNNNNNNNNNNNNNNNNNNNNNNNNNNNNNNNNNNNNNNNNNNNNNNNNNNNNNNNNTGTGCGGTGGGAAG|	-	-	125858887	-	-
chr7:149558115..149558197,-	149558169	p1@6330512M04Rik	[6330512M04Rik]	6330512M04Rik			6330512M04Rik	0	8.22373	130.168	38.7296	13.8916	150.987			2.028	23.7978	25.5192	0	151.617	233.438	342	436.401	778.401	6.29387	0.213295			3.16848	2.64629	8.11781	4.30057	2.07576	9.5908	-6.04205	5.29023	0.555379	2.89466	4	ENSMUST00000084412	314	314	>1|CCCCGCCCCCAAGGTTGGGCCGCTGGGACGCGATCAGCGGACAGACAGCGGGAGAGCGGAAGGACGCGCGCTCCTAGGTTCAGGGGTCTGACCCACTCGTCGAGTCGCCAGTAGGCTCAGGGCCCCAGCCAGTGCCCAGCCCTGCTGGGAGCCCCGGCTAGCACCACGGACGGCACCCAGGAAGCCCGAGTCCCCTTGGACGGGGCCTTCTGGATTCCCAGGCCACCAGCAGGTTCACCCAAGGGCTGCTTCGCCTGTGTGTCCAAGCCTCCTGCCCTGCAGGCTGCAGCGGCTCCAGCTCCTGAGCCTTCGGCCTCACCCCCC|	-	-	149541869	ENSMUST00000059223	314	314
chr1:37486861..37486902,-	37486895	p1@6330578E17Rik	[6330578E17Rik]	6330578E17Rik			6330578E17Rik	737.421	3174.36	893.22	1311.27	5297.9	1650.23			875.082	2145.37	350.889	1510.28	2183.01	727.25	13064.4	7791.89	20856.3	0.829981	0.885208	0.738865	0.786984	1.05037	0.0250843	2.46281	1.51174	2.40521	0.946097	-0.0575995	-0.565646	0.781439	0.39085	1	ENSMUST00000027286	84	84	>1|GTAGCTTGCCAGTGGGCGTGTCCCACGCCCTTCCGGGCCGTGCGGGGTGACCGAGGGCCGTGATCCAGTGTGGTGAGGGCGGTGGGTCCCCGCC|	-	-	37477430	-	-
chr1:37486834..37486845,-	37486839	p2@6330578E17Rik	[6330578E17Rik]	6330578E17Rik			6330578E17Rik	18.3438	268.642	13.4656	69.16	387.228	72.3039			34.476	80.9125	0	51.8871	162.848	64.6445	829.143	394.768	1223.91	1.88624	2.38213	0.526679	0.582846	7.02557	1.00463	3.90664	1.21889	2.72333	2.1217	-1.18331	0.902819	0.814261	1.27207	1	-	-		-	-	-	-	ENSMUST00000027286	28	28
chr1:37486855..37486860,-	37486857	p3@6330578E17Rik	[6330578E17Rik]	6330578E17Rik			6330578E17Rik	49.5283	476.976	80.7938	80.2256	533.09	153.114			103.428	285.574	41.4687	72.2713	374.832	37.7093	1373.73	915.283	2289.01	0.690283	0.918093	0.160302	-0.514143	-0.135391	0.39178	3.48015	1.6561	3.08859	2.50484	-0.391558	0.848747	0.335501	0.171325	1	ENSMUST00000027286	46	46	>1|CGTGCGGGGTGACCGAGGGCCGTGATCCAGTGTGGTGAGGGCGGTGGGTCCCCGCC|	-	-	37477430	-	-
chr12:53107477..53107499,-	53107487	p1@6530401N04Rik	[6530401N04Rik]	6530401N04Rik			6530401N04Rik	25.6813	134.321	80.7938	16.5984	229.211	80.8102			9.126	149.926	28.7091	5.55933	68.7893	19.7525	567.416	281.862	849.278	-0.614677	0.000291073	0.768777		-0.528319	-1.11835	3.04185	4.21797	4.18276	3.87725	1.14091	-0.340716	0.439015	-0.992806	2	ENSMUST00000085404|ENSMUST00000021339	16|16	16	>1|GAGCATGCGCAGTGCGGACCCGCGCC|>2|GAGCATGCGCAGTGCGGACCCGCGCC|	-	|	53089793|53100534	-	-
chr3:105507575..105507598,+	105507585	p1@6530418L21Rik	[6530418L21Rik]	6530418L21Rik			6530418L21Rik	104.56	148.027	296.244	77.4592	965.465	550.785			153.114	214.18	70.1778	83.3899	91.2512	61.0531	2142.54	673.166	2815.71	-0.430418	0.893581	2.70125	-0.87274	-0.199425	-1.22639	2.08185	0.890933	4.28212	0.865115	2.20027	-0.0258179	1.53709	-0.890865	1	ENSMUST00000066610	101	101	>1|CGCCGCTCTAAGTCCCCACGCTGGAGCTGAGGCTCGGCTCAGCGCGGATAAGGGCGCGGAGCGCACTGAGAACCCTACTTTCTCGTGAGCCCGAGCCCAGCAAATGGGCGA|	-	-	105507686	-	-
chr6:113554743..113554762,+	113554751	p1@6720456B07Rik	[6720456B07Rik]	6720456B07Rik			6720456B07Rik	1219.86	1795.51	798.961	979.306	1290.18	665.621			605.358	1201.79	666.689	376.181	1061.32	378.889	6749.44	4290.23	11039.7	-0.316742	-0.263244	-0.476666	-0.685635	-0.81442	-0.179243	1.08841	1.6252	0.997561	1.93536	-0.0908489	0.310165	-0.377962	-0.44557	1	ENSMUST00000035725	21	21	>1|CTGCGCAGTCACTCTTCCTCAGGCGGCCGCC|	InrAC	-	113554772	-	-
chr14:99445653..99445682,+	99445664	p1@6720463M24Rik	[6720463M24Rik]	6720463M24Rik			6720463M24Rik	20.1782	134.321	139.145	27.664	69.4579	155.241			12.168	13.0888	41.4687	0	117.925	14.3654	546.006	199.016	745.022	0.445743	0.157383	-0.946484		-1.49735	3.12348	3.72781	2.11975	2.99927	8.053	-0.728541	5.93325	-0.218169	0.982066	1	ENSMUST00000022656	250	250	>1|GGGCATCTGCAGGGTGATGCTAGAACTTCCACGTTGCCCACGAGTGTAGGTACGTTCTCCGTGGCCCCAGGCCTGGACTCCTGCTTCGAGGTGGACCGCTCTGGTTTCCTGGCCCCAGACGTACCTGTGAGCTCGCCTAGGTGTGAAGGGGAGCAGAGAGAGAGGGCGCCTGGACACTGAATGGTCGCTGGAAGTGACGTCTCTGCTGTTTCCGAGGGAGCCCGCTCAACTTTGATCTTACAAAATTTGCTTCCTGGGCT|	-	-	99446534	-	-
chr14:99445625..99445648,+	99445639	p2@6720463M24Rik	[6720463M24Rik]	6720463M24Rik			6720463M24Rik	16.5094	98.6847	161.588	35.9632	78.1402	148.861			19.266	17.8483	41.4687	18.5311	211.983	82.6013	539.746	391.699	931.445	1.10011	-0.117971	-0.334851	-0.0546621	0.985557	3.53363	3.93838	1.59754	2.64136	3.9547	-1.29702	2.35716	-0.0737453	1.98756	1	ENSMUST00000022656	275	275	>1|GAGTTAAAGAGTCGGCGCCTGGCGTGGGCATCTGCAGGGTGATGCTAGAACTTCCACGTTGCCCACGAGTGTAGGTACGTTCTCCGTGGCCCCAGGCCTGGACTCCTGCTTCGAGGTGGACCGCTCTGGTTTCCTGGCCCCAGACGTACCTGTGAGCTCGCCTAGGTGTGAAGGGGAGCAGAGAGAGAGGGCGCCTGGACACTGAATGGTCGCTGGAAGTGACGTCTCTGCTGTTTCCGAGGGAGCCCGCTCAACTTTGATCTTACAAAATTTGCTTCCTGGGCT|	-	-	99446534	-	-
chr18:77953185..77953240,-	77953224	p3@8030462N17Rik	[8030462N17Rik]	8030462N17Rik			8030462N17Rik	5.50314	65.7898	130.168	41.496	39.9383	74.4304			33.462	59.4945	19.1394	3.70622	53.3468	48.4834	357.325	217.632	574.958	2.80646	-0.802279	-0.713065	-3.01333	1.31854	-0.155969	5.03236	1.22037	1.45166	4.60456	-3.58069	3.38419	-0.369159	-0.0865946	0	-	-		-	-	-	-	-	-
chr2:144096747..144096791,+	144096752	p1@8430406I07Rik	[8430406I07Rik]	8430406I07Rik			8430406I07Rik	67.8721	131.58	98.748	63.6272	36.4654	82.9368			60.84	35.6967	38.2788	44.4746	46.3275	55.6661	481.229	281.284	762.513	-0.0924705	-0.250354	-1.83716	-0.447717	0.534431	0.371498	1.75534	0.279938	0.90285	1.18835	-0.852487	0.908412	-0.702684	0.119177	3	ENSMUST00000110027	392	392	>1|CGATGAAAGTACGGGTCCCGAGAGGGTTGTTTGCGGGCTGGGTGTTACAGCGTGGTGGCATCTCAGGTACAGCTAGAACCCTGCCGCTGACCGACCTTCTATTTAAATACTCTCTTCCCTATCCAAACTCGGGCACGAAGGGCCACGCTTGTCCTGTCGCAGCCATGGGAGACACCTGCAGAGATCATTTTCTGGAATTAACGTTGGATGGGCTGTGCAGACCCACTTGCGACATGTCCCGAGTCTGGACCACGAGGTCACAGTAGCACCCACTTTTTAAAGGGCGGCGTGAGGAATAGATGAGCGATGCCCATACAGAATATTTAGTAAGAGTTTGATACGAACAGAACACACTTTTAAACTTTCCAGACTAGAGAAAAGTTAGAGGGGCGAAGT…	-	-	144097715	ENSMUST00000028910	121	121
chr2:144096614..144096685,+	144096643	p4@8430406I07Rik	[8430406I07Rik]	8430406I07Rik			8430406I07Rik	51.3626	120.615	71.8167	58.0944	362.918	216.912			109.512	185.623	6.3798	66.712	130.559	127.493	881.718	626.279	1508	0.176067	1.58803	1.58526	-0.710871	4.21756	-0.506035	1.89532	0.807217	3.30804	1.94367	1.41272	1.13645	1.3859	0.106995	3	ENSMUST00000028910|ENSMUST00000110027	230|501	365.5	>1|CGGCGCCCGCGCTTCTGCTTCGGGGGCGTGGAGGGGATGGCGCCTCACAGGTGCGACGGGAACGCCGTAGTGCATGCTGGGGCCGCCTCGCTTTGGGAAAGCGCGGGACCGATGAAAGTACGGGTCCCGAGAGGGTTGTTTGCGGGCTGGGTGTTACAGCGTGGTGGCATCTCAGATACGAACAGAACACACTTTTAAACTTTCCAGACTAGAGAAAAGTTAGAGGGGCGAAGTCTAAAA|>2|CGGCGCCCGCGCTTCTGCTTCGGGGGCGTGGAGGGGATGGCGCCTCACAGGTGCGACGGGAACGCCGTAGTGCATGCTGGGGCCGCCTCGCTTTGGGAAAGCGCGGGACCGATGAAAGTACGGGTCCCGAGAGGGTTGTTTGCGGGCTGGGT…	-	|	144097715|144097715	ENSMUST00000110028	172	172
chr6:87863930..87863970,+	87863960	p1@8430410A17Rik	[8430410A17Rik]	8430410A17Rik			8430410A17Rik	62.3689	408.445	2383.42	185.349	439.321	680.507			43.602	654.439	1352.52	135.277	110.905	483.038	4159.41	2779.78	6939.19	1.56371	-1.80759	0.105011	1.62232	-1.48448	-2.55554	5.473	5.50838	2.59172	2.1303	-2.88127	-3.37808	-1.12856	-1.49095	1	ENSMUST00000032141	67	67	>1|GGCGTCTCTTAGGCGGACGCTAGCTGCGAGGAAGGGTGGACTAGACCCTCGGGCGGTCTGAGCGGCAGCGCTGAAGT|	-	-	87864506	-	-
chr6:87863980..87863993,+	87863987	p2@8430410A17Rik	[8430410A17Rik]	8430410A17Rik			8430410A17Rik	16.5094	106.908	264.824	27.664	45.1476	87.1899			4.056	78.5327	188.204	0	37.9043	23.3438	548.244	332.041	880.285	0.727518	-1.59727	-1.23449		-2.98444	-1.04118	4.4518	5.87421	2.23774	6.94832	-2.21406	1.07412	-1.27623	-2.13538	1	ENSMUST00000032141	40	40	>1|GAGGAAGGGTGGACTAGACCCTCGGGCGGTCTGAGCGGCAGCGCTGAAGT|	-	-	87864506	-	-
chr9:4376533..4376600,+	4376577	p1@8430410K20Rik	[8430410K20Rik]	8430410K20Rik			8430410K20Rik	29.3501	572.92	1840.3	138.32	328.189	686.887			25.35	170.154	787.905	92.6555	94.0589	696.724	3595.97	1866.85	5462.82	2.21741	-1.42114	-0.802869	1.84948	-0.177315	-0.851791	6.33738	5.21263	2.87101	3.08648	-3.46637	-2.12615	-1.08218	-0.15458	0	-	-		-	-	-	-	-	-
chr11:3352461..3352513,+	3352485	p1@8430429K09Rik	[8430429K09Rik]	8430429K09Rik			8430429K09Rik	82.5471	164.475	89.7709	121.722	256.994	61.6709			53.742	215.37	25.5192	50.034	49.1352	26.9352	777.179	420.736	1197.92	0.557498	-0.53802	0.642297	-0.102157	0.0764515	-2.12073	1.61705	2.15388	1.3848	0.599534	-0.23225	-1.55435	0.386408	-1.22103	0	-	-		-	-	-	-	-	-
chr12:102017315..102017347,+	102017339	p1@9030617O03Rik	[9030617O03Rik]	9030617O03Rik			9030617O03Rik	20.1782	32.8949	233.404	11.0656	12.1551	59.5444			9.126	13.0888	98.8869	22.2373	0	32.3222	369.242	175.661	544.904	-0.838269	-1.96182	-1.3999	1.24005	-1.59838		3.68957	3.54653	2.64215	0.529612	-1.04742	-3.01692	-1.78515	-1.1431	4	ENSMUST00000069782|ENSMUST00000110073|ENSMUST00000110070|ENSMUST00000110069	211|287|211|268	244.25	>1|CATGTAGATCAGAGACTGAGCCGGGCAGAGCAAGCTGGTGGCAGTGGCGGTGGCGACAGGCAGCCCCAGAAGCCCCTGTGAGCTGAAGAAAGAGAGCTTTATGCCTTTCAGAAGGAAGCTCGCTCTGCAAGGCTGAGGAAACAAAAGGAAGAATTGTGTGTGGACTCTAGTCCAGACATCTCAAACCAACAGTTCCCTGCCGCTCATTCCGGGATGGTATA|>2|CATGTAGATCAGAGACTGAGCCGGGCAGAGCAAGCTGGTGGCAGTGGCGGTGGCGACAGGCAGCCCCAGAAGCCCCTGTGAGCTGAAGAAAGAGAGCTTTATGCCTTTCAGAAGGAAGCTCGCTCTGCAAGGCTGAGGAAACAAAAGGAAGAATTGTGTGTGGACTCTAGT…	-	|||	102067838|102024453|102067838|102067838	-	-
chr7:125884238..125884268,+	125884254	p1@9030624J02Rik	[9030624J02Rik]	9030624J02Rik			9030624J02Rik	20.1782	169.957	754.075	121.722	375.073	512.507			36.504	82.1024	258.382	48.1809	251.292	325.018	1953.51	1001.48	2954.99	2.56332	-0.556687	1.13968	0.395673	0.330444	1.60797	5.48254	3.20395	2.86119	3.56667	-2.62135	0.362717	0.096127	0.727403	4	ENSMUST00000175922|ENSMUST00000106552|ENSMUST00000106553	6|6|6	6	>1|GAAAACAGGCGATCAT|>2|GAAAACAGGCGATCAT|>3|GAAAACAGGCGATCAT|	-	||	125884260|125884260|125884260	-	-
chr17:41017474..41017528,-	41017506	p1@9130008F23Rik	[9130008F23Rik]	9130008F23Rik			9130008F23Rik	115.566	331.69	251.358	373.464	319.506	163.747			66.924	167.774	73.3677	150.102	294.811	258.578	1555.33	1011.56	2566.89	1.68795	-0.616746	-0.0539089	1.15941	1.81037	0.811421	2.32991	1.84154	0.371372	1.87886	-1.95854	0.0373196	0.294132	1.18998	1	ENSMUST00000068258	22	22	>1|TTTTCCTCCCAGAACTGAAGAAACGTGGACGC|	-	-	41016939	-	-
chr8:75094932..75094966,-	75094956	p1@9130011J15Rik	[9130011J15Rik]	9130011J15Rik			9130011J15Rik	157.757	1696.83	381.526	135.554	743.2	387.038			150.072	1142.29	229.673	85.2431	541.892	165.203	3501.9	2314.38	5816.28	-0.218091	0.0206671	-1.19047	-0.812362	-0.474121	-1.07516	3.71545	3.18825	3.05502	3.04483	-0.660433	-0.143416	-0.820705	-0.941383	2	ENSMUST00000167290|ENSMUST00000058733	29|153	91	>1|GCTTCCGTTTCCGGTTTGACGGACGCCTTGGGTGTAAGG|>2|GCTTCCGTTTCCGGTTTGACGGACGCCTTGGGTGTAAGGATGATCGGAGACATACTGCTGTTCGGGTAATATGAATGAGGGGTGTTAGAGGTCGGAGAGTGGCAGTCAGAGGGGTGGGGGTGACCCTTACTGACCGTTACTGTCCCTCCGCAGGACGCTACTG|	-	|	75091691|75091691	-	-
chr15:57865763..57865779,-	57865771	p4@9130401M01Rik	[9130401M01Rik]	9130401M01Rik			9130401M01Rik	27.5157	112.391	417.435	182.582	244.839	340.253			8.112	39.2664	194.584	48.1809	80.0203	206.503	1325.02	576.667	1901.68	2.70819	-0.294549	1.11985	2.49893	0.0855584	1.0178	4.24257	4.76617	1.6774	2.55974	-2.56517	-2.20643	0.461581	0.46728	4	ENSMUST00000100655	17	17	>1|TTCGAGGTCCAGTTGCACTTCCGCGCG|	-	-	57853920	ENSMUST00000185553	17	17
chr15:57865863..57865890,-	57865869	p2@9130401M01Rik	[9130401M01Rik]	9130401M01Rik			9130401M01Rik	201.782	890.904	426.412	138.32	713.68	576.304			117.624	506.893	277.521	92.6555	599.45	488.425	2947.4	2082.57	5029.97	-0.543151	0.434144	-0.319791	-0.342589	0.814418	0.241738	2.70371	2.73223	3.21663	3.54639	0.512916	0.814158	-0.0888804	0.387986	4	ENSMUST00000100655|ENSMUST00000185553	115|115	115	>1|GCCGCTCTACACTCTACCTTGCCTCGGCAGCCTTGGCGCGGCTGCTGTCGCGCGCTTTGGAGGCTGGGTGATGGGCGTCGCTCTAGGTGTCGCCTCGTTTCGAGGTCCAGTTGCACTTCCGCGCG|>2|GCCGCTCTACACTCTACCTTGCCTCGGCAGCCTTGGCGCGGCTGCTGTCGCGCGCTTTGGAGGCTGGGTGATGGGCGTCGCTCTAGGTGTCGCCTCGTTTCGAGGTCCAGTTGCACTTCCGCGCG|	-	|	57853920|57862510	-	-
chr15:57865891..57865904,-	57865898	p5@9130401M01Rik	[9130401M01Rik]	9130401M01Rik			9130401M01Rik	14.675	60.3073	26.9313	33.1968	105.923	42.5317			15.21	86.862	19.1394	5.55933	126.348	23.3438	283.565	276.462	560.028	1.15091	0.649578	0.807497		0.279866	0.538021	2.53151	2.76112	2.14419	4.6315	-0.387318	1.87039	0.830734	0.355777	4	ENSMUST00000100655|ENSMUST00000185553	144|144	144	>1|CACCGCTTCCGTGTGGGCGGCGCGCCGGTGCCGCTCTACACTCTACCTTGCCTCGGCAGCCTTGGCGCGGCTGCTGTCGCGCGCTTTGGAGGCTGGGTGATGGGCGTCGCTCTAGGTGTCGCCTCGTTTCGAGGTCCAGTTGCACTTCCGCGCG|>2|CACCGCTTCCGTGTGGGCGGCGCGCCGGTGCCGCTCTACACTCTACCTTGCCTCGGCAGCCTTGGCGCGGCTGCTGTCGCGCGCTTTGGAGGCTGGGTGATGGGCGTCGCTCTAGGTGTCGCCTCGTTTCGAGGTCCAGTTGCACTTCCGCGCG|	-	|	57853920|57862510	-	-
chr15:57865831..57865842,-	57865836	p7@9130401M01Rik	[9130401M01Rik]	9130401M01Rik			9130401M01Rik	11.0063	241.229	85.2823	38.7296	194.482	91.4431			9.126	98.7609	38.2788	14.8249	43.5198	19.7525	662.173	224.263	886.436	1.76952	0.100061	-0.31005		-0.93717	-1.17307	4.82885	3.83677	2.86814	2.05705	-1.9607	-1.77971	-0.0559725	-0.899982	4	ENSMUST00000100655|ENSMUST00000185553	82|82	82	>1|TGGCGCGGCTGCTGTCGCGCGCTTTGGAGGCTGGGTGATGGGCGTCGCTCTAGGTGTCGCCTCGTTTCGAGGTCCAGTTGCACTTCCGCGCG|>2|TGGCGCGGCTGCTGTCGCGCGCTTTGGAGGCTGGGTGATGGGCGTCGCTCTAGGTGTCGCCTCGTTTCGAGGTCCAGTTGCACTTCCGCGCG|	-	|	57853920|57862510	-	-
chr5:52581889..52581943,+	52581922	p1@9230114K14Rik	[9230114K14Rik]	9230114K14Rik			9230114K14Rik	3.66876	84.9785	58.3511	41.496	48.6205	36.1519			1.014	88.0519	22.3293	42.6215	19.6541	59.2574	273.267	232.928	506.195	3.33256	-0.68318	-0.799235	4.83197	1.38823	-2.13545	5.1086	6.19451	1.02183	0.88094	-4.08677	-5.31356	-0.218503	0.125124	0	-	-		-	-	-	-	-	-
chr2:158187241..158187290,-	158187257	p1@9430008C03Rik	[9430008C03Rik]	9430008C03Rik			9430008C03Rik	53.197	95.9435	62.8396	77.4592	105.923	140.355			77.064	55.9248	22.3293	24.0904	150.213	70.0315	535.717	399.654	935.371	0.537877	1.15303	0.142059	-1.65729	1.62738	1.41741	1.56868	0.0219683	1.66242	3.16621	0.0937428	3.14424	0.609721	0.651949	0	-	-		-	-	-	-	-	-
chr4:155484122..155484162,+	155484138	p1@9430015G10Rik	[9430015G10Rik]	9430015G10Rik			9430015G10Rik	163.26	142.545	31.4198	102.357	548.718	127.595			83.148	91.6215	0	124.158	110.905	34.1179	1115.89	443.951	1559.84	-0.670944	2.00469	1.94091	0.575577	6.11345	0.274207	0.0913511	0.139207	2.71812	0.223269	2.62677	0.084062	1.20609	0.621682	3	ENSMUST00000072554|ENSMUST00000169550|ENSMUST00000105576	129|279|89	165.667	>1|AGTGGTGAGTTCTATCTAGGAAGCTCAGACTACTATTGTTCCAGAATTGGAAATGCCCAGCTTGCCTGCTCCTTCAATGCTTCGGGGGCCGCTGCTAAGTAAAAAGTCTTCATAGAGATCTCCTTGTCAGCTCCCCAGC|>2|AGTGGTGAGTGAGGGCCCTGCTCTGGCGGAGGTGGCGGCTGCAGCGACGCCGTAAAGGCCGCGGGTAGCGCAGACTCTGGGACTCTGAGACTAATGCAGGGCCTAGCGGGGCAGCGCCTCCCTCGCTGCCTGCCATCTTGTCAGTGAGGAGGCGAATTCCTCTATCTAGGAAGCTCAGACTACTATTGTTCCAGAATTGGAAATGCCCAGCTTGCCTGCTCCTTCAATGCTTCGGGGGCCGCTGCTAAGTAAA…	-	||	155491140|155491140|155491140	-	-
chr1:57463572..57463618,+	57463602	p1@9430016H08Rik	[9430016H08Rik]	9430016H08Rik			9430016H08Rik	11.0063	60.3073	255.847	2.7664	34.729	127.595			2.028	16.6585	15.9495	0	1.40386	102.354	492.251	138.394	630.645		-1.00088	-0.787483		2.64448		4.78242	3.71111	5.63947	7.70401	0.857053	3.9929	-0.984583	1.56913	1	-	-		-	-	-	-	ENSMUST00000027114	14	14
chr18:4634910..4634972,+	4634950	p1@9430020K01Rik	[9430020K01Rik]	9430020K01Rik			9430020K01Rik	77.044	219.299	866.289	60.8608	159.753	561.418			20.28	76.153	181.824	74.1244	56.1546	263.965	1944.66	672.501	2617.17	-0.337697	-0.625321	-0.455834	1.84445	0.53657	-0.436149	3.80798	3.63677	3.55595	2.10314	-0.25203	-1.53363	-0.571793	0.501908	1	ENSMUST00000037029	135	135	>1|CGGTAGTAGCAGGCTGGGTGGCTCGTGCTGGTCCCCGCCGGGCGAAGCGGCAGCGGCTGTGGCGCGGGACAGTATGCGGGAACCGGTCGTGATGGGTCCTGCCACCGTGATGGTTGAAGCTTTTGAGGTTTGATGACGCTGCAGC|	-	-	4649128	-	-
chr15:101114711..101114739,+	101114731	p1@9430023L20Rik	[9430023L20Rik]	9430023L20Rik			9430023L20Rik	23.8469	142.545	471.297	13.832	116.342	472.102			57.798	222.509	185.014	18.5311	42.1159	158.02	1239.96	683.988	1923.95	-0.7645	0.00245807	-0.291906	-1.61509	-0.226866	-2.38764	4.65723	2.80713	5.36082	3.39815	0.703589	0.591014	-0.0823617	-1.08775	1	ENSMUST00000048393	311	311	>1|CCGCTCAGGCAGAGGAAGCGGAGGCCTGGACCGGCGTCTGTAGGGTCTGGACTCGGTCCTCGTCGTCTGCACTGCTGTCCCGAGACGGCGCGAGGTCGCGGGCAGCGATCCTGACGTCCGGTCCGGTCAGAATTCTCGGTGCGGGTCCAAATAGCCTGTTTTTGCTTTTGGTCTGTCCCCGAATACTGCGTGTTCGCGTTAGGGAAGAAGGGGACCCGAGGCTGAGTGGCTCCTGCTCGGATTTCTACCAGCAAGGTTGGCCCCTAGGTGGGGTGAAGTATCCTGTGTCTTGCCTTTGCTCCGGCTCCAGCTGCCTGCAGG|	-	-	101117429	-	-
chr7:144602400..144602444,-	144602438	p1@9430038I01Rik	[9430038I01Rik]	9430038I01Rik			9430038I01Rik	14.675	142.545	49.374	58.0944	85.0859	55.2912			19.266	102.331	3.1899	7.41244	50.5391	7.18272	405.065	189.921	594.986	1.94906	0.16175	-0.741019	-1.32083		-1.01059	3.66448	2.42325	1.2656	2.87937	-2.39887	0.456116	-0.057721	-0.932709	3	ENSMUST00000068996|ENSMUST00000117404|ENSMUST00000120340	48|48|48	48	>1|ACACGTGGTCGAGTGGTTCCCGCCTCCGAGTGGCCTGAGAGGCGGTACGTGAAGCCGC|>2|ACACGTGGTCGAGTGGTTCCCGCCTCCGAGTGGCCTGAGAGGCGGTACGTGAAGCCGC|>3|ACACGTGGTCGAGTGGTTCCCGCCTCCGAGTGGCCTGAGAGGCGGTACGTGAAGCCGC|	-	||	144568004|144568023|144579023	-	-
chr9:44187343..44187435,-	44187401	p1@9430081H08Rik	[9430081H08Rik]	9430081H08Rik			9430081H08Rik	89.8846	98.6847	13.4656	201.947	109.396	48.9114			104.442	21.418	6.3798	53.7402	39.3082	16.1611	562.29	241.449	803.739	1.1634	1.82296	0.147952	-0.952158		0.860948	0.317702	-1.89083	-0.350265	0.0452739	-0.667968	1.9361	0.832848	-0.274913	0	-	-		-	-	-	-	-	-
chr11:52209916..52209951,+	52209930	p1@9530068E07Rik	[9530068E07Rik]	9530068E07Rik			9530068E07Rik	27.5157	331.69	511.694	71.9264	227.475	318.988			19.266	234.408	188.204	7.41244	106.694	170.59	1489.29	726.574	2215.86	1.37028	-0.68093	-0.543136	-1.32083	-0.141374	-1.13188	4.91274	4.41995	2.91685	5.13369	-1.99588	0.713745	-0.493655	-0.633329	2	ENSMUST00000036952|ENSMUST00000109057	39|63	51	>1|TCACCTCGCAGAACCTAGCAACAGCGCAGGCTCGGGGGCCGAGTCCGTT|>2|TCACCTCGCAGAACCTAGCAACAGCGCAGGCTCGGGGGCCGAGTCCGTTATGGCCGCCTCCGCCCTGGGCAGA|	-	|	52209969|52209993	-	-
chr11:52209953..52209975,+	52209960	p2@9530068E07Rik	[9530068E07Rik]	9530068E07Rik			9530068E07Rik	1.83438	323.467	341.129	102.357	265.677	372.152			21.294	116.609	89.3172	16.678	160.041	141.859	1406.62	545.798	1952.41	5.46145	0.125398	-0.283461	-0.34337	0.664467	0.455083	8.15438	3.24362	2.63366	4.13782	-5.52072	0.894197	0.151325	0.486642	2	ENSMUST00000036952|ENSMUST00000109057	9|33	21	>1|CTCGGGGGCCGAGTCCGTT|>2|CTCGGGGGCCGAGTCCGTTATGGCCGCCTCCGCCCTGGGCAGA|	-	|	52209969|52209993	-	-
chr6:127059535..127059587,-	127059567	p1@9630033F20Rik	[9630033F20Rik]	9630033F20Rik			9630033F20Rik	25.6813	197.369	789.984	94.0576	241.366	633.722			15.21	96.3811	162.685	37.0622	51.943	172.385	1982.18	535.666	2517.85	1.85266	-0.317748	0.289661	1.2576	0.0833076	-0.885466	5.23769	4.04635	3.21099	2.58147	-2.0267	-1.46488	-0.0638653	-0.0692925	1	ENSMUST00000039913	83	83	>1|AGACGGAAGTAGTGCAGGCAAAGTGGTCCCAGAGTCAGGCGCAGCGAGGTGCTGCTGCAGAGCCGGGTCGTGGCTCACGCGTCTTGTGCCAAA|	-	-	127037891	-	-
chr7:49897945..49897979,-	49897962	p1@9830147E19Rik	[9830147E19Rik]	9830147E19Rik			9830147E19Rik	51.3626	307.019	309.71	60.8608	90.2953	116.962			13.182	201.091	47.8485	81.5368	94.0589	68.2358	936.209	505.953	1442.16	0.242622	-1.40105	-1.75999	2.58399	0.507591	-1.09215	3.57304	4.18834	1.75951	0.98871	-1.81353	-3.19963	-1.31557	-0.104147	1	ENSMUST00000098503	111	111	>1|CCGGTGCTATGCTGCCGGTTCCAAACTATATCTGAGGAGTGTGGTGTGGTTTGTGTGTCCTGCTCTGTGTGCTACTGCTGGGTGCTGTGAGGGGAATTCAGACGAGCTCAGACCTCGCGAC|	-	-	49867873	-	-
chr4:124614286..124614318,+	124614299	p1@9930104L06Rik	[9930104L06Rik]	9930104L06Rik			9930104L06Rik	58.7002	158.992	219.939	13.832	95.5046	370.026			59.826	83.2923	153.115	31.5029	207.772	89.784	916.993	625.292	1542.29	-2.04636	0.749196	-0.732308	-0.914579	-0.766779	1.31358	2.68016	1.97347	5.02311	3.21931	2.34295	1.24584	0.131259	0.151368	0	-	-		-	-	-	-	-	-
chr11:69154265..69154340,+	69154297	p1@A030009H04Rik	[A030009H04Rik]	A030009H04Rik			A030009H04Rik	20.1782	74.0135	17.9542	27.664	428.903	42.5317			19.266	42.836	3.1899	14.8249	23.8657	3.59136	611.244	107.574	718.818	0.445743	1.22145	2.52676	-0.367145		-0.830716	2.16084	1.23501	4.06666	0.867336	1.90582	-0.367678	2.14897	-0.620909	0	-	-		-	-	-	-	-	-
chr10:83006686..83006752,+	83006728	p1@A230046K03Rik	[A230046K03Rik]	A230046K03Rik			A230046K03Rik	47.6939	402.963	1288.21	52.5616	536.562	510.38			24.336	86.862	133.976	25.9435	113.713	154.428	2838.37	539.259	3377.63	0.138818	-1.33487	0.412655	0.0904823	0.204256	0.386649	5.13346	3.15574	4.30306	3.34469	-0.830399	0.18895	-0.661055	0.26194	1	ENSMUST00000038388	58	58	>1|CGGCTGGGGTGAGGCCCGCGTCGCGGCTGTGGCTGCTCGGGGCTGTGTCTGTGGGAGGTTCCGCGGCG|	-	-	83006786	-	-
chr14:123312330..123312412,-	123312374	p1@A2ld1	[A2ld1]	A2ld1			A2ld1	51.3626	408.445	318.687	96.824	220.529	250.937			39.546	138.027	98.8869	14.8249	137.579	46.6877	1346.78	475.551	1822.34	0.9081	-0.344204	-0.887672	-1.38578	-1.07465	-0.00467915	3.81044	2.56768	2.27781	3.59175	-1.53263	1.02408	-0.453717	-0.47263	4	ENSMUST00000110679|ENSMUST00000038075|ENSMUST00000162164	125|125|361	203.667	>1|CCAGCTGGGCATTTCCGCTCCGTGGTCCGGGCGCGCTCCTCGTGATTCCCCCGACCGCTGCAGGGACAAGTTGCTTCCTGAAGGATCCATGTGTATTGTTCAAAACACAAGCTTAAAAAGAGTGCCTGCAGACAG|>2|CCAGCTGGGCATTTCCGCTCCGTGGTCCGGGCGCGCTCCTCGTGATTCCCCCGACCGCTGCAGGGACAAGTTGCTTCCTGAAGGATCCATGTGTATTGTTCAAAACACAAGCTTAAAAAGAGTGCCTGCAGACAG|>3|CCAGCTGGGCATTTCCGCTCCGTGGTCCGGGCGCGCTCCTCGTGATTCCCCCGACCGCTGCAGGTGAGGCGCCGAGGCGGGCTGGGACTGGGAGCCTGGGGGCGGCTTAGGGACTCTG…	-	||	123215798|123290573|123290707	-	-
chr2:91077267..91077302,+	91077294	p1@A330069E16Rik	[A330069E16Rik]	A330069E16Rik			A330069E16Rik	20.1782	76.7548	31.4198	118.955	32.9925	2.12658			26.364	97.571	38.2788	68.5651	87.0396	32.3222	282.427	350.141	632.568	2.53029	-3.60319	-1.20579	1.36228	-0.240594	-0.163891	2.39383	2.34357	-1.74575	0.795344	-4.13958	-1.54822	0.262577	0.211668	0	-	-		-	-	-	-	-	-
chr4:153331356..153331384,+	153331363	p1@A430005L14Rik	[A430005L14Rik]	A430005L14Rik			A430005L14Rik	1.83438	200.111	35.9083	60.8608	123.288	97.8229			1.014	179.673	0	3.70622	44.9237	111.332	519.825	340.649	860.474	4.71621	1.43326	-0.696529		7.80519	-1.98787	6.66277	6.89488	1.85264	5.21985	-4.81013	-1.67503	0.245003	-0.175251	3	ENSMUST00000105645|ENSMUST00000058393|ENSMUST00000141493	53|53|53	53	>1|GCGCGCGCTCAGAGCCGCGCGATTGAGACTTGGCGGAGGAGCGTTAGGCCGGGGCGCTCACTC|>2|GCGCGCGCTCAGAGCCGCGCGATTGAGACTTGGCGGAGGAGCGTTAGGCCGGGGCGCTCACTC|>3|GCGCGCGCTCAGAGCCGCGCGATTGAGACTTGGCGGAGGAGCGTTAGGCCGGGGCGCTCACTC|	-	||	153331416|153331416|153331416	-	-
chr19:56896651..56896710,-	56896664	p1@A630007B06Rik	[A630007B06Rik]	A630007B06Rik			A630007B06Rik	7.33752	246.712	350.106	44.2624	182.327	418.937			14.196	157.065	108.457	14.8249	105.29	355.545	1249.68	755.377	2005.06	2.51382	0.258602	-0.435268	0.0604521	1.7083	-0.574751	6.25196	4.17805	3.74884	4.91187	-2.50312	0.733815	0.0954794	0.764894	1	ENSMUST00000118592	194	194	>1|CGCCATCTTTGTTGATGTGTCAGCTCCGCAGGGGTTTTGGGGGAAAACCTCCGCTGAGAGCCCGGGATCTGCAGTGGTCTCCGCGCGTGACTTCCTCACCCACTCCGCGTCGGCTACACGCCGCCATGGGTTCGTCGGCCCTGGAGCCGGAGCTCCATCGGCCTCGCTAGGGTGCGGCCCGGGGCTGGACGACGGACGATGTAA|	-	-	56865452	-	-
chr16:98303146..98303177,-	98303152	p1@A630089N07Rik	[A630089N07Rik]	A630089N07Rik			A630089N07Rik	18.3438	98.6847	179.542	44.2624	104.187	85.0634			5.07	107.09	38.2788	22.2373	81.4241	26.9352	530.083	281.036	811.118	1.2482	-1.07327	0.0778911	2.02931	-0.49924	-0.393185	3.88669	4.71085	2.08374	2.25933	-1.80295	-2.45152	-0.344218	-0.203334	0	-	-		-	-	-	-	-	-
chr16:98303597..98303604,-	98303598	p2@A630089N07Rik	[A630089N07Rik]	A630089N07Rik			A630089N07Rik	7.33752	142.545	103.237	33.1968	90.2953	34.0253			53.742	76.153	66.9879	16.678	47.7314	28.7309	410.636	290.023	700.659	2.10414	-1.5872	-0.655775	-1.65885	-1.20714	-0.66837	4.97376	1.40498	1.88917	2.16359	-3.08459	0.758606	-0.682577	-1.0758	0	-	-		-	-	-	-	-	-
chr1:90174045..90174084,-	90174060	p2@A730008H23Rik,p2@Hjurp	[A730008H23Rik, Hjurp]	A730008H23Rik, Hjurp	A730008H23Rik		A730008H23Rik	638.364	2881.05	4367.35	675.002	3889.64	3100.56			689.52	1625.39	1795.91	852.431	1006.57	1479.64	15552	7449.47	23001.4	0.0804499	-0.494163	0.432981	0.30579	-0.279386	-0.691065	3.50418	2.31005	3.37141	1.54374	-0.132774	-0.766308	-0.0411063	-0.300126	3	ENSMUST00000065420|ENSMUST00000147393	17|17	17	>1|AGTGCCGGGCAGAGAGCCACGTACGCC|>2|AGTGCCGGGCAGAGAGCCACGTACGCC|	-	|	90161755|90164564	ENSMUST00000054674	17	17
chr1:90174085..90174211,-	90174131	p1@A730008H23Rik,p1@Hjurp	[A730008H23Rik, Hjurp]	A730008H23Rik, Hjurp	A730008H23Rik		A730008H23Rik	1377.62	6831.18	12608.3	1197.85	9248.32	6896.51			1209.7	3754.1	3394.05	1610.35	2175.99	3302.26	38159.8	15446.5	53606.3	-0.20165	-0.87039	0.43703	0.412577	-0.0395516	-0.786657	3.81826	2.56242	3.75199	1.76602	-0.0662604	-0.796403	-0.263436	-0.237618	3	ENSMUST00000054674|ENSMUST00000065420|ENSMUST00000147393	88|88|88	88	>1|AAATACTTTTGAAAGACCCTATTAGCGCGCGGGGCGCCACGTTTGATCTGTGGACGGGCTTGGGCGGGTGCAGTGCCGGGCAGAGAGCCACGTACGCC|>2|AAATACTTTTGAAAGACCCTATTAGCGCGCGGGGCGCCACGTTTGATCTGTGGACGGGCTTGGGCGGGTGCAGTGCCGGGCAGAGAGCCACGTACGCC|>3|AAATACTTTTGAAAGACCCTATTAGCGCGCGGGGCGCCACGTTTGATCTGTGGACGGGCTTGGGCGGGTGCAGTGCCGGGCAGAGAGCCACGTACGCC|	-	||	90161755|90161755|90164564	-	-
chr11:119352673..119352719,+	119352688	p1@A730011L01Rik	[A730011L01Rik]	A730011L01Rik			A730011L01Rik	12.8407	16.4475	94.2594	44.2624	60.7757	150.987			17.238	23.7978	35.0889	3.70622	21.058	26.9352	379.573	127.824	507.397	1.74646	0.676857	1.85425		-0.375399	-0.172605	3.05934	1.7433	2.24549	3.52719	-0.813849	1.78389	1.04821	-0.553777	3	ENSMUST00000106244|ENSMUST00000129327|ENSMUST00000140323	29|106|51	62	>1|CTCCGGAAGTGACGTCCTCAAAGCCTCGAGGCGCTAGCC|>2|CTCCGGAAGTGACGTCCTCAAAGCCTCGAGGCGCTAGCCATGGCTCACACGGCCGCTGAGCGGCCGCCAGAGGAAACCCTGTCGCTGTGGAAAGGGTGGTGTATGAGGACAGCCGC|>3|CTCCGGAAGTGACGTCCTCAAAGCCTCGAGGCGCTAGCCATGGCTCACACGGCCGCTGAGC|	-	||	119352717|119360861|119352739	-	-
chr8:37676944..37676975,-	37676960	p1@A730069N07Rik,p1@Dlc1	[A730069N07Rik, Dlc1]	A730069N07Rik, Dlc1	A730069N07Rik		A730069N07Rik	60.5345	304.278	834.869	190.882	395.91	816.608			28.392	97.571	92.5071	48.1809	95.4627	359.136	2603.08	721.25	3324.33	1.64875	-0.0318867	0.379236	0.752684	1.95112	-0.0313518	4.22282	2.72164	2.66408	3.22475	-1.55874	0.503113	0.226187	1.20063	3	ENSMUST00000033923	312	312	>1|CGCAGAGAGCAGAGCACTTCAGCGTTTGGGTGGAGGGCGGTGCGCTCCAGCCTGAGCCATGGCTGTGCGTCCTCGCTGTTGGAGCCACGGCTCCCCAGCTCCGTGCCCCGCTCCCTGAGAGCGCTCCCTTCGCGGTGGCAATCTAAAACCCACGATTTTGCCCGAGCTGGGGCGAAGCGTAAGGAAGCTGCGAACCAGGATGTGCTGACGACCGCGAGAGGCTCGCGTCCCGGCTGCCACCGTGGGTCCCGACGTGGGATCCCGATTACTTCTGGCAGCCTCGACGTTCCCAGTGCGCTCCCGCCGCCCTGCGCCGACCTTA|	-	-	37633336	-	-
chrX:155970606..155970680,+	155970617	p1@A830080D01Rik	[A830080D01Rik]	A830080D01Rik			A830080D01Rik	7.33752	79.496	350.106	8.2992	95.5046	272.203			5.07	64.2541	66.9879	9.26555	37.9043	98.7624	812.947	282.244	1095.19		-0.362523	0.263176		0.556619	-0.753702	5.77814	4.56389	5.387	3.81209	-0.391137	-0.751808	-0.21641	0.0980393	3	ENSMUST00000112464|ENSMUST00000057180	186|186	186	>1|GCCCGCGGGGAGAGCTGGGTGCTGGTTGGAGCAGGAGGCGGGAGCTGCGCGACGGGCGAGGCGGTGAGGGAGCAGCAACANNNNNNNNNNNNNNNNNNNNNNNNNNNNNNNNNNNNNNNNNNNNNNNNNNNNNNNGCTCTGGTGACGACTTCTCTGAGGGTGTAAAAAGTGGATCAGGCAGCTCATATGCTAAAGG|>2|GCCCGCGGGGAGAGCTGGGTGCTGGTTGGAGCAGGAGGCGGGAGCTGCGCGACGGGCGAGGCGGTGAGGGAGCAGCAACANNNNNNNNNNNNNNNNNNNNNNNNNNNNNNNNNNNNNNNNNNNNNNNNNNNNNNNGCTCTGGTGACGACTTCTCTGAGGGTGTAAAAAGTGGATCAGGCAGCTCATATGCTAAAGG|	-	|	155986206|155986206	-	-
chr17:26852589..26852647,+	26852622	p1@A930001N09Rik	[A930001N09Rik]	A930001N09Rik			A930001N09Rik	16.5094	95.9435	148.122	58.0944	121.551	106.329			1.014	72.5833	47.8485	40.7684	84.2318	96.9667	546.55	343.413	889.963	1.78443	-0.476341	0.339733	4.7686	1.01144	0.213363	3.84581	6.31968	1.96261	2.13844	-1.88321	-4.18125	0.133946	0.867351	4	ENSMUST00000062519|ENSMUST00000144221|ENSMUST00000142539|ENSMUST00000151681	283|256|112|132	195.75	>1|GAACCCGTCAGGAAGGACATAAACAAAACAAACCGAGGCAGCATGGAGACGGCCCGCGGCCGCGTAAGCGCGGCCGGATCCAGTGCCTGAACCGCCTTCAGCCTCAGAACCGCAAATTTATTTTTTTTAAAAAGTGGTGACCCAAGCAGTTGAACTGAAGGTATTCTGGGAAAATCTGCTGTTTATTGTGAAAATCATCTTTGATCTTGGAATTAAAAGTAAAGCTGGAAAGGAATTTACAAACAAGAAAAAGAAGAAGTTTGGAATTGGACTCACAGGATCTGGGCTTGGAA|>2|GAACCCGTCAGGAAGGACATAAACAAAACAAACCGAGGCAGCATGGAGACGGCCCGCGGCCGCGTAAGCGCGGCCGGATCCAGTGCCTGAACCGCCTTC…	-	|||	26873919|26873919|26876502|26894784	-	-
chr17:36131438..36131484,+	36131448	p1@A930015D03Rik	[A930015D03Rik]	A930015D03Rik			A930015D03Rik	22.0126	197.369	291.755	71.9264	102.45	102.076			17.238	86.862	47.8485	29.6498	61.77	48.4834	787.59	291.852	1079.44	1.68579	-1.51054	-0.942599	0.765303	0.0188206	-0.488468	4.44287	2.93029	1.50122	1.87713	-2.94165	-1.05316	-0.885481	-0.118747	0	-	-		-	-	-	-	-	-
chr11:83105221..83105250,+	83105243	p1@AA465934	[AA465934]	AA465934			AA465934	786.949	578.402	67.3282	107.89	508.779	53.1646			529.308	323.65	15.9495	61.1526	175.483	53.8704	2102.51	1159.41	3261.93	-2.86096	-0.337914	-0.184862	-3.10324	1.72478	-0.881226	-0.285138	-0.639513	2.37548	1.89848	2.66062	2.53799	-1.09627	-1.57898	0	-	-		-	-	-	-	-	-
chr11:83105185..83105211,+	83105203	p2@AA465934	[AA465934]	AA465934			AA465934	517.295	482.459	130.168	113.422	680.688	114.836			271.752	358.157	3.1899	87.0962	209.176	21.5482	2038.87	950.919	2989.79	-2.18433	-0.180066	0.496153	-1.636		-0.774444	0.243803	0.410436	2.80476	1.40035	2.56096	0.989915	-0.313802	-0.993092	0	-	-		-	-	-	-	-	-
chr8:97856179..97856242,+	97856202	p1@AA960436	[AA960436]	AA960436			AA960436	14.675	164.475	26.9313	13.832	85.0859	63.7975			11.154	70.2035	9.5697	24.0904	103.886	43.0963	368.796	262	630.796	-0.0824603	1.22894	-0.946797	1.07727	2.11419	0.562074	3.66063	2.78409	3.38171	2.58437	-0.278917	-0.199721	-0.339928	0.908124	1	ENSMUST00000034245	59	59	>1|CTTCCGGCTCAGAGGAACTCCGGGCGTCGGATCAGGTTGTCGGTGGACACGGCTTGTGGTCGAGGCCCC|	-	-	97856261	-	-
chr15:102181065..102181121,-	102181103	p1@Aaas	[Aaas]	Aaas			Aaas	22.0126	101.426	439.877	66.3936	97.2411	472.102			44.616	45.2158	440.206	25.9435	98.2705	303.47	1199.05	957.722	2156.77	1.57114	0.101885	-0.0604843	-0.770724	-0.535888	1.11139	4.58897	3.42901	3.09062	3.92707	-1.49834	0.498057	0.174339	-0.309225	1	ENSMUST00000041208	55	55	>1|TCCGGGGAGCGCAGTCGTCACCAGCCGGGAGCCTGTCGATTCCAGACGCTCTCCGGACTGGCAAG|	-	-	102168711	-	-
chr15:102181123..102181202,-	102181140	p2@Aaas	[Aaas]	Aaas			Aaas	38.522	57.5661	484.763	77.4592	98.9775	929.317			66.924	57.1147	491.245	11.1187	117.925	351.953	1686.6	1096.28	2782.88	0.998432	0.938181	0.776675	-2.53682	-0.480477	1.03946	3.79814	3.0251	3.72209	5.3393	-0.0760464	2.3142	0.928202	-0.354897	1	ENSMUST00000041208	92	92	>1|ACCCGTCCTCACACGAATCTAGCCCGGGAACTAAGATTCCGGGGAGCGCAGTCGTCACCAGCCGGGAGCCTGTCGATTCCAGACGCTCTCCGGACTGGCAAG|	-	-	102168711	-	-
chr5:125956234..125956259,+	125956242	p1@Aacs	[Aacs]	Aacs			Aacs	7.33752	68.531	444.366	11.0656	48.6205	142.481			15.21	11.8989	121.216	0	16.8464	39.505	722.402	204.676	927.078		-1.63755	-0.490919		-1.60527	0.484422	6.03353	3.08833	4.0502	6.82912	-1.98334	3.74079	-1.36143	-1.38835	1	ENSMUST00000031445	104	104	>1|GCGCTGGTTCAGTCTCGCGCTGTGGTTCGTCGGCGCACCGCTGATCCGCTCCACGCCTTGCGCTCTCCGCTCTCAGCCAAAGCCCGGCAGCCCCGGCCACGCAGCTCCGCAACC|	Inr	-	125956346	-	-
chr1:74331210..74331286,-	74331247	p1@Aamp	[Aamp]	Aamp			Aamp	100.891	2612.4	8276.88	470.288	3688.22	7043.25			103.428	1658.71	8188.47	222.373	1002.36	6845.13	22191.9	18020.5	40212.4	2.21515	-0.23283	0.497465	1.10064	-0.258499	-0.726375	6.7469	6.56613	4.51069	5.13803	-2.23621	-1.4281	0.0275093	-0.302223	2	ENSMUST00000006462|ENSMUST00000178235	51|51	51	>1|GCGCAGAGCTGACTCTGGGAGGCGTTTGGGCCCAGAGAAGTGGATCGGTAGCTTTCGCCGC|>2|GCGCAGAGCTGACTCTGGGAGGCGTTTGGGCCCAGAGAAGTGGATCGGTAGCTTTCGCCGC|	-	|	74326807|74326807	-	-
chr8:113557790..113557832,+	113557814	p1@Aars	[Aars]	Aars			Aars	214.622	526.318	2585.4	461.989	475.787	3325.98			162.24	345.068	1856.52	179.752	530.661	1599.95	7590.1	4674.19	12264.3	1.10426	0.363328	-0.145475	0.147444	-0.214512	0.620178	3.85471	3.75823	3.03937	3.56352	-0.815345	-0.194711	0.35814	-0.0329995	2	ENSMUST00000034441	370	370	>1|GCGGGTGAGTATAGCTTCTTGTGCGCATCTGAGGGAGCAGGTAACTGCCGGCGAGTGGCGGTGGGCTCCGGGCAAGGAAGGACCTGGGGACCCGGACCCTCGGGAAAAAAAGCAAGTGAGCCCCGAGAGCTCTACGAGAAGAGCCGGCGCTTGGAGGGGGAGGGGCAGCTGCAGCGGGCTGCCGGGCGGTCCCGCCCCTGGCCTGGGTCAGGACCCGGTCTCCGCAGGAGCCGGATCTCGAGAGTAGCTTTTGCTATTCCCTCGGAGCACTGAGAGTGGTGTGGTTTCTGGTGGACTTGCAGAGGACCAAGACCTTGGGAAGATCGCGGTTGCTCTTCAGTCGCCACCCAGAGCTAAGGTTCCCGAGGAGACTTTCCGAA|	-	-	113560829	-	-
chr8:113557761..113557786,+	113557778	p2@Aars	[Aars]	Aars			Aars	58.7002	46.6011	480.274	171.517	164.963	1512			55.77	253.447	1476.92	113.04	473.102	1547.88	2434.06	3920.16	6354.21	1.53888	1.6535	1.81267	1.01276	0.0676724	0.899151	3.15516	4.94299	3.28566	4.15414	0.130503	-0.788846	1.65757	0.256661	2	ENSMUST00000034441	406	406	>1|ATTGGATGGTGAGGTACGGCTCTGGCACCGGTTGTGGCGGGTGAGTATAGCTTCTTGTGCGCATCTGAGGGAGCAGGTAACTGCCGGCGAGTGGCGGTGGGCTCCGGGCAAGGAAGGACCTGGGGACCCGGACCCTCGGGAAAAAAAGCAAGTGAGCCCCGAGAGCTCTACGAGAAGAGCCGGCGCTTGGAGGGGGAGGGGCAGCTGCAGCGGGCTGCCGGGCGGTCCCGCCCCTGGCCTGGGTCAGGACCCGGTCTCCGCAGGAGCCGGATCTCGAGAGTAGCTTTTGCTATTCCCTCGGAGCACTGAGAGTGGTGTGGTTTCTGGTGGACTTGCAGAGGACCAAGACCTTGGGAAGATCGCGGTTGCTCTTCAGTCGCCACCCAGAGCTAAGGT…	-	-	113560829	ENSMUST00000125268	51	51
chr8:113557998..113558065,+	113558013	p3@Aars	[Aars]	Aars			Aars	176.1	257.677	798.961	102.357	286.514	1816.1			53.742	364.106	2162.75	72.2713	373.428	1215.68	3437.71	4241.98	7679.69	-0.779852	1.18414	0.152762	0.423959	-0.830851	0.0364201	2.5816	5.54208	4.35382	4.44915	1.77222	-1.09292	0.838637	-0.635175	2	-	-		-	-	-	-	ENSMUST00000034441	171	171
chr8:113557837..113557849,+	113557842	p4@Aars	[Aars]	Aars			Aars	3.66876	35.6361	287.267	44.2624	60.7757	559.292			1.014	15.4686	111.647	7.41244	14.0386	125.698	990.901	275.278	1266.18	3.4246	0.95999	0.761872		0.1703	-0.135343	6.27757	6.39729	3.79323	4.14759	-2.48434	-2.2497	1.02338	0.198952	2	ENSMUST00000034441	342	342	>1|CTGAGGGAGCAGGTAACTGCCGGCGAGTGGCGGTGGGCTCCGGGCAAGGAAGGACCTGGGGACCCGGACCCTCGGGAAAAAAAGCAAGTGAGCCCCGAGAGCTCTACGAGAAGAGCCGGCGCTTGGAGGGGGAGGGGCAGCTGCAGCGGGCTGCCGGGCGGTCCCGCCCCTGGCCTGGGTCAGGACCCGGTCTCCGCAGGAGCCGGATCTCGAGAGTAGCTTTTGCTATTCCCTCGGAGCACTGAGAGTGGTGTGGTTTCTGGTGGACTTGCAGAGGACCAAGACCTTGGGAAGATCGCGGTTGCTCTTCAGTCGCCACCCAGAGCTAAGGTTCCCGAGGAGACTTTCCGAA|	-	-	113560829	-	-
chr11:101278729..101278741,-	101278737	p9@Aarsd1	[Aarsd1]	Aarsd1			Aarsd1	42.1907	109.65	798.961	113.422	448.004	565.671			20.28	282.004	701.778	94.5086	300.427	350.158	2077.9	1749.16	3827.05	1.41606	-0.497788	2.02565	2.19286	-1.00198	0.0911422	4.41246	5.5658	3.15418	2.77671	-1.25828	-2.78909	0.245278	-0.430106	3	-	-		-	-	-	-	ENSMUST00000070395	36	36
chr9:4309432..4309504,-	4309468	p1@Aasdhppt	[Aasdhppt]	Aasdhppt			Aasdhppt	152.254	2308.13	2316.09	271.107	1017.56	761.317			93.288	624.692	440.206	127.865	457.66	430.963	6826.45	2174.67	9001.12	0.830316	-1.60449	-1.18121	0.452772	-0.0305796	-0.448449	4.92009	3.50585	2.71178	2.79214	-2.20831	-0.71371	-1.22013	-0.188188	1	ENSMUST00000051589	33	33	>1|TCTGCTCTACCTGGCTTGAGGATCAGCGGACCGAGCCGGTCGT|	-	-	4296674	-	-
chr11:84326987..84327055,-	84326994	p1@Aatf	[Aatf]	Aatf			Aatf	99.0565	1011.52	7029.06	854.818	2340.73	3251.55			57.798	178.483	842.134	185.311	171.271	1073.82	14586.7	2508.81	17095.5	3.10287	-1.11209	1.21003	1.67232	0.350442	-0.0593367	6.33573	4.13056	2.70903	2.74492	-3.6267	-1.38564	-0.336291	0.407341	1	ENSMUST00000018841	111	111	>1|TCTCCGCCTTGAGTTGCCAAGTAGAGTCTGGGCCGTAGCGCCACTGCTGCGAGTGTCGGGCCGGGGGGCTCGGGCTGCAGTGCAGGTTCACGAGCGCAGCGCCGGCAGTGACCTGGTGACC|	-	-	84236457	-	-
chr10:79459224..79459250,+	79459242	p1@Abca7	[Abca7]	Abca7			Abca7	95.3878	76.7548	264.824	110.656	60.7757	297.722			79.092	63.0642	370.028	5.55933	103.886	260.374	906.12	882.003	1788.12	0.213167	0.16863	-0.33431	-3.71539	-0.506233	0.715642	1.83491	2.44564	1.69139	5.91164	-0.143523	3.466	0.102424	-0.469303	1	ENSMUST00000132517	98	98	>1|GGCGTCGTCCGCAATTGAGCGGGGCTCCACTTAAAGGGGCCGCGCTCCCCCGCCGAGGCCGAGAGGAGCGAAAGTGGATGGAGTTTGGGGGCCTCAGAACGAGTCATC|	-	-	79460359	-	-
chr10:79459287..79459296,+	79459292	p5@Abca7	[Abca7]	Abca7			Abca7	22.0126	10.965	40.3969	11.0656	12.1551	48.9114			9.126	19.0382	226.483	1.85311	53.3468	64.6445	145.507	374.492	519.998	-0.96089	0.272854			-1.80087	1.46256	1.20394	4.6757	2.41231	5.65407	1.20836	0.978367	-0.0244663	-1.08416	1	ENSMUST00000132517	48	48	>1|CGCCGAGGCCGAGAGGAGCGAAAGTGGATGGAGTTTGGGGGCCTCAGAACGAGTCATC|	-	-	79460359	-	-
chr5:8798139..8798164,+	8798146	p1@Abcb1b	[Abcb1b]	Abcb1b			Abcb1b	31.1845	309.76	403.969	218.546	441.058	418.937			8.112	199.902	350.889	101.921	124.944	265.761	1823.45	1051.53	2874.98	2.78938	0.0524254	0.509123	3.57202	-0.40023	-0.675851	4.49454	6.00032	1.97394	1.93341	-2.5206	-4.06691	0.533636	-0.181932	1	ENSMUST00000009058	149	149	>1|GAAGCCCTCTGGCTCCTTCCCGCAGTGGCTCTTGAAGCCGTAAGAGGCTGAGGCCGCTGCTTCCATCTTCTGAGGTTCCGCTCAACTCAGAGCTACTTCCAAATTCTACATCTTGGCTGACTTTGCGAAGGAAACCCGGAGGTGGCACGTGAGGTGGTG|	-	-	8798741	-	-
chrX:101609164..101609195,-	101609172	p1@Abcb7	[Abcb7]	Abcb7			Abcb7	22.0126	189.146	520.671	71.9264	194.482	321.114			13.182	52.3552	57.4182	14.8249	26.6734	188.546	1319.35	353	1672.35	1.68579	-0.696426	0.0400357	0.163596	1.70665	-0.959848	4.97966	3.01073	2.83305	3.81521	-2.14661	0.804478	-0.316621	0.901057	1	ENSMUST00000033695	10	10	>1|TTCCTTTTTCCTCGCTCAAG|	-	-	101479381	-	-
chr16:14361645..14361694,+	14361674	p1@Abcc1	[Abcc1]	Abcc1			Abcc1	12.8407	54.8248	130.168	33.1968	114.606	384.912			5.07	33.3169	98.8869	1.85311	89.8473	204.708	730.547	433.682	1164.23	1.33678	1.5605	1.05696		1.04596	1.41774	3.79746	4.57439	3.89129	6.97027	0.0938347	2.39588	1.42679	1.10771	3	ENSMUST00000100167|ENSMUST00000154748|ENSMUST00000134776	14|14|14	14	>1|CTCCTCGCTCAGCCGGCCGCCCGC|>2|CTCCTCGCTCAGCCGGCCGCCCGC|>3|CTCCTCGCTCAGCCGGCCGCCCGC|	-	||	14361688|14361688|14361688	-	-
chr16:20426395..20426445,-	20426426	p1@Abcc5	[Abcc5]	Abcc5			Abcc5	7.33752	120.615	89.7709	69.16	90.2953	44.6583			6.084	129.698	98.8869	38.9153	99.6744	86.1926	421.837	459.451	881.288	3.15186	-0.999271	-0.415684	2.58172	-0.197146	-0.378194	4.74992	5.12077	0.959396	2.24132	-3.79052	-2.87946	-0.0929017	-0.0619634	3	ENSMUST00000079158|ENSMUST00000115547|ENSMUST00000096199	159|159|159	159	>1|CATCGCGCTTGCGCGTTGTGGGGGACTATGCCGCTATAAAGGCTTGTTTTGCTCAGGGTCCGATGTTCGCGAGCGTGCCCGGGCTGTTTGCTCTCGTGTGGGGAGGCTGGGGTGCAGAATTTCTGAAGTGAAAGGAGGAGTCTGCACCCTGGTCCTCTGTGTGGTGAAG|>2|CATCGCGCTTGCGCGTTGTGGGGGACTATGCCGCTATAAAGGCTTGTTTTGCTCAGGGTCCGATGTTCGCGAGCGTGCCCGGGCTGTTTGCTCTCGTGTGGGGAGGCTGGGGTGCAGAATTTCTGAAGTGAAAGGAGGAGTCTGCACCCTGGTCCTCTGTGTGGTGAAG|>3|CATCGCGCTTGCGCGTTGTGGGGGACTATGCCGCTATAAAGGCTTGTTTT…	-	||	20332676|20332676|20402371	-	-
chr16:20426366..20426387,-	20426372	p2@Abcc5	[Abcc5]	Abcc5			Abcc5	0	54.8248	89.7709	30.4304	105.923	65.9241			0	57.1147	76.5576	16.678	30.885	62.8488	346.874	244.084	590.958	5.95095	-0.442554	0.943815		-0.28262	-0.876362	8.18086	8.06794	2.47822	2.45568	-5.70264	-5.61226	0.482895	-0.274674	3	ENSMUST00000079158|ENSMUST00000115547|ENSMUST00000096199	105|105|105	105	>1|AGGGTCCGATGTTCGCGAGCGTGCCCGGGCTGTTTGCTCTCGTGTGGGGAGGCTGGGGTGCAGAATTTCTGAAGTGAAAGGAGGAGTCTGCACCCTGGTCCTCTGTGTGGTGAAG|>2|AGGGTCCGATGTTCGCGAGCGTGCCCGGGCTGTTTGCTCTCGTGTGGGGAGGCTGGGGTGCAGAATTTCTGAAGTGAAAGGAGGAGTCTGCACCCTGGTCCTCTGTGTGGTGAAG|>3|AGGGTCCGATGTTCGCGAGCGTGCCCGGGCTGTTTGCTCTCGTGTGGGGAGGCTGGGGTGCAGAATTTCTGAAGTGAAAGGAGGAGTCTGCACCCTGGTCCTCTGTGTGGTGAAG|	-	||	20332676|20332676|20402371	-	-
chr3:121518078..121518127,-	121518113	p1@Abcd3	[Abcd3]	Abcd3			Abcd3	18.3438	128.838	448.854	33.1968	43.4112	189.266			6.084	39.2664	130.786	14.8249	35.0966	170.59	861.911	396.647	1258.56	0.838522	-1.24363	-1.55849		0.38204	-0.15981	4.93939	4.69511	2.79074	3.75	-2.14865	-0.945106	-1.16316	0.323337	2	ENSMUST00000197383	78	78	>1|CTATCCTCCCAGTTTCCCCCGCGGTTCCTGCACTGAGGTTGTCGCCGGCGCGTCCCCTATCCCGCGGCTCGCTCGCCCTGCCGGTGCC|	Inr	-	121463149	ENSMUST00000029770	78	78
chr12:85958276..85958369,-	85958339	p1@Abcd4	[Abcd4]	Abcd4			Abcd4	20.1782	35.6361	193.007	38.7296	85.0859	146.734			6.084	11.8989	44.6586	12.9718	57.5584	68.2358	519.372	201.408	720.779	0.923833	-0.394275	1.24393		0.606062	2.22729	3.47007	3.11538	2.5661	3.22878	-0.90397	0.113398	0.12055	1.14118	1	ENSMUST00000021666	70	70	>1|GCGGGGCCCCGAGCTCTGAGGACTCTGCCCGGGGAGGACACCGGGCTTGCTCGGTCGCCTCGTCGCTTGCATCCCGGGTC|	-	-	85944040	-	-
chr8:82235530..82235594,-	82235575	p1@Abce1	[Abce1]	Abce1			Abce1	260.482	1022.48	5871.02	517.317	1208.57	3134.59			52.728	615.173	1167.5	189.017	496.968	1337.78	12014.5	3859.17	15873.6	0.988492	-0.905228	0.241113	1.83207	0.196337	-0.307561	4.72332	5.06612	3.0684	3.27558	-1.65492	-1.79054	-0.557603	0.140908	1	ENSMUST00000080536	162	162	>1|CTATGCCCTCATGCCTTGCGCGAGGCGGCGGCTGTGCACCGCCATCTTTGCCGGTGGCGGTAAGAACACGCTGTGTGCTAAGACCTGACGGCTAGCGCTGCTTTGGCTACTGCACGCCCCGCTGTAAGGGGCCCGCTGTCTCCAGAAGAACTGGATATTCTTTGTTACAATT|	-	-	82209128	-	-
chr17:36106669..36106730,-	36106696	p1@Abcf1	[Abcf1]	Abcf1			Abcf1	324.685	4561.43	29431.4	2498.06	11790.5	18073.8			134.862	2760.55	15968.6	568.905	2998.65	9732.59	66679.9	32164.2	98844.1	2.94176	-0.703437	1.36997	2.07263	-0.714317	0.119341	6.70785	7.11236	3.57928	4.48283	-3.12857	-2.62953	-0.0846253	-0.504181	1	ENSMUST00000043757	34	34	>1|AAACGGCGCCGGGCGCCGCTGGAGGACTCTTAACTGCCGCCGCG|	-	-	36094367	-	-
chr17:36106642..36106656,-	36106647	p2@Abcf1	[Abcf1]	Abcf1			Abcf1	5.50314	106.908	210.962	27.664	751.882	484.861			0	67.8237	54.2283	5.55933	78.6164	107.741	1587.78	313.969	1901.75	2.23006	1.19866	2.80836		0.983885	0.21159	5.72884	7.93725	5.45713	4.94663	-0.27171	-2.99062	1.96553	0.650838	1	ENSMUST00000043757	-15	0	>1||	-	-	36094367	-	-
chr5:24083188..24083247,-	24083195	p1@Abcf2	[Abcf2]	Abcf2			Abcf2	40.3564	150.768	1135.6	66.3936	328.189	929.317			24.336	47.5956	542.283	38.9153	103.886	766.755	2650.63	1523.77	4174.4	0.711307	-0.289073	1.11961	0.666323	0.499331	1.11795	4.97716	4.57114	4.23313	4.46608	-0.744035	-0.105057	-0.00307601	0.56604	1	ENSMUST00000030795	72	72	>1|AGGAGCAGCTCTGTTGCGACAGAGGCCGAGCGGCGAGGCCCCACTCCTGAAAGGACTGTAACTACCCCTGTGGCTCATCACC|	-	-	24071683	-	-
chr16:20548710..20548745,+	20548737	p1@Abcf3	[Abcf3]	Abcf3			Abcf3	33.0188	41.1186	516.183	77.4592	34.729	959.089			15.21	7.13934	236.053	22.2373	11.2309	211.89	1661.6	503.76	2165.36	1.21775	0.893139	-0.240467	0.533379	-0.155444		4.05671	3.9553	3.67292	3.29792	-0.38379	-0.657381	0.859215	-0.0745777	1	ENSMUST00000003319	8	8	>1|ATTGGATCCCGAGTGAAC|	-	-	20548745	-	-
chr6:58590530..58590590,+	58590539	p1@Abcg2	[Abcg2]	Abcg2			Abcg2	14.675	98.6847	1184.98	11.0656	45.1476	321.114			12.168	89.2417	395.548	12.9718	53.3468	335.792	1675.66	899.068	2574.73	-0.39186	-1.88206	-1.11958	0.0887504	-0.235959	-0.736918	6.40298	5.25958	4.98693	4.85413	-1.41605	-0.405457	-1.78142	-0.305187	7	ENSMUST00000145161|ENSMUST00000203146|ENSMUST00000114294|ENSMUST00000204948	101|101|101|184	121.75	>1|CGGGGCGGGCAGACGCTCCTGGCGGGCGAGCGTGTGCAGGTCTGAGTGTGTGCGAGTTCTGGCGCGGCTGCTGCTCCGCCAGGGACCGCGAGAAAGGCATAAATCCTAAAG|>2|CGGGGCGGGCAGACGCTCCTGGCGGGCGAGCGTGTGCAGGTCTGAGTGTGTGCGAGTTCTGGCGCGGCTGCTGCTCCGCCAGGGACCGCGAGAAAGGCATAAATCCTAAAG|>3|CGGGGCGGGCAGACGCTCCTGGCGGGCGAGCGTGTGCAGGTCTGAGTGTGTGCGAGTTCTGGCGCGGCTGCTGCTCCGCCAGGGACCGCGAGAAAGGCATAAATCCTAAAG|>4|CGGGGCGGGCAGACGCTCCTGGCGGGCGAGCGTGTGCAGGTCTGAGTGTGT…	-	|||	58605650|58605650|58605650|58605650	-	-
chr16:45743001..45743060,-	45743013	p1@Abhd10	[Abhd10]	Abhd10			Abhd10	66.0377	213.817	206.473	63.6272	491.415	182.886			35.49	157.065	89.3172	31.5029	131.963	102.354	1224.26	547.693	1771.95	-0.0532352	-0.174557	1.19866	-0.169395	0.195531	-0.25036	2.66086	2.77816	3.39545	2.87526	0.734597	0.0971059	0.601047	-0.0844407	2	ENSMUST00000066983|ENSMUST00000128348	10|-1	5	>1|GCGCAGGGGCAGCTGGGAAG|>2||	-	|	45731727|45731727	-	-
chr5:135485503..135485569,+	135485548	p1@Abhd11	[Abhd11]	Abhd11			Abhd11	1.83438	68.531	103.237	44.2624	57.3028	76.557			19.266	28.5574	31.899	7.41244	44.9237	93.3754	351.724	225.434	577.158	4.26118	-0.428925	-0.256106	-1.32083	1.5348	0.64454	6.20547	1.62476	1.58574	4.13273	-4.61973	2.50798	0.0369792	0.86598	4	-	-		-	-	-	-	ENSMUST00000046999|ENSMUST00000201890|ENSMUST00000154469	33|33|415	160.333
chr2:150730356..150730484,-	150730398	p1@Abhd12	[Abhd12]	Abhd12			Abhd12	69.7064	548.248	982.991	94.0576	1120.01	1146.23			70.98	140.407	25.5192	44.4746	40.7121	62.8488	3961.24	384.942	4346.18	0.42959	0.22154	1.02994	-0.668428	1.28374	-1.77361	4.44742	1.21927	4.58328	1.21024	0.135856	-0.00902736	0.559898	-0.67655	1	ENSMUST00000056149	116	116	>1|TGTGACCCGCAGTGGGCTCCCGGCTCCGGGTGGTGACGGCTGTGAGCGGCGGCGACTGCAGCGAGGTCGGCGCAGGCGGGCGGGCGAAACCAGGGCGCCGAGAGCTGCTGCCGACAGGGCCGCGGG|	-	-	150658836	-	-
chr9:106349915..106350020,-	106349981	p1@Abhd14a	[Abhd14a]	Abhd14a			Abhd14a	29.3501	90.461	13.4656	0	74.6673	129.722			40.56	58.3046	70.1778	0	53.3468	82.6013	337.666	304.991	642.656	-5.89966	3.22102	-0.275143	-6.35966	0.233614	-0.127068	1.80668	1.65137	8.6787	8.09221	6.87202	6.44084	0.615015	-0.313294	4	ENSMUST00000048685|ENSMUST00000171925|ENSMUST00000171678|ENSMUST00000190798	311|126|435|430	325.5	>1|CTGGGTGGCTGGACTTTAGCCGTCTGGTTACCAAGGAGGCTGTACCACAGCCGCTAGGCTGTTTGGCAGTTGGTTCCGCCTAGGCCGGGCCCCGCCTCACCGGAGCCTTTCTGGTCACTCCTGTCCACGCGTCTGCATCAGAACCCCTACAGTTGTCTAGTCTTGGGCACCCAAGTTGCCATGGCAACGAGAGGAAGAGTGTGCTCTTTCTGCACCCGGCTCCTGATTTTCTATCAGCACTGGAAGATCTGCTGAAGCCCACGCACAGCCTGACTTCGGAGCTAGGGAGTGAGGCCTGCAGAAGAGTTCCACAGAGGTTCT|>2|CTGGGTGGCTGGACTTTAGCCGTCTGGTTACCAAGGAGGCTGTACCACAGCCGCTAGGCTGTTTGGCAGTT…	-	|||	106342552|106342552|106342552|106343044	-	-
chr17:35226174..35226252,+	35226237	p1@Abhd16a	[Abhd16a]	Abhd16a			Abhd16a	5.50314	35.6361	246.87	74.6928	76.4037	116.962			14.196	15.4686	130.786	3.70622	23.8657	57.4618	556.068	245.484	801.552	3.64681	-1.07447	1.08961		-1.17954	0.609616	5.55897	3.31991	1.36639	4.28199	-4.19258	0.96208	-0.10338	-0.912052	1	ENSMUST00000007251	32	32	>1|GCGGGGACCTGAGGCCGAGGGACAGCGGCCCGAGCCGGGGCT|	-	-	35226269	-	-
chr7:86418134..86418156,+	86418140	p1@Abhd2	[Abhd2]	Abhd2			Abhd2	84.3815	156.251	1476.73	74.6928	135.443	1167.49			87.204	113.04	813.424	1.85311	412.736	721.863	3094.99	2150.12	5245.11	-0.174855	-0.338862	-0.205471	-5.22	-0.17217	1.86377	4.26636	3.4018	4.11558	8.91403	-0.150774	5.51224	-0.317903	0.164875	1	ENSMUST00000037315	191	191	>1|GGTTCCGGCTGTATTTCTATGAGCGCAGCCGGCAGCTGCGGAGCTGCGGGAACCGGACTCCGGGCGGGTTGGACTGCTGGAGTCAATGAGAGAAGCTTTTAGGTTAATTTGAATATAAGATCAGATCTGATTGGCCCACCTGGACACCCCTTCAAGGAAAGCCCGTATTCTCCGAGAGAGGAATAAGCGACATAGATCAAG|	-	-	86441899	-	-
chr9:122260841..122260856,+	122260849	p1@Abhd5	[Abhd5]	Abhd5			Abhd5	38.522	142.545	201.984	99.5904	368.127	297.722			40.56	122.559	44.6586	25.9435	37.9043	52.0747	1148.49	323.7	1472.19	1.35894	0.558574	1.3657	-0.634818	0.219369	-1.68001	3.14436	2.03023	2.73497	1.77467	-0.409385	-0.255557	0.997811	-0.839134	2	ENSMUST00000111497	55	55	>1|NNNNNNNNNNAGTCGGCCTGTCAGCCGGCTTCGAGGTGTGTCCCTGCGCTTGCGCGGCGGCGGTG|	-	-	122260904	ENSMUST00000156520	55	55
chr2:22895612..22895647,-	22895623	p2@Abi1	[Abi1]	Abi1			Abi1	11.0063	134.321	201.984	99.5904	210.11	229.671			30.42	58.3046	89.3172	79.6837	85.6357	186.751	886.683	530.112	1416.8	3.12081	0.184895	0.643532	1.37477	1.05991	0.550682	4.87142	2.26017	2.13712	1.76692	-2.7343	-0.493253	0.63431	0.981648	11	ENSMUST00000126112|ENSMUST00000123948|ENSMUST00000153931|ENSMUST00000091394|ENSMUST00000139038|ENSMUST00000114544|ENSMUST00000093171	39|39|39|39|39|39|39	39	>1|CTTCCTCTGTCTCTTTAATGCGAGAGGAAGCGATGCGGAGGGGTGGAAA|>2|CTTCCTCTGTCTCTTTAATGCGAGAGGAAGCGATGCGGAGGGGTGGAAA|>3|CTTCCTCTGTCTCTTTAATGCGAGAGGAAGCGATGCGGAGGGGTGGAAA|>4|CTTCCTCTGTCTCTTTAATGCGAGAGGAAGCGATGCGGAGGGGTGGAAA|>5|CTTCCTCTGTCTCTTTAATGCGAGAGGAAGCGATGCGGAGGGGTGGAAA|>6|CTTCCTCTGTCTCTTTAATGCGAGAGGAAGCGATGCGGAGGGGTGGAAA|>7|CTTCCTCTGTCTCTTTAATGCGAGAGGAAGCGATGCGGAGGGGTGGAAA|	TOP|TOP|TOP|TOP|TOP|TOP|TOP	||||||	22797391|22797391|22797391|22797391|22797391|22797391|22797391	ENSMUST00000140164|ENSMUST00000149719|ENSMUST00000078977|ENSMUST00000178908	39|39|39|39	39
chr2:22895697..22895721,-	22895714	p1@Abi1	[Abi1]	Abi1			Abi1	232.966	1022.48	1526.11	232.378	1442.99	1352.51			286.962	831.733	822.994	253.876	974.282	1089.98	5809.43	4259.82	10069.3	-0.00364215	-0.174157	0.496777	-0.176408	0.40513	0.228091	3.4487	2.52559	3.58572	3.02094	0.137023	0.495353	0.122392	0.255592	11	ENSMUST00000126112|ENSMUST00000140164|ENSMUST00000149719|ENSMUST00000123948|ENSMUST00000153931|ENSMUST00000091394|ENSMUST00000139038|ENSMUST00000114544|ENSMUST00000078977|ENSMUST00000093171|ENSMUST00000178908	130|130|130|130|130|130|130|130|130|130|130	130	>1|NNNNNNNNNTGCAGTCCCACAATACCCGGCGGAGGGAGGGTGGGTGGTTGGCGTCTGGTCTGTGCGGAGCTCGGGTCCCCGGCGGACTCAGCTTCCTCTGTCTCTTTAATGCGAGAGGAAGCGATGCGGAGGGGTGGAAA|>2|NNNNNNNNNTGCAGTCCCACAATACCCGGCGGAGGGAGGGTGGGTGGTTGGCGTCTGGTCTGTGCGGAGCTCGGGTCCCCGGCGGACTCAGCTTCCTCTGTCTCTTTAATGCGAGAGGAAGCGATGCGGAGGGGTGGAAA|>3|NNNNNNNNNTGCAGTCCCACAATACCCGGCGGAGGGAGGGTGGGTGGTTGGCGTCTGGTCTGTGCGGAGCTCGGGTCCCCGGCGGACTCAGCTTCCTCTGTCTCTTTA…	-	||||||||||	22797391|22797391|22797391|22797391|22797391|22797391|22797391|22797391|22797391|22797391|22797391	-	-
chr2:22895658..22895694,-	22895679	p3@Abi1	[Abi1]	Abi1			Abi1	25.6813	213.817	318.687	121.722	781.402	746.431			60.84	171.344	169.065	92.6555	335.524	518.952	2207.74	1348.38	3556.12	2.22289	1.22657	1.86724	0.602813	1.61515	0.967461	4.34754	2.47449	3.64439	3.19817	-0.703148	0.723684	1.56241	1.23803	11	ENSMUST00000126112|ENSMUST00000140164|ENSMUST00000149719|ENSMUST00000123948|ENSMUST00000153931|ENSMUST00000091394|ENSMUST00000139038|ENSMUST00000114544|ENSMUST00000078977|ENSMUST00000093171|ENSMUST00000178908	95|95|95|95|95|95|95|95|95|95|95	95	>1|GAGGGTGGGTGGTTGGCGTCTGGTCTGTGCGGAGCTCGGGTCCCCGGCGGACTCAGCTTCCTCTGTCTCTTTAATGCGAGAGGAAGCGATGCGGAGGGGTGGAAA|>2|GAGGGTGGGTGGTTGGCGTCTGGTCTGTGCGGAGCTCGGGTCCCCGGCGGACTCAGCTTCCTCTGTCTCTTTAATGCGAGAGGAAGCGATGCGGAGGGGTGGAAA|>3|GAGGGTGGGTGGTTGGCGTCTGGTCTGTGCGGAGCTCGGGTCCCCGGCGGACTCAGCTTCCTCTGTCTCTTTAATGCGAGAGGAAGCGATGCGGAGGGGTGGAAA|>4|GAGGGTGGGTGGTTGGCGTCTGGTCTGTGCGGAGCTCGGGTCCCCGGCGGACTCAGCTTCCTCTGTCTC…	-	||||||||||	22797391|22797391|22797391|22797391|22797391|22797391|22797391|22797391|22797391|22797391|22797391	-	-
chr1:60466504..60466598,+	60466526	p1@Abi2	[Abi2]	Abi2			Abi2	14.675	350.879	246.87	22.1312	168.435	59.5444			18.252	49.9754	25.5192	0	18.2502	8.9784	862.535	120.975	983.51	0.576613	-2.04257	-1.05656		-1.45686	-1.42867	5.30097	2.01885	3.33568	5.7933	-1.96529	3.77445	-1.29026	-1.76506	4	ENSMUST00000052332|ENSMUST00000188594|ENSMUST00000188618|ENSMUST00000189980	120|120|120|120	120	>1|GCCGCTCGCTCCTCCCGATTCCCGCCGCGTCCGCCGCTGCTCCTCCTCTCCCGGGCGTCGCGGCCGCTGCCTCTGCGGGCTGTATNNNNNNNNNNNNNNNNNNNNNNNNNNNNNNNNNNNNNNTGTGAAG|>2|GCCGCTCGCTCCTCCCGATTCCCGCCGCGTCCGCCGCTGCTCCTCCTCTCCCGGGCGTCGCGGCCGCTGCCTCTGCGGGCTGTATNNNNNNNNNNNNNNNNNNNNNNNNNNNNNNNNNNNNNNTGTGAAG|>3|GCCGCTCGCTCCTCCCGATTCCCGCCGCGTCCGCCGCTGCTCCTCCTCTCCCGGGCGTCGCGGCCGCTGCCTCTGCGGGCTGTATNNNNNNNNNNNNNNNNNNNNNNNNNNNNNNNNNNNNNNTGTGA…	TOP|TOP|TOP|TOP	|||	60466646|60466646|60466646|60466646	-	-
chr2:31543850..31543906,+	31543865	p3@Abl1	[Abl1]	Abl1			Abl1	14.675	38.3774	13.4656	5.5328	177.118	212.658			71.994	24.9877	19.1394	12.9718	0	46.6877	461.827	175.781	637.608		3.93197	2.19177	-2.42792	1.26466		1.7863	-0.699942	6.01552	1.80847	4.22923	2.50841	2.56218	-0.954965	0	-	-		-	-	-	-	-	-
chr13:23515705..23515753,-	23515744	p1@Abt1	[Abt1]	Abt1			Abt1	141.247	1258.23	1279.23	395.595	2076.79	2405.17			335.634	1632.53	2153.18	283.526	1354.73	1905.22	7556.27	7664.82	15221.1	1.48253	0.910592	0.722735	-0.243015	-0.176472	-0.269014	4.16228	3.49365	3.50037	3.52098	-0.661908	0.0273285	0.864497	-0.217924	1	ENSMUST00000041782	44	44	>1|GTGCGTCATCAGATGGCGACAGATTCACGGCTGTCGTGCTCCCCAGATCTTGCC|	-	-	23513841	-	-
chr18:74938857..74938878,+	74938865	p1@Acaa2	[Acaa2]	Acaa2			Acaa2	18.3438	65.7898	246.87	30.4304	27.7832	316.861			21.294	15.4686	433.826	0	103.886	357.34	706.078	931.815	1637.89	0.714936	0.359455	-1.22884		-0.279464	2.70862	4.05474	4.36726	3.4801	9.85089	-0.574635	5.48363	0.180075	-0.0289617	1	ENSMUST00000041053	38	38	>1|GTGGCCGGGTGTTGCTGAGAGAGCCCCGCGGAATAGCTGAGCTTCGCC|	-	-	74938903	-	-
chr9:26807076..26807142,-	26807112	p1@Acad8	[Acad8]	Acad8			Acad8	12.8407	76.7548	166.076	44.2624	769.246	844.254			28.392	98.7609	60.6081	35.2091	67.3855	79.0099	1913.43	369.365	2282.8	1.74646	2.34235	3.31669	0.305621	0.379771	-0.548122	4.18902	2.46815	5.17221	2.04043	0.983192	-0.427722	2.69449	-0.0479675	2	ENSMUST00000120367|ENSMUST00000060513	32|32	32	>1|GGCCTGGGCTAAGAGGCCTGGGGTCTGAGATTCGAAGTTTAC|>2|GGCCTGGGCTAAGAGGCCTGGGGTCTGAGATTCGAAGTTTAC|	-	|	26783292|26783292	-	-
chr3:35964986..35965024,+	35965003	p1@Acad9	[Acad9]	Acad9			Acad9	9.1719	19.1887	139.145	11.0656	43.4112	170.127			0	8.32923	19.1394	7.41244	5.61546	131.085	392.109	171.581	563.69		0.289081	1.15722		2.74417		4.03757	5.80574	4.20995	4.11602	0.172382	-1.68972	0.422081	2.37031	2	ENSMUST00000196648	27	27	>1|GGCTTCCAGCGACTTGAAGTCTGAAGTCAGGAGCAGC|	-	-	35965030	ENSMUST00000011492	27	27
chr3:35964968..35964985,+	35964976	p2@Acad9	[Acad9]	Acad9			Acad9	7.33752	57.5661	359.084	0	32.9925	253.064			12.168	32.127	271.141	20.3842	32.2889	271.148	710.043	639.257	1349.3		-0.50398	-0.793857	0.721224	3.29018e-05	0.00713862	5.73402	4.58371	9.16267	3.86329	3.42865	-0.720426	-0.566904	0.0377867	2	ENSMUST00000011492|ENSMUST00000196648	54|54	54	>1|GATTGGCGTCATTGGGAGGAGCGGCGGGGCTTCCAGCGACTTGAAGTCTGAAGTCAGGAGCAGC|>2|GATTGGCGTCATTGGGAGGAGCGGCGGGGCTTCCAGCGACTTGAAGTCTGAAGTCAGGAGCAGC|	-	|	35965030|35965030	-	-
chr1:66909839..66909859,-	66909850	p1@Acadl	[Acadl]	Acadl			Acadl	23.8469	79.496	807.938	146.619	279.568	925.064			19.266	28.5574	689.018	22.2373	370.62	669.789	2262.53	1799.49	4062.02	2.59517	0.195196	1.80778	0.202041	-0.0408065	3.67491	5.18864	5.18304	3.03413	5.51664	-2.15451	0.333594	0.568071	0.527935	1	ENSMUST00000027153	28	28	>1|NNNNNNNNNNNNNNNNNNNNNNNNNNNNNNNNNNNNNN|	-	-	66878007	-	-
chr3:153607425..153607478,-	153607434	p1@Acadm	[Acadm]	Acadm			Acadm	49.5283	633.227	3918.5	218.546	706.734	1254.68			29.406	79.7226	574.182	79.6837	119.328	337.588	6781.22	1219.91	8001.13	2.13042	-1.64259	0.158327	1.42287	-0.765366	0.578889	6.50769	4.45168	3.16296	2.51213	-3.34472	-1.93955	-1.07755	-0.348406	2	ENSMUST00000150070	157	157	>1|CGTCCGTTTTGCTTGCTGCACGGAGGTGGTCGGAGGCAGCAGATCGAGGAGCCATCATGGCAGCGGCGTTCCGCAGAGGCTGCAGGAGTTGACGGAACAGCAGAAAGAGTTTCAAGCAACTGCCCGCAAGTTTGCCAGAGAGGAGATTATCCCCGTCGCCCCGGAAT|	-	-	153599328	ENSMUST00000072697	46	46
chr3:153607389..153607416,-	153607407	p2@Acadm	[Acadm]	Acadm			Acadm	124.738	556.472	2531.54	157.685	522.671	1022.89			71.994	95.1912	446.586	20.3842	88.4434	298.083	4915.99	1020.68	5936.67	0.33694	-1.30695	-0.090323	-1.79545	-0.582421	-0.105498	4.62417	2.9031	3.28891	4.21195	-1.33526	1.30885	-0.915325	-0.592392	2	ENSMUST00000150070	130	130	>1|GGTCGGAGGCAGCAGATCGAGGAGCCATCATGGCAGCGGCGTTCCGCAGAGGCTGCAGGAGTTGACGGAACAGCAGAAAGAGTTTCAAGCAACTGCCCGCAAGTTTGCCAGAGAGGAGATTATCCCCGTCGCCCCGGAAT|	-	-	153599328	ENSMUST00000072697	19	19
chr5:115569286..115569354,-	115569313	p1@Acads	[Acads]	Acads			Acads	11.0063	52.0836	332.152	22.1312	72.9308	212.658			9.126	41.6462	57.4182	1.85311	22.4618	68.2358	702.963	200.741	903.704	0.975892	-0.642089	0.481773		0.247046	-0.876164	5.06337	3.37062	3.66008	5.27636	-1.40329	1.90574	-0.360598	-0.224134	1	ENSMUST00000031524	35	35	>1|CCGGAACTCCAGAGCTGCTGCAGGAGGTCCTGGAGGTCTGTGCCC|	-	-	115560862	-	-
chr7:138554147..138554240,+	138554168	p1@Acadsb	[Acadsb]	Acadsb			Acadsb	31.1845	71.2723	336.641	24.8976	119.815	372.152			14.196	113.04	382.788	0	162.848	373.501	955.962	1046.37	2002.34	-0.319083	0.144479	0.745317		-0.0353849	0.524756	3.68818	5.0778	4.27726	10.0684	0.589082	4.99058	0.234998	0.0725407	2	ENSMUST00000015829|ENSMUST00000117518	91|91	91	>1|CGGAGTGGGCAGGGCCCGAGCTTGCCAGGCCGAGGGAGTCTTGCGCAAGGGTTCGTGGAAAGCCTTGCGAGCTTAACAGGGCCACCCTGCCCGAAGCGAGG|>2|CGGAGTGGGCAGGGCCCGAGCTTGCCAGGCCGAGGGAGTCTTGCGCAAGGGTTCGTGGAAAGCCTTGCGAGCTTAACAGGGCCACCCTGCCCGAAGCGAGG|	-	|	138554259|138554259	-	-
chr11:69828848..69828937,-	69828896	p1@Acadvl	[Acadvl]	Acadvl			Acadvl	23.8469	68.531	489.251	49.7952	161.49	725.165			27.378	33.3169	156.305	7.41244	53.3468	371.706	1518.08	649.465	2167.54	1.04668	0.567255	1.23058	-1.81693	1.24713	0.671116	4.51918	2.76973	4.14069	5.74907	-0.378489	2.97934	0.686633	0.993235	2	ENSMUST00000102574|ENSMUST00000018718	71|71	71	>1|GGGCCCAGACACACAACCTTTGGGCAGGCGAGACGCGAAGAGAAGAGGTCAGTGGTCAAGACTTCGGCGGCGGCTTTGGAG|>2|GGGCCCAGACACACAACCTTTGGGCAGGCGAGACGCGAAGAGAAGAGGTCAGTGGTCAAGACTTCGGCGGCGGCTTTGGAG|	-	|	69823797|69823797	-	-
chr16:31201236..31201329,-	31201248	p1@Acap2	[Acap2]	Acap2			Acap2	42.1907	512.612	2962.44	135.554	236.157	746.431			29.406	74.9631	226.483	27.7966	165.656	143.654	4635.38	667.959	5303.34	1.67218	-1.98798	-1.11648	-0.0798038	-0.654969	1.1387	6.34717	3.33578	2.85315	3.45268	-3.49403	0.116899	-1.6529	0.0269804	1	ENSMUST00000058033	172	172	>1|GAGCCGTTGCAGTCTTCGCGGCTGCTATGCCCAGGGAGCGCAGCGCTCTCCGCAGCTCCGCGCAGCCCTAGAGGCAGCCGAGCGCCCGCCGACGCCGCCCGGATCCCCGGTGCCACCGCTACCCCGGTCCCGCAGCTCCCGCGGATCCTCCGGCGTTGCCTGTGAGGCCAGGAGGAGGCAAG|	-	-	31096431	-	-
chr9:53418434..53418472,-	53418456	p1@Acat1	[Acat1]	Acat1			Acat1	58.7002	241.229	1786.44	55.328	852.596	1452.46			9.126	65.444	178.634	3.70622	12.6348	276.535	4446.75	546.08	4992.83	-0.0846121	-0.2985	1.81932		0.629024	-2.32785	5.09843	4.66722	5.36798	6.10574	0.269546	1.43852	0.177985	0.209601	1	ENSMUST00000034547	77	77	>1|GGTGCCCGCCACGACGTCGCAAGCTCTGCGGTGGGGAAGTGGAGGCCGCGGCGCGTCTCTCTGCCCTTGACAGCCTTTCGCGTCTCC|	-	-	53390649	-	-
chr1:182656150..182656237,+	182656202	p1@Acbd3	[Acbd3]	Acbd3			Acbd3	9.1719	10.965	40.3969	24.8976	112.869	391.291			0	30.9371	41.4687	11.1187	30.885	100.558	589.592	214.968	804.56	1.39282	3.26002	3.30572		1.2678	-0.00239447	2.4228	7.18796	4.31255	3.5054	1.88975	-3.68256	3.11711	0.972532	1	ENSMUST00000027780	30	30	>1|GCCGCCGCCTGTCCCCGCCGAGGAGGCGCTGCGAGCGGAG|	-	-	182656232	-	-
chr1:157405242..157405362,+	157405251	p1@Acbd6	[Acbd6]	Acbd6			Acbd6	75.2096	65.7898	148.122	113.422	79.8766	531.646			60.84	89.2417	373.218	27.7966	74.4048	202.912	1014.07	828.413	1842.48	0.589504	1.84017	0.277989	-1.1162	-0.877547	-0.260721	1.50184	2.91599	2.42553	3.29543	0.923697	0.379442	1.3247	-0.777309	3	ENSMUST00000080138|ENSMUST00000035560|ENSMUST00000097529	516|516|516	516	>1|GGACCGCCTCCTTCCCTTTCCCCTGGGGGCCCTATCCGGGTGAGTTCCGGAGTTTGTGACTCCGAAGTCCCCCCCAAAACCACGAGCGACGTCCCCTGTCTGTCACCGAGGCCCGTATCTCCATCCCGCACCGCGGCCGCCGCAACCCACGCTAGCGGAGCAGGCGGGGCCCCGTATCCACCGGCGCGTGCCCGGGTGCGCGTCCGACCCGCCGAGCTCGCGCCCCGCTTCACCTCCCAGCTCCCGTCCCAGCCGCACGCGCCGCGCCGCCGGCTTCCCCTCATCTTCCAGCCGAGCGGCCTCCAGACCCCGCACCGTTGGAGCGACCCGGGCGAAGCCCGAGGGGAAACCGGGGGAGGACGGGGCGGTCCTGTGCGCCCGGGTAGGCGGAGTGGC…	TOP|TOP|TOP	||	157405767|157405767|157405767	-	-
chr8:108224977..108225018,-	108224984	p1@Acd	[Acd]	Acd			Acd	27.5157	90.461	130.168	143.853	119.815	155.241			20.28	45.2158	15.9495	29.6498	99.6744	64.6445	667.053	275.414	942.467	2.36529	0.253242	0.403496	0.536951	1.9856	1.13175	2.98058	1.56926	0.932744	2.45066	-2.04784	0.881399	0.754271	1.2468	1	ENSMUST00000042608	67	67	>1|CTCTCCCGCTAGAGGCGGAGCGGCGGTGCTCGCGGGAAGACCCTTTCCTGGGGGTCGCCCAGGGTGCCGCCCTGCTA|	-	-	108222155	-	-
chr7:105457981..105458024,-	105458015	p1@Acer3	[Acer3]	Acer3			Acer3	14.675	320.725	368.061	63.6272	272.622	210.532			5.07	127.318	197.774	38.9153	117.925	116.719	1250.24	603.721	1853.96	2.07924	-0.804441	-0.234038	2.82301	-0.758285	-0.110125	5.50533	5.86924	2.91497	2.57672	-2.59036	-3.29253	-0.363213	-0.27087	2	ENSMUST00000033020	56	56	>1|CGGAGAGCGCGCTTTGCCTGAGCCGGCCCGAGAGCGGCTGAGCAGGGTGTGTGGGGCGTCAGCGCG|	-	-	105365346	-	-
chr14:55305442..55305484,-	55305454	p1@Acin1	[Acin1]	Acin1			Acin1	58.7002	315.243	1795.42	52.5616	170.172	168			11.154	54.7349	175.444	0	58.9623	113.128	2560.09	413.424	2973.52	-0.157933	-3.4139	-0.887524		-0.630804	0.106394	5.15629	4.30699	2.67415	8.43121	-2.48214	4.12421	-2.4715	-0.486664	3	ENSMUST00000147714	2	2	>1|GGACCCGAGTAC|	-	-	55261564	-	-
chr14:55305763..55305807,-	55305771	p3@Acin1	[Acin1]	Acin1			Acin1	260.482	797.701	1503.66	94.0576	1750.34	1278.08			95.316	931.684	210.533	40.7684	311.658	228.051	5684.32	1818.01	7502.33	-1.46468	-0.234421	1.13322	-1.21523	0.115047	-1.57834	3.14078	3.57606	5.00146	3.71041	1.86068	0.13435	0.285456	-1.0915	2	ENSMUST00000022793|ENSMUST00000111484	155|155	155	>1|CCCCAGGTCCGGAGATAGCCGAATATCTCCGATTATGGGTATGCCAGATTCGAGGGCTTCCGAAGAGATTCGATTCAAAGCCCCGGCAAGCCGAAAACAAACGAGCCTGAAAGCCAGATGGGAGGGGCCAGCCGCTAGGTAGATGGAAAAAGCCGATTGGTACCG|>2|CCCCAGGTCCGGAGATAGCCGAATATCTCCGATTATGGGTATGCCAGATTCGAGGGCTTCCGAAGAGATTCGATTCAAAGCCCCGGCAAGCCGAAAACAAACGAGCCTGAAAGCCAGATGGGAGGGGCCAGCCGCTAGGTAGATGGAAAAAGCCGATTGGTACCG|	-	|	55261564|55261564	-	-
chr14:55272499..55272538,-	55272513	p2@Acin1	[Acin1]	Acin1			Acin1	121.069	594.85	2329.55	196.414	854.332	933.57			115.596	179.673	870.843	87.0962	207.772	429.168	5029.79	1890.15	6919.94	0.695792	-1.31876	0.521905	-0.406379	-1.02002	0.209082	4.58854	3.17839	3.18303	2.86335	-1.40551	-0.315046	-0.617897	-0.687196	9	ENSMUST00000126166|ENSMUST00000141453|ENSMUST00000022794|ENSMUST00000148754|ENSMUST00000150371|ENSMUST00000123875	165|165|37|37|23|23	75	>1|GCTGCTGGGTAAGTGGCAAGATGGCTCCCCTGCATGTCTCCGGCTGATCGCTGCCGCTTTACCAATACAATAGAGTCTGCTTACTACCAGCAACCTGGCCCTCTTCCTCCTCTTCCTCCAGAGAGACCAGTCCAGCCGAACTCGGGGTTTGCCTGAAGAGAAGGAGGAAGTGACC|>2|GCTGCTGGGTAAGTGGCAAGATGGCTCCCCTGCATGTCTCCGGCTGATCGCTGCCGCTTTACCAATACAATAGAGTCTGCTTACTACCAGCAACCTGGCCCTCTTCCTCCTCTTCCTCCAGAGAGACCAGTCCAGCCGAACTCGGGGTTTGCCTGAAGAGAAGGAGGAAGTGACC|>3|GCTGCTGGGTAGGGATAAACAGCACTTCCAGGGGGAGA…	-	|||||	55261564|55261564|55261564|55261564|55261564|55264575	-	-
chr11:100389176..100389192,-	100389182	p1@Acly	[Acly]	Acly			Acly	18.3438	74.0135	412.946	8.2992	48.6205	350.886			9.126	28.5574	143.546	16.678	5.61546	125.698	913.109	329.22	1242.33	-1.09865	-0.234641	-0.601176	0.835553	-0.19084	-2.24837	4.69312	4.16438	5.50651	2.93986	0.813388	-1.22452	-0.308925	-0.291412	3	ENSMUST00000107385	98	98	>1|TGCTGCAGGCGGCTGGAGCGATCCGAAGAGTTGGGGTGAGCTGGTGCTTACGGACAGAGAGCCACACTCAGGCTTTCTCGAAGAGGTAAACCAGGTCTCTCTGCAGCC|	-	-	100362059	ENSMUST00000107389|ENSMUST00000007131	98|98	98
chr6:6905993..6906049,+	6906008	p1@Acn9	[Acn9]	Acn9			Acn9	31.1845	326.208	89.7709	118.955	194.482	36.1519			27.378	215.37	31.899	42.6215	165.656	21.5482	796.752	504.473	1301.23	1.91462	-1.30037	-0.744659	0.629281	-0.555291	-0.377625	3.7164	3.1518	0.95226	2.12198	-2.76413	-1.02982	-0.35469	-0.256528	1	ENSMUST00000040826	18	18	>1|CGCCCACCTTCTGCGCAGGCGCGGCGCG|	-	-	6906026	-	-
chr4:40090401..40090477,+	40090461	p1@Aco1	[Aco1]	Aco1			Aco1	29.3501	90.461	417.435	30.4304	173.645	423.19			4.056	7.13934	175.444	24.0904	9.82705	116.719	1164.51	337.277	1501.79	0.0512907	0.0197326	0.936968	2.43226	-0.585911		4.09014	5.32859	4.27144	2.36918	0.181298	-2.95941	0.223302	-0.308263	1	-	-		-	-	-	-	ENSMUST00000102973	143	143
chr4:40090493..40090535,+	40090514	p2@Aco1	[Aco1]	Aco1			Aco1	29.3501	161.733	798.961	35.9632	133.707	399.798			13.182	46.4057	102.077	3.70622	15.4425	193.933	1559.51	374.747	1934.26	0.288706	-0.997954	-0.273615		0.922572	-1.55689	5.00902	3.44479	3.87234	5.64087	-1.13668	2.19608	-0.797342	0.397333	1	-	-		-	-	-	-	ENSMUST00000102973	90	90
chr15:81702900..81702944,+	81702907	p1@Aco2	[Aco2]	Aco2			Aco2	93.5534	241.229	924.64	121.722	519.198	1167.49			29.406	122.559	242.432	25.9435	96.8666	416.598	3067.84	933.805	4001.64	0.377948	0.33629	1.10428	-0.17752	0.779831	-0.337847	3.6324	3.61133	3.78705	4.28068	0.154652	0.669352	0.521789	0.451237	1	-	-		-	-	-	-	ENSMUST00000023116	35	35
chr13:24923278..24923387,-	24923357	p1@Acot13	[Acot13]	Acot13			Acot13	117.4	2469.86	4017.25	290.472	222.265	410.431			24.336	466.437	762.386	27.7966	162.848	420.189	7527.67	1863.99	9391.67	1.30331	-3.28942	-3.47112	0.188198	-0.858713	-1.51528	5.78205	5.62929	1.12177	4.36612	-4.66027	-1.26317	-2.83811	-1.03611	1	ENSMUST00000006900	183	183	>1|CTGGGGCGCTAAAGAGTGAAGGTAACCCGTGATCATCTAGGACCAGGGCGACCGGGGCGCGCGATCCTTTCTCCCGAGCACGACGCGACAGCGGCCGGGCTTGCAGACTTGACCTTCCACACCCTTGTCCTCTCACAAACGTCTCTTCCAGAGTTCATTCTCGCAGAGCCCAGACTCTTGCTTTGCGTCCACG|	-	-	24909903	-	-
chr12:85328634..85328675,+	85328645	p2@Acot2	[Acot2]	Acot2			Acot2	0	0	8.97709	2.7664	83.3495	253.064			0	0	0	12.9718	57.5584	131.085	348.156	201.615	549.771		4.74176	7.38973		8.03985	6.85943			6.68853	3.81147			5.16359	8.65903	0	-	-		-	-	-	-	-	-
chr4:151560163..151560203,+	151560182	p2@Acot7	[Acot7]	Acot7			Acot7	3.66876	30.1537	228.916	38.7296	79.8766	114.836			11.154	23.7978	47.8485	31.5029	2.80773	156.224	496.18	273.335	769.515	3.23425	-0.992127	1.39072	1.45738	1.69668	-2.87691	5.96036	2.6301	2.31503	2.31757	-3.64533	-0.312528	-0.170219	1.19744	2	ENSMUST00000167926	127	127	>1|AGCTGCATACCTTTTCGCGAGTTGCACTGGGCCCAGCTAGATTCCCTTGAGGAGGCCCCTTCACTAAGCCAGATATTGGCCGGAAGCTGTCTGGTAGCTAAGCCTGGCGCTGGGAGGGAGGATAAACGCTTTGTCCC|	TOP	-	151560309	-	-
chrX:151697074..151697087,+	151697080	p1@Acot9	[Acot9]	Acot9			Acot9	190.776	1140.36	3729.98	318.136	1196.41	1473.72			63.882	490.235	1390.8	94.5086	404.313	1012.76	8049.38	3456.5	11505.9	0.736257	-1.33941	0.0692004	0.561401	-0.45742	-0.277688	4.67045	4.86911	3.0672	3.89922	-1.60324	-0.969881	-0.760044	-0.363537	1	ENSMUST00000026324	117	117	>1|ACCAAGATTCAGTCCGGCGCGGTTGCCGGTGTTTGGAGGTGTCCTCACGCTCACGCTCTTCTGCTACCGGTTTGTCTCTACCCGGGAGGACCTTGGTTGTCCACCCGTGGGTAGGCAGTGGAGTGCC|	Inr	-	151697197	-	-
chrX:151697003..151697024,+	151697017	p2@Acot9	[Acot9]	Acot9			Acot9	3.66876	76.7548	493.74	19.3648	123.288	82.9368			1.014	21.418	28.7091	29.6498	11.2309	48.4834	799.753	140.505	940.258		-2.56646	0.680173	4.31571	0.745874	-0.901802	7.09771	5.06347	3.37942	0.997959	-3.71829	-4.06551	-1.34582	0.799224	1	ENSMUST00000026324	180	180	>1|CCCTTCCTGCAGTGAGGCCCTCCCTATCCCGGGCCCTCTTGTGGCGTCACCTAGAAGGTGGGAACCAAGATTCAGTCCGGCGCGGTTGCCGGTGTTTGGAGGTGTCCTCACGCTCACGCTCTTCTGCTACCGGTTTGTCTCTACCCGGGAGGACCTTGGTTGTCCACCCGTGGGTAGGCAGTGGAGTGCC|	-	-	151697197	-	-
chrX:151697054..151697065,+	151697059	p3@Acot9	[Acot9]	Acot9			Acot9	60.5345	348.138	2176.94	58.0944	361.181	642.228			5.07	72.5833	315.8	5.55933	30.885	181.364	3647.12	611.261	4258.38	-0.0588631	-1.76035	0.0529899		-0.798436	-1.21947	5.37085	6.12552	4.09872	5.13385	-1.27212	-0.991668	-1.284	-0.85166	1	ENSMUST00000026324	138	138	>1|GGCGTCACCTAGAAGGTGGGAACCAAGATTCAGTCCGGCGCGGTTGCCGGTGTTTGGAGGTGTCCTCACGCTCACGCTCTTCTGCTACCGGTTTGTCTCTACCCGGGAGGACCTTGGTTGTCCACCCGTGGGTAGGCAGTGGAGTGCC|	-	-	151697197	-	-
chr11:116060015..116060150,-	116060092	p1@Acox1	[Acox1]	Acox1			Acox1	25.6813	161.733	444.366	35.9632	105.923	493.368			16.224	35.6967	95.697	5.55933	67.3855	116.719	1267.03	337.282	1604.32	0.477903	0.150754	-0.608255		0.285145	0.907245	4.53413	2.97938	4.03995	4.92914	-0.494187	1.94975	0.0079041	0.3605	2	ENSMUST00000072948	75	75	>1|CCTGAGCTGCGGAGACAGGTTGTCATCGCTTTGGTGCCTGTCACTTCTGTCGCCACCTCCTCTGCCCCCAGCACTGGTCTCCGTC|	-	-	116034861	ENSMUST00000066587	75	75
chr2:91042949..91042955,+	91042951	p2@Acp2	[Acp2]	Acp2			Acp2	11.0063	19.1887	112.214	66.3936	52.0934	472.102			13.182	20.2281	188.204	37.0622	133.367	122.106	732.997	514.15	1247.15	2.53945	2.06796	1.41752	1.457	-0.622093	2.69114	3.51898	3.93268	2.97154	2.76864	-0.547437	-1.16404	2.04828	0.399774	1	ENSMUST00000150403	140	140	>1|ACCAGACTTTCTCATTCCCGGTCTCCCGCAACCCAAAGAAAGATGGCGAAGGCTGCACTTCCGGCAAGTGTCCTTACGAATGCATCCGGGCGGCTGCAGCAGGTACCGCCCAAGGCGTTCCGGCCTCTTGCTACACAGCCTACAACAGTG|	-	-	91043091	-	-
chr2:91043060..91043091,+	91043075	p1@Acp2	[Acp2]	Acp2			Acp2	172.432	578.402	2962.44	716.498	1080.07	4652.97			119.652	273.675	2255.26	124.158	1096.42	1856.73	10162.8	5725.9	15888.7	2.05177	0.651277	0.900402	0.0531189	-0.280458	2.00029	4.35602	4.39588	2.99939	4.56645	-1.35664	0.170566	0.796421	0.216409	3	ENSMUST00000150403|ENSMUST00000002172|ENSMUST00000155418	16|16|16	16	>1|CTCTTGCTACACAGCCTACAACAGTG|>2|CTCTTGCTACACAGCCTACAACAGTG|>3|CTCTTGCTACACAGCCTACAACAGTG|	-	||	91043091|91043091|91043091	-	-
chr11:94463110..94463136,-	94463116	p1@Acsf2	[Acsf2]	Acsf2			Acsf2	0	2.74124	53.8625	11.0656	13.8916	112.709			0	1.18989	325.37	0	0	14.3654	194.27	340.925	535.195		1.0583			-4.45426		6.83551	9.35341	3.45806		-3.37746		1.27475	-4.45952	1	ENSMUST00000103164	33	33	>1|TTCAAAGTTTACTCCCGGCCCGGACCCGCGGCGGAAGCGAGCC|	InrAC	-	94419620	-	-
chr1:78654449..78654464,+	78654457	p1@Acsl3	[Acsl3]	Acsl3			Acsl3	137.578	282.348	1140.09	30.4304	53.8299	735.798			12.168	29.7473	73.3677	1.85311	25.2696	21.5482	2380.08	163.954	2544.03	-2.15839	-0.631419	-2.38021		-1.74429	-0.231137	3.36531	3.03197	4.67499	4.32974	1.30968	1.29777	-0.927346	-1.23555	3	ENSMUST00000035779|ENSMUST00000134566|ENSMUST00000142704	401|299|261	320.333	>1|GCGGCTCAACAGACGCTGCTCAGCCGGCGCCCGGGAAACGTCGCTGCGGTTGTGGCCGCGGTCGCGGGCTCGGACGAGGAGGCGGCGGCAGAGCGGGAGGCTGAGCCGGCAGCAGGCGGTCGTCCCCGTCTCGCAGGGCGGCCCCAGCAGCTGCGTCAGGGTCCTGAGGAGGTGGCGCTGGGCAGGAGCCGCTCTGAGGAGCAGCCAGGCCTGCGTGGGTCGGAGCCCGCGNNNNNNNNNNNNNNNNNNNNNNNNNNNNNNNNNNNNNNNNNNNNNNNNNNNNNNNNNNNNNNNNNNNNNNNNNNNNNNNNNNNNGCATATCACCAACTTTGGGTTGCTGAGTGGATTGCCATCCGTGTATATAACACTTGATTCTCATTGAAATCTGTTAATTCT…	-	||	78678207|78684889|78678207	-	-
chrX:138825034..138825063,-	138825046	p1@Acsl4	[Acsl4]	Acsl4			Acsl4	0	13.7062	269.313	5.5328	8.68224	99.9494			13.182	40.4563	159.495	12.9718	18.2502	68.2358	397.183	312.591	709.774		-1.42549		-0.0223399	-1.21889	-1.12718	9.1473	3.8729	4.1771	2.69085	-4.9702	-1.18206	-1.30603	-1.09574	3	ENSMUST00000112903|ENSMUST00000112904|ENSMUST00000033634	259|262|429	316.667	>1|CCCCGCCTCCGCTGGCTGTCCGGGTTGCGCGCGCGCCGCTGCGGCTCTCTCCCTCTCTCTCTCTTTTTTTTTCCACTGGTCTCCGCGGCTCGCCCCTCCTTGCCAGGCAGCTCCAGAGCTAGCGGGCACGCGAGCTCCTCTCCAGGAGCTTCCTTCCTCTTAAGGCCGGGACCCAGTGGCAGACTCGTAGCGAGCGAGGCAGCACCTTCGACTCAGATCACAGGAGATACACCTGTTCTTAAAAGTGAAAGAAGAAATCTAAAAACGCT|>2|CCCCGCCTCCGCTGGCTGTCCGGGTTGCGCGCGCGCCGCTGCGGCTCTCTCCCTCTCTCTCTCTTTTTTTTTCCACTGGTCTCCGCGGCTCGCCCCTCCTTGCCAGGCAGCTCCAGAGCTAGC…	-	||	138755219|138755219|138755219	-	-
chr19:55328183..55328216,+	55328194	p2@Acsl5	[Acsl5]	Acsl5			Acsl5	29.3501	153.51	197.496	13.832	27.7832	80.8102			16.224	72.5833	47.8485	0	78.6164	25.1395	502.781	240.412	743.193	-1.05849	-1.28396	-2.445		-0.915102	0.114435	3.55774	2.8542	2.92825	7.70399	-0.629489	4.84978	-1.63146	-0.395686	1	-	-		-	-	-	-	ENSMUST00000043150	491	491
chr8:126418644..126418660,-	126418650	p1@Acta1	[Acta1]	Acta1			Acta1	0	30.1537	309.71	80.2256	71.1944	399.798			6.084	19.0382	153.115	20.3842	53.3468	174.181	891.081	426.149	1317.23	7.33495	0.367831	1.2258	1.66538	0.185401	1.46256	9.41093	4.71277	2.54614	3.44873	-6.8648	-1.26405	0.696855	0.474893	1	ENSMUST00000034453	72	72	>1|ACAGGCGGTCACACGGACGTGAAGCCTCACTTCCTACCCTCGGCACCCAGGGCCAGAGTCAGAGCAGCAGAAACTAGACACC|	-	-	126415908	-	-
chr19:34329815..34329832,-	34329823	p1@Acta2	[Acta2]	Acta2			Acta2	1528.04	3536.2	11207.9	1969.68	11556.1	12398			806.13	1906.2	3633.3	789.425	1547.06	3013.15	42195.9	11695.3	53891.1	0.366172	0.145584	1.70824	-0.0301917	-0.269965	-0.301087	3.26996	2.77991	3.6039	2.52947	0.333941	-0.250436	0.671853	-0.246302	1	ENSMUST00000039631	68	68	>1|GCCTCCCGGGACACCACCCACCCAGAGTGGAGAAGCCCAGCCAGTCGCTGTCAGGAACCCTGAGACGCTGCTCCAGCT|	-	-	34316156	-	-
chr5:143666991..143667019,-	143666995	p12@Actb	[Actb]	Actb			Actb	18.3438	150.768	1032.37	11.0656	130.234	344.507			5.07	36.8866	612.461	0	78.6164	263.965	1687.28	996.999	2684.28	-0.70425	-1.58196	-0.21048		-1.21272	1.08146	5.97299	6.86628	5.36074	9.42241	-0.612244	2.55613	-1.30547	-0.932762	5	-	-		-	-	-	-	-	-
chr5:143667085..143667097,-	143667091	p13@Actb	[Actb]	Actb			Actb	1.83438	63.0486	516.183	5.5328	45.1476	106.329			3.042	0	51.0384	0	39.3082	23.3438	738.075	116.732	854.808		-2.27397	-0.477319		-1.11203	6.31499	7.9562	3.86301	4.65488	6.98076	-3.30132	3.11775	-1.8845	0.210446	5	-	-		-	-	-	-	-	-
chr5:143667375..143667397,-	143667387	p2@Actb	[Actb]	Actb			Actb	31.1845	131.58	902.197	207.48	171.908	238.177			17.238	27.3675	248.812	53.7402	30.885	127.493	1682.53	505.536	2188.06	2.7146	-1.91918	0.384422	1.61252	-0.961885	0.171494	5.0287	3.9633	0.981239	1.55049	-4.04746	-2.41281	-0.785646	-0.467145	5	-	-		-	-	-	-	ENSMUST00000171419	23	23
chr5:143668400..143668405,-	143668403	p1@Actb	[Actb]	Actb			Actb	968.553	4693.01	20683.2	1889.45	3698.63	15949.4			425.88	819.834	6153.32	559.639	1478.27	6615.28	47882.2	16052.2	63934.5	0.963702	-0.374949	-0.343478	0.393646	0.104431	0.850113	4.71079	4.0317	3.378	3.85301	-1.33279	-0.178697	-0.290662	0.225882	3	ENSMUST00000100497|ENSMUST00000167721|ENSMUST00000163829	80|80|80	80	>1|ACGCGCAGCCACTGTCGAGTCGCGTCCACCCGCGAGCACAGCTTCTTTGCAGCTCCTTCGTTGCCGGTCCACACCCGCCACCAGTTCGCC|>2|ACGCGCAGCCACTGTCGAGTCGCGTCCACCCGCGAGCACAGCTTCTTTGCAGCTCCTTCGTTGCCGGTCCACACCCGCCACCAGTTCGCC|>3|ACGCGCAGCCACTGTCGAGTCGCGTCCACCCGCGAGCACAGCTTCTTTGCAGCTCCTTCGTTGCCGGTCCACACCCGCCACCAGTTCGCC|	-	||	143665476|143665476|143666350	-	-
chr3:32607592..32607660,+	32607617	p1@Actl6a	[Actl6a]	Actl6a			Actl6a	99.0565	910.092	5835.11	309.837	994.985	2315.85			73.008	371.246	2067.06	140.836	416.948	2172.77	10464.9	5241.87	15706.8	1.64025	-1.33303	0.128594	0.943159	0.0719435	0.167279	6.08231	5.05213	3.41551	4.19587	-2.6668	-0.856256	-0.918543	0.120733	2	-	-		-	-	-	-	ENSMUST00000029214	160	160
chr3:32607667..32607678,+	32607672	p4@Actl6a	[Actl6a]	Actl6a			Actl6a	0	32.8949	314.198	5.5328	46.8841	168			0	20.2281	108.457	0	2.80773	132.88	567.51	264.373	831.883		-0.901219	0.504775		0.291792		9.44126	8.01329	5.15794	8.08946	-4.28331	0.0761646	-0.653894	0.0761646	2	-	-		-	-	-	-	ENSMUST00000029214	105	105
chr3:32607687..32607694,+	32607690	p7@Actl6a	[Actl6a]	Actl6a			Actl6a	5.50314	60.3073	107.725	8.2992	32.9925	102.076			3.042	28.5574	204.154	0	16.8464	127.493	316.903	380.093	696.996		-0.0773408	-0.860407		-0.677116	-0.74427	4.81116	6.04093	3.94551	8.17831	-0.865658	2.13739	-0.274639	-0.705876	2	-	-		-	-	-	-	ENSMUST00000029214	87	87
chr12:81361343..81361358,-	81361349	p1@Actn1	[Actn1]	Actn1			Actn1	119.235	65.7898	314.198	13.832	29.5196	452.962			13.182	13.0888	143.546	3.70622	37.9043	46.6877	995.537	258.115	1253.65	-3.06253	0.527015	-1.14288		-1.61004	1.49885	1.66801	3.52165	5.07466	4.33843	3.40665	0.816781	-0.00842159	-0.939614	1	ENSMUST00000021554	272	272	>1|CACTGAGAGCAGTGTGCGTGGAGATTAGGTCCGAGCGCGCGCCCCAGGAAGGCAGTCCGCGAGCTCCAGCCGCCGCCGGCAGCAGCAGCCTCTGCGAACAGAGCCGCGGCGGAAGCGGGCGCAGGGGAGCGNNNNNNNNNNNNNNNNNNNNNNNNNNNNNNNNNNNNNNNNNNNNNNNNNNNNNNNNNNNNNNNGACACCCTCCCCACACCCGGGCAGCAGCCGCCGTCGCCTGGAGAGAAGGTGGAGGAAGAAATCCAGCTCCTAGCACGCACGCACCATC|	-	-	81269308	-	-
chr12:81361129..81361196,-	81361143	p2@Actn1	[Actn1]	Actn1			Actn1	14.675	145.286	1386.96	60.8608	156.28	306.228			3.042	52.3552	370.028	24.0904	19.6541	378.889	2070.29	848.059	2918.35	2.01562	-2.17741	0.104894	2.79546	0.0340919	-1.39097	6.65827	6.89955	2.91565	4.02037	-3.74263	-2.87918	-1.56259	-0.00948999	2	ENSMUST00000167327	66	66	>1|ACACCCGGGCAGCAGCCGCCGTCGCCTGGAGAGAAGGTGGAGGAAGAAATCCAGCTCCTAGCACGCACGCACCATC|	-	-	81269308	ENSMUST00000021554	66	66
chr7:29747284..29747329,-	29747299	p1@Actn4	[Actn4]	Actn4			Actn4	310.01	833.337	2724.55	118.955	2104.57	6905.02			253.5	280.814	341.319	66.712	92.655	621.305	12996.4	1656.31	14652.7	-1.37817	1.34147	1.33603	-1.91804	0.863229	-1.59448	3.51851	1.29355	6.237	3.41006	2.71849	2.11651	1.23873	-0.16551	2	ENSMUST00000068045|ENSMUST00000127210	98|98	98	>1|TGGGCGGGCTGAAAGCAGCTGAAGCGGCGGCCGAGTCGGAGCCTCCGGCACAGGGGCGGGAGCTGAGGCGGTAGCGGACCGGCTGGCGGGCTAGCGAAAGGCGGCGGA|>2|TGGGCGGGCTGAAAGCAGCTGAAGCGGCGGCCGAGTCGGAGCCTCCGGCACAGGGGCGGGAGCTGAGGCGGTAGCGGACCGGCTGGCGGGCTAGCGAAAGGCGGCGGA|	-	|	29679247|29683638	-	-
chr7:29747255..29747266,-	29747260	p2@Actn4	[Actn4]	Actn4			Actn4	265.985	679.828	1970.47	182.582	1128.69	3449.32			261.612	518.792	609.271	140.836	245.676	680.563	7676.88	2456.75	10133.6	-0.541562	0.807614	0.730988	-0.891051	0.15952	-1.07685	3.3143	2.10623	4.64431	2.71303	1.33001	0.606799	0.706914	-0.380929	2	ENSMUST00000068045|ENSMUST00000127210	59|59	59	>1|AGCCTCCGGCACAGGGGCGGGAGCTGAGGCGGTAGCGGACCGGCTGGCGGGCTAGCGAAAGGCGGCGGA|>2|AGCCTCCGGCACAGGGGCGGGAGCTGAGGCGGTAGCGGACCGGCTGGCGGGCTAGCGAAAGGCGGCGGA|	-	|	29679247|29683638	-	-
chr12:72038852..72038926,+	72038889	p1@Actr10	[Actr10]	Actr10			Actr10	71.5408	200.111	489.251	33.1968	78.1402	276.456			19.266	340.309	111.647	46.3277	161.444	260.374	1148.7	939.367	2088.06	-1.0962	-0.822393	-1.35106	1.24434	1.21797	-1.07346	3.25942	4.51668	3.39753	3.17289	0.138105	-1.34379	-0.971515	-0.00943625	1	ENSMUST00000021479	52	52	>1|NNNNNNNNNNNNNNNNNNNNNNNNNNNNACCACTTCACCCTCTCTACGTCGGTCTCTCAAAG|	-	-	72038941	-	-
chr19:46470212..46470246,-	46470230	p1@Actr1a	[Actr1a]	Actr1a			Actr1a	106.394	246.712	2105.13	63.6272	263.94	1714.03			19.266	78.5327	389.168	1.85311	120.732	355.545	4499.83	965.097	5464.92	-0.737173	-0.29644	0.0971935		-0.130187	0.617252	4.45984	4.56603	4.9473	7.6626	0.48746	3.09657	-0.267866	-0.0263921	1	ENSMUST00000040270	64	64	>1|GCGCATGCGTGTCAGTGGCGTTTGCTGCGGACCGGGCTGGCAGTTCCTTCCTCGGAGGGAAAGATTCCTCTGCC|	-	-	46452856	-	-
chr1:36766749..36766823,-	36766783	p1@Actr1b	[Actr1b]	Actr1b			Actr1b	121.069	1381.59	794.472	226.845	1423.89	1269.57			106.47	535.451	309.42	53.7402	290.6	378.889	5217.43	1674.57	6892	0.903106	0.675932	0.0434943	-0.979772	0.291779	-0.880586	4.1622	2.98238	3.56677	3.6267	-0.595427	0.644324	0.34622	-0.395272	2	ENSMUST00000043951	86	86	>1|GTCTGGAGTCGCATCCGTCCAGGTCTCCCCGCGAACCTTGTAGCCCGCCGGTCCTCCTGCAGCCCGCCTGCTGGGCAGGGCCGGCTCGGCCGGGCC|	-	-	36756920	-	-
chr11:20012879..20012928,-	20012889	p1@Actr2	[Actr2]	Actr2			Actr2	77.044	794.96	3999.29	232.378	1363.11	2322.23			42.588	535.451	1218.54	68.5651	487.141	1590.97	8789.02	3943.26	12732.3	1.58649	-0.784104	0.777571	0.68067	0.384615	-0.136281	5.9503	5.34762	3.98435	4.91152	-1.96595	-0.436102	-0.314256	0.256787	1	ENSMUST00000000137	35	35	>1|AGGAGGAAGCAGGCCAGGCCGGGCGGCGGCTCACCAGGACGAACC|	-	-	19964691	-	-
chr1:127332051..127332109,-	127332060	p1@Actr3	[Actr3]	Actr3			Actr3	69.7064	753.842	2760.45	94.0576	585.183	1473.72			32.448	141.597	1891.61	16.678	199.349	716.476	5736.97	2998.16	8735.12	0.42959	-0.905213	-0.365098	-0.93963	-1.4	0.492033	5.64569	5.94778	4.44489	5.73723	-1.2008	-0.210551	-0.735114	-1.147	6	ENSMUST00000178474|ENSMUST00000191004|ENSMUST00000185280	156|253|239	216	>1|CCGACTGCTCACTCGCTCCTGCTCGGGCTTCCCACAGNNNNNNNNNNNNNNNNNNNNNNNNNGACCGAGGGCGGCCCGGGCCGGTGCATGGTCAGCCAGCTCCCATCTCTAGCTCCCCGGCCTCTCAGCAGCACGGAACGGACGGCAGCGGCGGGCGAGGAGGAAG|>2|CCGACTGCTCACTCGCTCCTGCTCGGGCTTCCCACAGNNNNNNNNNNNNNNNNNNNNNNNNNGACCGAGGGCGGCCCGGGCCGGTGCATGGTCAGCCAGCTCCCATCTCTAGCTCCCCGGCCTCTCAGCAGCACGGAACGGACGGCAGCGGCGGGCGAGGAGGAAGATGGCGGGACGGCTGCCGGCCTGTGTGGTGGACTGTGGCACGGGGTATTGCCATTAAAGA…	InrAC|InrAC|InrAC	||	127290571|127303868|127303934	-	-
chr1:127332112..127332134,-	127332123	p2@Actr3	[Actr3]	Actr3			Actr3	1.83438	52.0836	314.198	5.5328	34.729	138.228			13.182	21.418	328.56	0	12.6348	127.493	546.606	503.288	1049.89		-1.18171	-0.577851		-1.36228	-0.738726	7.29574	4.67897	4.84561	8.13574	-2.45013	3.45677	-1.04224	-1.3707	6	ENSMUST00000178474|ENSMUST00000191004|ENSMUST00000185280	219|316|302	279	>1|NNNNNNNNNNNNNNACAGCCAGCCTGCCGGCCGGCCAGCCTGCTGGGCTTGCGGAAGTACTAGCCGACTGCTCACTCGCTCCTGCTCGGGCTTCCCACAGNNNNNNNNNNNNNNNNNNNNNNNNNGACCGAGGGCGGCCCGGGCCGGTGCATGGTCAGCCAGCTCCCATCTCTAGCTCCCCGGCCTCTCAGCAGCACGGAACGGACGGCAGCGGCGGGCGAGGAGGAAG|>2|NNNNNNNNNNNNNNACAGCCAGCCTGCCGGCCGGCCAGCCTGCTGGGCTTGCGGAAGTACTAGCCGACTGCTCACTCGCTCCTGCTCGGGCTTCCCACAGNNNNNNNNNNNNNNNNNNNNNNNNNGACCGAGGGCGGCCCGGGCCGGTGCATGGTCAGCCAGC…	-	||	127290571|127303868|127303934	-	-
chr1:127332271..127332287,-	127332279	p5@Actr3	[Actr3]	Actr3			Actr3	9.1719	156.251	139.145	11.0656	156.28	197.772			4.056	29.7473	31.899	3.70622	35.0966	17.9568	669.686	122.462	792.148		0.505721	0.000271722		-0.811797	0.234935	4.93515	3.76983	4.93809	3.67038	0.00294235	-0.0994456	0.261209	-0.209362	3	ENSMUST00000027579|ENSMUST00000188497|ENSMUST00000187460	183|183|180	182	>1|CCTGGGGCCTGGCCTGGCCGGGGCGTCGGCAGCGGCGGCCATCTTGGCTCCCCGCNNNNNNNNNNNNNNNNNNNNNNNNNNNNNNNNNNGACCGAGGGCGGCCCGGGCCGGTGCATGGTCAGCCAGCTCCCATCTCTAGCTCCCCGGCCTCTCAGCAGCACGGAACGGACGGCAGCGGCGGGCGAGGAGGAAG|>2|CCTGGGGCCTGGCCTGGCCGGGGCGTCGGCAGCGGCGGCCATCTTGGCTCCCCGCNNNNNNNNNNNNNNNNNNNNNNNNNNNNNNNNNNGACCGAGGGCGGCCCGGGCCGGTGCATGGTCAGCCAGCTCCCATCTCTAGCTCCCCGGCCTCTCAGCAGCACGGAACGGACGGCAGCGGCGGGCGAGGAGGAAG|>3|CC…	-	||	127290571|127302456|127303925	-	-
chr10:89194998..89195069,-	89195025	p1@Actr6	[Actr6]	Actr6			Actr6	18.3438	145.286	435.389	69.16	171.908	295.595			15.21	145.167	159.495	16.678	138.983	235.234	1135.68	710.766	1846.45	1.88624	-0.557899	0.241979	0.128878	0.559134	-0.0625853	4.94681	4.27982	2.74812	4.44717	-2.19869	0.167349	-0.158443	0.288878	1	ENSMUST00000020109	40	40	>1|AGATTCAAACAGTGGGAAAGCGACTCCGCTGCAGCGTGGTGCGTGCCGAA|	-	-	89175175	-	-
chr14:30791559..30791604,+	30791591	p1@Actr8	[Actr8]	Actr8			Actr8	73.3752	315.243	1252.3	141.086	682.424	1350.38			174.408	158.255	430.636	50.034	147.406	685.95	3814.81	1646.69	5461.5	0.938521	0.10874	1.11298	-1.79127	0.67101	-0.102128	4.40773	1.75263	3.84407	4.04447	-0.563663	2.29184	0.405666	0.210671	1	ENSMUST00000016115	60	60	>1|GTTCTCCTCTGACTGCTGTGGCGTCGGTGTCCCAGAGCCCCGGGGCTGGTGGTGGTCCACGGTGGCAGAG|	-	-	30791651	-	-
chr14:30791532..30791543,+	30791537	p3@Actr8	[Actr8]	Actr8			Actr8	12.8407	41.1186	62.8396	94.0576	220.529	93.5697			18.252	35.6967	6.3798	27.7966	37.9043	52.0747	524.955	178.104	703.059	2.82536	0.570622	2.40893	0.593587	2.93393	0.0854107	2.96902	1.18301	1.73425	1.67695	-1.23478	0.49394	1.8007	0.959334	1	ENSMUST00000016115	114	114	>1|CGGTGGCGGCCATTTTGACTGTGGGCAGCCAGGGGACGCCGCGCCTGCGCAATGGTTCTCCTCTGACTGCTGTGGCGTCGGTGTCCCAGAGCCCCGGGGCTGGTGGTGGTCCACGGTGGCAGAG|	-	-	30791651	-	-
chr12:86621311..86621385,-	86621357	p1@Acyp1	[Acyp1]	Acyp1			Acyp1	66.0377	707.24	130.168	113.422	777.929	180.76			102.414	566.388	89.3172	48.1809	297.619	95.171	1975.56	1199.09	3174.65	0.775808	0.472154	0.137345	-1.08001	0.0910906	-0.927174	3.65455	2.67271	3.07376	3.01417	-0.580786	0.341461	0.246818	-0.781056	3	ENSMUST00000008966|ENSMUST00000065913	107|107	107	>1|GTGGCGGTTAACACGGCTCGGGCGGTTGATCTGAAGGTCTTCGGGGCTGTTCAGCGGCTCCTGGGGAAGCCCCAGAAACTCGAGCTTCCGCCGCTCGGATCATCCAAGTGTTTGAGC|>2|GTGGCGGTTAACACGGCTCGGGCGGTTGATCTGAAGGTCTTCGGGGCTGTTCAGCGGCTCCTGGGGAAGCCCCAGAAACTCGAGCTTCCGCCGCTCGGATCATCCAAGTGTTTGAGC|	-	|	86613561|86619846	-	-
chr11:30549417..30549445,-	30549422	p2@Acyp2	[Acyp2]	Acyp2			Acyp2	5.50314	164.475	67.3282	30.4304	83.3495	21.2658			0	135.647	12.7596	18.5311	80.0203	35.9136	372.352	282.872	655.224	2.36524	-1.63982	-0.976369		1.45744	-0.757747	5.27414	8.21827	1.76488	2.61308	-3.50927	-5.60519	-0.811004	-0.141827	1	-	-		-	-	-	-	ENSMUST00000074613	44	44
chr2:163575905..163575919,-	163575912	p1@Ada	[Ada]	Ada			Ada	1.83438	16.4475	152.61	13.832	78.1402	250.937			8.112	26.1776	245.622	3.70622	73.0009	149.041	513.801	505.66	1019.46		0.715623	2.2142		-0.71883	1.46213	6.1826	4.9827	4.5233	5.72541	-1.65929	0.742708	1.00263	-0.309639	1	ENSMUST00000017841	86	86	>1|CGCGGTCTCTGAGAGCCATCGGGAAGCGACCCTGCCAGCGAGCCAACGCAGACCCAGAGAGCTTCGGCGGAGAGAACCGGGAACACGCTCGGAACC|	-	-	163553295	-	-
chr2:163575943..163575969,-	163575959	p2@Ada	[Ada]	Ada			Ada	23.8469	137.062	287.267	33.1968	197.955	489.114			34.476	180.863	414.687	27.7966	162.848	481.242	1168.44	1301.91	2470.36	0.468871	0.766746	0.528729	-0.305734	0.2145	-0.150932	4.12507	4.091	4.35082	4.50968	0.225752	0.418683	0.683858	0.0927356	1	ENSMUST00000017841	133	133	>1|GGGCGGGGCTGTGCCGGGGCAGCCCGGTAAAAAAGAGCGTGGCGGGCCGCGGTCTCTGAGAGCCATCGGGAAGCGACCCTGCCAGCGAGCCAACGCAGACCCAGAGAGCTTCGGCGGAGAGAACCGGGAACACGCTCGGAACC|	-	-	163553295	-	-
chr2:120966143..120966197,+	120966165	p1@Adal	[Adal]	Adal			Adal	9.1719	156.251	224.427	22.1312	72.9308	82.9368			10.14	65.444	9.5697	1.85311	33.6927	50.279	567.849	170.979	738.827	1.22644	-1.4307	-1.09402		2.33421	-0.94755	5.30052	2.82724	2.78856	5.16583	-2.51197	2.33859	-1.12885	0.0112618	4	ENSMUST00000028702|ENSMUST00000110665|ENSMUST00000119031|ENSMUST00000110662	458|472|331|604	466.25	>1|GCGCGCGCACGTAATAGCCGCGGTGGATAAGCGGCGTGCGCCGCACGGGTCCCGGGACCAGCAGCGCCGCAAAGGGGTCGCGCACGTATCCGTGTGCGGCAAGCGATCGTTTGCTGAGGGAGCTGCTGTCGTTGGTGCTCTGGACCGTTCCCGCCCGGCGCTGGCGGCCTCGCGGGCCCATGACGAGAAGGTGCTCAGCAATACTGCACACAGAACACTTACCGAGCTCCCGCTCATCCGCTTCTGGGTGAAAGTGATCCCAGAGCCACACATAGTGCAAGTCTTGTTTAAAATGGCAATCTGAAGGAAGTCCAGCACCTCAGAGATTCCCACTTTGATAAGTTTATCGTCCAAGCCGAGAATAAGAGCAAAGAGAAACTTTTCCTTCTACTGAAG…	-	|||	120968894|120975962|120967979|120975962	-	-
chr9:70526828..70526923,+	70526845	p1@Adam10	[Adam10]	Adam10			Adam10	20.1782	246.712	924.64	2.7664	182.327	631.595			19.266	102.331	76.5576	11.1187	36.5005	95.171	2008.22	340.944	2349.16		-0.549529	-0.435268	-0.766577	0.312145	-1.47465	5.82454	3.18199	7.96193	3.5079	2.13739	0.325904	-0.544679	-0.471319	2	ENSMUST00000067880|ENSMUST00000144537	166|166	166	>1|NNNNNNCCCTGTTTTGGCGGAGCAGGGCGCGCGGCTGGGCCCCTGAAGTGGAGCGAGAGGGAGGCGCTTCGCCGGGTGCCACTGCCGGGGAGGCTCGTCGGGACCCAGCGCCGGTCGCGGCTCCCTCAGGATCGATGCACCGCGGTTAACCCGTGAGGAGGCGGCGGCCGGGGAAG|>2|NNNNNNCCCTGTTTTGGCGGAGCAGGGCGCGCGGCTGGGCCCCTGAAGTGGAGCGAGAGGGAGGCGCTTCGCCGGGTGCCACTGCCGGGGAGGCTCGTCGGGACCCAGCGCCGGTCGCGGCTCCCTCAGGATCGATGCACCGCGGTTAACCCGTGAGGAGGCGGCGGCCGGGGAAG|	-	|	70527011|70527011	-	-
chr7:141416788..141416819,-	141416812	p3@Adam12	[Adam12]	Adam12			Adam12	18.3438	41.1186	71.8167	11.0656	36.4654	97.8229			27.378	98.7609	118.026	35.2091	61.77	82.6013	276.633	423.746	700.379	-0.70425	0.443198	-0.171054	0.357164	-0.512265	-0.672687	2.58971	2.9624	3.54278	2.02041	0.953075	-0.941995	0.146402	-0.442168	3	ENSMUST00000067680	253	253	>1|CGGACAGGCTGCTCATTTATTGCAACGGTCAAGGGCGGCTCGTGCCAGAGTAGCGCGCGCGCGCACGCACACACACGGGGAGGGGAGAAAGTTTTTTTTTGAAAAAATGAAAGGCTAGACTCGCTGCTCAGCGACCCGGGCGCTGCGCGAGGGGGTCGCGGCAGACTCAGGGCAGTAGGACTTCCCCCAGCTCGGCGCCCGCGTGGGATGCTGCAGCGCTGGCCGCGGGGCCCCCGAAGCAGCTGCACGCCAGGCCGGCGACA|	-	-	141079624	-	-
chr3:89153890..89153923,-	89153910	p1@Adam15	[Adam15]	Adam15			Adam15	36.6876	158.992	520.671	38.7296	116.342	727.292			10.14	39.2664	223.293	0	113.713	39.505	1598.71	425.917	2024.63	0.0771211	0.481769	-0.448925		-2.48391	1.52211	4.19299	4.62782	4.42746	8.26414	0.23447	3.63632	0.300517	-0.829669	4	ENSMUST00000107448|ENSMUST00000029676|ENSMUST00000107446|ENSMUST00000074582	102|102|102|102	102	>1|NNNNNNNNCTAGTTGCTGCGCTGCACCGAGCTGGTGTCCGGCGGGGCCGTGGCTGCTCCTCCACGCGTAGCCCCGCACCTGCTGCCCCAGTCCAGCCCGGAGCTCCGCGGCC|>2|NNNNNNNNCTAGTTGCTGCGCTGCACCGAGCTGGTGTCCGGCGGGGCCGTGGCTGCTCCTCCACGCGTAGCCCCGCACCTGCTGCCCCAGTCCAGCCCGGAGCTCCGCGGCC|>3|NNNNNNNNCTAGTTGCTGCGCTGCACCGAGCTGGTGTCCGGCGGGGCCGTGGCTGCTCCTCCACGCGTAGCCCCGCACCTGCTGCCCCAGTCCAGCCCGGAGCTCCGCGGCC|>4|NNNNNNNNCTAGTTGCTGCGCTGCACCGAGCTGGTGTCCGGCGGGGCC…	-	|||	89143832|89143832|89143832|89143832	-	-
chr12:21379387..21379407,-	21379398	p1@Adam17	[Adam17]	Adam17			Adam17	12.8407	120.615	399.48	44.2624	140.652	236.051			27.378	26.1776	114.836	0	18.2502	43.0963	953.901	229.739	1183.64	1.74646	-0.757779	0.220879	-5.80106	-1.40357	-0.508719	5.28626	2.34375	3.07498	6.95062	-2.21128	4.60688	-0.3399	-1.44934	2	ENSMUST00000101551|ENSMUST00000064536	106|106	106	>1|CGCGGGAGGGAGAAGTTTGCAGGGCCGTGCTGGGAAGATCACCTCCGCTCCCAATGTGAGCAGTTTCCCGAACGCTCTTTCGGAGAAGGTTTCCCAGAGAGGTGGTGGACGGGAAC|>2|CGCGGGAGGGAGAAGTTTGCAGGGCCGTGCTGGGAAGATCACCTCCGCTCCCAATGTGAGCAGTTTCCCGAACGCTCTTTCGGAGAAGGTTTCCCAGAGAGGTGGTGGACGGGAAC|	-	|	21331136|21331136	-	-
chr12:21379411..21379453,-	21379431	p2@Adam17	[Adam17]	Adam17			Adam17	20.1782	148.027	525.16	19.3648	142.389	161.62			14.196	16.6585	66.9879	7.41244	51.943	66.4402	1016.74	223.638	1240.38	-0.0578949	-1.69706	-0.0558337		-0.0117568	1.61183	5.0259	2.51748	3.9382	3.90928	-1.0877	1.3918	-1.09922	0.360919	2	ENSMUST00000101551|ENSMUST00000064536	139|139	139	>1|CCGGGGACGTGAGCCTAGCTTCCCTGTAGGCGGCGCGGGAGGGAGAAGTTTGCAGGGCCGTGCTGGGAAGATCACCTCCGCTCCCAATGTGAGCAGTTTCCCGAACGCTCTTTCGGAGAAGGTTTCCCAGAGAGGTGGTGGACGGGAAC|>2|CCGGGGACGTGAGCCTAGCTTCCCTGTAGGCGGCGCGGGAGGGAGAAGTTTGCAGGGCCGTGCTGGGAAGATCACCTCCGCTCCCAATGTGAGCAGTTTCCCGAACGCTCTTTCGGAGAAGGTTTCCCAGAGAGGTGGTGGACGGGAAC|	-	|	21331136|21331136	-	-
chr11:45869475..45869570,+	45869563	p1@Adam19	[Adam19]	Adam19			Adam19	14.675	52.0836	157.099	2.7664	57.3028	27.6456			3.042	101.141	66.9879	0	40.7121	44.892	311.572	256.775	568.347		-2.48528	0.136526		-0.572191	-1.30234	3.78844	5.57314	4.70928	7.42801	0.920844	1.85487	-1.34671	-0.995489	1	ENSMUST00000011400	52	52	>1|GGCCGGGGGCAGGCAATGGCAGGGGATGTGTGATTGCGGACAGTGAGAGGGCCGTTGCTATC|	-	-	45869615	-	-
chr8:26127215..26127349,-	26127316	p1@Adam9	[Adam9]	Adam9			Adam9	42.1907	441.34	1835.81	124.488	529.617	1371.65			10.14	101.141	220.103	14.8249	129.155	714.681	4345.1	1190.04	5535.14	1.54979	-0.420378	0.262786		1.69685	0.351206	5.73748	4.91834	3.92748	5.78387	-1.81001	0.865528	-0.195215	1.37225	2	ENSMUST00000084035|ENSMUST00000084032	64|64	64	>1|NNNNNNTTGCAAGGATGACCGAAGGGGCGGAGGCGGCGGCCGCGCGTTGAGCGGAACCTGCCGAAGCCCTCGCT|>2|NNNNNNTTGCAAGGATGACCGAAGGGGCGGAGGCGGCGGCCGCGCGTTGAGCGGAACCTGCCGAAGCCCTCGCT|	-	|	26061388|26061401	-	-
chr16:85803351..85803366,-	85803357	p1@Adamts1	[Adamts1]	Adamts1			Adamts1	53.197	98.6847	300.732	22.1312	59.0392	272.203			24.336	46.4057	60.6081	12.9718	57.5584	125.698	805.987	327.578	1133.56	-1.24653	-0.143548	-0.736277	-0.882494	1.04625	0.307742	2.89679	2.11402	3.87368	3.76978	0.976889	1.65576	-0.356642	0.577305	1	ENSMUST00000023610	403	403	>1|CCTGGTCCTTGCACTCGCTAGAAAGCAGCTCCGAGCTAGGTGCTATCGCAAGGCCAGAGCGCACAGCCCGGCGGAGAGAGCAGATCCTTGCTCAGATCGAGTCAAATCGGGGCCAAGGCGGAGGACGAAGAGTCCAGGCTCCTATTCTGGACTTGTTCCCCAGCTCCGGGGGCGCTTCTAGGTCCTGCAGCAGCCAGCAGTGCGGAGCCACCAACTCGGTGCTGGAATGAAAAAATTCCCGCGCGCCAGTGCAGAATCTTTCTAAGTGACCCGGAGCTTCGGGTGCTAGCTCTGCACGAACTTTCCCATCAAAGTGATCGTGAATTTTAAGCATCAGGAGCAGGCCAGCGAAGCTCTACGCGTCTAAACGTCTATCCAGACCAAGAGTTCTCTGCG…	-	-	85795645	-	-
chr3:89518938..89519006,+	89518971	p1@Adar	[Adar]	Adar			Adar	16.5094	10.965	116.702	27.664	81.6131	329.62			9.126	28.5574	60.6081	9.26555	46.3275	102.354	583.074	256.238	839.312	0.727518	1.49399	2.84038		0.751159	0.688453	2.91362	3.21954	3.86979	3.93322	0.956167	0.713677	1.6027	0.681541	1	ENSMUST00000098924	817	817	>1|CGCCCTAACCATTGATTCCTGACTGAAGGTGGAAGACTACGCGTTGGGACTAGCCGGGAAGGGCGCAGCCTTGGGCTCACGAGTGGGCAGCGTCCGAGGAATCGCGCGCGGGGGTGTTCCCTCACCAGACACAGTCGTACTTGGACCCTAGTCATGAGCATAGCAAGTGGAGATACCCGCAGCCACAGGGGCCGGAGTCTTACCCTAGGAGTTTCCAGCTTCAGCAGATAGAGTTTCTCAAAGGGCGGCTCCCAGAAGCACCCTTGATTGGAATACAAACCCAGTCACTGCCGCCATTCCTCCCAGGACACTGGCCAAGATTCCCAGGGCCACCTGCCCAAGACAGGCAACTGGAAATCTGGGAGTTCCCCAGGAGTGTGACTCTCAGAAATCAGG…	-	-	89539479	-	-
chr8:114516158..114516195,-	114516170	p1@Adat1	[Adat1]	Adat1			Adat1	42.1907	74.0135	134.656	35.9632	121.551	265.823			26.364	27.3675	38.2788	38.9153	49.1352	61.0531	674.198	241.114	915.312	-0.227482	0.978548	0.711914	0.553082	0.666564	0.832783	2.29268	1.29999	3.41108	1.48968	1.1184	0.18969	0.753753	0.69346	2	ENSMUST00000034427|ENSMUST00000139820	130|130	130	>1|TGCGCAACCTGGTTAAACGAGCGTGGCGGTAGAGGGGCATCGCGTGGAGGTTGCGGCGCGTGGATAATAGGGTGTGAGGGACTCCGGATCGGCGTCTCGGGATTTGGCTTTCTATAGTGGCCTCAGCTCCAGCTCCACCT|>2|TGCGCAACCTGGTTAAACGAGCGTGGCGGTAGAGGGGCATCGCGTGGAGGTTGCGGCGCGTGGATAATAGGGTGTGAGGGACTCCGGATCGGCGTCTCGGGATTTGGCTTTCTATAGTGGCCTCAGCTCCAGCTCCACCT|	-	|	114492305|114496000	-	-
chr10:13272993..13273045,+	13273025	p1@Adat2	[Adat2]	Adat2			Adat2	453.092	3533.46	1948.03	1305.74	7626.48	2047.9			341.718	3306.7	679.449	1373.15	3513.87	1050.47	16914.7	10265.4	27180.1	1.52595	0.072113	1.10983	2.00503	0.628228	0.0876545	3.59523	3.54219	2.88882	1.73255	-0.70641	-1.80964	0.88762	0.456153	1	-	-		-	-	-	-	ENSMUST00000019944	46	46
chr10:13273051..13273064,+	13273058	p2@Adat2	[Adat2]	Adat2			Adat2	181.604	1318.54	848.335	971.006	3568.4	1046.28			165.282	1494.5	318.99	841.312	1928.91	497.403	7934.16	5246.4	13180.6	2.41546	0.302402	1.43599	2.34421	0.640095	0.368012	3.57312	3.45181	2.24809	1.52749	-1.32502	-1.92432	1.24983	0.723492	1	-	-		-	-	-	-	ENSMUST00000019944	13	13
chr10:80065610..80065649,+	80065636	p1@Adat3,p1@Scamp4	[Adat3, Scamp4]	Adat3, Scamp4	Adat3		Adat3	62.3689	131.58	116.702	19.3648	144.125	486.988			34.476	107.09	252.002	16.678	146.002	211.89	961.128	768.138	1729.27	-1.66213	2.05637	0.130911	-1.0258	-0.249578	0.445374	1.98446	3.36192	4.99075	4.38291	3.00629	1.02098	1.06499	-0.0712851	2	ENSMUST00000038411|ENSMUST00000079883	74|99	86.5	>1|GGTGGCAGGCGTGGCGGCCCGGTTGCTAGGACTTGGATAAGCGTGGCGTTCGCTCGGGTGTCCCTCAGTCGAGCCCCGTTGAGG|>2|GGTGGCAGGCGTGGCGGCCCGGTTGCTAGGACTTGGATAAGCGTGGCGTTCGCTCGGGTGTCCCTCAGGTGGCCCCTTCTGCCTGGGTGCCAGGTCAGCTGATACAGAA|	-	|	80069074|80071588	-	-
chr15:76406816..76406887,+	76406832	p1@Adck5	[Adck5]	Adck5			Adck5	20.1782	54.8248	193.007	41.496	78.1402	257.317			10.14	23.7978	66.9879	16.678	60.3662	159.816	644.963	337.785	982.749	1.02214	0.413957	0.507339	0.691063	1.24821	1.32481	3.58609	3.10089	2.99995	3.68333	-0.586138	0.582443	0.491318	1.22665	2	ENSMUST00000162503|ENSMUST00000160784	80|80	80	>1|GTGCGCAAGCGCATTGCCTACTCTTTCGCGGGGTCGTCTGGGCACCAGGGACGTCTGCGGCGAAACCGGGAAGAGAGCACTGCCGGGGAC|>2|GTGCGCAAGCGCATTGCCTACTCTTTCGCGGGGTCGTCTGGGCACCAGGGACGTCTGCGGCGAAACCGGGAAGAGAGCACTGCCGGGGAC|	-	|	76406912|76406912	-	-
chr5:34916457..34916524,+	34916497	p1@Add1	[Add1]	Add1			Add1	9.1719	164.475	628.396	52.5616	142.389	399.798			3.042	69.0136	232.863	1.85311	57.5584	242.417	1396.79	606.747	2003.54	2.4558	-0.651748	-0.207351		0.0578883	-0.25979	6.35805	6.41564	3.35438	6.99653	-3.00367	0.580897	-0.431087	-0.0146704	5	ENSMUST00000147574|ENSMUST00000146295|ENSMUST00000001108|ENSMUST00000114340	364|263|85|85	199.25	>1|AGCGCGAGCCGCAGGCGAGGCGGCGGCCGCACTCGGACCCGGGAAGCCGTGCTCTCTCCCCGATTCTCCGCGGAGGTATTACTTGGACTTTAATCTGCTGGCCCCATTTACGGAACTACCAGCCCCTGGAGGTTACNNNNNNNNNNNNNNNNNNNNNNNNNNNNNNNNNNNNNNNNNNNNNNNNNNNNNNNNNNNNNNNNNNNNNNNNNNNNNNNNNNNNNNNNNNNNNNNNNNNNNNNNNNNNNNNNNNNNNNNNNNNNNNNNNNNNNNNNNNNNNNNNNNNNNNNNNNNNNNNNNNNNNNNNNNNNNNNNNNNNNNNNNNNNNNNNNNNNNNNNTGAAGACCTTTTACTAAGGACCCTAGGAAAATTGTGCA|>2|AGCGCGAGCCGCAGGCGA…	-	|||	34943992|34943992|34943992|34943992	ENSMUST00000114338	85	85
chr3:138106049..138106140,+	138106073	p1@Adh5	[Adh5]	Adh5			Adh5	104.56	493.424	3164.42	257.275	505.306	2181.88			60.84	297.473	2928.33	88.9493	714.567	2542.68	6706.86	6632.84	13339.7	1.2949	-0.536271	0.0342975	0.544242	-0.203688	1.2629	5.12191	5.71691	3.38218	5.18666	-1.73973	-0.530247	-0.353601	0.0259056	1	ENSMUST00000005964	72	72	>1|CCCTCCCCTCACGCACGGTCCAGCCCTCACCCGGGTTCCGCTACACTCGTGAACCTTAGCGCTCGATCCCGAACTAGCGGCC|	-	-	138106145	-	-
chr3:137880778..137880792,+	137880784	p1@Adh7	[Adh7]	Adh7			Adh7	14.675	49.3424	197.496	55.328	145.862	304.102			6.084	47.5956	488.055	22.2373	133.367	405.824	766.804	1103.16	1869.97	1.87929	0.621452	1.55409	1.78803	-0.265891	1.47682	4.02671	6.34753	3.01235	4.569	-1.01437	-1.77853	0.948902	0.0514692	1	ENSMUST00000090171	70	70	>1|GCTGGTACCCATAGAAGAGTGAACCGTGCCTCAGTCAGAAGACGTTCCTGTTTGCAGGCCACACACCCAGGAGAGGCAGG|	-	-	137880854	-	-
chr3:137880753..137880767,+	137880758	p2@Adh7	[Adh7]	Adh7			Adh7	1.83438	35.6361	134.656	66.3936	88.5589	259.443			3.042	48.7855	111.647	12.9718	51.943	271.148	586.523	499.536	1086.06	4.84076	0.943568	1.30132		1.27635	0.0895864	6.19306	5.50574	2.38123	4.58616	-3.81183	-0.919584	1.26509	1.03741	1	ENSMUST00000090171	96	96	>1|CACGCTATTTATTGAAGGCCGAAGATGCTGGTACCCATAGAAGAGTGAACCGTGCCTCAGTCAGAAGACGTTCCTGTTTGCAGGCCACACACCCAGGAGAGGCAGG|	-	-	137880854	-	-
chr12:29360085..29360104,+	29360095	p1@Adi1	[Adi1]	Adi1			Adi1	78.8783	1313.05	668.793	431.558	1436.04	852.76			23.322	431.93	484.865	137.13	728.605	852.948	4781.09	2658.8	7439.89	2.44441	0.350348	0.129124	2.53043	0.814234	0.753661	4.64232	5.26702	2.40561	3.52293	-2.23671	-1.74409	0.40056	0.870044	1	ENSMUST00000020957	22	22	>1|CCAGCCAGTTAGTGGAAGCCGCCGCCGCCACC|	-	-	29360117	-	-
chr14:21895391..21895444,+	21895425	p1@Adk	[Adk]	Adk			Adk	119.235	331.69	1822.35	49.7952	828.286	1580.05			158.184	414.082	695.398	59.2995	310.254	834.991	4731.41	2472.21	7203.62	-1.25135	-0.205766	1.31899	-1.40795	0.263748	-0.415884	4.16947	2.8063	5.58177	4.26001	1.41231	1.4537	0.112768	-0.0736546	1	-	-		-	-	-	-	-	-
chr14:21871816..21871855,+	21871838	p2@Adk	[Adk]	Adk			Adk	293.501	904.61	3159.93	91.2912	397.647	657.115			81.12	359.347	430.636	83.3899	265.33	515.36	5504.1	1735.18	7239.28	-1.67939	-2.26481	-1.18479	0.0395752	0.258835	-0.436877	3.78938	3.27574	3.5231	3.2191	-0.266279	-0.0566358	-1.92654	-0.0116715	1	ENSMUST00000045376	22	22	>1|CGGCAGAGCCAAACTACGGTGAGAGTGTGAAG|	Inr	-	21871860	-	-
chr14:21871799..21871811,+	21871805	p4@Adk	[Adk]	Adk			Adk	33.0188	76.7548	399.48	8.2992	50.357	127.595			11.154	47.5956	44.6586	18.5311	5.61546	55.6661	695.505	183.221	878.726	-1.92953	-1.64271	-0.603178	0.707534	0.314698	-2.97537	3.83014	2.99259	4.34202	1.69882	0.511876	-1.29377	-1.44868	-0.371611	1	ENSMUST00000045376	55	55	>1|GGGCGGGGCCACCGGACTGAGGGGCGGGACGCGCGGCAGAGCCAAACTACGGTGAGAGTGTGAAG|	-	-	21871860	-	-
chr15:89153400..89153417,+	89153410	p1@Adm2	[Adm2]	Adm2			Adm2	0	0	4.48854	63.6272	29.5196	338.127			0	0	41.4687	3.70622	36.5005	75.4186	435.762	157.094	592.856	7.00286	6.08493	5.90783		0.855139	6.20947		6.39124	2.52127	4.74022		-1.65102	6.43551	1.4683	1	ENSMUST00000066991	165	165	>1|TTCCCAAACTGGTTTTCCGCTGGACCCCAGAAGGCTCTCTTTCCTAGGAGACCACGACCTGACCCACAAGTTCCGTTGCGTGCTCTGGGAACTGCTAGCAGATCCCAGCTTTGCCAGCTGTCTCCAGATCCTGAGACCTGTGCCCCGACAGACAACAGACGCAGCCCAGCCCGCC|	-	-	89153718	-	-
chr15:89153360..89153391,+	89153369	p2@Adm2	[Adm2]	Adm2			Adm2	3.66876	2.74124	8.97709	124.488	27.7832	346.633			4.056	0	3.1899	5.55933	39.3082	138.267	514.291	190.381	704.672	4.90603	5.1949	3.12533		5.23294	6.31499			1.58478	4.87719			4.97428	4.56726	1	ENSMUST00000066991	206	206	>1|CCACGCCTTTAGCTCCAAAGACTACTTAGTGCTGGAAGTGCTTCCCAAACTGGTTTTCCGCTGGACCCCAGAAGGCTCTCTTTCCTAGGAGACCACGACCTGACCCACAAGTTCCGTTGCGTGCTCTGGGAACTGCTAGCAGATCCCAGCTTTGCCAGCTGTCTCCAGATCCTGAGACCTGTGCCCCGACAGACAACAGACGCAGCCCAGCCCGCC|	-	-	89153718	-	-
chr2:168055853..168055886,-	168055861	p1@Adnp,p1@Dpm1	[Adnp, Dpm1]	Adnp, Dpm1	Adnp		Adnp	299.004	1606.37	1642.81	473.054	1222.46	908.051			87.204	721.073	647.55	151.955	620.508	639.262	6151.74	2867.55	9019.3	0.660955	-0.854962	-0.393875	0.797669	-0.0185689	-0.216535	3.43965	3.96447	2.16994	3.04728	-1.26971	-0.917188	-0.446516	-0.0443644	2	ENSMUST00000154111	9	9	>1|CGCCTCTCGCAGAGCCGTC|	-	-	168036031	-	-
chr16:38452692..38452755,-	38452737	p1@Adprh	[Adprh]	Adprh			Adprh	11.0063	38.3774	233.404	30.4304	46.8841	225.418			5.07	26.1776	577.372	0	213.387	511.769	585.52	1333.78	1919.3	1.4266	-0.0501196	0.285472		-0.173849	3.00315	4.56461	6.76085	3.14076	10.5031	-1.42385	3.7423	0.0981547	0.252561	1	ENSMUST00000002923	172	172	>1|CTCCGCCCCTGTTCGGCTTTTGGCTTGGGTGCCCACAGCAGGACTCCTGCGCCCGGTACCCCGCCTCCAGCTCGGGCAATCCTGCCCTCGGCTCTGGACCACCCCGATCCCGCCCCACGCTCTCAGCTCCGCCTCAGCAGGAGTCTCCGTTGCCCCATAAGCCCGCCTGTGCCAAGCTCAGC|	-	-	38445769	-	-
chr4:125998913..125998948,-	125998926	p1@Adprhl2	[Adprhl2]	Adprhl2			Adprhl2	18.3438	65.7898	44.8854	24.8976	130.234	174.38			15.21	29.7473	19.1394	7.41244	18.2502	10.7741	458.53	100.533	559.064	0.430602	1.94606	0.979771		-0.800741	-0.689896	2.56067	1.65244	3.58658	1.89971	1.02591	0.247271	1.34935	-0.806402	1	ENSMUST00000102617	13	13	>1|NNNNNNNNNNNNNNNNNNNNNNN|	-	-	125993816	-	-
chr2:179906294..179906363,+	179906331	p1@Adrm1	[Adrm1]	Adrm1			Adrm1	242.138	616.779	2863.69	486.886	680.688	2507.24			180.492	843.632	6264.96	144.543	1027.63	2391.85	7397.43	10853.1	18250.5	1.00626	-0.191738	0.142129	-0.31945	-1.389	0.28448	3.84261	5.29567	2.70971	4.55944	-1.1329	-0.736231	-0.0186392	-1.03213	1	-	-		-	-	-	-	ENSMUST00000061437	63	63
chr15:80778914..80778979,+	80778948	p1@Adsl	[Adsl]	Adsl			Adsl	18.3438	104.167	520.671	30.4304	170.172	546.532			8.112	54.7349	44.6586	42.6215	46.3275	145.45	1390.32	341.905	1732.22	0.714936	0.0698685	0.705416	2.32399	1.6924	-0.238225	5.05248	3.53597	4.53529	2.15671	-0.517189	-1.37926	0.215985	1.12094	3	ENSMUST00000023043|ENSMUST00000164806|ENSMUST00000168756	29|29|29	29	>1|TGCTGCTGGTGTCCGCCGCGTCCTGGTCGCGTGTTGAAA|>2|TGCTGCTGGTGTCCGCCGCGTCCTGGTCGCGTGTTGAAA|>3|TGCTGCTGGTGTCCGCCGCGTCCTGGTCGCGTGTTGAAA|	-	||	80778977|80778977|80778977	-	-
chr1:179726582..179726645,-	179726620	p1@Adss	[Adss]	Adss			Adss	58.7002	1019.74	3819.75	337.501	1074.86	1722.53			18.252	92.8114	146.735	59.2995	68.7893	231.643	8033.09	617.53	8650.62	2.51335	-1.14872	0.0759101	1.67309	0.656888	-0.42942	6.35326	3.6782	3.04924	2.33123	-3.30402	-1.34697	-0.64375	0.479884	1	ENSMUST00000016105	96	96	>1|CTGGCTCCTTCTTCCTCCGCATGTGGCTGGTGGCGGCGCAGCAGTTGGGTTCACGTTCCGTTCTCCTGCCCCGTCTCCTTAAGGCTCTTCTGCCCTGCCGGGAGCC|	TOP	-	179694375	-	-
chr1:179726545..179726564,-	179726550	p2@Adss	[Adss]	Adss			Adss	12.8407	142.545	359.084	55.328	409.802	289.215			8.112	33.3169	35.0889	22.2373	29.4811	75.4186	1268.81	203.655	1472.47	2.06516	-0.31169	1.52022	1.40064	1.09303	-0.17369	5.23415	3.00021	3.6473	2.21274	-1.58685	-0.787469	0.551696	0.728783	1	ENSMUST00000016105	26	26	>1|CCGTCTCCTTAAGGCTCTTCTGCCCTGCCGGGAGCC|	-	-	179694375	-	-
chr11:5761889..5761969,+	5761959	p1@Aebp1	[Aebp1]	Aebp1			Aebp1	84.3815	74.0135	1728.09	74.6928	111.133	2003.24			60.84	54.7349	1358.9	3.70622	99.6744	1332.39	4075.55	2910.25	6985.8	-0.174855	0.213102	0.583185	-3.86623	-0.0284044	0.85886	4.40849	4.52695	4.81383	8.41186	0.405346	3.88492	0.214563	-0.0383556	1	ENSMUST00000102923	195	195	>1|AGGAGCGCCCAGTTGCTGCCGGAGCTGGGCCCGCCAGAACCTCTCCTGGAGCCCCTTGCTCTCCTTGAATCTCCCTTTCCCACCGCTTTCTGGATACCCTTGACGCCCACGTTCCTCGCGCCCTTTCCCGCCCCTACGCGGGGCGCTGCCCCTGCCACCCAAGTCCCTGCTCAAGCCCGCCCGGCTCCCGCGCGTGCCCAGAGCC|	-	-	5762154	-	-
chr7:86040789..86040876,+	86040853	p1@Aen	[Aen]	Aen			Aen	119.235	800.443	682.259	207.48	871.697	578.431			124.722	575.907	194.584	122.305	487.141	350.158	3259.54	1854.82	5114.36	0.796604	-0.237985	0.122955	-0.0281158	0.845968	-0.241268	3.6308	2.62223	2.80216	2.77023	-0.828641	0.148006	0.049271	0.100154	3	ENSMUST00000107425|ENSMUST00000107421|ENSMUST00000107423	111|111|298	173.333	>1|TTCCGCACCCGGCAAGGGTTCCACGTGAAACCTGGGAAAGCGCGGCCGGGTTTTCAGCACACTGCCCCATTGGCAGACAGCCTCCAGAGCTGTTCTTACCCCAACCTGTGAGCTGGCTGAC|>2|TTCCGCACCCGGCAAGGGTTCCACGTGAAACCTGGGAAAGCGCGGCCGGGTTTTCAGCCTGAATACCAAGGATGTGGTTCGGAGAAGACACAAGAGGAGAAGCCGGCAGCACCAGCGATTC|>3|TTCCGCACCCGGCAAGGGTTCCACGTGAAACCTGGGAAAGCGCGGCCGGGTTTTCAGGTGAGCTAGGGGACGGCCACAGGGAGTCCCGGGCCGCCCGTTTCTGTCGCCAGCCGCCTGTGGCTCTCGGGACGGGTTGGTTTGCAACT…	-	||	86047179|86047293|86047179	-	-
chr5:36236009..36236075,+	36236017	p1@Afap1	[Afap1]	Afap1			Afap1	3.66876	43.8599	170.565	2.7664	38.2019	216.912			0	24.9877	47.8485	0	42.1159	100.558	475.973	215.51	691.483		0.345887	-0.196852		1.06364	0.741592	5.68807	7.19645	6.29012	8.16163	0.60205	0.965172	0.241244	0.965172	1	ENSMUST00000064571	174	174	>1|TCGCGCCTGCGCAGAATCCTCCGGCCACAGCTCGCACCGGCGGTGTCTGGGCTCCAGGTCCCGACTGAGAGATCGCTGAGCTGCGCAGGGCCCCGCCCCGGGCTCCATTGTTGAGGCAGCGGGCGCTCCGCGGGCTGCGCTCCTCTCGGCCGTCCAGTGCTCACGAGCCACTGAATCCTGAGCA|	-	-	36278202	-	-
chr5:104183173..104183207,+	104183199	p1@Aff1	[Aff1]	Aff1			Aff1	31.1845	493.424	1068.27	107.89	331.662	616.709			13.182	191.572	344.509	14.8249	88.4434	337.588	2649.14	990.12	3639.26	1.77438	-0.792124	-0.572403	0.163596	-0.0292366	-1.11069	5.62366	5.29345	3.12999	4.7987	-2.49367	-0.494742	-0.592443	-0.316868	1	ENSMUST00000054979	148	148	>1|CTGAGGACACAGAGCTGAGGACGCGGCTGCCGAGAGCGCAGAGTCTGCGGGGCAGTATCGCCGACGGCTGCGGCCGACGCTGAGAGCGGCGCGGGCGAGAGAGCCTGCGGGGCGAGCGCGCAGATGGATTTGGGACGCCAGGCAGTGTGAGCCGAGCC|	-	-	104183347	-	-
chr5:104183219..104183236,+	104183228	p2@Aff1	[Aff1]	Aff1			Aff1	20.1782	172.698	255.847	16.5984	114.606	193.519			1.014	129.698	185.014	20.3842	26.6734	89.784	773.447	452.568	1226.01	-0.274248	-0.401899	-0.589467		-1.03899	-2.26044	4.37495	7.70181	4.17392	2.4855	-0.201028	-5.21632	-0.466003	-1.20319	1	ENSMUST00000054979	119	119	>1|CCGAGAGCGCAGAGTCTGCGGGGCAGTATCGCCGACGGCTGCGGCCGACGCTGAGAGCGGCGCGGGCGAGAGAGCCTGCGGGGCGAGCGCGCAGATGGATTTGGGACGCCAGGCAGTGTGAGCCGAGCC|	-	-	104183347	-	-
chr8:126001759..126001804,+	126001787	p1@Afg3l1	[Afg3l1]	Afg3l1			Afg3l1	33.0188	296.054	758.564	41.496	1540.23	2205.27			28.392	151.116	149.925	22.2373	136.175	226.256	4874.63	714.101	5588.73	0.32528	1.53899	2.37725	-0.345608	0.592092	-0.149675	4.97629	3.38361	6.47895	3.99656	1.50267	0.612946	1.79938	0.223313	2	ENSMUST00000001520	22	22	>1|CCCAGGGGGCGGCGCGAGGTCAGGGCCGGGGG|	-	-	126001809	-	-
chr11:117670967..117670999,+	117670992	p1@Afmid,p1@Syngr2	[Afmid, Syngr2]	Afmid, Syngr2	Afmid		Afmid	113.732	1233.56	632.885	149.386	1123.48	959.089			106.47	837.683	376.408	72.2713	543.295	360.932	4212.13	2297.06	6509.19	0.391901	0.599335	-0.134792	-0.555765	-0.0604901	-0.624201	4.03065	3.50519	3.79678	3.63604	-0.233867	0.130849	0.17264	-0.435269	5	ENSMUST00000026649|ENSMUST00000132298|ENSMUST00000177131|ENSMUST00000120928|ENSMUST00000175737	26|26|26|26|33	27.4	>1|GTTCCCGGCCATCCGCGGCTCGGTGGCGAAAGCGAC|>2|GTTCCCGGCCATCCGCGGCTCGGTGGCGAAAGCGAC|>3|GTTCCCGGCCATCCGCGGCTCGGTGGCGAAAGCGAC|>4|GTTCCCGGCCATCCGCGGCTCGGTGGCGAAAGCGAC|>5|GTTCCCGGCCATCCGCGGCTCGGTGGCGAAAGCGACATGGAGA|	-	||||	117671018|117671018|117671018|117671018|117671025	-	-
chr8:54597128..54597162,+	54597138	p1@Aga	[Aga]	Aga			Aga	7.33752	90.461	148.122	22.1312	72.9308	163.747			18.252	48.7855	108.457	9.26555	42.1159	64.6445	504.729	291.52	796.249	1.52984	0.14422	-0.308862	-0.941271	-0.742039	-0.209771	4.93097	3.07245	3.38958	3.45727	-1.54139	0.384821	0.0735503	-0.594876	1	ENSMUST00000033920	20	20	>1|TTTTCACGCTGCTCGGCGGGTCACTCAGCT|	-	-	54597158	-	-
chr8:54597049..54597093,+	54597071	p2@Aga	[Aga]	Aga			Aga	18.3438	104.167	193.007	22.1312	57.3028	380.659			22.308	46.4057	213.723	35.2091	112.309	226.256	775.611	656.211	1431.82	0.264223	0.978003	-0.856598	0.646751	0.0820234	1.26605	3.98157	3.51439	4.27606	3.2472	0.29449	-0.267188	0.543483	0.403614	1	ENSMUST00000033920	87	87	>1|GCCTGAGTCTGAGCTGGTGGAGACCTTTCTCGCGCTGGCCGGCTGGGCGCGCGGCCGGCGGGGACTTTTTTCACGCTGCTCGGCGGGTCACTCAGCT|	-	-	54597158	-	-
chr5:138125893..138125957,-	138125928	p1@Agfg2	[Agfg2]	Agfg2			Agfg2	29.3501	52.0836	251.358	2.7664	289.987	995.241			28.392	69.0136	111.647	31.5029	35.0966	98.7624	1620.79	374.414	1995.2	-3.19196	1.98316	2.46579	0.147531	-0.176065	-0.965556	3.34799	2.64852	8.62067	2.06982	5.27268	-0.578703	1.95083	-0.337327	3	ENSMUST00000031736|ENSMUST00000100544|ENSMUST00000151839	122|122|122	122	>1|TCTCGCGGTCGTGGTCGGGGCTGCAGGAGCTGGTGTCAGGGTTGCCGGGCGTGCGAAGGCGGCGGAGGCGGGAAAGGCAGCGAGCGGTTAAAGGGGAGCGACCGCTGACTTGCAGAGGAACCTGGAGGAGAG|>2|TCTCGCGGTCGTGGTCGGGGCTGCAGGAGCTGGTGTCAGGGTTGCCGGGCGTGCGAAGGCGGCGGAGGCGGGAAAGGCAGCGAGCGGTTAAAGGGGAGCGACCGCTGACTTGCAGAGGAACCTGGAGGAGAG|>3|TCTCGCGGTCGTGGTCGGGGCTGCAGGAGCTGGTGTCAGGGTTGCCGGGCGTGCGAAGGCGGCGGAGGCGGGAAAGGCAGCGAGCGGTTAAAGGGGAGCGACCGCTGACTTGCAGAGGAACCTG…	-	||	138092996|138092996|138095102	-	-
chr6:40275470..40275500,+	40275489	p1@Agk	[Agk]	Agk			Agk	22.0126	115.132	646.35	55.328	180.591	401.924			15.21	92.8114	124.406	9.26555	85.6357	93.3754	1421.34	420.704	1842.04	1.31026	-0.684714	0.647169		-0.412025	-0.115442	5.08096	3.7927	3.38447	4.20023	-1.69648	0.407525	-0.296513	-0.303201	1	-	-		-	-	-	-	ENSMUST00000031977	46	46
chr17:34742844..34742884,+	34742864	p1@Agpat1	[Agpat1]	Agpat1			Agpat1	179.769	227.523	139.145	63.6272	135.443	223.291			71.994	107.09	175.444	33.356	141.79	109.536	968.799	639.211	1608.01	-1.49114	0.680392	-0.746179	-1.09845	-0.677138	0.403292	1.02629	1.96504	2.48592	2.89495	1.45963	0.929904	-0.37119	-0.316049	3	ENSMUST00000037489	261	261	>1|TAGCGGCGGCAGTAGCCCCGACCCTCAGAGAGCCGGCAGGGAGGGAGGGAGGGTGTCGGGGGTACTGCCCCCCACCATTCCTACCGATATGGGCCCAGCTTCCCACTCCCACCACCCCTCCATCGGCCGGGGCTAGGACATCCCCAAATCCTGTCGCCCCCTTGGCACCGACACCGAGACAGAGATACAGCCAGCCGCCACCACCGTTGCCGCAGCCTGGCTGGGGAGGGGGCCCGTCCCCCAGGCTCCCCGCCCCATTGAGGTGACCAGA|	-	-	34747398	-	-
chr17:12312140..12312214,+	12312180	p1@Agpat4	[Agpat4]	Agpat4			Agpat4	73.3752	117.873	745.098	185.349	220.529	1548.15			32.448	110.66	1116.46	12.9718	324.293	626.692	2890.38	2223.53	5113.91	1.33097	1.05454	0.90089	-1.29025	-0.832604	1.54688	3.54699	5.21953	3.25088	6.14217	-0.296106	0.922635	1.06094	-0.385719	2	ENSMUST00000024594	181	181	>1|AGTGTTGGCTGACTTACAGCTTCTCTAAAGTAGAGGCAGTTTCTGAACCTCAGGCTCCTGCCTCGCAGTTCTGGCTTGTGAGCACCAATGCAAAGAACTGCCCGGAGCGAGACACTTTCCTGAGCCCCGGATCTTTCCCCCTTCTGGAACTATCCCACCATACGGATTTATCTCTTGAGAATCCCCACACC|	-	-	12344637	-	-
chr8:18846524..18846544,+	18846533	p2@Agpat5	[Agpat5]	Agpat5			Agpat5	5.50314	95.9435	345.618	5.5328	104.187	240.304			4.056	41.6462	105.267	0	8.42318	147.246	797.088	306.638	1103.73		-0.523404	0.118325		0.482231	-2.23977	6.20239	5.01595	5.83759	8.28696	-0.364799	3.27101	-0.352584	0.0440864	2	-	-		-	-	-	-	ENSMUST00000149565|ENSMUST00000033847	26|26	26
chr8:24318833..24318876,-	24318846	p1@Agpat6	[Agpat6]	Agpat6			Agpat6	174.266	2121.72	1678.72	376.23	2432.76	1082.43			66.924	766.289	899.552	207.548	506.795	624.897	7866.13	3072	10938.1	1.10811	-0.632846	0.197318	1.62558	-0.525236	-0.596005	4.44286	4.62728	3.22221	2.44413	-1.22065	-2.18315	-0.0305444	-0.371539	1	ENSMUST00000167004	889	889	>1|CACGCTCTTACGTACGCCTGGGCCGGCGGCGGGCAGGGCAGGGCGGGAGCGGCAGTCACCGAGGACTGGAGCCGAGCCTCACGGCCGCTCTGGCAGCATGTAAACAGCCTTTTGCCAAGAACCCAGGTCACCGCTGAGAAGGCTGCCTTAAGGGAGAAGAATATCGGAGGACACCAATGCCAGGCGTGTTTGGAACAGTGCTCAGTACAGGCAGCATGAGACGTTCTGTGCCAGCCTCTGTGTGCTACTGGCAAAGGCTGGGGCTCTCTGGGTAGGAGGGTCCTGGGTCAGCCAGCATCAGGAGCCCCCTCAAGGGAGCATGGGACCAGCTATGAACTCTTTACAGTGAACTCAGTTTTAGCTTATGAAGGAATTTTAAGTAAACGTTACTTAATT…	-	-	24285023	-	-
chr8:24318791..24318828,-	24318803	p2@Agpat6	[Agpat6]	Agpat6			Agpat6	66.0377	1154.06	695.724	268.341	1144.32	578.431			47.658	649.68	988.869	181.605	647.181	763.164	3906.92	3278.16	7185.07	2.01451	-0.266161	-0.0122269	1.91892	-0.373571	-0.00555486	4.79743	5.08894	2.68031	2.95372	-2.11713	-2.13522	0.0555792	-0.0829611	1	-	-		-	-	-	-	ENSMUST00000167004	846	846
chr8:24318879..24318884,-	24318881	p4@Agpat6	[Agpat6]	Agpat6			Agpat6	14.675	131.58	152.61	30.4304	203.164	142.481			8.112	108.28	60.6081	20.3842	51.943	107.741	674.941	357.068	1032.01	1.02733	-0.0987484	0.624786	1.27799	0.824809	-1.05259	4.22962	4.29784	3.48428	2.93924	-0.745339	-1.3586	0.331035	0.0247223	1	ENSMUST00000167004	924	924	>1|GTCCAGCGGCGTAGACAAAGACGGGCGGGCGTACGCACGCTCTTACGTACGCCTGGGCCGGCGGCGGGCAGGGCAGGGCGGGAGCGGCAGTCACCGAGGACTGGAGCCGAGCCTCACGGCCGCTCTGGCAGCATGTAAACAGCCTTTTGCCAAGAACCCAGGTCACCGCTGAGAAGGCTGCCTTAAGGGAGAAGAATATCGGAGGACACCAATGCCAGGCGTGTTTGGAACAGTGCTCAGTACAGGCAGCATGAGACGTTCTGTGCCAGCCTCTGTGTGCTACTGGCAAAGGCTGGGGCTCTCTGGGTAGGAGGGTCCTGGGTCAGCCAGCATCAGGAGCCCCCTCAAGGGAGCATGGGACCAGCTATGAACTCTTTACAGTGAACTCAGTTTTAG…	-	-	24285023	-	-
chr8:108161303..108161397,-	108161338	p1@Agrp	[Agrp]	Agrp			Agrp	232.966	531.801	130.168	44.2624	501.834	116.962			92.274	217.75	38.2788	29.6498	210.58	44.892	1557.99	633.424	2191.42	-2.38285	-0.153708	-0.0835967	-1.62157	0.22717	-0.0481937	1.50464	1.46733	3.79027	3.08577	2.28563	1.61844	-0.432366	-0.288307	1	ENSMUST00000194091	326	326	>1|AGCCAGCCTTGCAGAGGGAGCTCTCGGCAGCTCAGGGGTCCCCTCTGCTCGCAGCCACAGCAGCGCCGCCTGCGACACTCGGCGGCGACGGAGACCGGCAGCGGGGACGATCGGACTACGAGAGACTAGAGAGCACCCCAGCTGCTGGAGAAGCAACGCAGGGAGATCGGNNNNNNNNNNNNNNNNNNNNNNNNNNNNNNNNNNNNNNNNNNGGAGGCACCTCATGCCCTGGCTACAGGAAGCAGTCACGTGTGGACCCTTTATTAGGCACTGCCATATAAGCTCAGGGCACAAGAGACCAGGACATCCCTAGGCAAAGATCAGCAAGCAAAGGCC|	-	-	108090655	-	-
chr13:59658591..59658707,-	59658646	p1@Agtpbp1	[Agtpbp1]	Agtpbp1			Agtpbp1	20.1782	41.1186	130.168	8.2992	177.118	91.4431			11.154	46.4057	0	9.26555	30.885	30.5266	468.325	128.237	596.561	-1.23266	-0.50709	2.09347		5.95543	-0.579688	3.05443	2.00894	4.93442	2.66444	1.87998	0.655498	0.53092	0.293876	8	ENSMUST00000022040|ENSMUST00000109830|ENSMUST00000171606|ENSMUST00000165370|ENSMUST00000166585|ENSMUST00000167096	97|97|222|97|228|97	139.667	>1|CCGCGCTGACGTTGCCCGGGATGCGGGCATGTTCCGCGGCCGTCTTCGCCGCCTCCGCCTCTCCTGCCACCCGGATTATCTGCAATGCTGGAATGAAGTAACTCAAG|>2|CCGCGCTGACGTTGCCCGGGATGCGGGCATGTTCCGCGGCCGTCTTCGCCGCCTCCGCCTCTCCTGCCACCCGGATTATCTGCAATGCTGGAATGAAGTAACTCAAG|>3|CCGCGCTGACGTTGCCCGGGATGCGGGCATGTTCCGCGGCCGTCTTCGCCGCCTCCGCCTCTCCTGCCACCCGGGTTTGTATGAAAANNNNNNNNNNNNNNNNNNNNNNNNNNNNAGAAGGGCGGCGGGCGGCGAGGAACCGCCGTGCGCCCCGGGAGTCCCGGGCGCGGAGGC…	-	|||||	59551497|59595172|59595172|59629831|59632542|59633362	-	-
chr1:181733756..181733833,-	181733812	p1@Ahctf1	[Ahctf1]	Ahctf1			Ahctf1	38.522	101.426	323.175	38.7296	284.777	814.482			22.308	221.32	57.4182	11.1187	94.0589	163.407	1601.11	569.63	2170.74	0.00765574	1.33222	1.48484	-0.973096	1.50079	-1.2301	3.44545	3.61388	4.8091	4.47266	1.36365	0.858782	1.2961	-0.164318	1	ENSMUST00000027768	337	337	>1|GATCCCCGCCCTGGCCACGATCCTTCCCTGGGCGGAGAGGCTGTGTGTGTGGGGTTCGGGCAGTGCGCCCGGGGTAATGCGCAGAGCGCGGCCCGAGCGGTGCCAGCCCAGTAAGTCGAGTCGCCAGCGGGGAGGACGCGGCGCGGGCGGTGGGACGAGTTCGAAGCCGGGATTGGGCGAAGGAGCACCCGGGGCCTGAGGGGACCGGCGAGAGACTGAGCGAGAAGCGGCTTNNNNNNNNNNNNNNNNNNNNNNNNNNNNTGTCTCCCGGGAGATGCTGTGACGGACCGCACGGAAGCAGCGACGCCGGGGCCCTTGGCGGCCTGGCCCGCGGGCTCAGTGGCAGT|	-	-	181676463	-	-
chr2:154900192..154900238,-	154900227	p1@Ahcy	[Ahcy]	Ahcy			Ahcy	12.8407	30.1537	148.122	5.5328	46.8841	216.912			7.098	0	22.3293	22.2373	12.6348	44.892	460.445	109.191	569.636		0.548782	0.628344	1.58137	0.991552		3.74425	1.58719	5.45318	1.35166	1.70893	-0.235538	0.493823	1.42329	2	ENSMUST00000054607|ENSMUST00000137242	100|100	100	>1|TATTCAAATAAGAAGATATTTAAAGACGCCGGCGCCAGGCGTAGATCCCTNNNNNNNNNNNNNNNNNNNNNTTCACTGAGTTCATCAGTCCTAGCGGAAGCGCCGCCAGC|>2|TATTCAAATAAGAAGATATTTAAAGACGCCGGCGCCAGGCGTAGATCCCTNNNNNNNNNNNNNNNNNNNNNTTCACTGAGTTCATCAGTCCTAGCGGAAGCGCCGCCAGC|	-	|	154886184|154891395	-	-
chr10:20672403..20672489,+	20672430	p1@Ahi1	[Ahi1]	Ahi1			Ahi1	16.5094	82.2373	381.526	33.1968	156.28	401.924			11.154	34.5068	124.406	1.85311	74.4048	211.89	1071.67	458.215	1529.89	0.986278	0.0750459	0.922135		0.765874	1.09742	4.77054	3.77387	4.0514	6.92931	-0.719136	3.15544	0.300001	0.758974	1	ENSMUST00000105525	286	286	>1|GCGCCTCCGCACTGCGGCACTGAGCTGGCTGGACAGCGCGCGTCGCCAGCGGTCCTGCCGGCCAAGCTGCCGCCTCCCTCGTCCTCGCCTAGGCGCAGGGAACCGCTTCGCGCCGCCGCCGGGCTGTCCCTCCTCTCTCCTGTTACCCTCAAAGTAACCTTCTGGCTACCTTAGAACTAAAATTGGCACTAAAAGCCTAGAGAAGTGAGCAGCACGTGAAGATTCAGAGGACAATGTTAGTGTAGAGCCATACAAACAAGAAAAGACAAGTAAACACTACCCAGATCGCACAGGAA|	-	-	20679575	-	-
chr19:9063767..9063785,+	9063774	p1@Ahnak	[Ahnak]	Ahnak			Ahnak	632.861	4366.8	8196.08	2987.71	3887.91	4738.03			354.9	1977.6	6370.23	1072.95	2510.11	4449.7	24809.4	16735.5	41544.9	2.23818	-0.790583	-0.167562	1.59474	-0.51759	0.343924	4.31005	4.55397	1.52948	2.69689	-2.78057	-1.85708	-0.184244	-0.115566	2	ENSMUST00000092956|ENSMUST00000092955	256|256	256	>1|ACGGGGGCCCGGCCACTTGGAGCAGCTCTGCCGCGGGGACTGCACTGTCCGCCCTGCCAGACCCGCCCCGACTGGGGCTCGCCGTCGCCAGCAGTCAGCACTGCGACCTCGGGCCCTTCGCCGGCTATGGCTGCGTCCTGGGGCTGAGCCCGCAGGTTGTGTGACCAAGATTCGCAAAGAAAGAGAGAGAGAGACCGATACAGAAAGAGAAGAAGGAGGGGCGGGCTCCTGGCAAGGCGTTTGCTCCTGAGCAGAGTCCTGCAAAG|>2|ACGGGGGCCCGGCCACTTGGAGCAGCTCTGCCGCGGGGACTGCACTGTCCGCCCTGCCAGACCCGCCCCGACTGGGGCTCGCCGTCGCCAGCAGTCAGCACTGCGACCTCGGGCCCTTCGCCGGCT…	-	|	9074262|9074262	-	-
chr19:9063817..9063828,+	9063822	p5@Ahnak	[Ahnak]	Ahnak			Ahnak	3.66876	82.2373	237.893	60.8608	131.97	255.19			0	77.3428	172.255	20.3842	136.175	360.932	771.82	767.088	1538.91	3.87963	0.101055	0.679057		1.065	0.812111	6.26515	8.96635	2.6594	4.57452	-3.60574	-4.39183	0.467851	1.05044	2	ENSMUST00000092956|ENSMUST00000092955	208|208	208	>1|CCGCCCTGCCAGACCCGCCCCGACTGGGGCTCGCCGTCGCCAGCAGTCAGCACTGCGACCTCGGGCCCTTCGCCGGCTATGGCTGCGTCCTGGGGCTGAGCCCGCAGGTTGTGTGACCAAGATTCGCAAAGAAAGAGAGAGAGAGACCGATACAGAAAGAGAAGAAGGAGGGGCGGGCTCCTGGCAAGGCGTTTGCTCCTGAGCAGAGTCCTGCAAAG|>2|CCGCCCTGCCAGACCCGCCCCGACTGGGGCTCGCCGTCGCCAGCAGTCAGCACTGCGACCTCGGGCCCTTCGCCGGCTATGGCTGCGTCCTGGGGCTGAGCCCGCAGGTTGTGTGACCAAGATTCGCAAAGAAAGAGAGAGAGAGACCGATACAGAAAGAGAAGAAGGAGGGGC…	Inr|Inr	|	9074262|9074262	-	-
chr12:88607646..88607710,+	88607694	p1@Ahsa1	[Ahsa1]	Ahsa1			Ahsa1	190.776	2157.36	5866.53	340.267	3620.49	5131.45			172.38	1481.41	3461.04	203.842	981.301	3192.72	17306.9	9492.7	26799.6	0.833134	-0.193123	0.746786	0.241215	-0.116403	-0.593958	5.39067	4.83753	4.68283	4.35255	-0.707839	-0.484979	0.146421	-0.224437	1	ENSMUST00000021425	97	97	>1|TGCTGCTTCTAGTAGTTTCCAGGCGCTGCCAGGCGGCTGGGACCGAGCGGTCCTCAGGCTGTGGCTGCGGCTGCTTGGGAGCTGGTAGCGGTGCGATAAGTGAGCTG|	-	-	88607791	-	-
chr11:23397867..23397962,-	23397916	p1@Ahsa2	[Ahsa2]	Ahsa2			Ahsa2	75.2096	726.429	1467.75	160.451	607.757	852.76			35.49	229.649	191.394	81.5368	117.925	396.845	3890.36	1052.84	4943.2	1.08808	-0.783044	-0.257134	1.18868	1.05008	-0.958598	4.85739	3.55001	3.18228	2.65098	-1.67512	-0.899026	-0.485323	0.384966	4	ENSMUST00000109539|ENSMUST00000147157|ENSMUST00000128559	202|63|63	109.333	>1|CGATCGGCTCACAGACCTTCTGGCCGGAAACCCGCGCGCTCCCGCTACCAGGGCCGTCGTCGTCAGCGCCGCCATGGCCAAGTGGGGCCAGGGGGACCCGCGCTGGATCGTGGAGGAGCGGGAGGACGGGACCAACGTGAACAACTGGCACTGAGCGGGATGCCACCATTTGGTCCAAGGGGAAGCTCCGAGAGCTCCTGGTTGGCATTGCT|>2|CGATCGGCTCACAGACCTTCTGGCCGGAAACCCGCGCGCTCCCGCTACCAGGGCCGTCGTCGTCAGCGCCGCC|>3|CGATCGGCTCACAGACCTTCTGGCCGGAAACCCGCGCGCTCCCGCTACCAGGGCCGTCGTCGTCAGCGCCGCC|	-	||	23390397|23391108|23393153	ENSMUST00000020529	63	63
chr17:48549531..48549587,+	48549566	p2@AI314976	[AI314976]	AI314976			AI314976	60.5345	455.046	439.877	121.722	461.895	178.633			52.728	328.41	385.978	33.356	308.85	335.792	1717.71	1445.11	3162.82	1.0018	-1.29771	0.021529	-0.652775	-0.200671	-0.0884508	3.87487	3.74746	2.39089	4.25213	-1.48398	0.504676	-0.325737	-0.178039	2	-	-		-	-	-	-	ENSMUST00000167180	169	169
chr17:48549507..48549527,+	48549515	p3@AI314976	[AI314976]	AI314976			AI314976	22.0126	213.817	148.122	80.2256	177.118	19.1393			52.728	174.914	92.5071	12.9718	133.367	59.2574	660.434	525.745	1186.18	1.8423	-2.91984	-0.27097	-1.98225	-0.638222	-0.389961	4.00894	2.33155	1.28532	3.84152	-2.72362	1.50997	-0.473006	-0.637676	2	-	-		-	-	-	-	ENSMUST00000167180|ENSMUST00000046651	220|85	152.5
chr17:48549473..48549487,+	48549479	p5@AI314976	[AI314976]	AI314976			AI314976	18.3438	222.041	103.237	116.189	251.785	36.1519			9.126	98.7609	63.798	72.2713	120.732	21.5482	747.747	386.237	1133.98	2.6305	-1.50096	0.180986	2.91836	-1.54412	0.288477	4.11172	4.08231	1.30559	0.972357	-2.80613	-3.10996	0.233672	0.320726	2	ENSMUST00000046651	121	121	>1|TTCTGAAGCCCTTACTACCGAGAGCGGGCGCCGCTACCCAGCTAGAGAGGCTCACTTCCGCCCCGTTAAGGGATGGGGGCGGCCATCTTGAGTAAGGAACTCTTAAATTCTGGAAATAGCGACTCAGTAGC|	-	-	48550190	ENSMUST00000167180	256	256
chr17:48549305..48549429,+	48549369	p1@AI314976	[AI314976]	AI314976			AI314976	84.3815	603.073	197.496	287.706	800.503	185.013			43.602	272.485	76.5576	118.599	404.313	120.311	2158.17	1035.87	3194.04	1.76358	-0.093952	0.408278	1.43325	0.648737	0.568434	3.23841	2.98655	1.77451	2.14049	-1.46389	-0.846057	0.524565	0.711379	2	ENSMUST00000167180|ENSMUST00000046651	366|231	298.5	>1|CCCACCCTCTGGGGCCGAATGCGCAAGCGCTCTTCTTCTCCAGTCGGGGTCGGCATCTCGGTACGCATGCCTGAGCGGTAGCGGGAGCCTACGGAATTTCCCGCCGGAAATTCTGAAGCCCTTACTACCGAGAGCGGGCGCCGCTACCCAGCTAGAGAGGCTCACTTCCGCCCCGTTAAGGGATGGGGGCGGCCATCTTGAGTGTGCGTACAATCAAAAGGCTTTGGCGGGATTTGTTGCGTGTCGGGACTCTTCTGTTGCTTTCCTACCTACGAGGGTTTCATCCCGAACCCTTCCCTGCTTGGAGGAGGGCCTGCTGACGGCCGATTCCTTTGCAGAAGGAACTCTTAAATTCTGGAAATAGCGACTCAGTAGC|>2|CCCACCCTCTGGGGCC…	-	|	48550190|48550190	-	-
chr17:27702623..27702702,-	27702652	p1@AI413582	[AI413582]	AI413582			AI413582	122.903	186.404	116.702	329.202	239.63	91.4431			129.792	160.635	54.2283	38.9153	547.507	48.4834	1086.28	979.561	2065.85	1.41778	-0.350185	0.361514	-1.72492	-0.159995	1.76592	1.29882	0.725025	0.00816544	3.91967	-1.29065	3.19465	0.631578	0.880432	1	ENSMUST00000154473	127	127	>1|GGACTCTTCCGGGGCCGGGGCCAACCCAAGGTGTTGCTGTCAGGGCTGCACGGCGGGAGGGAGCCCAGAGGAGGCGCCCTCCCGAGGCCACCACTGCCCATGCAGTCCATCCATTCAGCCATCTGGCTACTGATGTC|	-	-	27700895	-	-
chr19:8955373..8955418,-	8955383	p1@AI462493	[AI462493]	AI462493			AI462493	544.811	1496.72	305.221	221.312	1135.64	314.734			189.618	427.171	105.267	38.9153	394.486	114.924	4018.43	1270.38	5288.81	-1.29774	0.0442096	-0.398148	-2.27007	0.126052	-0.114699	1.7248	1.48707	2.70951	3.69341	0.984711	2.20634	-0.489238	-0.396763	1	ENSMUST00000096253	69	69	>1|AGGGAGCGGTGAGATGTCATGGCTTCCTTCTAGGCTGCGGGAGGAAGCGGACGGCACCTCTTTTGTAGTGTAATCCGCC|	-	-	8954956	-	-
chr19:8955322..8955344,-	8955336	p2@AI462493	[AI462493]	AI462493			AI462493	163.26	699.017	125.679	226.845	408.065	93.5697			68.952	291.523	38.2788	127.865	122.136	21.5482	1716.44	670.303	2386.74	0.473301	-0.423672	-0.775792	0.886159	-0.81461	-1.2517	2.33316	2.2497	1.14319	0.167667	-1.18996	-2.08203	-0.439298	-0.55344	1	ENSMUST00000096253	22	22	>1|CGGACGGCACCTCTTTTGTAGTGTAATCCGCC|	TOP	-	8954956	-	-
chr5:23218479..23218509,-	23218484	p1@AI506816	[AI506816]	AI506816			AI506816	31.1845	35.6361	219.939	80.2256	41.6748	261.57			26.364	2.37978	92.5071	14.8249	81.4241	154.428	670.229	371.928	1042.16	1.34925	0.249574	0.222937	-0.809799	0.73619	4.83026	3.01472	1.82812	1.91176	3.94699	-1.10296	2.11888	0.418641	1.04477	0	-	-		-	-	-	-	-	-
chr10:84565503..84565578,+	84565539	p1@AI597468	[AI597468]	AI597468			AI597468	47.6939	570.178	296.244	88.5248	378.546	370.026			48.672	191.572	130.786	18.5311	129.155	177.772	1751.21	696.489	2447.7	0.885357	0.320355	-0.590306	-1.36948	0.441371	-0.566966	4.16898	2.71499	3.07282	4.01382	-1.09616	1.29883	-0.126912	-0.188789	1	-	-		-	-	-	-	ENSMUST00000095383	209	209
chr1:43155557..43155605,+	43155593	p1@AI597479	[AI597479]	AI597479			AI597479	165.094	1603.63	727.144	248.976	1903.15	844.254			98.358	489.045	363.649	229.786	402.909	475.855	5492.24	2059.6	7551.84	0.591249	0.215298	0.246978	1.21999	0.387511	-0.279198	3.81539	3.10944	3.46136	1.93287	-0.354035	-1.17657	0.263631	0.220971	1	ENSMUST00000010434	15	15	>1|GCCAGGGGGTCTCCTGGCGACAACC|	TOP	-	43155608	-	-
chr7:48648689..48648726,-	48648717	p1@AI987944	[AI987944]	AI987944			AI987944	7.33752	79.496	287.267	58.0944	39.9383	170.127			15.21	30.9371	140.356	14.8249	82.828	192.138	642.26	476.293	1118.55	2.90229	-0.754057	-0.984206	-0.0358075	0.451674	1.40633	5.55027	3.45091	1.84543	4.16793	-3.70484	0.717011	-0.479574	0.634439	1	ENSMUST00000071804	119	119	>1|GACCTTCCGGGTTCCTTGCGGCAGTTTCAGCTCTATAACGGACCCTGCTGGAAAAGTTCTGATTGTTTTTCTCTAAGCGCTGCTGCTGGGTGCTGTGAGGGAAGCTCTAGCAAGTTGCTAATTCGCGAC|	-	-	48629711	-	-
chr2:31805777..31805801,+	31805793	p1@Aif1l	[Aif1l]	Aif1l			Aif1l	23.8469	844.303	758.564	179.816	1036.66	844.254			21.294	471.196	322.18	81.5368	616.296	813.443	3687.44	2325.95	6013.39	2.88872	0.15431	0.295952	1.91234	1.33482	0.386935	6.04122	5.18691	3.38322	4.12384	-2.658	-1.06307	0.341102	0.891071	3	ENSMUST00000151276|ENSMUST00000148056	175|77	126	>1|TCCCGTCGCCACACGCTGCCGAAGGTCTGGACCAGACGACTTTTCCTCCCTGTTGTCCCTGGCCTTGTCCGGAGTCGGGCTCATACCATGTCGGTCGCACTCAGCAACAGGTTCCAAGGAGGGAAGGCGTTCGGTTTGCTCAAAGCCCGGCAGGAGAAGAGGCTCGAGGAGATCAATCGGATCTG|>2|TCCCGTCGCCACACGCTGCCGAAGGTCTGGACCAGACGACTTTTCCTCCCTGTTGTCCCTGGCCTTGTCCGGAGTCGGGCTCATACC|	-	|	31825154|31805870	ENSMUST00000001920	77	77
chrX:45866562..45866615,-	45866588	p1@Aifm1	[Aifm1]	Aifm1			Aifm1	31.1845	194.628	924.64	44.2624	262.204	778.33			32.448	104.71	242.432	12.9718	54.7507	251.395	2235.25	698.708	2933.96	0.498512	-0.248364	0.429014	-1.29025	0.0522688	-0.929212	5.14328	3.39934	4.53959	4.50856	-0.603696	1.10922	-0.0847402	-0.249997	2	-	-		-	-	-	-	ENSMUST00000114945|ENSMUST00000037349	74|74	74
chrX:45866621..45866636,-	45866628	p3@Aifm1	[Aifm1]	Aifm1			Aifm1	1.83438	35.6361	309.71	2.7664	41.6748	199.899			20.28	33.3169	210.533	14.8249	19.6541	120.311	591.52	418.92	1010.44		-0.630368	0.222937	-0.43932	-0.804725	-0.746672	7.21095	3.55568	6.2116	3.19626	-0.999344	-0.359424	-0.505921	-0.769018	2	-	-		-	-	-	-	ENSMUST00000114945|ENSMUST00000037349	114|114	114
chrX:45866695..45866742,-	45866703	p2@Aifm1	[Aifm1]	Aifm1			Aifm1	7.33752	57.5661	237.893	2.7664	32.9925	106.329			0	32.127	114.836	9.26555	43.5198	87.9883	444.885	287.737	732.622		-1.15803	-0.793857		-0.382289	0.432084	5.23886	8.20421	5.41974	3.75678	0.180887	-4.44743	-1.08887	-0.0618647	2	ENSMUST00000114945|ENSMUST00000037349	189|189	189	>1|CTCCAGCCTCAGTGCCTTTCCCCCTGGCTCTAGTGGGCCGGTTCCTCTATCCAATGTCCACTCGGGGCTGGGAGGAGGAGCCTGCGTAGTGTGCGTGTGACGGGAGGGGGAGCGGACCCGAGCCCGTGGTATTCGACCCGTTCGACGGTGCGTGGAAGGAAAAGGAAGGAGCGGGAGCTTCCGAGGAGTGATCGCCGAA|>2|CTCCAGCCTCAGTGCCTTTCCCCCTGGCTCTAGTGGGCCGGTTCCTCTATCCAATGTCCACTCGGGGCTGGGAGGAGGAGCCTGCGTAGTGTGCGTGTGACGGGAGGGGGAGCGGACCCGAGCCCGTGGTATTCGACCCGTTCGACGGTGCGTGGAAGGAAAAGGAAGGAGCGGGAGCTTCCGAGGAGTGATC…	-	|	45828293|45828293	-	-
chr3:132346788..132346820,-	132346805	p1@Aimp1	[Aimp1]	Aimp1			Aimp1	236.635	2557.58	8626.98	2805.13	5898.71	2613.57			150.072	2095.4	9662.21	2803.76	2001.91	3875.08	22738.6	20588.4	43327	3.56454	-1.72264	1.20546	4.21909	-1.31802	-0.0658298	5.55972	6.28706	1.60131	1.06758	-3.95841	-5.21948	-0.0131685	-0.455979	5	ENSMUST00000029663|ENSMUST00000196206	48|199	123.5	>1|CTGGCCCTTCCTTCTCCCGGCTGAGGCTGCTCAAGAGCTGCGGTTGGGTCACCGCTTC|>2|CTGGCCCTTCCTTCTCCCGGCTGAGGCTGCTCAAGAGCTGCGGTTGGGTCACCGCTTCATTGAGAGTGCAAAGGATTTCCAGTGTTTGTACGTGAGGACGGGTTGAAGAAGGAGATTCCTTGATTTCAACAGATATTAGAAACACCAGCTACCACTATACTCCCGGCAACAGTTTAGTTATTGGGTTTCTCTGCCGATTCTGGGGAAAG|	TOP|TOP	|	132323538|132337075	-	-
chr5:144670651..144670710,-	144670671	p1@Aimp2	[Aimp2]	Aimp2			Aimp2	221.96	688.052	6400.66	248.976	599.075	3838.48			122.694	302.232	2950.66	72.2713	464.679	2142.25	11997.2	6054.78	18052	0.165355	-0.73761	-0.199626	-0.759491	-0.46182	0.619744	4.99401	4.72294	4.15296	5.16311	-0.841052	0.440173	-0.641428	-0.333281	2	ENSMUST00000031613|ENSMUST00000100483	88|88	88	>1|CAGCAGAGTCAGAAAGAAGGCGGCTGCTGTCTGAGGTGGCCTTGGGTGGCTTCTGAGCGTTCCTGTCCCTCGCCCGCTACCTTCCTTGGGTTCCCACC|>2|CAGCAGAGTCAGAAAGAAGGCGGCTGCTGTCTGAGGTGGCCTTGGGTGGCTTCTGAGCGTTCCTGTCCCTCGCCCGCTACCTTCCTTGGGTTCCCACC|	-	|	144663670|144663670	-	-
chr19:4121536..4121581,-	4121546	p1@Aip	[Aip]	Aip			Aip	1029.09	3544.43	1234.35	2072.03	4254.3	1975.6			965.328	1827.67	475.295	1326.83	1913.47	1271.34	14109.8	7779.93	21889.7	1.00933	0.678318	0.263335	0.458685	1.41851	0.0661646	2.21473	1.25397	1.58793	1.26291	-0.626798	0.00894118	0.515402	0.465052	3	ENSMUST00000025767	113	113	>1|TTCTGCCCTCAGTCAAAATGGCGCTTGCTCAGAAGCTGCCGAGGCGCTAGGAGTTGCCGAAACAGGTCCGGAAGCTACCGAGCGAGTCCGGAAGTTGCCGAAAGGGAGCAGCGGGGAAGGAGG|	-	-	4114590	-	-
chr19:4121438..4121486,-	4121464	p2@Aip	[Aip]	Aip			Aip	108.228	737.394	1562.01	113.422	1585.38	1616.2			90.246	429.55	1304.67	79.6837	359.389	1158.21	5722.64	3421.75	9144.39	0.0673223	0.049187	1.1038	-0.178525	-0.171713	-0.256953	4.40277	4.25672	4.81289	4.24282	0.410112	-0.0139082	0.461311	-0.191794	3	-	-		-	-	-	-	ENSMUST00000117831|ENSMUST00000025767|ENSMUST00000121402	31|31|31	31
chr12:103995979..103996019,-	103995988	p1@AK010878,p1@Ak010878-moap1,p1@Moap1	[AK010878, Ak010878-moap1, Moap1]	AK010878, Ak010878-moap1, Moap1	AK010878		AK010878	71.5408	805.925	430.9	113.422	637.276	299.848			79.092	594.945	38.2788	53.7402	343.947	66.4402	2358.91	1176.44	3535.36	0.661165	-0.52239	-0.33849	-0.553261	0.787604	-0.789688	4.10227	2.99316	3.04096	2.92131	-1.06131	-0.0718518	-0.31649	-0.617456	4	ENSMUST00000179306|ENSMUST00000173969|ENSMUST00000179263	34|34|34	34	>1|GGTGGCGTTTCTCCGAGGCGCGCTGTTGAAGCTGAGTGGTCGCC|>2|GGTGGCGTTTCTCCGAGGCGCGCTGTTGAAGCTGAGTGGTCGCC|>3|GGTGGCGTTTCTCCGAGGCGCGCTGTTGAAGCTGAGTGGTCGCC|	-	||	103958363|103992284|103994696	ENSMUST00000174651	34	34
chr5:134652210..134652246,+	134652236	p1@AK053742,p1@AK163565	[AK053742, AK163565]	AK053742, AK163565	AK053742		AK053742	355.87	268.642	210.962	567.112	203.164	191.393			119.652	96.3811	108.457	113.04	228.83	59.2574	1797.14	725.617	2522.76	0.67153	-0.140097	-0.402172	-0.0816638	-0.866563	1.24314	0.42997	0.773138	-0.522844	1.34581	-0.952814	0.572673	0.202834	0.305462	0	-	-		-	-	-	-	-	-
chr5:89149794..89149807,-	89149801	p1@AK085541	[AK085541]	AK085541			AK085541	258.648	63.0486	148.122	857.584	239.63	178.633			160.212	40.4563	79.7475	239.051	124.944	50.279	1745.67	694.69	2440.35	1.72735	0.269384	1.91788	0.575856	-0.660223	1.61489	-0.291954	-0.413007	-1.03499	-0.447031	-0.743032	-0.0340242	1.44031	0.562188	0	-	-		-	-	-	-	-	-
chr2:32483938..32483982,+	32483968	p2@Ak1	[Ak1]	Ak1			Ak1	3.66876	243.971	219.939	47.0288	227.475	210.532			11.154	161.825	204.154	40.7684	150.213	190.342	952.613	758.457	1711.07	3.51111	-0.0629167	-0.100787	1.82421	-0.100805	-0.107077	6.79963	4.97483	3.20572	3.0469	-3.59391	-1.92794	0.0528274	0.0159242	4	ENSMUST00000156578	33	33	>1|CTTGTCTTGCAGAGTGCTGACCTAGCTCCCAGATCTCAGCAGG|	-	-	32484001	-	-
chr2:32484987..32485034,+	32485001	p4@Ak1	[Ak1]	Ak1			Ak1	18.3438	112.391	49.374	55.328	118.078	70.1773			42.588	85.6721	51.0384	75.9775	146.002	61.0531	423.692	462.331	886.023	1.5669	0.502959	0.0709126	0.827749	0.256184	0.765627	3.10619	1.67103	1.75746	1.44039	-1.34873	-0.230646	0.434509	0.657133	5	ENSMUST00000068271	80	80	>1|TGTGGTTGCCACAGTACTGCTGGGTCAGAGCAGCCATGGCAGGGCCAAAGCCAGAGAGAGGGGAGGTGACAGCGGGAACAGGATAGGATC|	-	-	32485081	-	-
chr2:32485037..32485060,+	32485043	p9@Ak1	[Ak1]	Ak1			Ak1	0	43.8599	98.748	27.664	69.4579	65.9241			5.07	60.6844	57.4182	5.55933	84.2318	70.0315	305.654	282.995	588.649	5.81578	-0.579331	0.657232		0.284252	0.469741	8.16096	4.41231	2.27043	4.67476	-5.89053	0.262448	0.192594	0.374453	5	ENSMUST00000068271	38	38	>1|GGCCAAAGCCAGAGAGAGGGGAGGTGACAGCGGGAACAGGATAGGATC|	-	-	32485081	-	-
chrM:2132..2143,+	2137	p2@AK138995	[AK138995]	AK138995			AK138995	110.063	139.803	80.7938	69.16	52.0934	4.25317			33.462	94.0013	15.9495	72.2713	95.4627	1.79568	456.167	312.943	769.109	-0.666464	-4.09618	-1.41559	1.09945		0.0221402	0.999814	1.70141	-0.293256	0.425852	-1.29307	-1.27556	-1.39403	0.240592	0	-	-		-	-	-	-	-	-
chr15:86025306..86025325,+	86025319	p3@AK155692	[AK155692]	AK155692			AK155692	150.419	1036.19	2284.67	882.482	1812.85	1405.67			113.568	327.22	689.018	300.204	87.0396	680.563	7572.28	2197.61	9769.9	2.54861	-0.700528	0.806675	1.39845	-0.0178013	-1.90446	4.45993	3.15598	1.86617	1.35296	-2.59376	-1.80303	0.240479	-0.0813884	0	-	-		-	-	-	-	-	-
chr13:110475767..110475796,+	110475777	p3@AK157976	[AK157976]	AK157976			AK157976	16.5094	43.8599	193.007	13.832	46.8841	123.342			3.042	26.1776	54.2283	0	0	35.9136	437.435	119.361	556.796	-0.247094	-0.643889	0.0951478		-0.58781	-5.73756	3.80272	4.51361	3.57437	6.18641	-0.228344	1.6728	-0.460054	-1.20502	7	-	-		-	-	-	-	-	-
chr9:64026082..64026163,+	64026130	p2@AK183772,p2@AK195112	[AK183772, AK195112]	AK183772, AK195112	AK183772		AK183772	1.83438	68.531	592.488	193.648	116.342	165.874			3.042	7.13934	277.521	29.6498	28.0773	68.2358	1138.72	413.666	1552.38	6.37797	-1.83358	0.759242	3.08951	-2.01606	1.90335	8.1466	6.33107	0.542194	1.68306	-7.6044	-4.64801	-0.477714	-1.18837	1	-	-		-	-	-	-	-	-
chr8:87368025..87368044,-	87368031	p2@AK183957	[AK183957]	AK183957			AK183957	0	30.1537	772.03	8.2992	274.359	389.165			0	20.2281	114.836	0	1.40386	172.385	1474.01	308.854	1782.86		-0.987356	3.16456		0.583967		10.6487	8.08284	6.23772	8.44534	-4.41097	0.362503	-0.255676	0.362503	1	-	-		-	-	-	-	-	-
chr2:13504089..13504169,+	13504102	p2@AK190963,p2@AK197314,p2@AK204707,p2@AK204959	[AK190963, AK197314, AK204707, AK204959]	AK190963, AK197314, AK204707, AK204959	AK190963		AK190963	0	13.7062	462.32	44.2624	62.5121	57.4178			0	0	175.444	5.55933	29.4811	25.1395	640.219	235.624	875.843	6.48422	-2.99837	2.14911		-2.77868	5.90598	9.89641	8.45898	1.42783	3.18536	-8.46858	-5.27361	-1.53278	-1.53583	2	-	-		-	-	-	-	-	-
chr4:128670536..128670578,+	128670547	p1@Ak2	[Ak2]	Ak2			Ak2	78.8783	1025.22	1036.85	99.5904	731.045	837.874			101.4	794.847	653.929	88.9493	529.257	673.38	3809.47	2841.76	6651.23	0.334486	-0.307242	-0.487626	-0.188012	0.0422539	-0.586254	4.69956	3.83011	3.97085	3.74959	-0.728705	-0.0805194	-0.3596	-0.263195	2	ENSMUST00000030583|ENSMUST00000102604	40|40	40	>1|CTAGACCTGTGAGGTGTGCGGCTGGCTGTTGGAGTGAAGCTTTGGAAGAC|>2|CTAGACCTGTGAGGTGTGCGGCTGGCTGTTGGAGTGAAGCTTTGGAAGAC|	-	|	128670587|128670587	-	-
chr4:128670492..128670534,+	128670497	p2@Ak2	[Ak2]	Ak2			Ak2	33.0188	345.396	403.969	77.4592	493.151	414.684			43.602	284.384	293.471	63.0057	175.483	366.319	1767.68	1226.26	2993.94	1.21775	0.0377215	0.513152	0.526043	0.319394	-0.694937	4.48359	3.71304	3.54243	3.09414	-0.941154	-0.618901	0.332488	-0.0391456	2	ENSMUST00000030583|ENSMUST00000102604	90|90	90	>1|GCGAGCGACCAGTGTGAGCCCGGAGTAGGATGTACGCTGGCCTGGAAGCGCTAGACCTGTGAGGTGTGCGGCTGGCTGTTGGAGTGAAGCTTTGGAAGAC|>2|GCGAGCGACCAGTGTGAGCCCGGAGTAGGATGTACGCTGGCCTGGAAGCGCTAGACCTGTGAGGTGTGCGGCTGGCTGTTGGAGTGAAGCTTTGGAAGAC|	-	|	128670587|128670587	-	-
chr10:86156842..86156870,-	86156862	p2@AK207042	[AK207042]	AK207042			AK207042	0	0	184.03	2.7664	126.761	195.646			0	0	220.103	0	18.2502	86.1926	509.203	324.546	833.749		0.0880682	7.99164		-1.34747		8.52771	8.78531	6.62727	7.71346	-1.90044	-1.07185	0.819566	-1.07185	2	-	-		-	-	-	-	-	-
chr13:3548132..3548172,+	3548138	p1@AK218312	[AK218312]	AK218312			AK218312	12.8407	145.286	228.916	35.9632	76.4037	36.1519			1.014	19.0382	149.925	25.9435	99.6744	66.4402	535.561	362.036	897.597	1.45061	-2.646	-0.922725	4.12648	-1.1681	2.35814	4.81184	6.80647	1.63252	2.65553	-3.17932	-4.15094	-1.37886	0.175712	1	-	-		-	-	-	-	-	-
chr11:88725848..88725905,-	88725865	p1@Akap1	[Akap1]	Akap1			Akap1	27.5157	32.8949	394.992	5.5328	95.5046	263.696			17.238	45.2158	137.166	9.26555	12.6348	44.892	820.136	266.412	1086.55	-2.21534	-0.582037	1.52348	-0.86107	-1.60066	-1.7993	3.93461	3.36599	5.89783	2.57095	1.96322	-0.795048	-0.319905	-1.57235	1	ENSMUST00000018572	187	187	>1|GCGCGTCCTCAGTATTTAATGTCTCTGTGTTCGCCCGGCCTGGGCTAGCACGTGGGGGAGCGGCCGAAGCGCCGTGCAGCGCTGCGGGGCAGGGCCGCTGGACTAGGTGGGGGGCCAGGGGGCGGTGGCGGGAGGATTGAGTGCCTAGACGGTCGCCCAGGAGCAGGTGTAGCTACTTCACATCGACTGACTCCAAG|	-	-	88693068	-	-
chr11:88725823..88725841,-	88725832	p2@Akap1	[Akap1]	Akap1			Akap1	5.50314	65.7898	368.061	11.0656	67.7215	165.874			6.084	84.4822	271.141	5.55933	23.8657	50.279	684.014	441.412	1125.43		-1.14748	0.0414388		-2.4194	-1.80231	6.177	5.75727	4.33918	3.62281	-1.83782	-2.13446	-0.843296	-2.17507	1	ENSMUST00000018572	154	154	>1|CCCGGCCTGGGCTAGCACGTGGGGGAGCGGCCGAAGCGCCGTGCAGCGCTGCGGGGCAGGGCCGCTGGACTAGGTGGGGGGCCAGGGGGCGGTGGCGGGAGGATTGAGTGCCTAGACGGTCGCCCAGGAGCAGGTGTAGCTACTTCACATCGACTGACTCCAAG|	-	-	88693068	-	-
chr11:61743699..61743745,-	61743720	p1@Akap10	[Akap10]	Akap10			Akap10	64.2033	131.58	803.449	182.582	177.118	316.861			20.28	48.7855	47.8485	7.41244	89.8473	86.1926	1675.79	300.366	1976.16	1.50058	-1.34098	0.427368	-1.393	0.842438	0.874318	3.85387	2.22478	1.43342	4.47973	-2.42046	2.25495	-0.562256	0.647728	2	ENSMUST00000102650|ENSMUST00000108710	143|143	143	>1|CCGGAACTCTAAGCGGGTGGCTTGTTGATAACATGGCGGCAGCAGCTGCCGGGGCATCCCGAGGTGGCGGCAGCGCCCACACCCGGAAGAAGGGGCTGTTTTCGGACTAGTGCAGCGGCTCCTGCGGCCCCGGAAGTCCCGGCCAGCTGCTGA|>2|CCGGAACTCTAAGCGGGTGGCTTGTTGATAACATGGCGGCAGCAGCTGCCGGGGCATCCCGAGGTGGCGGCAGCGCCCACACCCGGAAGAAGGGGCTGTTTTCGGACTAGTGCAGCGGCTCCTGCGGCCCCGGAAGTCCCGGCCAGCTGCTGA|	-	|	61686517|61706839	-	-
chr14:78936569..78936658,-	78936645	p1@Akap11	[Akap11]	Akap11			Akap11	7.33752	82.2373	439.877	11.0656	50.357	240.304			23.322	113.04	172.255	31.5029	65.9816	132.88	831.179	538.981	1370.16		-0.870881	-0.702091	0.425907	-0.373178	-0.772168	6.05921	3.58461	4.65391	2.63912	-1.4053	-0.945493	-0.810231	-0.421101	2	ENSMUST00000123853|ENSMUST00000022593	180|180	180	>1|GTGGGGAGGCGGCGGCGGTGGCGTCGCGGGCTGGGGCGGGCGAGGGGGAGCGCCGCTGCGCTGCGGCTCGCGCCACCGGGCGTTGCGGGCCGTGACGGGAGGCTGACATGCCCGGGAGCTGAGAGGCTGTGCCGCCTGGTGTTGTGTGGATTTACTCTCCAGCTACATTACACACTGCAGTAATACAGTT|>2|GTGGGGAGGCGGCGGCGGTGGCGTCGCGGGCTGGGGCGGGCGAGGGGGAGCGCCGCTGCGCTGCGGCTCGCGCCACCGGGCGTTGCGGGCCGTGACGGGAGGCTGACATGCCCGGGAGCTGAGAGGCTGTGCCGCCTGGTGTTGTGTGGATTTACTCTCCAGCTACATTACACACTGCAGTAATACAGTT|	-	|	78895582|78895582	-	-
chr10:6080166..6080187,-	6080177	p1@Akap12	[Akap12]	Akap12			Akap12	187.107	419.41	947.083	282.173	175.381	438.076			60.84	96.3811	191.394	35.2091	92.655	246.008	2449.23	722.487	3171.72	0.591421	-1.11142	-1.25548	-0.780537	0.361326	-0.0565815	2.86522	2.23255	1.11901	3.24762	-1.74622	1.01507	-0.794298	0.100771	1	ENSMUST00000045730	156	156	>1|CGTCCCCTTCATTCTCAGTCCGGGTGTGTTCTCAGCAGGATCGTGGAGAGCGGGTGCTCCTCACCCCTTAGTCCCTGTGGTCCTGGGCGCACATCTCCTCGCCCCTCTGCTTCTCCGCGGTCCCAGGAAGACGGCTAGCCGGCGAGAGTAGGAAAGCCACTGAGCC|	Inr	-	5988609	-	-
chr4:57858112..57858137,+	57858119	p1@Akap2	[Akap2]	Akap2			Akap2	137.578	134.321	1328.61	196.414	144.125	1860.76			93.288	28.5574	1116.46	40.7684	526.449	1578.4	3801.81	3383.93	7185.74	0.51208	0.485821	0.101275	-1.18437	0.499338	4.18069	3.40579	3.61046	3.34824	5.67288	-0.0575535	2.06242	0.459703	0.792776	6	ENSMUST00000102903|ENSMUST00000107598	170|170	170	>1|CGGCTGAGCCAGTGTGAGCACTGGAATCTGTCTAGAGAAAGAGGCGATTCTGACTGCGGACTCCCGGAGAAGCCTCCCCAGCTTTCTGAGGATGCTAACCAGCTGAGAAGCAAGCAAGACAACTGTGGTGACAGTCGCCTGGAGCCTGCCGCCAGCTCTCTCTCCCCAGATCACAAAAAC|>2|CGGCTGAGCCAGTGTGAGCACTGGAATCTGTCTAGAGAAAGAGGCGATTCTGACTGCGGACTCCCGGAGAAGCCTCCCCAGCTTTCTGAGGATGCTAACCAGCTGAGAAGCAAGCAAGACAACTGTGGTGACAGTCGCCTGGAGCCTGCCGCCAGCTCTCTCTCCCCAGATCACAAAAAC|	-	|	57867544|57867544	-	-
chr4:57858091..57858110,+	57858096	p3@Akap2	[Akap2]	Akap2			Akap2	104.56	68.531	1319.63	149.386	97.2411	1139.85			80.106	24.9877	1119.65	0	275.157	1301.87	2879.2	2801.77	5680.97	0.512653	-0.211207	0.50172	-7.33282	0.217439	3.435	3.72442	3.8285	3.0456	11.6234	-0.678816	7.79495	-0.106487	0.364589	6	ENSMUST00000102903|ENSMUST00000107598	193|193	193	>1|CGAGACTCCTAAGGAATTTGTCCCGGCTGAGCCAGTGTGAGCACTGGAATCTGTCTAGAGAAAGAGGCGATTCTGACTGCGGACTCCCGGAGAAGCCTCCCCAGCTTTCTGAGGATGCTAACCAGCTGAGAAGCAAGCAAGACAACTGTGGTGACAGTCGCCTGGAGCCTGCCGCCAGCTCTCTCTCCCCAGATCACAAAAAC|>2|CGAGACTCCTAAGGAATTTGTCCCGGCTGAGCCAGTGTGAGCACTGGAATCTGTCTAGAGAAAGAGGCGATTCTGACTGCGGACTCCCGGAGAAGCCTCCCCAGCTTTCTGAGGATGCTAACCAGCTGAGAAGCAAGCAAGACAACTGTGGTGACAGTCGCCTGGAGCCTGCCGCCAGCTCTCTCTCCC…	-	|	57867544|57867544	-	-
chr17:32458063..32458149,-	32458082	p1@Akap8	[Akap8]	Akap8			Akap8	75.2096	224.782	686.747	77.4592	425.43	712.406			73.008	126.128	143.546	44.4746	49.1352	154.428	2202.03	590.72	2792.75	0.0422435	0.0528819	0.918885	-0.70879	0.105078	-1.35116	3.59053	1.87791	3.86806	2.18184	0.27753	0.303921	0.300429	-0.465505	1	ENSMUST00000002699	35	35	>1|GAGCGAATCTAAGACAAGGATCTGCTGGCGGGTCGCGTCGCAGAC|	-	-	32442201	-	-
chr5:3928267..3928300,+	3928285	p1@Akap9	[Akap9]	Akap9			Akap9	14.675	109.65	444.366	33.1968	90.2953	106.329			2.028	103.52	159.495	0	36.5005	140.063	798.512	441.607	1240.12	1.15091	-2.05806	-0.278776		-0.186809	-1.49125	5.19146	6.70375	2.54842	8.46812	-2.64303	1.76438	-1.30526	-0.584681	2	ENSMUST00000044492	157	157	>1|GTGTTTACGTGGAGACGAAGATGGCGGCGGTGACCGCGGGGCCCGTGCAGGCCGGCACGAGTCGCCGGTGAGCGCCCAGCGTGTCCCGGGTGGCCACGGAGCTCTGTCCGCCTCTTTCTAAACAGATCTTTCCTCTCCACTGCGTCCCAGCCTACCCTGCAGACGCC|	-	-	3928442	ENSMUST00000143365	157	157
chr4:123427479..123427536,-	123427522	p1@Akirin1	[Akirin1]	Akirin1			Akirin1	23.8469	339.914	682.259	52.5616	104.187	620.962			20.28	19.0382	3.1899	11.1187	54.7507	26.9352	1823.73	135.313	1959.04	1.12393	-0.135708	-1.70121	-0.838752	2.89437	1.49969	5.39246	0.129284	3.77353	2.82245	-1.61893	2.69316	-0.427366	1.11734	1	ENSMUST00000102636	116	116	>1|CAGCGCGGCTGCCGGGTGCCGGAGGCGCCATTGGAGCCGGCTTGGCTTGGGAGCCGTAGCTGAAGAGTTGGATCCAGGGCAGTCCTTGCTGCCGCGTCTGCGTCTGGTCTCTGGCCCTTCCGCGGG|	-	-	123414096	-	-
chr4:34497836..34497911,+	34497860	p1@Akirin2	[Akirin2]	Akirin2			Akirin2	18.3438	79.496	112.214	11.0656	29.5196	219.038			23.322	54.7349	127.596	25.9435	106.694	41.3006	469.677	379.591	849.268	-0.70425	0.96181	-1.41402	0.150621	-1.61563	0.956567	3.35052	2.94014	4.42857	2.48942	1.07805	-0.450723	0.30501	-0.241002	0	-	-		-	-	-	-	-	-
chr4:116324201..116324241,-	116324231	p1@Akr1a1	[Akr1a1]	Akr1a1			Akr1a1	229.298	2373.92	2118.59	616.907	1475.98	1611.95			199.758	878.139	325.37	166.78	537.68	725.455	8426.64	2833.18	11259.8	1.42586	-0.394192	-0.68541	-0.259596	1.15558	-0.707182	4.28925	2.58791	2.32258	2.91724	-1.96667	0.32933	-0.349886	0.0271302	1	ENSMUST00000030455	295	295	>1|GTGCGCATGCACAGTTTCGGGACCCCGGCCCTTCCAGACGTTCGTGGTGGAGTGAGAGGTTCCCAGGGGAGGAATGTGCAAAGTCCCAGCTTTGGCTTCTACTCCCTCTTCTACTTCGCAGGACAGTGGGGGTCTCCTCCGTCCTGCGCGTAGTTCTGGGAGCCGGGCCCTCGCTCCTCCCTGGGGTGGGGCTGCCGCTTCTCCGCCGGACTTAAGTCGGGCCCTGTTGCCTCAGTACTGGAGTGCAGAGCTGAATTCGGGCCACTTTGTCTTTTCCACAGCCTGTGCTCACTGCCAAGGGGACA|	-	-	116309208	-	-
chr4:116323994..116324014,-	116324000	p3@Akr1a1	[Akr1a1]	Akr1a1			Akr1a1	18.3438	106.908	386.015	11.0656	204.901	525.266			10.14	20.2281	66.9879	0	40.7121	141.859	1252.5	279.927	1532.43	-0.70425	0.443898	0.935335		1.07683	0.991476	4.71066	3.04334	5.9813	8.51626	1.27064	5.47292	0.535412	0.903669	1	-	-		-	-	-	-	ENSMUST00000030455	64	64
chr4:116324040..116324051,-	116324045	p4@Akr1a1	[Akr1a1]	Akr1a1			Akr1a1	3.66876	41.1186	193.007	35.9632	43.4112	214.785			0	13.0888	15.9495	22.2373	2.80773	70.0315	531.954	124.115	656.069	3.12875	0.153859	0.0773596		2.10022		5.8146	5.88451	2.82675	1.68952	-2.98786	-4.19499	0.306301	1.69407	1	-	-		-	-	-	-	ENSMUST00000030455	109	109
chr6:34334230..34334335,+	34334271	p1@Akr1b10	[Akr1b10]	Akr1b10			Akr1b10	12.8407	41.1186	215.45	44.2624	29.5196	61.6709			2.028	24.9877	172.255	3.70622	15.4425	52.0747	404.862	270.494	675.356	1.74646	-1.79639	-0.471324		-1.71628	-0.676922	4.26825	6.28948	1.03449	4.0153	-3.23377	-2.27418	-0.989368	-1.47783	2	ENSMUST00000038383|ENSMUST00000115051	70|70	70	>1|AGGACACGGAACCAGTTGCCAGACTCCTAATTTAGGCAAAGGCTCCCGTCTGTTCCCTTTGAACCGTTTCTGCAGCAACC|>2|AGGACACGGAACCAGTTGCCAGACTCCTAATTTAGGCAAAGGCTCCCGTCTGTTCCCTTTGAACCGTTTCTGCAGCAACC|	-	|	34334341|34334341	-	-
chr6:34267442..34267499,-	34267489	p1@Akr1b3,p1@Gm6644	[Akr1b3, Gm6644]	Akr1b3, Gm6644	Akr1b3		Akr1b3	5.50314	65.7898	368.061	38.7296	86.8224	225.418			0	34.5068	108.457	1.85311	32.2889	172.385	790.323	349.491	1139.81	2.70815	-0.706103	0.397565		0.666062	-0.0944293	6.177	8.16454	2.99495	6.44614	-3.18205	-1.7184	-0.323622	0.529138	2	ENSMUST00000102980|ENSMUST00000154655	85|85	85	>1|GGCGTTCTTTCTACAGGCCGTTGGGGCTATTTAAAGGTGCGCGCCCGAGCCAGCGCTGCACATTTGCCGGTCCGGGTTTGTAACGTGCAGCGATC|>2|GGCGTTCTTTCTACAGGCCGTTGGGGCTATTTAAAGGTGCGCGCCCGAGCCAGCGCTGCACATTTGCCGGTCCGGGTTTGTAACGTGCAGCGATC|	-	|	34254296|34260604	-	-
chr6:34304155..34304199,+	34304191	p1@Akr1b8	[Akr1b8]	Akr1b8			Akr1b8	11.0063	109.65	807.938	135.554	93.7682	174.38			12.168	10.709	491.245	37.0622	47.7314	314.244	1332.3	913.159	2245.45	3.56368	-2.20877	-0.224622	1.56809	-0.64373	2.10531	6.31814	5.30973	0.981542	3.27053	-5.3366	-2.0392	-1.20075	-0.365181	1	ENSMUST00000038406	39	39	>1|ATTAACAAGGACACAGACATCTGCTCTCAGCAAGATTTTGGCAGCAACC|	-	-	34304230	-	-
chr6:34304125..34304151,+	34304145	p2@Akr1b8	[Akr1b8]	Akr1b8			Akr1b8	22.0126	112.391	763.053	113.422	151.071	153.114			9.126	35.6967	456.156	7.41244	51.943	251.395	1315.06	811.729	2126.79	2.33925	-2.31342	0.425064		-0.858283	0.534891	5.28204	5.67661	1.41927	5.26304	-3.86277	-0.413574	-1.10277	-0.688111	1	ENSMUST00000038406	85	85	>1|AAGAGCCGGCCTCTTCATCCAGGACGTTAAAGCCTCCATCTGTCTCATTAACAAGGACACAGACATCTGCTCTCAGCAAGATTTTGGCAGCAACC|	TOP	-	34304230	-	-
chr13:4608368..4608435,-	4608402	p1@Akr1e1	[Akr1e1]	Akr1e1			Akr1e1	31.1845	158.992	336.641	88.5248	265.677	212.658			11.154	61.8743	165.875	57.4464	87.0396	141.859	1093.68	525.248	1618.92	1.49043	-0.661425	0.738899	2.31389	-0.224906	0.488984	3.96888	4.29171	2.42725	1.98506	-1.54163	-2.30665	0.105592	0.260828	2	ENSMUST00000110691|ENSMUST00000091848	34|34	34	>1|GCTAAAGTGCAGGAAGAGGCTGAGCCTTTGAGCAAAGGGGAACC|>2|GCTAAAGTGCAGGAAGAGGCTGAGCCTTTGAGCAAAGGGGAACC|	-	|	4592501|4592501	-	-
chr4:138866647..138866708,+	138866669	p1@Akr7a5	[Akr7a5]	Akr7a5			Akr7a5	29.3501	95.9435	166.076	52.5616	81.6131	170.127			8.112	19.0382	200.964	7.41244	54.7507	68.2358	595.671	358.513	954.184	0.829933	0.034662	-0.232072		-1.55139	1.49969	3.13662	4.6783	2.24906	3.96409	-0.887563	-0.714212	0.0625452	-0.80446	1	ENSMUST00000073787	0	0	>1||	-	-	138866669	-	-
chr7:52104586..52104665,+	52104619	p1@Akt1s1	[Akt1s1]	Akt1s1			Akt1s1	36.6876	315.243	179.542	91.2912	284.777	193.519			46.644	247.497	54.2283	38.9153	88.4434	102.354	1101.06	578.082	1679.14	1.30353	0.107867	-0.146384	-0.258318	0.910236	-1.47936	3.73536	2.68048	2.38299	2.27899	-1.35238	-0.401491	0.0998334	-0.599721	2	ENSMUST00000054343	106	106	>1|AGGACAAACCAGAGCGGCTTGGTGGAAGCCATGTTAATGCGGGGCACTACCATCTCTTTGCGGGGCACGACGGCGGGGTGCTGGAAAAGCGAAACGGAGAGAGGAAAAGGGCTCGG|	-	-	52107947	-	-
chr7:52105319..52105396,+	52105332	p2@Akt1s1	[Akt1s1]	Akt1s1			Akt1s1	25.6813	213.817	354.595	121.722	133.707	250.937			10.14	36.8866	159.495	16.678	70.1932	89.784	1100.46	383.177	1483.63	2.22289	-0.498008	-0.675291	0.691063	-0.825484	0.919051	4.4416	4.20976	1.6559	3.22374	-2.7857	-0.986023	-0.230301	-0.224767	6	ENSMUST00000141311|ENSMUST00000107880	300|341	320.5	>1|CATGCCTTTTGAGGGCGGCGACGGCGCCTGGCCGGCCATGCTGGCTACGGGCACGTGAGTGGAGGCGGCGTTGTGAGCTGGGGTTTGGGGAGGGTCTGGCCTTCCTGAGGTTGAGGGGCAGTGGGAGGGCGAGCCCCCGTGGGAAGGGTATGGACTGCATAGGTCAGGGGGGCAGTGATCGTCCTGCGACTCCTGGCCGACTGCTGAAAGAGCTCACGCTCAACCCCATGTGTCTGACTCGCGACGAAGTGTAGACGAGCTTCACTGCGGGGGTGCCGACGGGCTGGAACCCTCACGCTGGCGGTGAACC|>2|CATGCCTTTTGAGGGCGGCGACGGCGCCTGGCCGGCCATGCTGGCTACGGGCACGTGAGTGGAGGCGGCGTTGTGAGCTGGG…	-	|	52105632|52107947	-	-
chr7:28376724..28376797,+	28376764	p1@Akt2	[Akt2]	Akt2			Akt2	77.044	156.251	480.274	52.5616	86.8224	412.557			7.098	34.5068	185.014	5.55933	35.0966	102.354	1265.51	369.629	1635.14	-0.547346	-0.219018	-0.844049		-0.850935	0.0241039	3.03826	4.85588	3.23584	4.50885	0.197577	-0.34703	-0.370242	-0.6623	2	ENSMUST00000167435	219	219	>1|GCCTGACTCCGAGAAGGNNNNNNNNNNNNNNNNNNNNNNNNNNNNNNNNNNNNNAGTTCATAAATAAGGAGCGGGAACGAGCTCAGCGTGGCGATGGGCGGGGGTAGAGCCCGGCCGGAGAGGCTGGGCGGCCGCCGGTGACAGACGATACTGTATCCGAGGAGCCTCCTGCATGTCCTGCTGCCCTGAGCTCACTCAAGCTAGGTGACAGCGTGTGAATGCTGCCACC|	-	-	28393726	ENSMUST00000108344	219	219
chr8:93657848..93657921,-	93657890	p1@Aktip	[Aktip]	Aktip			Aktip	56.8658	381.033	332.152	118.955	710.207	414.684			25.35	435.5	140.356	70.4182	405.717	184.955	2013.9	1262.3	3276.19	1.05821	0.319736	0.897449	1.45599	0.396853	-0.102078	3.63702	4.47872	3.23588	3.05935	-0.40114	-1.41937	0.691426	0.13688	4	ENSMUST00000120213|ENSMUST00000109609|ENSMUST00000125257	244|159|163	188.667	>1|TCTGCGGGAGAGGAGCGGCAGGGGCCGGGCTGCAGGACAGCCGGAGATGCTGTTGGCCCGCGGTGGCGCTCGGCCCCCAGCGCTCCGCACCGAGGGCATCCAGNNNNNNNNNNNNNNNNNNNNNNNNNNNNNNNNNNNNNNNNNNNNNNNNNNNNNNNNNNNNNNNNNNNNNNNNNNNNNNNNNGCAGTGTGAATGCTGAGGACAGAAGAGTTTGATGACACAGCGCTGAAGTTCTTTGTGTGGAGCACACGTA|>2|TCTGCGGGAGAGGAGCGGCAGGGGCCGGGCTGCAGGACAGCCGGAGATGCTGTTGGCCCGCGGTGGCGCTCGGCCCCCAGCGCTCCGCACCGAGGGCATCCAGTGTGAATGCTGAGGACAGAAGAGTTTGATGACACA…	-	||	93648469|93648469|93648529	-	-
chr4:62181088..62181113,-	62181106	p2@Alad	[Alad]	Alad			Alad	5.50314	8.22373	98.748	24.8976	45.1476	370.026			0	13.0888	22.3293	0	39.3082	59.2574	552.546	133.984	686.529	2.0809	1.90046	2.38752		1.38823	1.55065	4.1621	6.16664	4.03269	7.63031	-0.12941	1.46367	1.96337	1.46367	0	-	-		-	-	-	-	-	-
chr4:62180919..62181001,-	62180929	p1@Alad	[Alad]	Alad			Alad	251.31	413.928	1974.96	533.915	942.891	5914.03			176.436	355.777	3655.63	33.356	1111.86	2479.83	10031	7812.89	17843.9	1.08563	1.58208	1.18674	-2.38575	-0.559781	1.64255	3.24623	4.50299	3.68163	6.72931	0.435401	2.22632	1.48492	-0.208178	2	ENSMUST00000107444|ENSMUST00000030090	176|111	143.5	>1|CGCGGTGTCCAGAGCCCGGCTCGGAGCGGCGGCGAGCAGCGTCCTTGGTACGTGAGCAGGCGCCGGCCTCTGGGAAGTGGCGGGTTGAAGGGGGACGGGACCCCAGAACAAGAGCTGAGGCTGCAGCAGACACCCAGGAGCCGCCACTCCATCCAGCAGACTTCTCTGTGTTCCACTGCCCCGACC|>2|CGCGGTGTCCAGAGCCCGGCTCGGAGCGGCGGCGAGCAGCGTCCTTGAGCTGAGGCTGCAGCAGACACCCAGGAGCCGCCACTCCATCCAGCAGACTTCTCTGTGTTCCACTGCCCCGACC|	-	|	62170282|62170282	-	-
chr9:106150191..106150205,-	106150197	p1@Alas1	[Alas1]	Alas1			Alas1	97.2221	21.9299	394.992	49.7952	126.761	474.228			29.406	40.4563	306.23	3.70622	18.2502	175.977	1164.93	574.026	1738.95	-0.958265	0.263454	2.50429	-2.82984	-0.797494	-1.12718	2.09475	3.5372	3.58005	5.53278	1.4853	1.99558	0.339712	-0.924352	2	ENSMUST00000074082	104	104	>1|TCGCGGCCTTAGGCTGCTCGTGAACAAGGGCACTGGTCGGTTTAGCGTCCTCCGCTCGAGTGCCTACCGCCGCTTCGTCGAGAGCCCGCGCAGGATCCAAGACACTTTGCAAAC|	-	-	106136367	ENSMUST00000141118	104	104
chr9:106150234..106150243,-	106150238	p2@Alas1	[Alas1]	Alas1			Alas1	31.1845	65.7898	471.297	47.0288	194.482	663.494			38.532	65.444	143.546	37.0622	87.0396	420.189	1473.28	791.812	2265.09	0.585027	0.493004	1.55648	-0.0553759	1.54623	0.408695	4.08465	2.42415	4.1749	3.7567	0.0902538	1.33256	0.670874	1.13524	2	ENSMUST00000074082	145	145	>1|CGCGGCGGTCACTCCGGCTCTATATTTAGGGCCGCCAGCGATCGCGGCCTTAGGCTGCTCGTGAACAAGGGCACTGGTCGGTTTAGCGTCCTCCGCTCGAGTGCCTACCGCCGCTTCGTCGAGAGCCCGCGCAGGATCCAAGACACTTTGCAAAC|	InrAC	-	106136367	ENSMUST00000141118	145	145
chr7:52409889..52409942,-	52409904	p1@Aldh16a1	[Aldh16a1]	Aldh16a1			Aldh16a1	14.675	16.4475	94.2594	11.0656	31.2561	278.583			10.14	21.418	44.6586	14.8249	95.4627	132.88	446.286	319.385	765.671	-0.39186	1.55835	0.905964		1.56247	2.13036	2.87347	2.64552	4.74593	3.90041	1.87246	1.25489	1.35232	1.66731	2	ENSMUST00000007977|ENSMUST00000107815	54|54	54	>1|CGGACCTCCAAGTTCCTCTAGGTAGACCGTCCAGCAATCCCTCGCGGAAGGCTCCGGGAGAGCG|>2|CGGACCTCCAAGTTCCTCTAGGTAGACCGTCCAGCAATCCCTCGCGGAAGGCTCCGGGAGAGCG|	-	|	52397310|52398131	-	-
chr19:40662828..40662861,-	40662834	p2@Aldh18a1	[Aldh18a1]	Aldh18a1			Aldh18a1	11.0063	27.4124	219.939	24.8976	39.9383	546.532			0	4.75956	105.267	11.1187	35.0966	237.03	869.725	393.271	1263	1.14227	1.31125	0.534815		1.16722	2.75873	4.42898	7.78825	4.53052	4.55241	0.101544	-3.23584	1.24106	1.36021	5	ENSMUST00000176939|ENSMUST00000176955|ENSMUST00000149476|ENSMUST00000175932	130|66|64|281	135.25	>1|CGGTCGCCGCGAAGAGTGGTCCAGGGCTGGGGTCGGCGGCCAGCAGGTACTCCTGAGCACTAACACATACACACAAGGATTTGGACAATAGCCACCAGTCTTAGCAGAACAGGTGTTTGGATTTGTGACAACATCTCAAC|>2|CGGTCGCCGCGAAGAGTGGTCCAGGGCTGGGGTCGGCGGCCAGCAGGTCTCGGTGCTGCAGAATCAGGGCCGAGAG|>3|CGGTCGCCGCGAAGAGTGGTCCAGGGCTGGGGTCGGCGGCCAGCAGGTGTTTGGATTTGTGACAACATCTCAAC|>4|CGGTCGCCGCGAAGAGTGGTCCAGGGCTGGGGTCGGCGGCCAGCAGATCGTGTCCAGCCCTCAGCTATTAGACATGTTCGTTCTTGGAGCAACA…	-	|||	40625637|40648833|40652104|40652147	ENSMUST00000025979	130	130
chr19:40662864..40662916,-	40662871	p1@Aldh18a1	[Aldh18a1]	Aldh18a1			Aldh18a1	11.0063	65.7898	394.992	69.16	131.97	891.039			12.168	122.559	341.319	42.6215	138.983	646.445	1563.96	1304.09	2868.05	2.59791	1.17265	0.998807	1.76722	0.920409	0.180738	5.32515	5.19604	3.87705	4.18792	-1.44811	-1.00812	1.21012	0.797971	5	ENSMUST00000176939|ENSMUST00000025979|ENSMUST00000176955|ENSMUST00000149476|ENSMUST00000175932	167|167|103|101|318	171.2	>1|AGCTGGACGTAGACGGAAGAAAAGGCGGAGGAGAGGGCGGTCGCCGCGAAGAGTGGTCCAGGGCTGGGGTCGGCGGCCAGCAGGTACTCCTGAGCACTAACACATACACACAAGGATTTGGACAATAGCCACCAGTCTTAGCAGAACAGGTGTTTGGATTTGTGACAACATCTCAAC|>2|AGCTGGACGTAGACGGAAGAAAAGGCGGAGGAGAGGGCGGTCGCCGCGAAGAGTGGTCCAGGGCTGGGGTCGGCGGCCAGCAGGTACTCCTGAGCACTAACACATACACACAAGGATTTGGACAATAGCCACCAGTCTTAGCAGAACAGGTGTTTGGATTTGTGACAACATCTCAAC|>3|AGCTGGACGTAGACGGAAGAAAAGGCGGAGGAGA…	-	||||	40625637|40625637|40648833|40652104|40652147	-	-
chr10:82996811..82996872,-	82996846	p1@Aldh1l2	[Aldh1l2]	Aldh1l2			Aldh1l2	9.1719	5.48248	116.702	27.664	93.7682	486.988			0	8.32923	25.5192	3.70622	65.9816	190.342	739.776	293.878	1033.65	1.54198	2.05637	3.97795		2.87473	2.9126	3.66501	6.10217	4.36725	5.93211	0.702238	-0.170062	2.20728	2.92313	1	ENSMUST00000020497	88	88	>1|AGAGCTGGACAGAGCTGAAGCGAAGCACTCAACCCTCTGCAGCCCTGGTACCTACCCACTCCCGCCGCCCGCCTGGCAATCGCTCGCTCCTCTACATC|	-	-	82953323	-	-
chr5:122043561..122043612,-	122043594	p1@Aldh2	[Aldh2]	Aldh2			Aldh2	84.3815	175.439	1768.49	193.648	342.08	3568.41			34.476	57.1147	1425.89	20.3842	207.772	1623.29	6132.44	3368.93	9501.37	1.19364	1.01256	0.961363	-0.743953	0.187006	1.85396	4.51775	5.4065	4.3323	6.45452	-0.185446	1.04803	1.01662	0.286897	3	ENSMUST00000129753|ENSMUST00000152945	105|105	105	>1|CTTGTTCTTCAACGCTGCAGTCGCCCTCCGATCGGCAAGGCTTCTCTCGGCTCCGTTCGGCTCGGCTCGCCCATNNNNNNNNNNNNNNNNNNNNNNNNNNNNNNNNNNNNNNNNC|>2|CTTGTTCTTCAACGCTGCAGTCGCCCTCCGATCGGCAAGGCTTCTCTCGGCTCCGTTCGGCTCGGCTCGCCCATNNNNNNNNNNNNNNNNNNNNNNNNNNNNNNNNNNNNNNNNC|	-	|	122020608|122026465	ENSMUST00000031411	105	105
chr18:56721869..56721908,-	56721880	p1@Aldh7a1	[Aldh7a1]	Aldh7a1			Aldh7a1	16.5094	112.391	538.625	19.3648	170.172	521.013			17.238	24.9877	255.192	35.2091	7.01932	262.169	1378.08	601.815	1979.89	0.22388	-0.0479171	0.596296	1.00945	0.0388405	-1.76113	5.2594	3.98401	5.12183	2.91693	-0.137566	-1.06708	0.0900472	0.0334115	5	ENSMUST00000066208|ENSMUST00000170309|ENSMUST00000171844	3|1|30	11.3333	>1|TGCTGAGCTCAGT|>2|TGCTGAGCTCA|>3|TGCTGAGCTCAGTATGTGGCGTGTGCCCCGCAGGCTCTGT|	-	||	56686606|56696901|56710020	ENSMUST00000172734	3	3
chr18:56721915..56721937,-	56721926	p3@Aldh7a1	[Aldh7a1]	Aldh7a1			Aldh7a1	3.66876	32.8949	255.847	8.2992	50.357	240.304			0	42.836	105.267	5.55933	4.21159	134.676	591.371	292.55	883.921		-0.0902387	0.606818		0.353954	-3.20128	6.11651	8.21532	5.0483	4.5238	-1.06821	-3.69152	0.0319035	-0.0359359	5	ENSMUST00000172734|ENSMUST00000066208|ENSMUST00000170309|ENSMUST00000171844	49|49|47|76	55.25	>1|GCGGAGCTGTATTTCCGGGGCTGCCCTGGCGGAGGGGCTTCTTGCGTGCTGAGCTCAGT|>2|GCGGAGCTGTATTTCCGGGGCTGCCCTGGCGGAGGGGCTTCTTGCGTGCTGAGCTCAGT|>3|GCGGAGCTGTATTTCCGGGGCTGCCCTGGCGGAGGGGCTTCTTGCGTGCTGAGCTCA|>4|GCGGAGCTGTATTTCCGGGGCTGCCCTGGCGGAGGGGCTTCTTGCGTGCTGAGCTCAGTATGTGGCGTGTGCCCCGCAGGCTCTGT|	-	|||	56686606|56686606|56696901|56710020	-	-
chr7:133942648..133942669,-	133942654	p3@Aldoa,p3@Aldoart1	[Aldoa, Aldoart1]	Aldoa, Aldoart1	Aldoa		Aldoa	38.522	101.426	1144.58	141.086	255.258	993.115			74.022	78.5327	1955.41	63.0057	197.945	1104.34	2673.99	3473.26	6147.24	1.85932	-0.204688	1.32726	-0.23078	-0.823997	1.32822	4.99746	4.77082	3.14087	4.35857	-1.85659	-0.412251	0.113244	-0.626452	6	ENSMUST00000087566	109	109	>1|TGGAACGCGCAGCAGAACGAGGTTCTGGTGACCCTAGCCGCGTTCGCTCCTTAGTCCTTTCGCCTACCCACCGGCGTACCAGGCAGACCCACCCCGTCCTGTGCCAGGCAAGGTGACCC|	-	-	133938932	ENSMUST00000032934	118	118
chr7:133943868..133943944,-	133943878	p4@Aldoa,p4@Aldoart1	[Aldoa, Aldoart1]	Aldoa, Aldoart1	Aldoa		Aldoa	9.1719	30.1537	175.053	30.4304	36.4654	276.456			6.084	4.75956	277.521	9.26555	80.0203	190.342	557.731	567.993	1125.72	1.67715	0.657748	0.270116		-0.542816	3.93634	4.41065	5.42458	3.34101	4.79371	-1.06964	-0.630861	0.678264	-0.0443091	2	ENSMUST00000106348	99	99	>1|CTTGTTCTGCCTTACAGATCCTGGACCTGAGACTGATTTCTTGACTAATTTCACTGTATTTCCAAGGAAGAGGTTCCTCTAAAGACCGGAAAGCACTGCCACCGGCACC|	-	-	133938932	-	-
chr7:133943551..133943568,-	133943559	p1@Aldoa,p1@Aldoart1	[Aldoa, Aldoart1]	Aldoa, Aldoart1	Aldoa		Aldoa	12.8407	46.6011	430.9	94.0576	260.467	261.57			36.504	29.7473	290.281	64.8589	77.2125	222.664	1106.44	721.268	1827.7	2.82536	-0.719076	2.47004	0.820701	-0.381826	1.36134	5.16311	3.1147	2.46627	2.20032	-2.69684	-0.914379	0.329064	0.0327738	4	ENSMUST00000151137|ENSMUST00000133514	66|57	61.5	>1|TGCCGGGCTCACTCTCTGCTGACCGGGCTCTGCGGCTTCTGTCACTGCGCCACAGGAAAGCACTGCCACCGGCACC|>2|TGCCGGGCTCACTCTCTGCTGACCGGGCTCTGCGGCTTCTGTCACTGCGCCACAGGCAAGGTGACCC|	InrAC|InrAC	|	133939552|133940231	-	-
chr7:133942677..133942705,-	133942698	p2@Aldoa,p2@Aldoart1	[Aldoa, Aldoart1]	Aldoa, Aldoart1	Aldoa		Aldoa	412.736	646.933	5076.54	1394.27	1248.51	3228.15			308.256	315.321	5815.19	192.723	1789.93	3269.93	12007.1	11691.3	23698.5	1.75499	-0.653056	0.947977	-0.676197	-0.830468	2.50313	3.79198	4.31159	1.68256	4.7109	-2.10942	0.399313	-0.0637549	-0.293731	6	ENSMUST00000032934|ENSMUST00000087566	162|153	157.5	>1|CGCCTCCCGTCCCCCCCAACCCAGCTGAATAGGCTGCGTTCTCTTGGAACGCGCAGCAGAACGAGGTTCTGGTGACCCTAGCCGCGTTCGCTCCTTAGTCCTTTCGCCTACCCACCGGCGTACCAGGCAGACCCACCCCGTCCTGTGCCAGGAAAGCACTGCCACCGGCACC|>2|CGCCTCCCGTCCCCCCCAACCCAGCTGAATAGGCTGCGTTCTCTTGGAACGCGCAGCAGAACGAGGTTCTGGTGACCCTAGCCGCGTTCGCTCCTTAGTCCTTTCGCCTACCCACCGGCGTACCAGGCAGACCCACCCCGTCCTGTGCCAGGCAAGGTGACCC|	TOP|TOP	|	133938932|133938932	-	-
chr16:5233708..5233746,+	5233718	p1@Alg1	[Alg1]	Alg1			Alg1	16.5094	32.8949	134.656	19.3648	36.4654	63.7975			21.294	74.9631	9.5697	1.85311	22.4618	70.0315	303.688	200.173	503.862	0.22388	-1.07179	0.146548		2.80825	-1.71653	3.3045	1.96409	2.34268	5.30449	-0.961816	3.3404	-0.619526	-0.164839	2	ENSMUST00000100196|ENSMUST00000049207	24|24	24	>1|GGCCCGGTCACGTGCTCGGCGCCGGCCGGCCAAG|>2|GGCCCGGTCACGTGCTCGGCGCCGGCCGGCCAAG|	-	|	5233742|5233742	-	-
chr8:23171184..23171204,+	23171196	p1@Alg11	[Alg11]	Alg11			Alg11	55.0314	745.618	1292.7	201.947	1232.88	1116.46			61.854	358.157	226.483	94.5086	370.62	359.136	4644.63	1470.76	6115.39	1.86617	-0.211373	0.72514	0.607576	0.663954	0.0492819	5.19829	3.23023	3.53694	2.94227	-1.66134	-0.287955	0.285347	0.350231	3	ENSMUST00000072572|ENSMUST00000110737|ENSMUST00000131624	2|2|15	6.33333	>1|GGGTGGGATAAG|>2|GGGTGGGATAAG|>3|GGGTGGGATAAGATGGCGGCGGACA|	-	||	23171198|23171198|23171211	-	-
chrX:140752534..140752577,+	140752565	p1@Alg13	[Alg13]	Alg13			Alg13	23.8469	252.194	354.595	16.5984	121.551	125.468			1.014	237.978	89.3172	1.85311	60.3662	66.4402	894.254	456.969	1351.22	-0.509879	-1.49514	-1.0499		-0.42412	-1.97014	4.64057	7.75829	3.85561	5.75759	-0.784961	-2.00069	-1.25677	-1.3481	3	ENSMUST00000123710|ENSMUST00000149330	378|226	302	>1|CCGCAATTCCGAATCTGGAACCCGCGCGATGAAGAGAGCGTTTGTGACTGTCGGGACCACCAGTTTCGACGAGCTCGTCGCACGGGTGGTCGCTAACGACTGCGTTCAGTCCTTGAACAGGTAAAGAGGGTCTTTCCCTCTGGGTGGCTCAGGCGGTGACCCCCTACTGCTTTGTTGTGACTCAGCTCTTCTGGTGGGACCTAAACAAGCTCCTCCCTTGGTTCCCACCTCGTTCTCCTCCACTCCTCCTCCTCCTTCAAGGTATAAGGATTCTTTGAAAGAAGACCTTCAGCAAGCTGATCTTGTCATTAGCCACGCAGGTGCAGGAAGCTGTTTGGAGAGTCTGGAGAAAGGCAAACCACTTGTGGTAGTTGTAAATGAAAAGTTA|>2|CCGC…	-	|	140756622|140756622	ENSMUST00000070801	18	18
chr3:120994643..120994735,+	120994692	p1@Alg14	[Alg14]	Alg14			Alg14	31.1845	178.181	296.244	2.7664	85.0859	40.4051			12.168	90.4316	25.5192	0	101.078	25.1395	633.867	254.337	888.203	-3.278	-2.85887	-1.06194		-0.0212073	0.159737	3.90585	3.20046	5.26948	7.98547	1.36362	4.78501	-1.97479	-0.0214836	2	ENSMUST00000039442|ENSMUST00000199554	73|73	73	>1|TTTGCTCCCTGTTTGCTCTTAAGCGCGGTGCTTGCAAACTTTAACCGCTGGCGCCAGGTCTACACGCATGCGCCATCCTTTGA|>2|TTTGCTCCCTGTTTGCTCTTAAGCGCGGTGCTTGCAAACTTTAACCGCTGGCGCCAGGTCTACACGCATGCGCCATCCTTTGA|	-	|	120994765|120994765	-	-
chr4:47487155..47487221,-	47487175	p1@Alg2	[Alg2]	Alg2			Alg2	12.8407	98.6847	251.358	13.832	86.8224	301.975			11.154	48.7855	98.8869	0	216.195	308.857	765.513	683.878	1449.39	0.10341	0.264202	-0.183766		1.63814	2.13643	4.71569	3.66838	4.76356	10.0377	0.0478704	6.36931	0.149749	1.72185	1	ENSMUST00000044148	18	18	>1|CGGAGAGCGCAAGCGCGGCTCATCTACC|	-	-	47484430	-	-
chr16:20610814..20610830,-	20610821	p1@Alg3	[Alg3]	Alg3			Alg3	25.6813	52.0836	67.3282	22.1312	119.815	153.114			16.224	20.2281	0	11.1187	18.2502	48.4834	440.153	114.304	554.458	-0.210225	1.17935	1.19413	-0.525476	6.61422	-0.144681	2.19536	0.30967	3.59478	2.53274	1.39942	2.22307	1.02151	1.08432	1	ENSMUST00000045918	11	11	>1|AAAGAGTGGTGCACTGTCAAG|	-	-	20605627	-	-
chr3:54539458..54539508,+	54539480	p1@Alg5	[Alg5]	Alg5			Alg5	31.1845	424.892	668.793	152.152	428.903	672.001			1.014	191.572	334.939	12.9718	286.388	391.458	2377.93	1218.34	3596.27	2.2684	0.00689746	0.0135366		0.224647	0.57884	5.10994	8.44333	2.85102	5.65401	-2.25891	-2.78931	0.155626	0.388742	1	ENSMUST00000044567	25	25	>1|NNNNNACCGCGCTTCCGCAAGTGTGGAGCTGCGGG|	-	-	54539505	-	-
chr7:104520114..104520150,+	104520135	p1@Alg8	[Alg8]	Alg8			Alg8	220.126	161.733	3631.23	896.314	217.056	2694.38			219.024	52.3552	3212.23	31.5029	1549.87	2698.91	7820.84	7763.88	15584.7	2.02321	-0.430436	0.423317	-2.77811	-0.251157	4.87442	4.10384	3.89467	1.6991	7.05287	-2.40474	3.1582	-0.0757648	0.297083	1	ENSMUST00000098300	12	12	>1|CGGAAGTGACGGGACTCCAGGA|	-	-	104520147	-	-
chr12:88784750..88784800,-	88784782	p1@Alkbh1	[Alkbh1]	Alkbh1			Alkbh1	82.5471	183.663	179.542	138.32	107.66	82.9368			52.728	109.47	63.798	66.712	153.021	79.0099	774.669	524.739	1299.41	0.741214	-1.10958	-0.767821	0.336532	0.306361	0.481329	2.13077	1.7069	0.461086	1.79063	-1.66968	0.0837298	-0.437946	0.401833	2	ENSMUST00000162961|ENSMUST00000185301	9|-85	4.5	>1|AACTGTTGGCAGCCTCGAG|>2||	-	|	88769790|88784460	-	-
chr2:93850886..93850921,-	93850910	p1@Alkbh3	[Alkbh3]	Alkbh3			Alkbh3	12.8407	142.545	89.7709	35.9632	145.862	123.342			12.168	35.6967	25.5192	12.9718	73.0009	82.6013	550.323	241.958	792.281	1.45061	0.456167	0.0330725	0.0887504	1.67529	1.0219	4.12528	2.28445	2.88686	3.53448	-1.23842	1.25003	0.315319	1.19432	3	ENSMUST00000111240|ENSMUST00000040005|ENSMUST00000126378	143|143|289	191.667	>1|TTGGTGCCTCACTCTGAAGGTTCCCCGGCGTCCAGACGGCTGATTAGGGTCGTGTCGGGACCTCTGCTCAGGGCCCAGCCAGGTAGCCATCCCTTGGTCTGAATGGGGAATGAAATCTTCTGACATCTCAGAACAGAACGCTTTTTCTTCACC|>2|TTGGTGCCTCACTCTGAAGGTTCCCCGGCGTCCAGACGGCTGATTAGGGTCGTGTCGGGACCTCTGCTCAGGGCCCAGCCAGGTAGCCATCCCTTGGTCTGAATGGGGAATGAAATCTTCTGACATCTCAGAACAGAACGCTTTTTCTTCACC|>3|TTGGTGCCTCACTCTGAAGGTTCCCCGGCGTCCAGACGGCTGATTAGGGTCGTGTCGGGACCTCTGCTCAGGGCCCAGCCAG…	InrAC|InrAC|InrAC	||	93821041|93821041|93836403	-	-
chr11:60351491..60351576,+	60351515	p1@Alkbh5	[Alkbh5]	Alkbh5			Alkbh5	29.3501	137.062	148.122	11.0656	151.071	138.228			24.336	97.571	143.546	44.4746	120.732	68.2358	614.899	498.895	1113.79	-1.36789	-0.0993885	0.139911	0.856679	-1.06739	0.305876	3.25861	3.28221	4.64714	2.07477	1.38853	-1.20744	-0.066394	-0.185013	1	ENSMUST00000044250	409	409	>1|CACGCGCGTCGAGAAGCCCGCTAAGGAGCGGCGCTGTCGGAGGTCGGGCGGGCTGGCGGTGACGTCGTGAGGAGAGCTTTAAAGTGCGGGCCGGGCCGGGCGTCTGAGGGTCCGACCGGGAGTCTGGCGGAGTCTTGGCCGAAGCCCTCCGCGGCATGAGGCGCTGCCGGCGCCTTTTTCCCTCAGGACGCGGAGAAGGTGGAGGAGGAGGAAGCCCCGCTGTAGCTGGTGCTGCATGACCGACCGCGGCTGAGGTTCGACCCCTTCCCGGCCCCTCTACGCCTACCCCTTTGGTCCCTTGAGCCACGCATGGGGGCCTGGCACTGAGGACCCTCGCTNNNNNNNNNNNNNNNNNNNNNNNNNNCTGAGAGCCATGCCGGACCGCCGCGGAGGACC…	-	-	60351924	-	-
chr7:31093791..31093837,+	31093802	p1@Alkbh6	[Alkbh6]	Alkbh6			Alkbh6	12.8407	57.5661	76.3052	71.9264	154.544	91.4431			8.112	63.0642	31.899	0	70.1932	34.1179	464.625	207.386	672.012	2.44069	0.259537	1.41691		0.0955698	0.153358	3.33232	3.47052	1.76692	7.71165	-1.5654	4.24112	1.11301	0.0171136	2	ENSMUST00000060834|ENSMUST00000136887	76|76	76	>1|CAGGGGGGGCGTGCGAGGATGCGCGCGTTGAGTCTGGATATCCGAGAAGACGCTGTAGACGGACGGCGCACAAGGAGTTGGTATCC|>2|CAGGGGGGGCGTGCGAGGATGCGCGCGTTGAGTCTGGATATCCGAGAAGACGCTGTAGACGGACGGCGCACAAGGAGTTGGTATCC|	-	|	31094524|31094524	-	-
chr17:57136755..57136788,+	57136769	p1@Alkbh7	[Alkbh7]	Alkbh7			Alkbh7	22.0126	142.545	166.076	71.9264	213.583	206.279			24.336	197.522	290.281	50.034	325.696	254.987	822.421	1142.86	1965.28	1.68579	0.311906	0.581706	1.02482	-0.186685	0.720082	3.77937	4.29727	2.53704	3.52367	-1.24232	-0.773604	0.572091	0.300194	2	ENSMUST00000074141|ENSMUST00000002737	17|17	17	>1|TCAGCCTGCTGTGGTCAATCCCTGAAG|>2|TCAGCCTGCTGTGGTCAATCCCTGAAG|	-	|	57136786|57136786	-	-
chr9:3335470..3335501,+	3335477	p1@Alkbh8	[Alkbh8]	Alkbh8			Alkbh8	60.5345	243.971	421.923	30.4304	512.252	518.887			47.658	254.636	111.647	35.2091	164.252	156.224	1788	769.626	2557.62	-0.9806	0.29812	1.0686	-0.431484	0.482843	-0.630972	3.44868	2.92908	5.05977	3.1681	1.61109	0.239024	0.546993	-0.218538	1	ENSMUST00000053407	124	124	>1|TGGGAAATGTAGTACTATTGTCTGCAACATGGCGGCGTCCGGTTGAAAGGGTGTCAGAGCATAGGTGGTCAGGCTGCACCGGGGAAGGCTGGCGATTGACAAAGCAGCTGGGAGGTGAACATTTCTGTATTACT|	-	-	3338462	-	-
chr9:3335508..3335531,+	3335522	p2@Alkbh8	[Alkbh8]	Alkbh8			Alkbh8	7.33752	41.1186	125.679	16.5984	152.807	119.089			2.028	97.571	19.1394	16.678	21.058	46.6877	462.63	203.162	665.792		-0.0773933	1.88113		1.26466	-2.18561	4.41588	5.53496	3.99377	1.99018	-0.422105	-3.54478	0.726696	-0.489611	1	ENSMUST00000053407	79	79	>1|AAAGGGTGTCAGAGCATAGGTGGTCAGGCTGCACCGGGGAAGGCTGGCGATTGACAAAGCAGCTGGGAGGTGAACATTTCTGTATTACT|	-	-	3338462	-	-
chr1:59294019..59294100,-	59294046	p1@Als2	[Als2]	Als2			Als2	42.1907	134.321	691.236	55.328	217.056	1146.23			6.084	118.989	172.255	11.1187	87.0396	163.407	2286.36	558.893	2845.25	0.387066	0.729231	0.690343		-0.0758476	-0.448871	4.27425	5.46959	4.61048	4.43286	0.336238	-1.03673	0.708811	-0.184552	2	ENSMUST00000027178|ENSMUST00000160945	107|291	199	>1|TACCCGCGGTGCAGTCGGGCTCGCGCCGGGAGAAGAGCGCGGAGCTGCGGGAGCGTCAGGTCTTGAGAGAGCTTTTGCTAATGGGATGGTTTGGTGATGGAGTACTCCTCCTGACCG|>2|TACCCGCGGTGCAGTCGGGCTCGCGCCGGGAGAAGAGCGCGGAGCTGCGGGAGCGTCAGGTCTTGAGAGAGCTTTTGCTAATGGGATGGTTTGGTGATGGAGTACTCCTCCTGACCGATGGACTCAAAGAAGAAAAGATGGTGAGGTCTACAGCTTTGGGACTCTTCCCTGGAAAAGTGAATCAGCAGAAATTTGTCCAAGCAGCCCCCTTCTAGAAAGTGCCCTGGTTGGGCATCATGTTATTACTGTGGCAACAGGGAGCTTCCACAGTGGAG…	-	|	59221020|59272494	-	-
chr1:59176592..59176639,-	59176606	p1@Als2cr4	[Als2cr4]	Als2cr4			Als2cr4	9.1719	63.0486	224.427	71.9264	133.707	125.468			3.042	26.1776	25.5192	12.9718	1.40386	57.4618	627.749	126.576	754.325	2.90464	-0.836396	1.07852		1.15552	-3.80863	4.896	3.88132	1.84212	2.13969	-3.05388	-1.74164	0.15827	0.38906	5	ENSMUST00000087475	28	28	>1|GTGGTGCCCTGAGCTCTGCTGCGGTCCCTGGAGACGTG|	-	-	59157980	-	-
chr1:59176923..59176979,-	59176931	p2@Als2cr4	[Als2cr4]	Als2cr4			Als2cr4	27.5157	115.132	179.542	27.664	78.1402	34.0253			10.14	46.4057	76.5576	3.70622	50.5391	73.6229	462.019	260.972	722.991	0.00761672	-2.3826	-0.556205		-0.0560184	0.121839	3.39726	3.53651	2.00012	4.88935	-1.39714	1.35284	-1.20133	-0.0576679	4	ENSMUST00000094917|ENSMUST00000190014	74|74	74	>1|GCTCTCGGTCAGAGAGGAGGATGTTCCGGTGGGGAGTTTGAATACGAGTCTGGTCCCGCCGTGCCCACCCCCACGCAAACCACG|>2|GCTCTCGGTCAGAGAGGAGGATGTTCCGGTGGGGAGTTTGAATACGAGTCTGGTCCCGCCGTGCCCACCCCCACGCAAACCACG|	-	|	59157980|59165038	-	-
chr10:40021992..40022012,-	40021994	p1@Amd1,p1@Amd2	[Amd1, Amd2]	Amd1, Amd2	Amd1		Amd1	42.1907	411.186	350.106	52.5616	109.396	91.4431			29.406	117.799	51.0384	42.6215	47.7314	16.1611	1056.88	304.758	1361.64	0.313745	-1.93104	-1.9054	0.527973	-1.62916	-1.2944	4.1574	2.50139	1.92389	0.578484	-2.23351	-1.92291	-1.6629	-0.893108	1	ENSMUST00000099945	331	331	>1|ACGCAGAACCCTCGCTTACACAGTATGGCCGGCGACATTAGCTAGCGCTCGCTCAACTCTCCTAACGGGAAAGCAGCGGACTACAAGAGACTGAACTGTATCTGCCTCTATTTCCAACAGACTCACGTTCAACTTTCGCTCACGAAAATAGCCGGGAAAATTTTATTAGTCCNNNNNNNNNNNNNNNNNNNNNNNNNNNNNNNNNNNNNNNNNNNNNNNNNNGGAACCTGAACTTTAGTAACACAGCTGGAACAATCCGCAGCGGCGGCAGGAGCGGCGGGAGAAGAGATTTAATTTAGTTGATTTTCTGTGGTTGTTGGTTGTTCGCTAGTCTCACGGTG|	-	-	40009134	-	-
chr17:24300635..24300738,-	24300701	p1@Amdhd2	[Amdhd2]	Amdhd2			Amdhd2	22.0126	60.3073	175.053	77.4592	187.536	561.418			21.294	58.3046	41.4687	24.0904	40.7121	131.085	1083.79	316.954	1400.74	1.79199	1.67845	1.62869	0.174166	1.64861	-0.512863	3.38913	2.20193	3.26505	2.80873	-0.124082	0.606791	1.68108	0.691945	1	ENSMUST00000040735	71	71	>1|ACCTGGCCCCGCTTCCGATTACGGCTGCTCCGGGCTCTGCCGGCTTGCGCCCAAAGCTTGCTGGGTTCGGCGCGACTCACG|	-	-	24292963	-	-
chr18:31919542..31919627,+	31919611	p1@Ammecr1l	[Ammecr1l]	Ammecr1l			Ammecr1l	18.3438	30.1537	193.007	11.0656	50.357	191.393			9.126	33.3169	178.634	1.85311	57.5584	100.558	494.32	381.047	875.367	-0.70425	-0.0120898	0.730387		-0.825858	0.77976	3.56915	4.46405	4.38858	6.07483	0.81943	1.61078	0.0658975	-0.46551	1	-	-		-	-	-	-	ENSMUST00000115808	386	386
chr6:149137170..149137247,-	149137208	p1@Amn1	[Amn1]	Amn1			Amn1	42.1907	87.7197	89.7709	85.7584	112.869	57.4178			36.504	173.724	35.0889	46.3277	188.118	66.4402	475.727	546.203	1021.93	1.01474	-0.640255	0.361854	0.339682	0.911445	0.114523	2.05981	2.49991	0.98546	2.44539	-1.07435	-0.0545181	0.220521	0.294027	3	ENSMUST00000111535|ENSMUST00000095319|ENSMUST00000141346	44|543|307	298	>1|GAAGTTGGTTGTGGAGGGCCGCAACTGCCGTCCAGGCTTAAGAGGGCTTCCGCG|>2|GAAGTTGGTTGTGGAGGGCCGCAACTGCCGTCCAGGCTTAAGAGGGCTTCCGCGATGCCTTTGTCCGGAGTAGTCAGTCAGCTCCTGGAACTGTGAGTCCGCCCCAGCTCCCAGTCCCTTCCCTCACGTCCTGCTGGCTCCTAGTCCTTGTCCCGGCTTTGTGTCTGGTCTCTGAGGACTGTGGTGCACCGTGGGGCTGGCGGCTCCACCCGATGGCCTGTCTCAGGTGGGCGTTGAGGGTGAAGGCAGAACAAAAGAAACCTGGAGCCAGGCTGGACCAACAAACCTCCACTAATACCGGCGTGACTCGCTAGCTTTGGGACCATGAACAGTAACAA…	-	||	149106279|149106279|149119395	-	-
chrX:141939679..141939702,-	141939691	p1@Amot	[Amot]	Amot			Amot	64.2033	8.22373	282.778	105.123	46.8841	284.962			46.644	19.0382	912.311	0	124.944	341.179	792.175	1444.12	2236.29	0.707016	0.0110801	2.44139	-6.559	-1.41767	2.68267	2.17159	4.30495	1.65376	9.86611	-0.517834	5.56116	0.2985	-1.0683	2	ENSMUST00000112835|ENSMUST00000143610	734|608	671	>1|CCCTGCTTCTACCTCTCACCCTTCTCTTAGGAGCTGCCTTCATCGCAGTCACGCCCCTTCCTTCCGAGGAGCTTTCTGGCTGCGTTCGCTGGTAGACCCCTGAATTACCCCTCCGTCTCCCTTCTCTTTCGTCCCTTCCCTTAGTTCTCATCGCCTTCCCCCACTACCACCACCTCCAGCCTATCTCGCCTCTCACCATCCGCTGCTCCACCCTCTGGCCCGGTATCCTGCTCGTCCACTGCCACCAAGGAGAGACCCGAGGGAGCAGCGAGGTTGGGAGTAGCCGGGACCTGGGGCTTCCTCCCTACCCATCCCTGGCCTCCGGCCCGGGACCCAAACCGCTTGAGCTTGCAGAGAGAGTCCTCACCTTGTCCTGATTGCTTTCAGAGCTGCTGA…	InrAC|InrAC	|	141884543|141910262	-	-
chrX:141939718..141939755,-	141939723	p2@Amot	[Amot]	Amot			Amot	27.5157	0	237.893	2.7664	12.1551	116.962			31.434	0	427.447	0	51.943	140.063	397.292	650.887	1048.18	-3.10046	-1.02115		-5.99702	-1.60621	6.71268	3.08903	3.74427	5.31041	8.58876	2.22138	4.84449	-1.00621	-1.25479	2	ENSMUST00000112835|ENSMUST00000143610	766|640	703	>1|GCTCCCGGCCAGAAGAAAAGCCACCGTGCCTCCCCTGCTTCTACCTCTCACCCTTCTCTTAGGAGCTGCCTTCATCGCAGTCACGCCCCTTCCTTCCGAGGAGCTTTCTGGCTGCGTTCGCTGGTAGACCCCTGAATTACCCCTCCGTCTCCCTTCTCTTTCGTCCCTTCCCTTAGTTCTCATCGCCTTCCCCCACTACCACCACCTCCAGCCTATCTCGCCTCTCACCATCCGCTGCTCCACCCTCTGGCCCGGTATCCTGCTCGTCCACTGCCACCAAGGAGAGACCCGAGGGAGCAGCGAGGTTGGGAGTAGCCGGGACCTGGGGCTTCCTCCCTACCCATCCCTGGCCTCCGGCCCGGGACCCAAACCGCTTGAGCTTGCAGAGAGAGTCCT…	-	|	141884543|141910262	-	-
chr9:102620126..102620145,+	102620133	p1@Amotl2	[Amotl2]	Amotl2			Amotl2	47.6939	268.642	897.709	96.824	331.662	686.887			12.168	127.318	258.382	7.41244	81.4241	260.374	2329.42	747.078	3076.49	1.01395	-0.385929	0.303519		0.0110568	-0.641734	4.59763	4.93009	3.38828	5.43499	-1.20934	0.504897	-0.122243	-0.187943	4	-	-		-	-	-	-	ENSMUST00000035121	161	161
chr3:107888264..107888330,-	107888312	p2@Ampd2	[Ampd2]	Ampd2			Ampd2	1.83438	10.965	44.8854	0	52.0934	263.696			13.182	0	149.925	7.41244	29.4811	93.3754	373.475	293.376	666.851		2.54131	2.19765		-0.680229	5.90598	4.59331	3.4587	9.3051	3.96257	4.71179	0.503871	2.44253	-0.323217	3	ENSMUST00000078912	61	61	>1|GGAAGGGGTTGGATGTGGGAGAGCTTGGCCCCAGCCGGTGAGGTTCCTCCGCTGTCGCCTTGGCCCCAGCC|	-	-	107877832	-	-
chr11:109287281..109287324,+	109287291	p1@Amz2	[Amz2]	Amz2			Amz2	62.3689	104.167	80.7938	113.422	138.916	148.861			36.504	52.3552	54.2283	50.034	101.078	105.945	648.529	400.145	1048.67	0.857633	0.877585	0.413585	0.449572	0.959751	0.942475	1.5607	1.53298	1.3394	2.03795	-0.221294	0.504966	0.696765	0.842964	2	ENSMUST00000092500|ENSMUST00000020929	259|259	259	>1|CGCGAGGCGCATGCGTGCTAGGACCACCGTGGCAGCTTGAGGGCGGCCTAGAGGCCTGTCCGGGGTGAAGGCCACACCCCTTTGCCAGACATGCATTGTCCTTAGAAAAACATAAATGGAAAAACAGCAGCTGGAGATTTCTCCTTTATAAAGCGTCTGCTTGGTATGAAGGATGAACGTGCCACGTAGGGACTTGATAGGAATGGGGAAAGTCCTGTCACCATGAGTATGGCGTCTCATTGGTCATCTTAGATCTACCCCCGTGTCTT|>2|CGCGAGGCGCATGCGTGCTAGGACCACCGTGGCAGCTTGAGGGCGGCCTAGAGGCCTGTCCGGGGTGAAGGCCACACCCCTTTGCCAGACATGCATTGTCCTTAGAAAAACATAAATGGAAAA…	-	|	109288399|109288399	-	-
chr2:128513093..128513132,-	128513107	p1@Anapc1	[Anapc1]	Anapc1			Anapc1	18.3438	213.817	812.426	27.664	125.024	518.887			10.14	59.4945	31.899	5.55933	37.9043	86.1926	1716.16	231.19	1947.35	0.579762	-0.646316	-0.771779		1.41996	-0.643561	5.76784	3.11046	4.51606	4.36197	-1.25179	1.2515	-0.636929	0.351202	3	ENSMUST00000014499|ENSMUST00000110333|ENSMUST00000110332	244|244|244	244	>1|GCAGGTCGGGAAATCCAAGATGGCTCCAGCCATTTGAGTTGTTCGCAAGTCTTTGGTGTCCCGCTGCCGCCCATTCTTCCTCCGGCATCCGGGAGGGAAAAGGGATGAGAAACTGGGGCGGTGAGGAGTCATCGTGACGGTCCTGTCGCTGCTCTCGGGCCTTCGCGGCCCTTGTGCCTCCGGGGAGCAGCCGGGGCTCGCAAGCGCCTGACGCGTCCCGAGTTATTCAGAAATAATGTTCATATTTGGAACCC|>2|GCAGGTCGGGAAATCCAAGATGGCTCCAGCCATTTGAGTTGTTCGCAAGTCTTTGGTGTCCCGCTGCCGCCCATTCTTCCTCCGGCATCCGGGAGGGAAAAGGGATGAGAAACTGGGGCGGTGAGGAGTCATCGTGAC…	-	||	128438683|128468136|128511529	-	-
chr8:82235732..82235783,+	82235745	p1@Anapc10	[Anapc10]	Anapc10			Anapc10	9.1719	120.615	152.61	35.9632	90.2953	74.4304			2.028	136.837	188.204	3.70622	87.0396	96.9667	483.086	514.782	997.868	1.91457	-1.03095	-0.415684		-0.953144	-0.649717	4.82278	7.0087	2.17993	5.455	-2.64286	-1.5537	-0.491726	-0.799438	1	ENSMUST00000048147	58	58	>1|CGAATCAGGTGGATTGTCATGGCATGGTAGAATGTATATTGCTTGTCTCTCTATAGAATAATTTAAAA|	-	-	82237063	-	-
chr8:82235691..82235726,+	82235698	p2@Anapc10	[Anapc10]	Anapc10			Anapc10	5.50314	137.062	148.122	0	41.6748	51.038			10.14	155.876	79.7475	0	35.0966	5.38704	383.4	286.247	669.647		-1.52794	-1.70563		-3.76884	-2.1352	5.57256	4.47197	7.54246	6.35698	1.9699	1.88501	-1.64335	-2.58708	1	ENSMUST00000048147	105	105	>1|GTCGAGCCGCAGTGGGAGTGGCGGGGGCCTGAGAACCGGAATTGTGGCGAATCAGAAGGATTGTCATGGCATGGTAGAATGTATATTGCTTGTCTCTCTATAGAATAATTTAAAA|	-	-	82237063	-	-
chr8:82235640..82235688,+	82235664	p3@Anapc10	[Anapc10]	Anapc10			Anapc10	0	131.58	179.542	22.1312	79.8766	87.1899			7.098	149.926	60.6081	3.70622	25.2696	43.0963	500.319	289.704	790.023		-1.03785	-0.71656		-0.487157	-2.54532	9.28365	4.79571	2.88835	4.03319	-6.3953	-0.76252	-0.716092	-1.58772	1	ENSMUST00000048147	139	139	>1|CCGCGACGCCAATGAACTGAGGGAGCCTAGAATCGTCGAGCCGCAGTGGGAGTGGCGGGGGCCTGAGAACCGGAATTGTGGCGAATCAGAAGGATTGTCATGGCATGGTAGAATGTATATTGCTTGTCTCTCTATAGAATAATTTAAAA|	-	-	82237063	-	-
chr11:120459955..120459992,+	120459983	p2@Anapc11	[Anapc11]	Anapc11			Anapc11	33.0188	227.523	125.679	35.9632	78.1402	95.6963			8.112	145.167	15.9495	7.41244	120.732	32.3222	596.021	329.695	925.716	0.121469	-0.391421	-1.53584		0.99663	-0.264896	3.39949	4.23008	2.25736	4.27848	-1.14213	0.0484063	-0.878847	-0.0764604	2	-	-		-	-	-	-	ENSMUST00000093140	219	219
chr11:120459994..120460007,+	120459999	p3@Anapc11	[Anapc11]	Anapc11			Anapc11	55.0314	243.971	233.404	69.16	90.2953	116.962			12.168	102.331	31.899	1.85311	94.0589	55.6661	808.824	297.976	1106.8	0.327027	-0.993723	-1.42897		0.79375	-0.120984	3.10526	3.41081	1.5765	5.99641	-1.52876	2.58561	-0.944426	0.050002	2	-	-		-	-	-	-	ENSMUST00000093140	203	203
chr11:120459768..120459832,+	120459787	p1@Anapc11	[Anapc11]	Anapc11			Anapc11	55.0314	274.124	336.641	82.992	161.49	148.861			37.518	328.41	86.1273	18.5311	211.983	77.2142	1059.14	759.784	1818.92	0.588334	-1.17455	-0.761557	-0.998324	-0.156643	-0.630341	3.46042	3.44849	1.89651	3.92812	-1.56391	0.479632	-0.758545	-0.554091	2	ENSMUST00000026128|ENSMUST00000093140	149|415	282	>1|GCGATTCCGCAGAGCGCCTGCGTACGGCTCGCCGCGGTGGCTGGCGCTACTTCGGAGGAGCCCGACGCGGCGCGGTCGTTTTTATACATTCCCGCGCGGAGGCAACGGAAGGGCGGGGCGCCTCGTGATTAGGCCGCGGAGGTCACAGGCTCTGTTGTC|>2|GCGATTCCGCAGAGCGCCTGCGTACGGCTCGCCGCGGTGGCTGGCGCTACTTCGGAGGAGCCCGACGCGGCGCGGTCGTTTTTATACATTCCCGCGCGGAGGCAACGGAAGGGCGGGGCGCCTCGTGATTAGGCCGCGGAGGTGCGAGGGCGAGCAGGGGGCGGGGCCTGCGGGCGCCTCCCTGGGAGGCCGGAAGATCCTCGGGCGTCGCCTGGGTGCAGCGCAGTGTGCGC…	-	|	120460573|120460573	-	-
chr9:102528608..102528658,+	102528632	p1@Anapc13	[Anapc13]	Anapc13			Anapc13	807.127	4536.76	2325.07	1717.93	2700.18	714.532			455.286	3362.63	1454.59	785.719	2790.88	860.131	12801.6	9709.24	22510.8	1.08933	-1.7015	-0.748499	0.786574	-0.757646	-0.268825	3.08694	3.40192	0.990879	2.21549	-2.09606	-1.18643	-0.57928	-0.248967	2	ENSMUST00000190279|ENSMUST00000188398	71|412	241.5	>1|CACGTGACCCAGAAGAAGGGCGGGGCCGGGAGGAAGCCGACGCGCGCGCAGTGGGCCTGACAAGATCAAAGCTGCAGGAGG|>2|CACGTGACCCAGAAGAAGGGCGGGGCCGGGAGGAAGCCGACGCGCGCGCAGTGGGTAAGGGTTTTTCGCGCCCGCGGCCCGGGTTTCCGAGGGTGGCCAAGCGTTCGCCCTCGAACTCCGGCGTCTACCGCTTCCAGAGGCGCGGGCCGGTACTTTCAACCGAGCTTCAGAGCCACTTCTTTACTGCACGCTGTGCGGAGTGGAACGGAGCCCCCATGGCGACGCTCGACCTCCCCCCTTGCACTTCCGCATGTAGTATCCTCCCACCCCTCGAACCGGAAGTCGCTGCAGCGGGTGACTGTAGTGTCCCA…	-	|	102532119|102532119	-	-
chr10:59465804..59465884,-	59465848	p1@Anapc16	[Anapc16]	Anapc16			Anapc16	84.3815	556.472	184.03	110.656	401.12	170.127			38.532	448.589	70.1778	9.26555	304.639	21.5482	1506.79	892.751	2399.54	0.389064	-0.113014	-0.471776	-1.99888	-1.6806	-0.557536	3.12596	3.73375	2.36279	5.06406	-0.763167	1.33032	-0.274443	-0.731488	3	ENSMUST00000182898|ENSMUST00000020307|ENSMUST00000182912	171|164|238	191	>1|CTAGCCCTCACCGCCGCAGGGACAGGCGCAGCACCGCCATCAAACTCCCACAGCTCAGGCGGGCGCGCGCACGCCGCCGTCTACGTCGTGGCGAGCGAGGCCGCACGGCTTCGTCCAAGGGGCGGGGCTGTCAGTCAAAGTGCACAAGCTGCTGAGTGAAGAGAGACTTCTACTGGAGGGA|>2|CTAGCCCTCACCGCCGCAGGGACAGGCGCAGCACCGCCATCAAACTCCCACAGCTCAGGCGGGCGCGCGCACGCCGCCGTCTACGTCGTGGCGAGCGAGGCCGCACGGCTTCGTCCAAGGGGCGGGGCTGTCAGTCAAAGTGCACAAGCTGCTGAGACTATAAGCGGAAAGTTT|>3|CTAGCCCTCACCGCCGCAGGGACAGGCGCAGCA…	-	||	59451470|59451470|59451470	-	-
chr2:25128007..25128037,+	25128020	p1@Anapc2	[Anapc2]	Anapc2			Anapc2	286.163	1121.17	6773.21	558.813	2193.13	7166.59			168.324	326.03	634.79	98.2148	98.2705	360.932	18099.1	1686.56	19785.6	0.964298	0.0814403	0.967677	-0.774181	-0.813692	-1.72506	4.78349	2.5095	4.06482	2.21936	-0.718673	-0.290136	0.277915	-1.01775	1	ENSMUST00000028341	15	15	>1|GGGCGGGTCTGTTTTGTGGACAGTG|	-	-	25128035	-	-
chr5:53225353..53225406,+	53225384	p1@Anapc4	[Anapc4]	Anapc4			Anapc4	22.0126	60.3073	269.313	41.496	29.5196	131.848			17.238	21.418	76.5576	7.41244	8.42318	86.1926	554.496	217.242	771.738	0.899522	-1.02762	-1.01834		0.169972	-1.29649	3.87419	2.47292	1.94649	3.58749	-1.9277	1.11457	-0.792055	-0.174537	1	-	-		-	-	-	-	ENSMUST00000031072	118	118
chr5:53225284..53225351,+	53225293	p2@Anapc4	[Anapc4]	Anapc4			Anapc4	14.675	101.426	462.32	44.2624	111.133	397.671			24.336	74.9631	41.4687	9.26555	7.01932	308.857	1131.49	465.91	1597.4	1.56059	-0.217062	0.131238	-1.34666	2.88189	-3.3271	5.21655	2.23516	3.50817	5.0178	-1.70838	2.78263	-0.0646105	1.20485	1	ENSMUST00000031072	209	209	>1|TGTGCCACTCACTTCCTCTCGCGAAGACGTCCCGGCGTCGGCGCCGGAAGCTTTCTCCGAGCGCGGAGGGCGGAGTGAGAGGGCGGGGAAGGCCGCTGGCTAGGAGTAGGCCGAGTCTGCGACTCTGGCAGGTACCGCTGCTGGCAGGGCTTTGTGCCAGAGCTTTGTGGCCGGGTGCTCCGGCGGCCTTCTCGCGCACGTCGTTGCAGGGCCGCACCC|	InrAC	-	53225502	-	-
chr5:123271267..123271301,-	123271288	p1@Anapc5	[Anapc5]	Anapc5			Anapc5	434.748	1340.47	897.709	921.211	1184.26	623.089			156.156	486.665	76.5576	316.882	293.408	166.998	5401.48	1496.67	6898.15	1.08248	-0.526455	-0.178682	1.01862	1.12014	-0.729048	2.36274	1.84739	0.971886	0.538253	-1.39085	-1.30913	0.0297143	0.111623	6	ENSMUST00000086216|ENSMUST00000196640|ENSMUST00000197719|ENSMUST00000197074|ENSMUST00000199406|ENSMUST00000200645	130|130|130|130|130|130	130	>1|TGTGGGAAACAGTCTTGGGCGGGTTAAGGTGCCGGGCGGCTGCAGCCATGGCGTAAAGGCGGCTCGTGGGCGCGGCGCGTGGCAGGCCTGGAGAGGGCCTGTCCTTGCCGGCGTCCACGAAGAGCCAGGACTTCAGCCCG|>2|TGTGGGAAACAGTCTTGGGCGGGTTAAGGTGCCGGGCGGCTGCAGCCATGGCGTAAAGGCGGCTCGTGGGCGCGGCGCGTGGCAGGCCTGGAGAGGGCCTGTCCTTGCCGGCGTCCACGAAGAGCCAGGACTTCAGCCCG|>3|TGTGGGAAACAGTCTTGGGCGGGTTAAGGTGCCGGGCGGCTGCAGCCATGGCGTAAAGGCGGCTCGTGGGCGCGGCGCGTGGCAGGCCTGGAGAGGGCCTGTCCTTGC…	-	|||||	123237815|123237815|123237815|123237815|123238330|123237815	-	-
chr5:122872449..122872504,+	122872490	p1@Anapc7	[Anapc7]	Anapc7			Anapc7	7.33752	41.1186	255.847	8.2992	83.3495	323.241			29.406	16.6585	175.444	9.26555	54.7507	150.837	719.193	436.362	1155.55		0.336741	1.01057	-1.61466	-0.217354	1.68707	5.24618	2.68712	5.53183	4.39941	0.285651	1.71229	0.446587	-0.0439119	3	ENSMUST00000031422|ENSMUST00000119792	96|96	96	>1|CTCCATTTTGGAACTTTCCCCGAGCCTCTGCTCTCGGTTCCCGGGAGTTCTGTCCGCCGCTGCCGGTGCCGCGGTGTCGCCGGGGGCCACGGTGTTGCCGGGCAGG|>2|CTCCATTTTGGAACTTTCCCCGAGCCTCTGCTCTCGGTTCCCGGGAGTTCTGTCCGCCGCTGCCGGTGCCGCGGTGTCGCCGGGGGCCACGGTGTTGCCGGGCAGG|	-	|	122872586|122872586	ENSMUST00000122010	96	96
chr1:192752452..192752531,+	192752489	p1@Angel2	[Angel2]	Angel2			Angel2	12.8407	167.216	103.237	16.5984	173.645	119.089			25.35	148.736	3.1899	9.26555	14.0386	14.3654	592.625	214.946	807.571	0.358031	0.205157	0.0542692	-1.40439		-3.35963	4.34414	2.55987	4.10012	1.5655	-0.24402	-0.994374	0.126647	-2.21956	3	-	-		-	-	-	-	ENSMUST00000066632|ENSMUST00000110899	89|114	101.5
chr1:192752380..192752429,+	192752418	p2@Angel2	[Angel2]	Angel2			Angel2	38.522	131.58	193.007	49.7952	232.684	195.646			35.49	123.749	19.1394	3.70622	35.0966	37.7093	841.234	254.89	1096.12	0.366134	0.0195373	0.820061	-3.097	0.960172	-1.80342	3.05847	1.99426	3.09191	4.12333	0.0334454	2.12908	0.396508	-1.21582	3	ENSMUST00000066632|ENSMUST00000110899	160|185	172.5	>1|GAACTGCCCCAGAAGGCAAGATGGTGACCGGGCCTGCGGCGAGACGCTCCTCCCAGCATGCCTAGCGGCCGGCCGGGAGCCGAGTGATGGGGATCCGGTAGGACCCGGCGAGCGGCCGAAGCTGAGGTGCAGCCGCGGGCCCGGGCGTTGGGCGCTCACAGAGAGCCAAG|>2|GAACTGCCCCAGAAGGCAAGATGGTGACCGGGCCTGCGGCGAGACGCTCCTCCCAGCATGCCTAGCGGCCGGCCGGGAGCCGAGTGATGGGGATCCGGTAGGACCCGGCGAGCGGCCGAAGCTGAGGTGCAGCCGCGGGCCCGGGCGTTGGGCGCTCACAGAGAGCCAAGATGGAGACGTGGCGCTGTATACTCC|	-	|	192752578|192756752	-	-
chr2:33071571..33071604,+	33071588	p1@Angptl2	[Angptl2]	Angptl2			Angptl2	14.675	90.461	242.381	0	34.729	165.874			16.224	38.0765	130.786	3.70622	21.058	68.2358	548.12	278.086	826.206		-0.545826	-1.36849		-0.933578	-0.839501	4.45723	3.34012	8.65179	4.41602	4.19455	1.0759	-0.791228	-0.989052	2	ENSMUST00000004208|ENSMUST00000193373	426|426	426	>1|CTGTGCTCACAGTTTCCTCTGGCGGCACGTAAAGGCTCCACAAAGGACCTGGGAGTTCAACTGAGGCTGCTGCTGTCGGCCTGGGGATGGACCCCAAGCCCTGAGTGGTGTTGTTGGACCCAGGACCTGCAAGAAGCATGCACTAAGGCAGCTGCGGACCACACTGTGAGGGAGAGCAGGTTGGGAGCAGCCCCGGTGACACCAGAGCCAGCCTCATCCCTAGGAGCTTCAGAGAGCATAGACTGCTGCCAGCTGAGGCCAGTGAGGCAGGGCTGCTCGGCGGCCAGTCCAGCCTGAGACTCGGGACCTCTCCTGGAGGCCACGGCCAGGCTGTGCTGCTGATGGCACCGTGAGGCATGTGAAGCGCTGCTCCAGGGCCAAGCAGGAGAGAAGAGG…	-	|	33083735|33083735	-	-
chr2:33071610..33071626,+	33071617	p2@Angptl2	[Angptl2]	Angptl2			Angptl2	51.3626	238.488	960.548	24.8976	140.652	457.216			47.658	146.356	704.968	18.5311	169.868	387.867	1873.16	1475.25	3348.41	-1.03	-1.07016	-0.759686	-1.33942	-0.86116	0.214244	4.53164	4.14471	4.55827	4.87444	0.0266311	0.729732	-1.00505	-0.64111	2	ENSMUST00000004208|ENSMUST00000193373	397|397	397	>1|TAAAGGCTCCACAAAGGACCTGGGAGTTCAACTGAGGCTGCTGCTGTCGGCCTGGGGATGGACCCCAAGCCCTGAGTGGTGTTGTTGGACCCAGGACCTGCAAGAAGCATGCACTAAGGCAGCTGCGGACCACACTGTGAGGGAGAGCAGGTTGGGAGCAGCCCCGGTGACACCAGAGCCAGCCTCATCCCTAGGAGCTTCAGAGAGCATAGACTGCTGCCAGCTGAGGCCAGTGAGGCAGGGCTGCTCGGCGGCCAGTCCAGCCTGAGACTCGGGACCTCTCCTGGAGGCCACGGCCAGGCTGTGCTGCTGATGGCACCGTGAGGCATGTGAAGCGCTGCTCCAGGGCCAAGCAGGAGAGAAGAGGCTTTCAGTTCATAAAGACCAACCAGCACA…	-	|	33083735|33083735	-	-
chr2:33071629..33071644,+	33071636	p3@Angptl2	[Angptl2]	Angptl2			Angptl2	1.83438	71.2723	372.549	22.1312	26.0467	116.962			7.098	48.7855	200.964	0	21.058	73.6229	610.796	351.528	962.324		-1.66717	-1.43489		-1.44253	-1.19294	7.57242	5.0416	2.66475	7.5726	-4.90767	2.531	-1.4295	-1.43497	2	ENSMUST00000004208|ENSMUST00000193373	378|378	378	>1|CTGGGAGTTCAACTGAGGCTGCTGCTGTCGGCCTGGGGATGGACCCCAAGCCCTGAGTGGTGTTGTTGGACCCAGGACCTGCAAGAAGCATGCACTAAGGCAGCTGCGGACCACACTGTGAGGGAGAGCAGGTTGGGAGCAGCCCCGGTGACACCAGAGCCAGCCTCATCCCTAGGAGCTTCAGAGAGCATAGACTGCTGCCAGCTGAGGCCAGTGAGGCAGGGCTGCTCGGCGGCCAGTCCAGCCTGAGACTCGGGACCTCTCCTGGAGGCCACGGCCAGGCTGTGCTGCTGATGGCACCGTGAGGCATGTGAAGCGCTGCTCCAGGGCCAAGCAGGAGAGAAGAGGCTTTCAGTTCATAAAGACCAACCAGCACACTGCAAGGACC|>2|CTGG…	-	|	33083735|33083735	-	-
chr3:127111904..127111926,-	127111915	p3@Ank2	[Ank2]	Ank2			Ank2	12.8407	16.4475	71.8167	41.496	112.869	204.152			22.308	42.836	6.3798	51.8871	26.6734	152.633	459.622	302.717	762.339	1.65442	1.50077	2.74189	1.19967	4.47627	-0.673371	2.73415	1.12417	2.91853	1.77916	0.184382	0.654994	1.82108	1.68567	7	ENSMUST00000182064|ENSMUST00000182959|ENSMUST00000182008|ENSMUST00000182547|ENSMUST00000182610|ENSMUST00000183095	198|194|194|194|194|193	194.5	>1|GAAGCACATGGATTACAGTCTGAGGCTGTGATGGGAAAGTCGGTTCCTGGGCTGCTGTCTCATACACATCAGCAGGCAGGGAAGCTGGGGACTCCGACTCGCCCTTCTCCGGGCCCCTCCTGCTGCGTGGTCACAGGCAATCGCTGAGAGAAGCTGCTGCTCCAGTAAGTAAGTAACTGATCAGGGACATGAAGAACTGCTATTTCAA|>2|GAAGCACATGGATTACAGTCTGAGGCTGTGATGGGAAAGTCGGTTCCTGGGCTGCTGTCTCATACACATCAGCAGGCAGGGAAGCTGGGGACTCCGACTCGCCCTTCTCCGGGCCCCTCCTGCTGCGTGGTCACAGGCAATCGCTGAGAGAAGCTGCTGCTCCAGTAAGTAACTGATCAGGGAC…	-	|||||	126650029|126662756|126728492|126728492|126734901|126782862	-	-
chr10:68996551..68996596,+	68996574	p1@Ank3	[Ank3]	Ank3			Ank3	1.83438	74.0135	103.237	16.5984	19.1009	23.3924			4.056	51.1653	229.673	3.70622	42.1159	34.1179	238.176	364.834	603.01		-2.1183	-1.92658		-2.73313	-0.277802	6.25067	5.94839	1.33025	4.18927	-4.92041	-1.75913	-1.59148	-1.82697	4	ENSMUST00000182884|ENSMUST00000182155|ENSMUST00000183148|ENSMUST00000183169	395|395|395|395	395	>1|CTCTCTCACCATTTCCAAGCTAGAATCACCGTGGAGAAGCAAGCCCTGAAATGTTGTCAAGATCTTTTCTCGGGGTAACGACTGGCTNNNNNNNNNNNNNNNNNNNNNNNNNNNNNNNNNNNNNNNNNNNNNNNNNNNNNNNNNNNNNNNNACAAAGGGTTGGAATATTGATTTTTCTTTGGAGGAATAACCAGGGCTTTGCTGGAGAGAACACCCAGTTCCTCCCTGAGGCGAGCTGAGTTGCCCGTGACAGCAGCCAGGGCTGGCTTGAAGCAGCCGCTCTGCCTGGGGAGTTCCCTAAATGGACTTTGGTCTCAATGCTGTGACTCTTTGCCGTGGGTTTGGATGTGGGAACACGGAAGGTGATCTCCTGCCTCGTCTCAACTCCCCTGATCT…	Inr|Inr|Inr|Inr	|||	68996969|68996969|68996969|68996969	-	-
chr11:72503485..72503496,+	72503490	p2@Ankfy1	[Ankfy1]	Ankfy1			Ankfy1	0	57.5661	201.984	16.5984	64.2486	85.0634			1.014	45.2158	76.5576	3.70622	9.82705	93.3754	425.461	229.696	655.157		-1.24275	0.157153		0.284809	-2.14627	9.02265	6.3356	3.13122	4.62378	-5.89143	-1.71182	-0.644047	-0.198916	1	ENSMUST00000155998	36	36	>1|TTGCGCCGGCATTTATCGCGAGGCTGTAGGCAGGGCCGGGCCCGAC|	-	-	72503526	-	-
chr12:36883754..36883825,+	36883788	p1@Ankmy2	[Ankmy2]	Ankmy2			Ankmy2	18.3438	41.1186	368.061	33.1968	116.342	155.241			14.196	26.1776	66.9879	5.55933	58.9623	64.6445	732.302	236.528	968.83	0.838522	-1.24276	1.48926		-0.0509858	1.15635	4.44233	2.67209	3.01336	4.35628	-1.42897	1.68419	-0.487558	0.265622	1	ENSMUST00000041640	155	155	>1|GCCAGCCCCCAGCCGTGAGACCCTAGCGACTCTGCCACTTCACTGGGCTGCTGCTCCGGCCTCGAGTTGCCTTGCTGTGGCGGTCTTCCACGACGCATACACGTCTCTTGTTTTTTTAAAAAACCTTTCCAAAGAAATAGAATAAGCGTCAAGCTGGCGGGAACG|	-	-	36883943	-	-
chr13:99033060..99033132,+	99033097	p1@Ankra2	[Ankra2]	Ankra2			Ankra2	20.1782	84.9785	89.7709	60.8608	31.2561	155.241			29.406	36.8866	12.7596	1.85311	43.5198	46.6877	442.285	171.113	613.398	1.56921	0.786813	-1.42853	-3.66779	1.83137	0.235631	3.08323	0.745705	1.60762	5.26858	-1.4756	4.52288	0.342877	0.218496	4	ENSMUST00000150916|ENSMUST00000091356|ENSMUST00000123924|ENSMUST00000022164	528|528|430|430	479	>1|AATGACCCGGAACTGAGGCGATCCATGGTTCTCCGAGAGGATGGGCTACGGGGCGCTAGGGAAACAAGAAGCGATCCCTGGGAGTCGTCTCGCCTTCACCGAACGCTCTGGGCTTTTTCCAGAGGAGATAAAAGATAGGAAGTGACGTCTGGGCCCGAAGCAGGCCCGGGGCTCGGGACCGATCTGGCTAGGCCAGGCCAGAGCCGCTCTCCCGCTGAGCTCAGGGCGCGTGTACCACCCGCCTGACCGGCCCCTGTCCCCGGATCCGCTCGCCGCGTCGGAGCGGGAGCGGGTGTCACCCCGCGGCCGTAGAGCGGGAACGCCCGCCCGGACACCTGTCGCCCCTGAGTGCAATATCCATACATCTCCTTCTCCTGGAATTCAAGTAAGGCATGT…	-	|||	99038419|99038419|99036201|99036201	-	-
chr19:36194323..36194337,-	36194329	p1@Ankrd1	[Ankrd1]	Ankrd1			Ankrd1	370.545	1617.33	3056.7	464.755	1349.22	1690.63			234.234	483.095	625.22	302.057	487.141	976.85	8549.19	3108.6	11657.8	0.326429	-0.854219	-0.261402	0.36618	0.643357	0.0120185	3.65516	2.23992	2.70815	2.27512	-0.947011	0.0351998	-0.525416	0.39542	1	ENSMUST00000025718	59	59	>1|GGGGCTCCACAGGGCCAGTTCCAGGGGTTCATCCACAAGAGAGAAAAACATAGACTCACGGCTGCCAAC|	-	-	36187196	-	-
chr8:11635745..11635765,-	11635753	p1@Ankrd10	[Ankrd10]	Ankrd10			Ankrd10	11.0063	106.908	233.404	44.2624	59.0392	74.4304			21.294	46.4057	28.7091	5.55933	65.9816	26.9352	529.051	194.885	723.936	1.95987	-1.64229	-0.851195	-1.8467	-0.0903898	0.503192	4.88849	1.79474	1.58155	3.94645	-3.30694	2.15171	-0.981076	0.0304529	2	ENSMUST00000033905|ENSMUST00000169782	137|137	137	>1|TCCCGCCCTCAGTGCTCGCTGCGCTCGGATGCGGATGGGACGCGGCAGCAGCTCGCCTGTCCTTTGTGTTCGAGTGGCGGCAGCTTCGCAGGCCTTCACCGGCACATTCCTCTGGCCGATCAGTCGCGTGCTTCCTAGCGACCCATC|>2|TCCCGCCCTCAGTGCTCGCTGCGCTCGGATGCGGATGGGACGCGGCAGCAGCTCGCCTGTCCTTTGTGTTCGAGTGGCGGCAGCTTCGCAGGCCTTCACCGGCACATTCCTCTGGCCGATCAGTCGCGTGCTTCCTAGCGACCCATC|	-	|	11612483|11615650	-	-
chr17:66426373..66426421,-	66426383	p1@Ankrd12,p1@LOC100505124	[Ankrd12, LOC100505124]	Ankrd12, LOC100505124	Ankrd12		Ankrd12	34.8532	252.194	480.274	41.496	187.536	299.848			23.322	180.863	82.9374	22.2373	155.829	143.654	1296.2	608.843	1905.05	0.24841	-0.678723	-0.426381	-0.0672324	0.788849	-0.214298	4.37384	3.47181	3.53822	3.72175	-0.835621	0.249934	-0.536466	0.163871	2	ENSMUST00000038116|ENSMUST00000150766	212|212	212	>1|GTCCAGGAGCAAGGAGGCTGTGGTGAGAGACCGACCAAGACCGGAGATGTTTTTAAGCCTGGCCCNNNNNNNNNNNNNNNNNNNNNNNNNNNNNNNNNNNNNNNNNNNNNNNNNNNNCACCCGGAGGTCCTCGTTCAGGGGGTGAACCCTTCTGCGCCCGCTGAGCCTCGGATCCAGGATGAGAAGACTGTTAGAAGAAGCAGCTAGCTGAACAGCTATAAA|>2|GTCCAGGAGCAAGGAGGCTGTGGTGAGAGACCGACCAAGACCGGAGATGTTTTTAAGCCTGGCCCNNNNNNNNNNNNNNNNNNNNNNNNNNNNNNNNNNNNNNNNNNNNNNNNNNNNCACCCGGAGGTCCTCGTTCAGGGGGTGAACCCTTCTGCGCCCGCTGAGCCTCG…	-	|	66319491|66336384	-	-
chr6:118512244..118512298,-	118512288	p1@Ankrd26	[Ankrd26]	Ankrd26			Ankrd26	14.675	98.6847	242.381	30.4304	69.4579	150.987			19.266	22.6079	15.9495	24.0904	12.6348	16.1611	606.617	110.71	717.327	1.02733	-0.681053	-0.50363	0.315076	0.0184418	-0.814995	4.49239	0.982575	2.83659	0.252602	-1.6558	-0.729974	-0.503008	-0.127605	1	ENSMUST00000112830	214	214	>1|CTGGGCCTGTGTGAGCATGCGCGGCAGCAAGAAGGCGCGGGTTGCTAGTTTGCAGCTCGGCTTGGCGATTATTGTGCTTTAAAAACCTGCCGGGCCATGCAGCGTCTTTCCCGGTGGGATCCCGTGCGTCTAGGCCGGCTTTTCAATAAGTGCCCTAGCTGCGTTGTGTTGTCAGCCAACGTTGCGCGGGGAAGAAGGTGCCTGTGAGGGGCGTACCCTCTGCC|	-	-	118453040	-	-
chr7:36371251..36371309,+	36371268	p1@Ankrd27	[Ankrd27]	Ankrd27			Ankrd27	152.254	397.48	466.809	171.517	262.204	365.772			193.674	207.041	695.398	25.9435	1054.3	274.739	1816.04	2451.1	4267.13	0.171344	-0.351458	-0.59926	-2.87636	-1.33819	2.3455	2.50114	2.21728	1.86931	5.65187	-0.631833	3.43459	-0.34632	0.305754	4	ENSMUST00000040844|ENSMUST00000188906|ENSMUST00000186245|ENSMUST00000190503	149|149|149|149	149	>1|GCCCAACGGCGGAGTAAAGAGGTAGGCTGAAGAGTGGAGCCACCGCACCCGGGTGGTGGGCACTCAGGTCCCAGCCCAGGGTCCGGGAGGTGCTGTCGTAGCACAGAGGTGAAACTATGTAGCCTCTTAAGAAGCTCACTTGGATCCCCCGAAGTCCCT|>2|GCCCAACGGCGGAGTAAAGAGGTAGGCTGAAGAGTGGAGCCACCGCACCCGGGTGGTGGGCACTCAGGTCCCAGCCCAGGGTCCGGGAGGTGCTGTCGTAGCACAGAGGTGAAACTATGTAGCCTCTTAAGAAGCTCACTTGGATCCCCCGAAGTCCCT|>3|GCCCAACGGCGGAGTAAAGAGGTAGGCTGAAGAGTGGAGCCACCGCACCCGGGTGGTGGGCACTCAGGTC…	-	|||	36376799|36376799|36376799|36376799	-	-
chr7:36371314..36371329,+	36371319	p2@Ankrd27	[Ankrd27]	Ankrd27			Ankrd27	7.33752	98.6847	175.053	19.3648	104.187	57.4178			19.266	30.9371	95.697	5.55933	143.194	23.3438	462.045	317.997	780.042	1.34175	-1.59983	0.0778911		-2.01238	2.19246	5.12889	2.68526	3.02864	4.78487	-2.10025	2.09962	-0.633795	0.237493	4	ENSMUST00000040844|ENSMUST00000188906|ENSMUST00000186245|ENSMUST00000190503	98|98|98|98	98	>1|GGTGGTGGGCACTCAGGTCCCAGCCCAGGGTCCGGGAGGTGCTGTCGTAGCACAGAGGTGAAACTATGTAGCCTCTTAAGAAGCTCACTTGGATCCCCCGAAGTCCCT|>2|GGTGGTGGGCACTCAGGTCCCAGCCCAGGGTCCGGGAGGTGCTGTCGTAGCACAGAGGTGAAACTATGTAGCCTCTTAAGAAGCTCACTTGGATCCCCCGAAGTCCCT|>3|GGTGGTGGGCACTCAGGTCCCAGCCCAGGGTCCGGGAGGTGCTGTCGTAGCACAGAGGTGAAACTATGTAGCCTCTTAAGAAGCTCACTTGGATCCCCCGAAGTCCCT|>4|GGTGGTGGGCACTCAGGTCCCAGCCCAGGGTCCGGGAGGTGCTGTCGTAGCACAGAGGTG…	-	|||	36376799|36376799|36376799|36376799	-	-
chr14:32643839..32643919,-	32643868	p1@Ankrd28	[Ankrd28]	Ankrd28			Ankrd28	23.8469	46.6011	152.61	19.3648	166.699	480.608			36.504	57.1147	102.077	14.8249	37.9043	116.719	889.73	365.144	1254.87	-0.293526	1.65179	1.82773	-1.27181	0.192504	-0.585169	3.03611	2.10953	5.02728	3.33947	1.99117	1.22994	1.57741	-0.207195	0	-	-		-	-	-	-	-	-
chr13:77274677..77274752,-	77274724	p1@Ankrd32	[Ankrd32]	Ankrd32			Ankrd32	42.1907	430.375	686.747	44.2624	211.847	576.304			27.378	341.498	832.564	92.6555	384.659	644.649	1991.73	2323.4	4315.13	0.0683642	-0.252747	-1.02085	1.74051	-0.368795	0.171463	4.71037	5.39685	4.13903	3.46659	-0.571338	-1.93026	-0.477654	-0.098697	2	ENSMUST00000151524|ENSMUST00000159462	112|681	396.5	>1|GAAATTGTTTCCTAGAACCTAGTTTATTGGAGCAGGGAGTCCTACGGTGGTAGTCGTCGCCCCTACCGCCACCACCGGCAGCTTCGCAAGACGAAACCAGCCCAGAAGCTTCGGCCGGGAAG|>2|GAAATTGTTTCCTAGAACCTAGTTTATTGGAGCAGGGAGTCCTACGGTGGTAGTCGTCGCCCCTACCGCCACCACCGGCAGCTTCGCAAGACGAAACCAGCCCAGAAGCTTCGGCCGGGAAGGTAAAGCGCCTCAGCTCGGAAGACGCCATTTACCGCGTTCTCAGGCAGCGCCTCTGACTTCCCGGCCGTCCTCTCTGGGCCGCGGAGGCGCTTGGCGCTCGTGCTTTCACAGCCTTGGTTCCTTCAAGGTGAACTCGGGGCCCGCGCC…	-	|	77182809|77243880	-	-
chr11:94189556..94189575,+	94189569	p3@Ankrd40	[Ankrd40]	Ankrd40			Ankrd40	5.50314	60.3073	85.2823	49.7952	256.994	72.3039			7.098	22.6079	44.6586	25.9435	57.5584	70.0315	530.186	227.898	758.084	3.06663	-0.236666	2.08222	1.79922	0.643267	1.32912	4.60499	3.15688	2.71309	2.27617	-1.8919	-0.880711	1.32425	1.04089	3	ENSMUST00000021227	-2	0	>1||	-	-	94189567	-	-
chr1:54983155..54983246,-	54983187	p1@Ankrd44	[Ankrd44]	Ankrd44			Ankrd44	25.6813	148.027	143.633	8.2992	97.2411	482.735			29.406	26.1776	57.4182	9.26555	46.3275	28.7309	905.617	197.326	1102.94	-1.57309	1.74532	-0.603689	-1.61466	-0.986523	0.811729	3.48015	1.4916	6.04372	2.95182	2.56357	1.46022	0.889407	-0.420171	2	ENSMUST00000179030|ENSMUST00000044359	178|178	178	>1|TGCGACTCCCGCGAGCCGGGGCTGGGCTCTGAGAGGCAGGCGGCGGCGGCCGAGCAGTGGCGGGGCTGTCACCTTCGCGAGCCCAGCTCCTGGAGCTTTCCCGGGCCGTCCCTTCCGCGTCCCCGGGCTCCCGGCGTTGACATCTGCGGAGCGGAGAGCTGTATGTGCGCGCGCGCGGGAAAGGAAGA|>2|TGCGACTCCCGCGAGCCGGGGCTGGGCTCTGAGAGGCAGGCGGCGGCGGCCGAGCAGTGGCGGGGCTGTCACCTTCGCGAGCCCAGCTCCTGGAGCTTTCCCGGGCCGTCCCTTCCGCGTCCCCGGGCTCCCGGCGTTGACATCTGCGGAGCGGAGAGCTGTATGTGCGCGCGCGCGGGAAAGGAAGA|	-	|	54705120|54705120	-	-
chr15:36426477..36426563,-	36426531	p1@Ankrd46	[Ankrd46]	Ankrd46			Ankrd46	1.83438	98.6847	112.214	27.664	67.7215	106.329			14.196	39.2664	60.6081	0	23.8657	19.7525	414.447	157.689	572.136	3.59274	-0.0773556	-0.539892		-1.59327	-0.706698	6.50078	2.7719	2.63172	6.4633	-3.86906	3.6914	-0.0765409	-1.37679	1	ENSMUST00000057486	190	190	>1|CGCCCCGCCTGTCGCCGCTGGAGAGGAGGAGCTGCTGCCATCACTGCTGCCGCGGGCGCAGNNNNNNNNNNNNNNNNNNNNNNNNNNNNNNNNNNNNNNNNNNNNNNNNNNNNNNNNNNNNNNNNNNNNNNNNNNNNNNNNNNNNNNNNNNNNNNNNNCATCCCTTTACCTTGCAAAGGAGTGGCCGTCCACCACAGACG|	-	-	36409011	-	-
chr9:14588950..14589021,-	14588991	p1@Ankrd49	[Ankrd49]	Ankrd49			Ankrd49	133.91	644.192	251.358	251.742	210.11	114.836			86.19	301.042	232.863	126.011	80.0203	77.2142	1606.15	903.341	2509.49	0.908173	-1.12678	-1.61403	0.545331	-1.58632	-1.90494	2.73694	2.624	0.367606	0.31823	-2.36934	-2.30577	-0.835475	-1.12905	0	-	-		-	-	-	-	-	-
chr16:4964261..4964313,-	4964303	p1@Anks3	[Anks3]	Anks3			Anks3	14.675	54.8248	188.519	13.832	295.196	357.266			28.392	70.2035	9.5697	44.4746	15.4425	41.3006	924.313	209.383	1133.7	-0.0824603	0.920487	2.41812	0.638442	2.0535	-2.1489	4.00618	1.47425	5.50969	0.347991	1.5035	-1.12626	1.36697	-0.0953183	1	ENSMUST00000023157	94	94	>1|TGCGAGGATTACTTCCGGGGTGGGCCGGGCGCAGGGCTGTCGGCCGGTGAGGGGCGAGCCGCTGTCGCTGGAGGGTGGCCCGGGAACCTGAGGCCTTGCAAGCT|	InrAC	-	4941915	-	-
chr9:22193557..22193640,-	22193610	p1@Anln	[Anln]	Anln			Anln	122.903	487.941	2316.09	132.787	220.529	1018.63			24.336	172.534	810.235	18.5311	233.041	755.981	4298.88	2014.66	6313.54	0.111155	-1.18466	-1.14395	-0.384074	-0.0999252	0.432622	4.5063	5.30708	3.21734	5.7003	-1.28897	0.393221	-1.09288	0.00064307	1	ENSMUST00000040912	180	180	>1|TTGAACGGCCGTGGTAGCCTACCGACTCCGTGGGTGCGGAGGGCAGAGCCGACTGGGTGTGAGAGCGCCCGCCGCCTCGACTGCAGTCCTCCTCCAGGAGCTGCGCCGAGCCTGCACTCACTTCTTTCCTCTTCCTGAGTTTGAACCGTCGGACCCACCGTCTAGCCGTCCACTGGTGAGGCCTGGGGCG|	-	-	22137493	-	-
chr9:22193530..22193543,-	22193536	p2@Anln	[Anln]	Anln			Anln	3.66876	52.0836	175.053	13.832	15.628	78.6836			5.07	39.2664	140.356	9.26555	7.01932	70.0315	338.949	271.008	609.958		-1.14863	-1.70504		-0.997877	-2.40287	5.77097	5.01515	2.72582	2.98937	-3.04515	-2.02578	-1.0902	-1.09298	1	-	-		-	-	-	-	ENSMUST00000040912	106	106
chr9:122203479..122203525,-	122203491	p1@Ano10	[Ano10]	Ano10			Ano10	40.3564	175.439	1104.18	121.722	357.708	1418.43			25.35	157.065	669.879	38.9153	272.35	748.799	3217.84	1912.36	5130.2	1.58087	0.361174	1.02572	0.608592	0.160564	0.792154	4.96958	5.00043	3.86158	4.696	-1.108	-0.304428	0.523695	0.314561	1	ENSMUST00000042546	85	85	>1|TCGTGTATCCAGTCCGCCTTAGCGCCGCGGGCCTGGTTCTCCCCGCTCCCGCGGTCCCCGAGGACGCCGCGTGGGCGGCCGGAGGTTTGCCAAAG|	Inr	-	122085530	-	-
chr9:122203527..122203549,-	122203532	p2@Ano10	[Ano10]	Ano10			Ano10	7.33752	2.74124	116.702	5.5328	31.2561	182.886			0	8.32923	41.4687	7.41244	14.0386	89.784	346.456	161.033	507.489		0.645886	3.29241		1.10516		3.93581	6.65243	5.15296	3.72079	1.21715	-2.93164	0.790635	1.15151	1	ENSMUST00000042546	126	126	>1|GGTCGTTGACGCCTCCTGTCGGCCAAGGCGCCACGCCCCGGTCGTGTATCCAGTCCGCCTTAGCGCCGCGGGCCTGGTTCTCCCCGCTCCCGCGGTCCCCGAGGACGCCGCGTGGGCGGCCGGAGGTTTGCCAAAG|	-	-	122085530	-	-
chr9:122203461..122203473,-	122203466	p3@Ano10	[Ano10]	Ano10			Ano10	0	24.6712	107.725	22.1312	60.7757	163.747			0	29.7473	44.6586	9.26555	35.0966	96.9667	379.05	215.735	594.785		0.601832	1.28354		1.10991	0.234935	8.05416	7.22701	3.31369	3.76284	-4.74047	-3.46417	0.895109	0.921001	1	ENSMUST00000042546	60	60	>1|CGCGGGCCTGGTTCTCCCCGCTCCCGCGGTCCCCGAGGACGCCGCGTGGGCGGCCGGAGGTTTGCCAAAG|	-	-	122085530	-	-
chr15:95621262..95621290,+	95621269	p1@Ano6	[Ano6]	Ano6			Ano6	23.8469	337.173	691.236	16.5984	224.002	486.988			4.056	76.153	181.824	5.55933	81.4241	258.578	1779.84	607.595	2387.44	-0.509879	-0.504855	-0.588899		0.506879	0.0959466	5.40123	5.82613	5.37891	5.81236	-0.0223211	-0.0137643	-0.531986	0.398528	1	ENSMUST00000071874	145	145	>1|GGGCATGCTCAGTCGCAGGCTGAGCAGCGCCTGCTNNNNNNNNNNNNNNNNNNNNNNNNNNNNNNNNNNNNNNNNNNNNNNNNNNNNNNNTTGCGGCNNNNNNNNNNNNNNNNNNNNNNNNNNNNNNNNNNNNNNNNTGACGGTCTCCGGGAGAC|	-	-	95621414	-	-
chr15:95621315..95621331,+	95621325	p3@Ano6	[Ano6]	Ano6			Ano6	1.83438	156.251	834.869	69.16	138.916	361.519			8.112	145.167	427.447	14.8249	103.886	301.674	1562.55	1001.11	2563.66	4.89922	-1.20635	-0.169078		-0.50205	-0.480743	8.7306	6.05633	2.84622	4.72775	-5.88438	-1.32858	-0.801251	-0.465671	1	ENSMUST00000071874	89	89	>1|NNNNNNNNNNNNNNNNNNNNNNNNNNNNNNNNNNTTGCGGCNNNNNNNNNNNNNNNNNNNNNNNNNNNNNNNNNNNNNNNNTGACGGTCTCCGGGAGAC|	-	-	95621414	-	-
chr15:95621291..95621305,+	95621299	p4@Ano6	[Ano6]	Ano6			Ano6	42.1907	279.607	888.732	74.6928	189.273	495.494			9.126	148.736	309.42	9.26555	54.7507	226.256	1969.99	757.554	2727.54	0.816671	-0.842236	-0.561703		-0.450758	-1.43353	4.77501	5.57433	3.188	4.84932	-1.58701	-0.725011	-0.672239	-0.68595	1	ENSMUST00000071874	115	115	>1|CTGCTNNNNNNNNNNNNNNNNNNNNNNNNNNNNNNNNNNNNNNNNNNNNNNNNNNNNNNNTTGCGGCNNNNNNNNNNNNNNNNNNNNNNNNNNNNNNNNNNNNNNNNTGACGGTCTCCGGGAGAC|	-	-	95621414	-	-
chr15:95621334..95621345,+	95621339	p6@Ano6	[Ano6]	Ano6			Ano6	5.50314	52.0836	210.962	5.5328	17.3645	42.5317			4.056	26.1776	76.5576	5.55933	29.4811	39.505	333.977	181.337	515.314		-2.29692	-1.55752		-0.945758	0.168428	5.45619	4.50202	3.32356	3.51949	-2.13263	-0.982529	-2.02888	-0.515695	1	ENSMUST00000071874	75	75	>1|NNNNNNNNNNNNNNNNNNNNTTGCGGCNNNNNNNNNNNNNNNNNNNNNNNNNNNNNNNNNNNNNNNNTGACGGTCTCCGGGAGAC|	-	-	95621414	-	-
chr9:62189145..62189197,+	62189161	p1@Anp32a	[Anp32a]	Anp32a			Anp32a	133.91	1754.39	4412.24	185.349	1451.67	2152.1			66.924	1143.48	2631.67	113.04	1396.84	2393.64	10089.7	7745.6	17835.3	0.467492	-1.03559	-0.273174	0.751863	-0.136743	0.288621	5.51989	5.80732	4.27751	5.0613	-1.24238	-0.746015	-0.733537	0.0228889	1	ENSMUST00000085519	146	146	>1|CGATCAGGTTAGTGTGCGCCGCGGGTGCTGGGGGCTCGAGAACCGAGCGGAGCTGGTTGAGCCTTCAAAGTCCTAAAACGCGCGGCCGTGGGTTCGGGGTTTATTGATTGAATTCCGCTGGCGCAGGATCCTCTGCAGAAAGAGAGAGCGCGAGAG|	-	-	62189307	-	-
chr9:62189200..62189223,+	62189206	p2@Anp32a	[Anp32a]	Anp32a			Anp32a	16.5094	309.76	1122.14	41.496	224.002	435.95			3.042	49.9754	293.471	14.8249	92.655	294.492	2149.85	748.46	2898.31	1.30392	-1.363	-0.466752		0.00500063	0.884054	6.39595	6.60147	3.97513	4.66079	-2.42082	-1.94068	-1.04553	0.214	1	ENSMUST00000085519	101	101	>1|AGCGGAGCTGGTTGAGCCTTCAAAGTCCTAAAACGCGCGGCCGTGGGTTCGGGGTTTATTGATTGAATTCCGCTGGCGCAGGATCCTCTGCAGAAAGAGAGAGCGCGAGAG|	-	-	62189307	-	-
chr9:62189248..62189259,+	62189253	p32@Anp32a	[Anp32a]	Anp32a			Anp32a	7.33752	112.391	350.106	22.1312	79.8766	76.557			3.042	16.6585	127.596	0	7.01932	46.6877	648.4	201.003	849.403	1.52984	-2.18585	-0.490082		-1.44074		5.88446	5.3529	2.79377	6.76041	-3.09069	1.40751	-1.39321	-1.44706	1	-	-		-	-	-	-	ENSMUST00000085519	54	54
chr9:62225101..62225141,+	62225112	p36@Anp32a	[Anp32a]	Anp32a			Anp32a	7.33752	87.7197	359.084	8.2992	79.8766	204.152			1.014	40.4563	188.204	3.70622	127.752	132.88	746.469	494.013	1240.48		-0.813154	-0.134326		-0.50058	1.64682	5.83471	7.24185	5.01506	5.95611	-0.819654	-1.28574	-0.634674	0.202384	2	-	-		-	-	-	-	-	-
chr9:62189896..62189919,+	62189903	p5@Anp32a	[Anp32a]	Anp32a			Anp32a	99.0565	468.752	193.007	130.021	538.299	172.253			18.252	234.408	60.6081	40.7684	193.733	28.7309	1601.39	576.501	2177.89	0.390692	-0.163675	0.199383	1.13799	-1.06387	-0.274308	2.73381	3.97812	2.44568	2.4337	-0.288134	-1.54442	0.143735	-0.250625	3	ENSMUST00000135395	143	143	>1|TCGCTCGCACACAATAAGTTTTGGGCTTCGCGAGTCCGGTATAGTTTCTGATCAATGTAGCCCGAGGACCCCGGGGAGAGCGCGTGGGGACCCGACTGCTGCGGAGTTGGGAGATGGCTCGAGTTTAAAGCGCGTCTTCGTTTCTCTGCGGGG|	-	-	62190046	-	-
chr9:62189928..62189952,+	62189935	p9@Anp32a	[Anp32a]	Anp32a			Anp32a	27.5157	186.404	71.8167	58.0944	194.482	65.9241			9.126	65.444	25.5192	3.70622	117.925	25.1395	604.238	246.859	851.097	1.06453	-0.122622	0.0610413		-0.0212073	0.844656	3.20709	3.24818	2.1547	5.09303	-1.05239	1.84484	0.15635	0.549992	3	ENSMUST00000135395	111	111	>1|AGTCCGGTATAGTTTCTGATCAATGTAGCCCGAGGACCCCGGGGAGAGCGCGTGGGGACCCGACTGCTGCGGAGTTGGGAGATGGCTCGAGTTTAAAGCGCGTCTTCGTTTCTCTGCGGGG|	-	-	62190046	-	-
chr4:46463952..46463983,+	46463975	p2@Anp32b	[Anp32b]	Anp32b			Anp32b	20.1782	24.6712	130.168	38.7296	79.8766	595.444			15.21	24.9877	599.701	1.85311	164.252	210.095	889.067	1016.1	1905.17	0.923833	2.18927	1.675		-1.51098	2.69242	2.90924	5.31454	4.10662	7.31559	1.19739	2.00105	2.02542	-0.765556	1	-	-		-	-	-	-	ENSMUST00000102926	192	192
chr3:95733202..95733221,+	95733213	p1@Anp32e	[Anp32e]	Anp32e			Anp32e	203.616	1334.98	4286.56	163.218	725.835	4348.86			75.036	284.384	829.374	11.1187	98.2705	1046.88	11063.1	2345.06	13408.1	-0.318181	0.0208161	-0.878656	-2.70072	0.335823	-1.52822	4.78363	3.88277	4.95418	6.62358	0.170551	2.74081	-0.153291	-0.0400022	5	ENSMUST00000165307|ENSMUST00000015893|ENSMUST00000169426|ENSMUST00000171368|ENSMUST00000168106	306|306|306|306|306	306	>1|ATGGAGGCTCAGTCTCGCAGCAGCCATTGAAGGGGAAGGAACTGCGGGCGCGCGCGTGTCTCTCTCCCTCACTCTCTCTGTGTGAAAGTGTGTGCGTGCCCGAGTGTGCGCGCGCGGGTGTGTGGACTCGGAGGTGGGGGCAGCCGAGTTAGTCCCAAGTCGTCGGACTCCATTTGCTATTCTTTTCTTTCTCTCCCACACCCGTGTGGTAGTGGGCGTTCGTCTTTGCGTCTCTTTTCATTCATCTCCAGACCTTTAGAGGTTTTTTTAGGGTTGGGGATAGTGGGGAGGGCAGGCGAGGGGAAAGGAGGAGGAC|>2|ATGGAGGCTCAGTCTCGCAGCAGCCATTGAAGGGGAAGGAACTGCGGGCGCGCGCGTGTCTCTCTCCCTCACTCTC…	Inr|Inr|Inr|Inr|Inr	||||	95733519|95733519|95733519|95733519|95733519	-	-
chr6:87285721..87285750,-	87285728	p2@Antxr1	[Antxr1]	Antxr1			Antxr1	25.6813	57.5661	161.588	2.7664	32.9925	157.367			3.042	38.0765	0	0	12.6348	66.4402	437.961	120.193	558.155	-3.00276	-0.038062	-0.793857		7.0648	-1.55433	3.06862	3.44509	5.86867	7.31424	2.80005	3.86916	-0.341479	0.93509	3	ENSMUST00000042025|ENSMUST00000204805|ENSMUST00000205033	293|293|293	293	>1|CTTAAAATCTAGGACAAAGAGCCATCGGGACGGAACTGCTTCGACTGCAAAGCTTCAAGCGCAGCCTGGGAGCGGCCTGGTGGCCCTATCCCGGCAGCTCCACACAGCAGAACGCCCTGGGTCCCTGAAACTCGAAACCCGGGCTCAGAACCAGCGGAAACCAAAGCGAAATCCTTGAACTTCTCTGAACAATTGCTTCCGGGCGTTTGCTGAGAGCCGGGGGACCTGACCGGAGCCCAGGCCGCGTATGGCGCGCCCCTGATGTCACACGGACGCCAGCGAGGCCAGCGCTCCGGCTGCAGC|>2|CTTAAAATCTAGGACAAAGAGCCATCGGGACGGAACTGCTTCGACTGCAAAGCTTCAAGCGCAGCCTGGGAGCGGCCTGGTGGCCCTAT…	-	||	87087088|87108061|87130028	-	-
chr19:20465155..20465169,-	20465161	p1@Anxa1	[Anxa1]	Anxa1			Anxa1	157.757	967.658	4968.82	874.182	875.17	2011.75			159.198	333.169	1553.48	146.396	560.142	1912.4	9855.33	4664.79	14520.1	2.46649	-1.30424	-0.144856	-0.120554	0.299792	0.748661	5.22939	3.56279	1.72295	4.07342	-3.50644	0.510631	-0.696216	0.356205	1	-	-		-	-	-	-	ENSMUST00000025561	75	75
chr9:69301483..69301511,+	69301502	p1@Anxa2	[Anxa2]	Anxa2			Anxa2	168.763	1674.9	7401.61	760.76	1943.09	3459.95			103.428	630.642	3209.04	187.164	894.261	2829.99	15409.1	7854.53	23263.6	2.16912	-1.09698	0.214216	0.852568	-0.181314	0.503539	5.74488	5.20752	2.82744	4.31092	-2.91744	-0.896598	-0.584857	-0.0116407	2	ENSMUST00000034756|ENSMUST00000123470	61|110	85.5	>1|CAGCCGGGCTGCTCCGCTTCAAGGGAGGCTCTCAGCGATACGTGCCCGGCCCAGCTTTTTTTTTCTTCAAA|>2|CAGCCGGGCTGCTCCGCTTCAAGGGAGGCTCTCAGCGATACGTGCCCGGCCCAGGTGAATTTCCTTGCAACTGAGGGACGTGCCTTTGTGGAGTCGGAGCAGGCTTTTTTTTTCTTCAAA|	-	|	69312283|69312283	-	-
chr5:97222472..97222547,+	97222496	p1@Anxa3	[Anxa3]	Anxa3			Anxa3	168.763	1088.27	4169.86	362.398	639.013	1033.52			81.12	534.261	1454.59	240.904	359.389	944.528	7461.82	3614.8	11076.6	1.1003	-2.01191	-0.767658	1.56446	-0.622684	-0.57134	4.95735	4.60723	2.20483	2.43388	-2.75252	-2.17335	-1.41493	-0.422055	4	ENSMUST00000031447|ENSMUST00000200379|ENSMUST00000198631	124|485|124	244.333	>1|GTTGCCACCCAGGCTAGCCGGGAGCTACGGCCGGCCGAGGCTGATCTTTCACCTTCGCTGAGCTTCTGCCTGGGCTTCGCCTCCGCGGCCCCAAGGATTGCTGTGATCTCGGCTTGAGAGAAAGGTGGACTGTC|>2|GTTGCCACCCAGGCTAGCCGGGAGCTACGGCCGGCCGAGGCTGATCTTTCACCTTCGCTGAGCTTCTGCCTGGGCTTCGCCTCCGCGGCCCCAAGGATTGCTGTGATCTCGGCTTGAGAGAAAGGTGGACTGTCATGGCCTCTATCTGGCAACTCTACTTCTCATGTATCATGAATGTGAATGAAGGTTGAAAAACAAAGGTCAAAGCATATTTGCTTGTATGATTGGAAATATACAGGCAATGTAATGATTACTCAG…	-	||	97226457|97245410|97226457	-	-
chr5:97222406..97222423,+	97222416	p2@Anxa3	[Anxa3]	Anxa3			Anxa3	221.96	1567.99	4479.57	890.781	791.82	1201.52			98.358	624.692	1977.74	472.543	390.274	1237.22	9153.64	4800.83	13954.5	2.00233	-1.89806	-0.985221	2.25854	-0.676527	-0.677965	4.76485	4.71863	1.1616	1.78306	-3.60326	-2.93558	-1.12009	-0.362887	3	ENSMUST00000199330|ENSMUST00000031447|ENSMUST00000200379	64|204|565	277.667	>1|TCCAAGAGCCACTTGCAAGCCGGTCCTGGGCAGTCCATTGCTGTGATCTCGGCTTGAGAGAAAGGTGGACTGTC|>2|TCCAAGAGCCACTTGCAAGCCGGTCCTGGGCAGTCCGTGAGTAGAAACAGGAGGAGGGGCTGAGGAAGGGTGCGGTCTGGGTTGCCACCCAGGCTAGCCGGGAGCTACGGCCGGCCGAGGCTGATCTTTCACCTTCGCTGAGCTTCTGCCTGGGCTTCGCCTCCGCGGCCCCAAGGATTGCTGTGATCTCGGCTTGAGAGAAAGGTGGACTGTC|>3|TCCAAGAGCCACTTGCAAGCCGGTCCTGGGCAGTCCGTGAGTAGAAACAGGAGGAGGGGCTGAGGAAGGGTGCGGTCTGGGTTGCCACCCAGGCTAGCCG…	InrAC|InrAC|InrAC	||	97226457|97226457|97245410	-	-
chr5:97222371..97222399,+	97222391	p3@Anxa3	[Anxa3]	Anxa3			Anxa3	12.8407	65.7898	489.251	35.9632	52.0934	121.215			7.098	30.9371	98.8869	1.85311	19.6541	107.741	777.154	266.17	1043.32	1.45061	-2.00854	-0.333904		0.123117	-0.641397	5.37999	4.10034	2.25299	5.76425	-3.127	1.66391	-1.43804	-0.082901	3	ENSMUST00000199330|ENSMUST00000031447|ENSMUST00000200379	89|229|590	302.667	>1|CGACTGGAGCAGAGAGGATCCTGGATCCAAGAGCCACTTGCAAGCCGGTCCTGGGCAGTCCATTGCTGTGATCTCGGCTTGAGAGAAAGGTGGACTGTC|>2|CGACTGGAGCAGAGAGGATCCTGGATCCAAGAGCCACTTGCAAGCCGGTCCTGGGCAGTCCGTGAGTAGAAACAGGAGGAGGGGCTGAGGAAGGGTGCGGTCTGGGTTGCCACCCAGGCTAGCCGGGAGCTACGGCCGGCCGAGGCTGATCTTTCACCTTCGCTGAGCTTCTGCCTGGGCTTCGCCTCCGCGGCCCCAAGGATTGCTGTGATCTCGGCTTGAGAGAAAGGTGGACTGTC|>3|CGACTGGAGCAGAGAGGATCCTGGATCCAAGAGCCACTTGCAAGCCGGTC…	-	||	97226457|97226457|97245410	-	-
[truncated: 8,565 more rows]
[truncated: 10 more columns]

## Sheet: Fig 1G
Translationally Upregulated					Translationally Downregulated
Promoter	TSS name	Gene			Promoter	TSS name	Gene
chr15:32174168..32174193,-	p3@0610007N19Rik,p3@Snord123	0610007N19Rik			chr11:51502116..51502171,-	p1@0610009B22Rik	0610009B22Rik
[truncated: 2,092 more rows]

## Sheet: Fig 1D
Gene names from all promoters with sum of reads >500
[truncated: 6,860 more rows]

[truncated: 2 more sheets: Fig 1I, Fig 1-S1C + text]
