# Supplementary figures and images for: Cap-proximal nucleotides via differential eIF4E binding and alternative promoter usage mediate translational response to energy stress
Source: eLife journal article supplement (doi:10.7554/elife.21907), 2017-02-08

**Figure 1–figure supplement 1**

**A.**

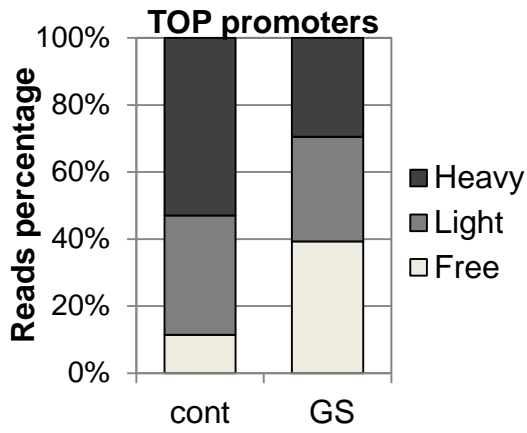

**B.**

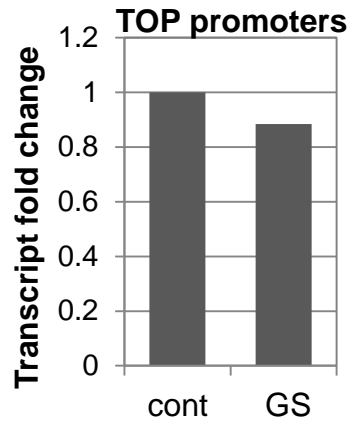

**C.**

**Features of GS-induced isoforms (mRNA level)**

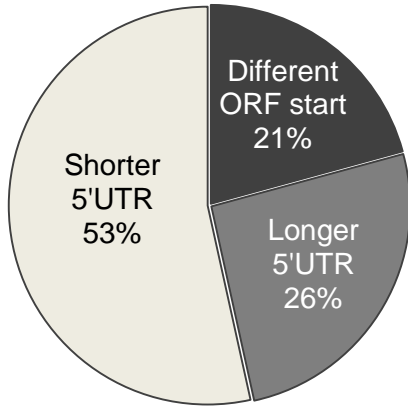

Supplement: supp [file elife-21907-supp-v1.zip]

A.

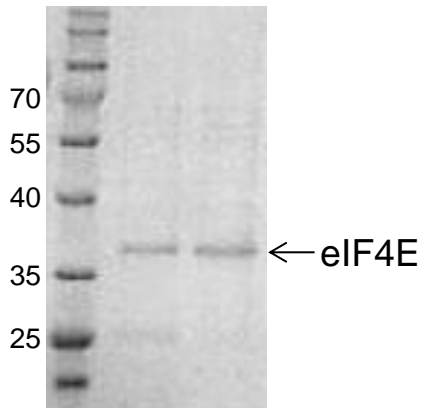

B.

| <i>P-values</i> | <b>ACU</b> | <b>CCU</b> |
|-----------------|------------|------------|
| <b>GCU</b>      | 0.007      | 9.4E-05    |
| <b>ACU</b>      |            | 2.6E-04    |

Supplement: supp [file elife-21907-supp-v1.zip › elife_poa_e21907_Figure_4_Figure_Supplement_1.pdf]

Figure 6—figure supplement 1

A.

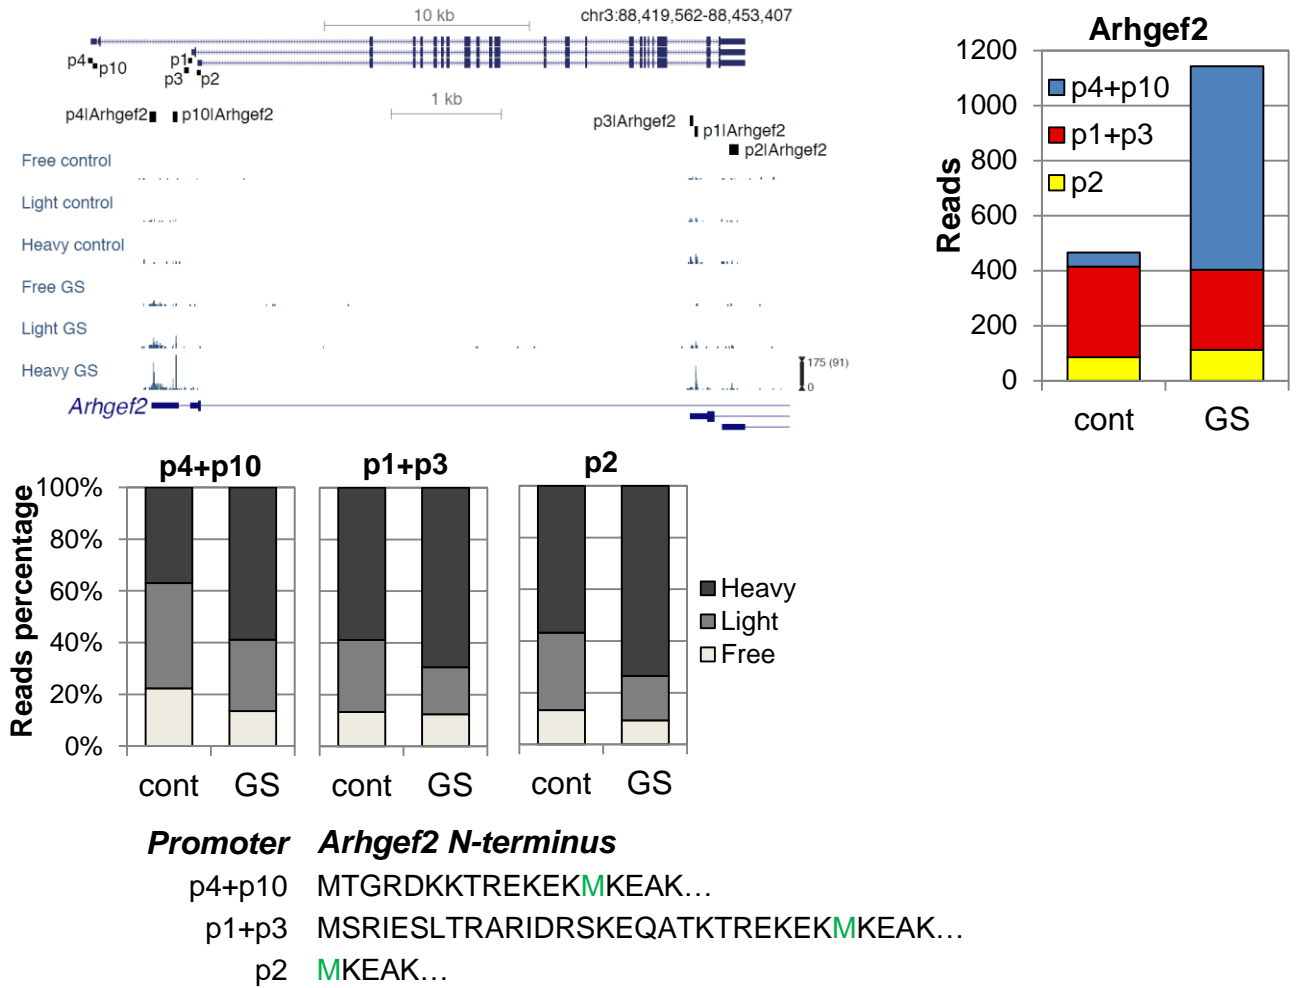

B.

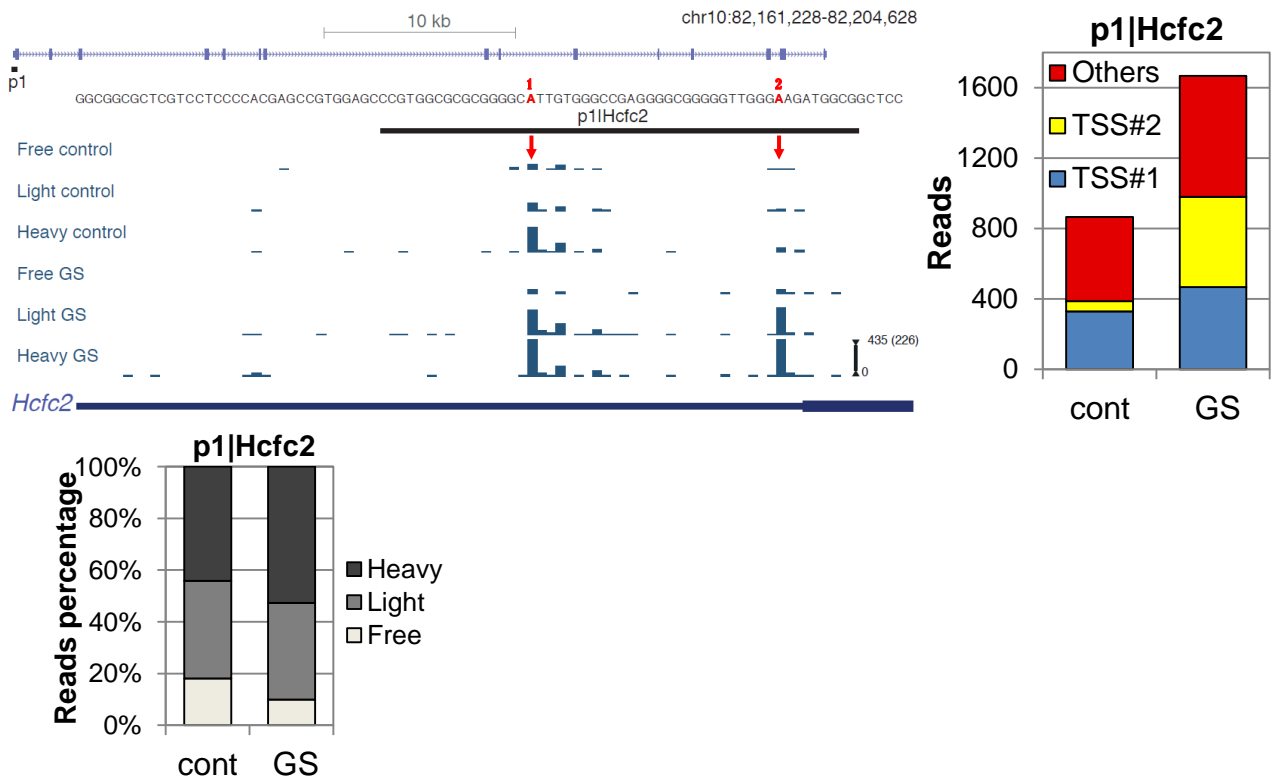

Supplement: supp [file elife-21907-supp-v1.zip › elife_poa_e21907_Figure_6_Figure_Supplement_1.pdf]

A.

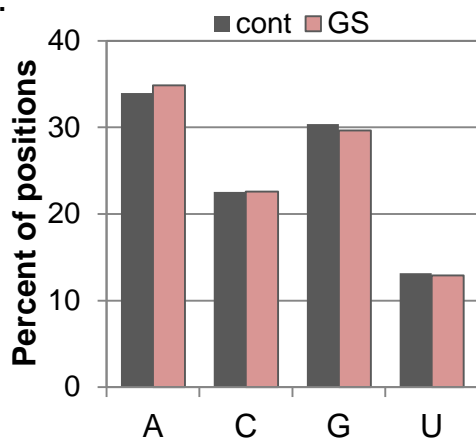

B.

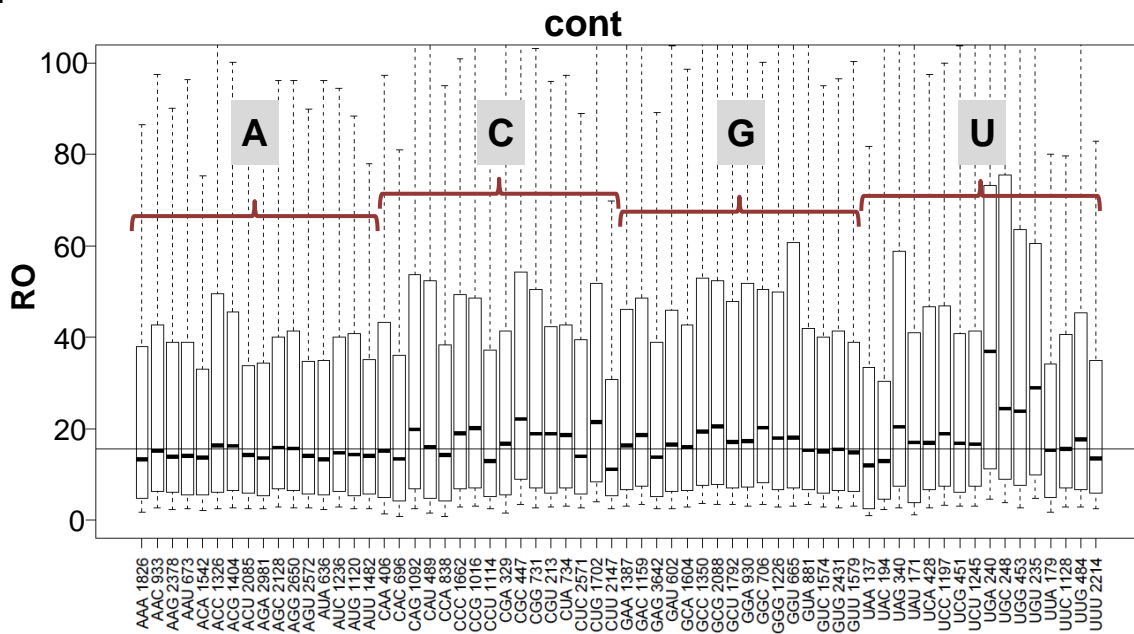

Supplement: supp [file elife-21907-supp-v1.zip › elife_poa_e21907_Figure_2_Figure_Supplement_1.pdf]

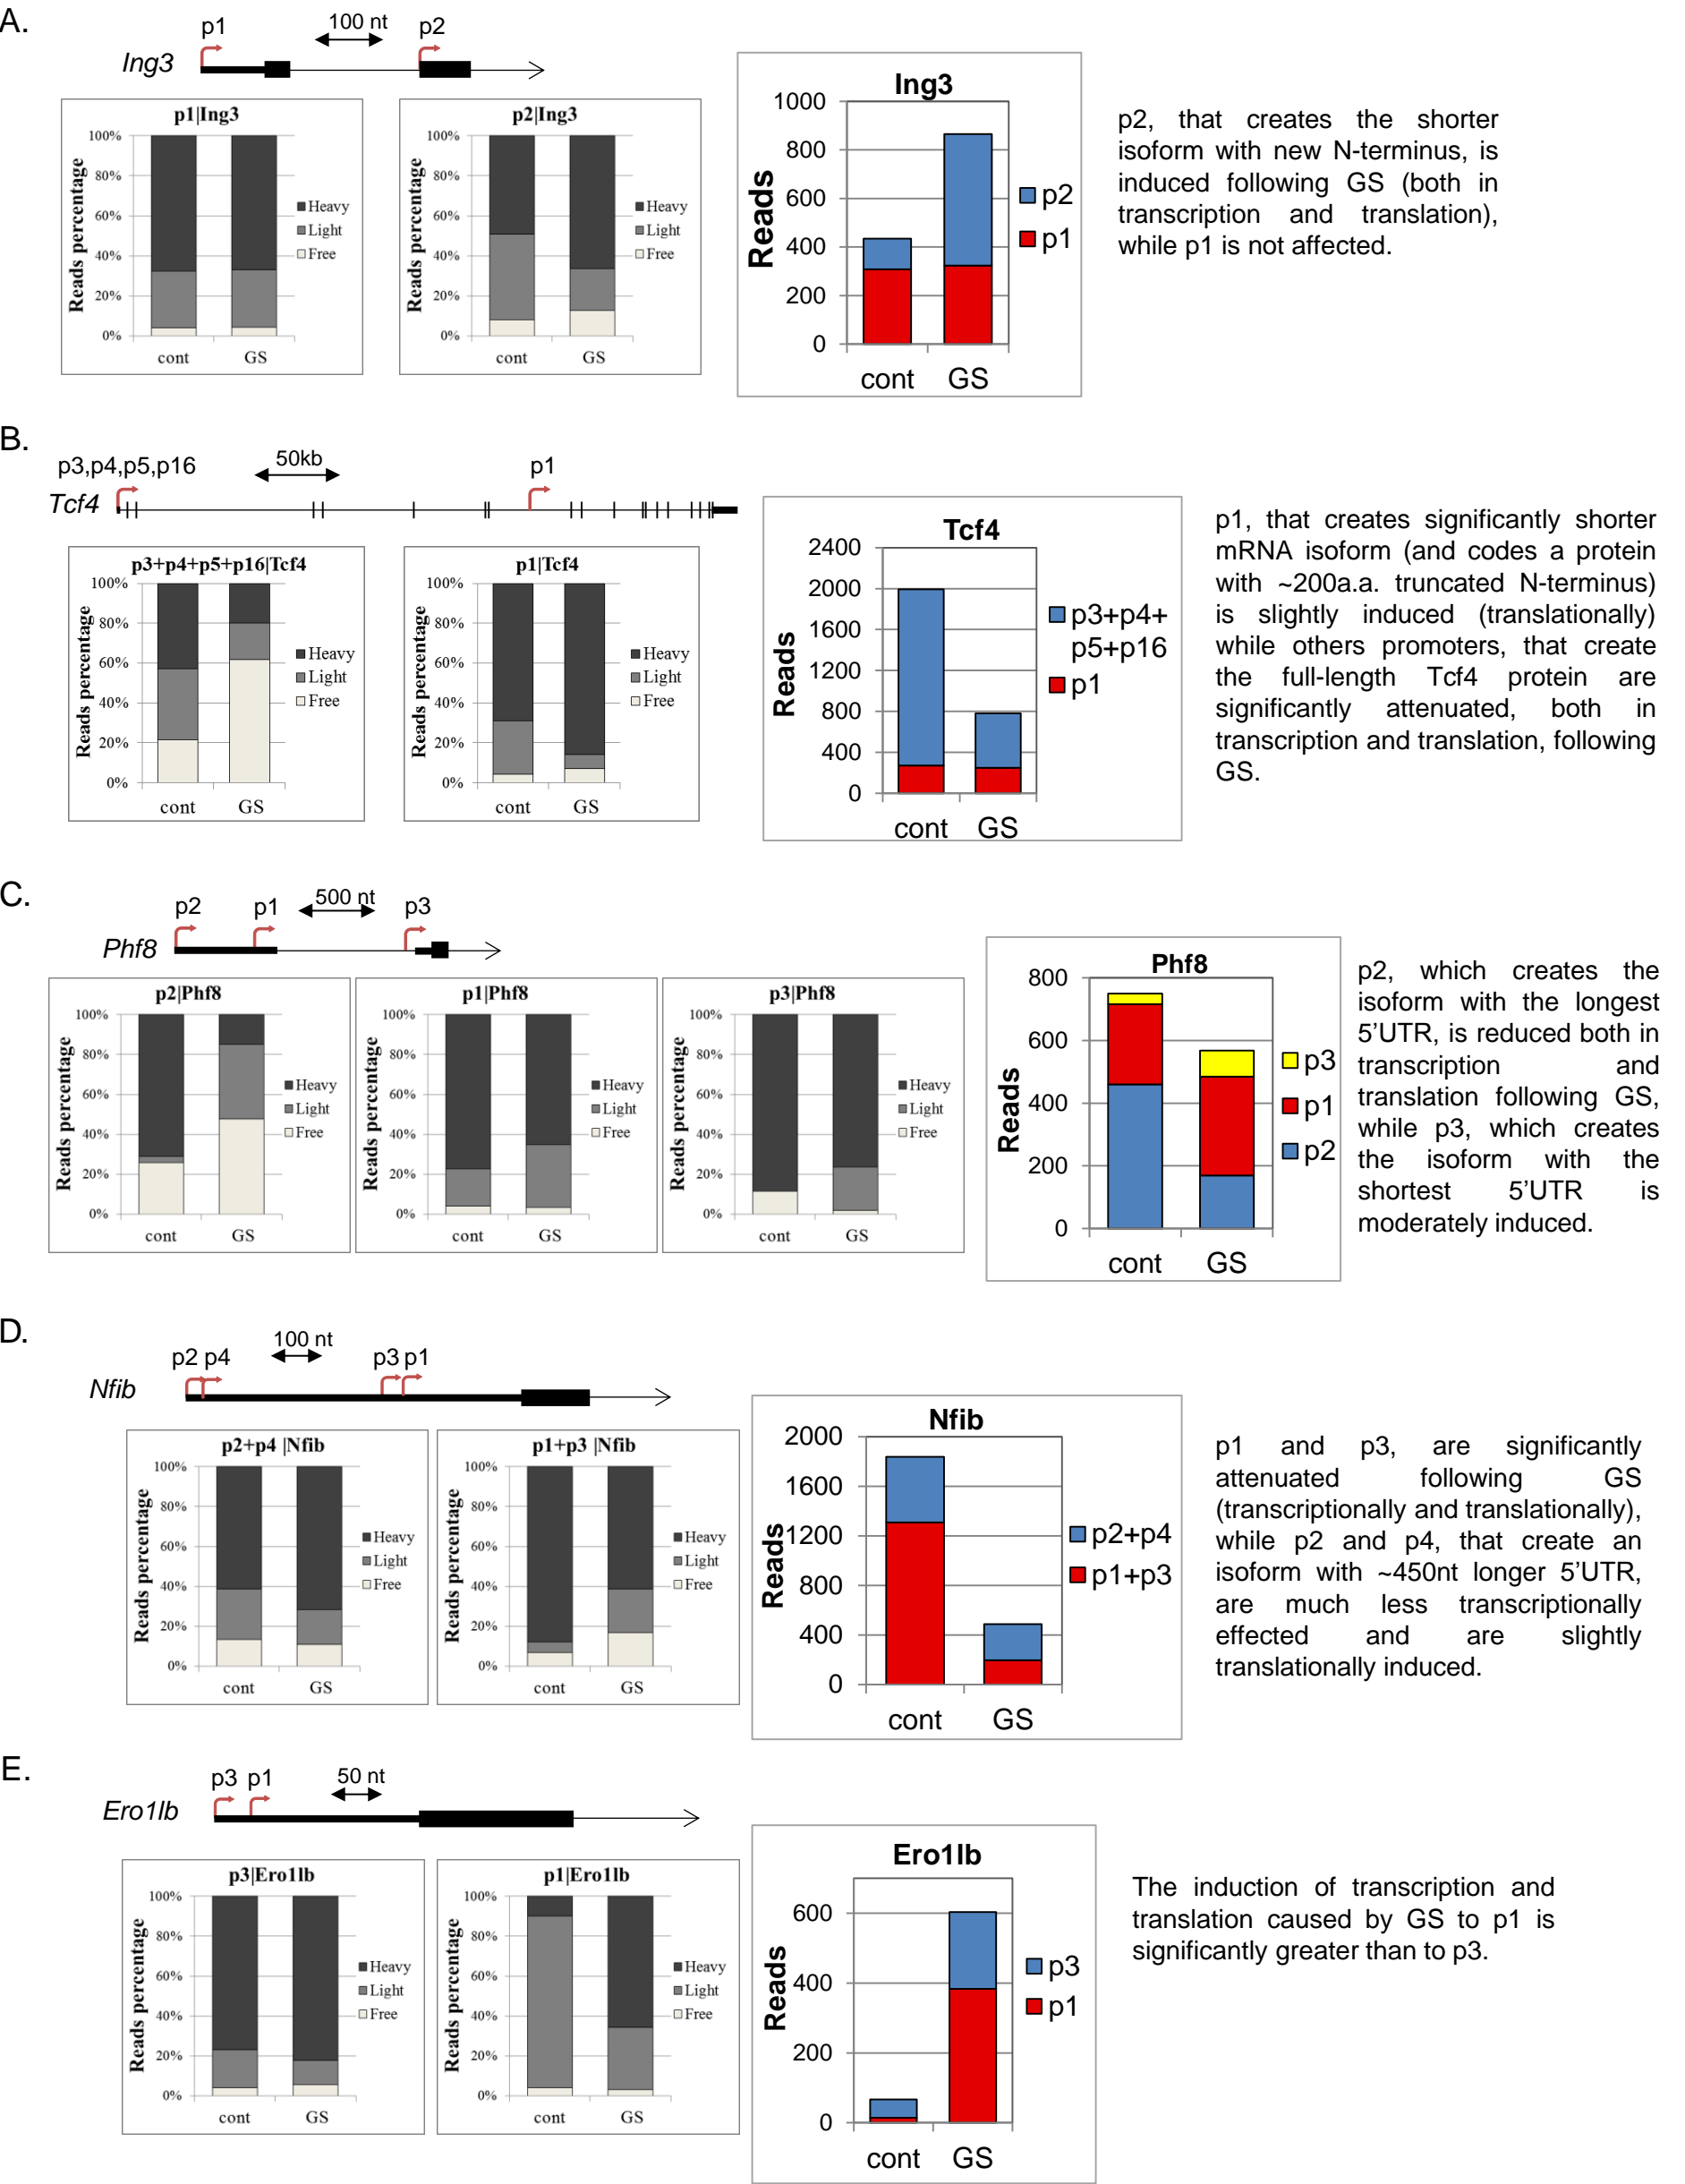

Supplement: supp [file elife-21907-supp-v1.zip › elife_poa_e21907_Figure_6_Figure_Supplement_2.pdf]
